# Supplementary material for: Optimising recovery from childhood moderate acute malnutrition: a randomized controlled trial
Source: Research Square preprint supplement (doi:10.21203/rs.3.rs-8585503/v1), 2026-01-29
Supplement: Supplementary file 1 [file 27dc4772bc89ddab23983994.docx]

*Supplementary information for:*

**Optimising recovery from childhood moderate acute malnutrition: a randomized controlled trial**

Portlock, T.¹*, Miller, C.¹*, Ho, D.¹, Pook, C.¹, Shennon, I.1, Shama, T.², Kakon, S.H.², Phua, HH.¹, Thorstensen, E.¹, Rahman, N.5, Gluckman, P.¹, Zeilani, M.³, Forrester, T.⁴‡, Haque, R.², Nelson, C.A. ⁵‡, O’Sullivan, J.M.¹⁶⁷‡

¹ The Liggins Institute, University of Auckland, New Zealand

² Infectious Diseases Division, International Centre for Diarrhoeal Disease Research, Bangladesh

³ Department of External Research and Nutrition Strategies, Nutriset SAS, Malaunay, France

⁴ Faculty of Medical Sciences, UWI Solutions for Developing Countries, The University of the West Indies, Jamaica

⁵ Department of Pediatrics, Boston Children’s Hospital and Harvard Medical School; Harvard Graduate School of Education, Boston, USA

⁶ The Maurice Wilkins Centre, The University of Auckland, New Zealand

⁷ MRC Lifecourse Epidemiology Unit, University of Southampton, UK

*These authors contributed equally.

‡Co-corresponding authors. Terrence Forrester, [Terrence.Forrester@uwisodeco.com](mailto:Terrence.Forrester@uwisodeco.com); Chuck Nelson, [Charles.Nelson@childrens.harvard.edu](mailto:Charles.Nelson@childrens.harvard.edu); Justin M. O’Sullivan, [justin.osullivan@acukland.ac.nz](mailto:justin.osullivan@acukland.ac.nz)

The sample preparation and liquid chromatography - tandem mass spectrometry (LCMSMS) analysis of plasma B-vitamers was carried out using a method published previously 1 . For this study, the following vitamers were measured: pantothenic acid (B5), 4-pyridoxic acid (B6), nicotinamide (B3), trimethylamine N-oxide (TMAO), riboflavin (B2), and thiamine (B1), Three plasma quality pools controls were used to monitor analyte recovery, inter- and intra-assay reproducibility. All analytes were recovered between 85 and 105%, with average inter- and intra assay coefficients of variation all less than 8%. Additional B-vitamers were included in the assay but the plasma results were all below the limits of detection. B-vitamers and (LOD / nM) nicotinuric acid (12.5), pyridoxal (15), pyridoxine (2), folic acid (10nM) and pyridoxamine (2).

Free amino acids were assayed from 20 µl of plasma with 15 µM L-Nor-Valine as internal standard by Ultra High Pressure Liquid Chromatography as previously described 2. Average intra-assay %CV for quality controls across all amino acids was less than 10%, inter-assay %CV less than 12%.

The sample preparation was robotized as follows. All liquid addition steps were carried out on an EpMotion 5075vt workstation (Eppendorf AG, Hamburg, Germany) equipped with single and eight channel pipetting tools of various volumes (50-1000 µL).

Samples (up to 82 per 96-well plate), and plasma quality controls (5 per plate) were precipitated prior to derivatization using 160µl of 0.04M sulphuric acid containing the internal standard and then 20µl 10% sodium tungstate. To complete the precipitation process, the plate was sealed, shaken for three minutes (4 °C) and then centrifuged at 1000g for 10 minutes (Avanti J-15R, Beckman Coulter, Nyon, Switzerland). Twenty microliters of pre-prepared standards (5 different concentrations across the physiological range), aqueous quality controls (3 per plate) and each of the protein free supernatants were then transferred to a new deep-well plate in a programmed pattern for derivatization. 140 µl of 0.2 M borate buffer (pH 8.8) was then added to each well followed by 20 µl of tagging reagent, 6-Aminoquinolyl-N-Hydroxysuccinimidyl Carbamate (AQC) (2.8 mg/ml in acetonitrile). The plate was then sealed and heated at 55 °C for 10 minutes to complete the tagging reaction, then transferred to the UPLC system for analysis.

**References**

1. Andraos, S. *et al.* Plasma B Vitamers: Population Epidemiology and Parent-Child Concordance in Children and Adults. *Nutrients 2021, Vol. 13, Page 821* 13, 821 (2021).

2. Milan, A. M. *et al.* The impact of heat treatment of bovine milk on gastric emptying and nutrient appearance in peripheral circulation in healthy females: a randomized controlled trial comparing pasteurized and ultra-high temperature milk. *Am J Clin Nutr* 119, 1200–1215 (2024).
