# Supplementary material for: Optimising recovery from childhood moderate acute malnutrition: a randomized controlled trial
Source: Research Square preprint supplement (doi:10.21203/rs.3.rs-8585503/v1), 2026-01-29
Supplement: Supplementary file 2 [file 50e19bcb5ff8b4ed0248d4ae.xlsx]

## Sheet: Contents
Sheet	Name	Description
Glossary	Glossary	Glossary of terms
S1	Table S1	Recipe
S2	Table S2	Mixed modelling changes to baseline datasets
S3	Table S3	Longitudinal Mixed modelling changes to timeseries datasets
S4	Table S4	Datasets used in the creation of a) the frozen VAE (both modifiable and non-modifiable data) and b) for counterfactual analysis (only the modifiable data). These datasets are a subset of those in Figure S1. The full dataset was used unless specified (italics).
S5	Table S5	Contributions (loadings) to the principal components (PCs) from principal component analysis (PCA) on the microbial abundance data at both baseline (_0) and one year later (_52)
S6	Table S6	Range of amino acid concentrations (µmol/L) of individuals in both clusters, as well as the suggested simulated change (average + 1.5 SD) for that cluster. Reference ranges from Mayo and SickKids included.
S7	Table S7	Comparison of metadata variables between the two clusters
S8	Table S8	Comparison of average PRSs between the two clusters
S9	Tabl S9	Redundancy analysis statistics

## Sheet: Glossary
Abbreviation	Description
WLZ_WHZ (z-score)	weight-for-height/length z-score
MUAC (cm)	mid-upper arm circumference
HC	head circumferance
MWW_pval	Mann Whitney U p-value
MWW_qval	Mann Whitney U q-value
FC	Fold change
Log2FC	log2 fold change
Log10FC	log10 fold change
diffmean	difference in mean values between source and target
source_true_summary	target value summary for when the source is true
source_false_summary	target value summary for when the source is false
coef	MaAsLin2 coefficient
stderr	Standard Error
N	Total number of samples for analysis
N.not.0	Total number of non-zero samples for analysis
pval	MaAsLin2 p-value
qval	MaAsLin2 q-value
SHAP	mean SHAP value
cor	Spearman correlation
SHAP_interactsmean	(mean Σ(|SHAP interaction|)

## Sheet: S1
Nutrient	Plumpy™Nut (100g)	Plumpy™Nut (92g)	eRUTF (100g)	eRUTF (d dose/92g)	Rice-Lentil RUSF (100g)	Rice-Lentil RUSF (50g/serving)
Total energy (kcal)	543	500	543	500	528	264
Protein kcal (% of total energy)	10.3	10.3	10.3	10.3
Proteins (g)	13.9	12.8	13.9	12.8	10.2	5.1
Dairy proteins (% of total proteins)	50	50	50	50
Lipid kcal (% of total energy)	55	55	55	55
Lipids (g)	32.9	30.3	32.9	30.3	29.6	14.8
ALA* energy (% of total energy)	0.7	0.7	1.7	1.7
ALA* (g)	0.42	0.39	1.02	0.94
LA* energy (% of total energy)	8	8	6.3	6.3
LA* (g)	4.67	4.3	3.7	3.4
Ratio LA/ALA	11	11	3.6	3.6
DHA (mg)			87	80
EPA (mg)			147	135
Total fibers (g)	1.6	1.5	5.6	5.5	2.2	1.1
Prebiotics (combined Inulin & FOS)			4.3	4
Calcium (mg)	328	302	328	302	572	286
Phosphorus (mg)	373	343	373	343	480	240
Potassium (mg)	1273	1171	1273	1171	634	317
Magnesium (mg)	87	80	87	80	103.048	51.524
Zinc (mg)	12.8	11.8	12.8	11.8	8.3	4.15
Copper (mg)	1.6	1.5	1.6	1.5	0.68	0.34
Iron (mg)	11.2	10.3	11.2	10.3	11.81	5.905
Iodine (Âµg)	107	98	107	98
Selenium (Âµg)	30	28	30	28
Sodium (mg)	179	165	179	165	41	20.5
Vitamin A / Retinol (Âµg)	860	790	860	790	855	427.5
Lutein (mg)			1.026	0.944
Zeaxanthin (mg)			0.048 - 0.109	0.044 - 0.1
Vitamin D (Âµg)	15	14	15	14
Vitamin E (mg)	20	18.4	20	18.4	20.82	10.41
Vitamin C (mg)	50	46	50	46	32	16
Vitamin B1 (mg)	0.5	0.46	0.5	0.5	0.95	0.475
Vitamin B2 (mg)	1.6	1.5	1.6	1.5	1.03	0.515
Vitamin B6 (mg)	0.6	0.55	0.6	0.55
Vitamin B12 (Âµg)	1.6	1.5	1.6	1.5
Vitamin K (Âµg)	15.7	14.4	15.7	14.4
Biotin (Âµg)	61	56	61	56
Folic acid (Âµg)	200	184	200	184
Pantothenic acid (mg)	3	2.8	3	2.8
Niacin (mg)	5	4.6	5	4.6

## Sheet: S2
feature	metadata	value	name	coef	null_hypothesis	stderr	pval_individual	qval_individual	pval_joint	qval_joint	error	model	N	N_not_zero	filename
aspartic_acid	Recovery	Recovered	RecoveryRecovered	-0.646967	6.40852	0.504472	2.94182e-05	0.00135323	2.94182e-05	0.00135323		abundance	134	134	aa
glutamic_acid	Recovery	Recovered	RecoveryRecovered	-1.81374	6.40852	2.85064	0.0116213	0.129589	0.0116213	0.129589		abundance	134	134	aa
methionine	Recovery	Recovered	RecoveryRecovered	1.57602	6.40852	1.15117	0.0125263	0.129589	0.0125263	0.129589		abundance	134	134	aa
citrulline	Recovery	Recovered	RecoveryRecovered	1.11231	6.40852	1.48712	0.0131224	0.129589	0.0131224	0.129589		abundance	134	134	aa
hydroxyproline	Recovery	Recovered	RecoveryRecovered	-0.49513	6.40852	2.33771	0.0140857	0.129589	0.0140857	0.129589		abundance	134	134	aa
taurine	Recovery	Recovered	RecoveryRecovered	-4.00107	6.40852	4.32593	0.0237397	0.182004	0.0237397	0.182004		abundance	134	134	aa
glycine	Sex	Female	SexFemale	-16.377	0.278415	10.0803	0.10474	0.688291	0.10474	0.688291		abundance	134	134	aa
glutamic_acid	Sex	Female	SexFemale	5.32237	0.278415	2.85064	0.14356	0.73967	0.14356	0.73967		abundance	134	134	aa
ornithine	Recovery	Recovered	RecoveryRecovered	1.68438	6.40852	3.21982	0.162621	0.73967	0.162621	0.73967		abundance	134	134	aa
asparagine	Recovery	Recovered	RecoveryRecovered	3.27051	6.40852	2.00495	0.180859	0.73967	0.180859	0.73967		abundance	134	134	aa
citrulline	Sex	Female	SexFemale	-3.00435	0.278415	1.48712	0.18159	0.73967	0.18159	0.73967		abundance	134	134	aa
hydroxyproline	Sex	Female	SexFemale	-3.68124	0.278415	2.33771	0.192957	0.73967	0.192957	0.73967		abundance	134	134	aa
valine	Recovery	Recovered	RecoveryRecovered	16.237	6.40852	8.44	0.248809	0.880401	0.248809	0.880401		abundance	134	134	aa
histidine	Recovery	Recovered	RecoveryRecovered	3.50189	6.40852	2.60152	0.295837	0.934291	0.295837	0.934291		abundance	134	134	aa
lysine	Recovery	Recovered	RecoveryRecovered	13.0505	6.40852	6.50617	0.313359	0.934291	0.313359	0.934291		abundance	134	134	aa
threonine	Sex	Female	SexFemale	-4.58199	0.278415	5.28832	0.379469	0.934291	0.379469	0.934291		abundance	134	134	aa
lysine	Sex	Female	SexFemale	6.11438	0.278415	6.50617	0.383207	0.934291	0.383207	0.934291		abundance	134	134	aa
alanine	Sex	Female	SexFemale	17.3863	0.278415	20.2665	0.398915	0.934291	0.398915	0.934291		abundance	134	134	aa
glutamine	Sex	Female	SexFemale	19.1478	0.278415	23.4311	0.420947	0.934291	0.420947	0.934291		abundance	134	134	aa
taurine	Sex	Female	SexFemale	-3.4344	0.278415	4.32593	0.423289	0.934291	0.423289	0.934291		abundance	134	134	aa
ornithine	Sex	Female	SexFemale	3.00383	0.278415	3.21982	0.458211	0.934291	0.458211	0.934291		abundance	134	134	aa
trytophan	Recovery	Recovered	RecoveryRecovered	4.14712	6.40852	2.97271	0.460169	0.934291	0.460169	0.934291		abundance	134	134	aa
phenylalanine	Recovery	Recovered	RecoveryRecovered	3.49112	6.40852	4.16774	0.482806	0.934291	0.482806	0.934291		abundance	134	134	aa
arginine	Recovery	Recovered	RecoveryRecovered	8.99807	6.40852	3.67713	0.502043	0.934291	0.502043	0.934291		abundance	134	134	aa
proline	Sex	Female	SexFemale	10.5121	0.278415	15.4539	0.507767	0.934291	0.507767	0.934291		abundance	134	134	aa
proline	Recovery	Recovered	RecoveryRecovered	14.6288	6.40852	15.4539	0.591891	0.992158	0.591891	0.992158		abundance	134	134	aa
trytophan	Sex	Female	SexFemale	-1.54455	0.278415	2.97271	0.595077	0.992158	0.595077	0.992158		abundance	134	134	aa
leucine	Recovery	Recovered	RecoveryRecovered	8.89796	6.40852	4.86554	0.610502	0.992158	0.610502	0.992158		abundance	134	134	aa
threonine	Recovery	Recovered	RecoveryRecovered	8.83745	6.40852	5.28832	0.646525	0.992158	0.646525	0.992158		abundance	134	134	aa
alanine	Recovery	Recovered	RecoveryRecovered	15.0391	6.40852	20.2665	0.667621	0.992158	0.667621	0.992158		abundance	134	134	aa
serine	Sex	Female	SexFemale	-1.86823	0.278415	5.399	0.699775	0.992158	0.699775	0.992158		abundance	134	134	aa
glutamine	Recovery	Recovered	RecoveryRecovered	15.3395	6.40852	23.4311	0.701018	0.992158	0.701018	0.992158		abundance	134	134	aa
histidine	Sex	Female	SexFemale	-0.873114	0.278415	2.60152	0.711765	0.992158	0.711765	0.992158		abundance	134	134	aa
tyrosine	Recovery	Recovered	RecoveryRecovered	7.81582	6.40852	4.80808	0.76997	0.998702	0.76997	0.998702		abundance	134	134	aa
valine	Sex	Female	SexFemale	2.49537	0.278415	8.44	0.79421	0.998702	0.79421	0.998702		abundance	134	134	aa
glycine	Recovery	Recovered	RecoveryRecovered	8.85081	6.40852	10.0803	0.805594	0.998702	0.805594	0.998702		abundance	134	134	aa
serine	Recovery	Recovered	RecoveryRecovered	7.72344	6.40852	5.399	0.806061	0.998702	0.806061	0.998702		abundance	134	134	aa
tyrosine	Sex	Female	SexFemale	-0.631399	0.278415	4.80808	0.855519	0.998702	0.855519	0.998702		abundance	134	134	aa
isoleucine	Sex	Female	SexFemale	0.850188	0.278415	3.09313	0.870354	0.998702	0.870354	0.998702		abundance	134	134	aa
arginine	Sex	Female	SexFemale	-0.370648	0.278415	3.67713	0.871311	0.998702	0.871311	0.998702		abundance	134	134	aa
leucine	Sex	Female	SexFemale	0.811845	0.278415	4.86554	0.915979	0.998702	0.915979	0.998702		abundance	134	134	aa
asparagine	Sex	Female	SexFemale	0.0343947	0.278415	2.00495	0.930886	0.998702	0.930886	0.998702		abundance	134	134	aa
phenylalanine	Sex	Female	SexFemale	0.546676	0.278415	4.16774	0.951635	0.998702	0.951635	0.998702		abundance	134	134	aa
aspartic_acid	Sex	Female	SexFemale	0.341921	0.278415	0.504472	0.974967	0.998702	0.974967	0.998702		abundance	134	134	aa
methionine	Sex	Female	SexFemale	0.214908	0.278415	1.15117	0.976991	0.998702	0.976991	0.998702		abundance	134	134	aa
isoleucine	Recovery	Recovered	RecoveryRecovered	6.40852	6.40852	3.09313	1	1	1	1		abundance	134	134	aa
Richness	Recovery	Recovered	RecoveryRecovered	1.46981	-0.044703	4.98839	0.761321	1	0.761321	1		abundance	150	150	alpha_diversity
Faiths_PD	Sex	Female	SexFemale	0.0120546	0.031193	0.145429	0.905831	1	0.905831	1		abundance	150	150	alpha_diversity
Richness	Sex	Female	SexFemale	0.399575	0.031193	4.967	0.940371	1	0.940371	1		abundance	150	150	alpha_diversity
Shannon	Recovery	Recovered	RecoveryRecovered	-0.0455816	-0.044703	0.0930498	0.998894	1	0.998894	1		abundance	150	150	alpha_diversity
Faiths_PD	Recovery	Recovered	RecoveryRecovered	-0.044703	-0.044703	0.146055	1	1	1	1		abundance	150	150	alpha_diversity
Shannon	Sex	Female	SexFemale	0.031193	0.031193	0.0926508	1	1	1	1		abundance	150	150	alpha_diversity
WLZ_WHZ	Sex	Female	SexFemale	0.0288898	-0.523242	0.0423296	0.0648346	0.439292	0.0648346	0.439292		abundance	151	151	anthro
HC	Sex	Female	SexFemale	-1.12819	-0.523242	0.194503	0.0878585	0.439292	0.0878585	0.439292		abundance	151	151	anthro
Length	Sex	Female	SexFemale	-1.19474	-0.523242	0.38171	0.158131	0.527104	0.158131	0.527104		abundance	151	151	anthro
HC	Recovery	Recovered	RecoveryRecovered	0.263229	0.114843	0.195537	0.428415	1	0.428415	1		abundance	151	151	anthro
MUAC	Sex	Female	SexFemale	-0.336221	-0.523242	0.0748947	0.53685	1	0.53685	1		abundance	151	151	anthro
Length	Recovery	Recovered	RecoveryRecovered	0.279343	0.114843	0.383739	0.656592	1	0.656592	1		abundance	151	151	anthro
MUAC	Recovery	Recovered	RecoveryRecovered	0.0911837	0.114843	0.0752929	0.751065	1	0.751065	1		abundance	151	151	anthro
Weight	Recovery	Recovered	RecoveryRecovered	0.108608	0.114843	0.0716861	0.928606	1	0.928606	1		abundance	151	151	anthro
WLZ_WHZ	Recovery	Recovered	RecoveryRecovered	0.114843	0.114843	0.0425547	1	1	1	1		abundance	151	151	anthro
Weight	Sex	Female	SexFemale	-0.523242	-0.523242	0.071307	1	1	1	1		abundance	151	151	anthro
ADHD_PRS	Sex	Female	SexFemale	0.00105001	-1.59123e-05	0.000694161	0.240038	1	0.240038	1		abundance	149	149	genetics
IBD_CD_PRS	Sex	Female	SexFemale	-0.00149232	-1.59123e-05	0.00115298	0.250547	1	0.250547	1		abundance	149	149	genetics
IBD_UC_PRS	Sex	Female	SexFemale	-0.00109826	-1.59123e-05	0.00127872	0.435349	1	0.435349	1		abundance	149	149	genetics
NAFLD_PRS	Recovery	Recovered	RecoveryRecovered	-0.00293214	2.4033e-05	0.0039061	0.451452	1	0.451452	1		abundance	149	149	genetics
IBD_UC_PRS	Recovery	Recovered	RecoveryRecovered	0.000982295	2.4033e-05	0.00128782	0.4856	1	0.4856	1		abundance	149	149	genetics
IBD_CD_PRS	Recovery	Recovered	RecoveryRecovered	0.000781836	2.4033e-05	0.00116119	0.54597	1	0.54597	1		abundance	149	149	genetics
NAFLD_PRS	Sex	Female	SexFemale	0.00222868	-1.59123e-05	0.00387849	0.564671	1	0.564671	1		abundance	149	149	genetics
ADHD_PRS	Recovery	Recovered	RecoveryRecovered	-0.000150174	2.4033e-05	0.000699101	0.83799	1	0.83799	1		abundance	149	149	genetics
BMI_PRS	Recovery	Recovered	RecoveryRecovered	-5.77023e-05	2.4033e-05	5.7764e-05	0.87813	1	0.87813	1		abundance	149	149	genetics
Height_PRS	Sex	Female	SexFemale	-9.07912e-05	-1.59123e-05	0.000134398	0.901152	1	0.901152	1		abundance	149	149	genetics
Intelligent_PRS	Sex	Female	SexFemale	5.37548e-05	-1.59123e-05	9.79408e-05	0.90754	1	0.90754	1		abundance	149	149	genetics
Height_PRS	Recovery	Recovered	RecoveryRecovered	7.89801e-05	2.4033e-05	0.000135355	0.919153	1	0.919153	1		abundance	149	149	genetics
BMI_PRS	Sex	Female	SexFemale	2.21526e-06	-1.59123e-05	5.73558e-05	0.97584	1	0.97584	1		abundance	149	149	genetics
EA_PRS	Recovery	Recovered	RecoveryRecovered	3.08227e-05	2.4033e-05	1.68209e-05	0.989797	1	0.989797	1		abundance	149	149	genetics
Intelligent_PRS	Recovery	Recovered	RecoveryRecovered	1.72432e-05	2.4033e-05	9.86378e-05	0.989888	1	0.989888	1		abundance	149	149	genetics
EA_PRS	Sex	Female	SexFemale	-1.59123e-05	-1.59123e-05	1.6702e-05	1	1	1	1		abundance	149	149	genetics
ear_to_ear_measurement_front_cm	Recovery	Recovered	RecoveryRecovered	-0.119372	0.21612	0.158689	0.0824373	0.641436	0.0824373	0.641436		abundance	150	150	head
head_circumference_cm	Sex	Female	SexFemale	-1.07166	-0.691356	0.195897	0.128287	0.641436	0.128287	0.641436		abundance	150	150	head
ear_to_ear_measurement_top_head_cm	Sex	Female	SexFemale	-1.07492	-0.691356	0.28898	0.219596	0.654263	0.219596	0.654263		abundance	150	150	head
ear_to_ear_measurement_back_cm	Sex	Female	SexFemale	-0.47347	-0.691356	0.150795	0.311442	0.654263	0.311442	0.654263		abundance	150	150	head
nasion_to_inion_measurement_cm	Recovery	Recovered	RecoveryRecovered	0.437844	0.21612	0.308943	0.436079	0.654263	0.436079	0.654263		abundance	150	150	head
ear_to_ear_measurement_back_cm	Recovery	Recovered	RecoveryRecovered	0.33685	0.21612	0.151677	0.454024	0.654263	0.454024	0.654263		abundance	150	150	head
nasion_to_inion_measurement_cm	Sex	Female	SexFemale	-0.469533	-0.691356	0.307147	0.457984	0.654263	0.457984	0.654263		abundance	150	150	head
ear_to_ear_measurement_top_head_cm	Recovery	Recovered	RecoveryRecovered	0.120705	0.21612	0.29067	0.707719	0.884649	0.707719	0.884649		abundance	150	150	head
head_circumference_cm	Recovery	Recovered	RecoveryRecovered	0.21612	0.21612	0.197042	1	1	1	1		abundance	150	150	head
ear_to_ear_measurement_front_cm	Sex	Female	SexFemale	-0.691356	-0.691356	0.157767	1	1	1	1		abundance	150	150	head
fa_16:1;o2	Sex	Female	SexFemale	-0.565582	0.573037	0.283604	0.000135456	0.111887	0.000135456	0.111887		abundance	146	146	lipids
spb_26:0;o2	Sex	Female	SexFemale	-0.545368	0.573037	0.299639	0.000366139	0.12293	0.000366139	0.12293		abundance	146	146	lipids
st_27:1;o;s	Sex	Female	SexFemale	-4.27809	0.573037	1.34791	0.000446478	0.12293	0.000446478	0.12293		abundance	146	146	lipids
spb_24:0;o2	Sex	Female	SexFemale	-0.955428	0.573037	0.443667	0.000849141	0.128642	0.000849141	0.128642		abundance	146	146	lipids
pi_35:2	Sex	Female	SexFemale	-1.82978	0.573037	0.706898	0.000920572	0.128642	0.000920572	0.128642		abundance	146	146	lipids
sm_42:3;o2	Sex	Female	SexFemale	-0.443063	0.573037	0.294412	0.000934448	0.128642	0.000934448	0.128642		abundance	146	146	lipids
ce_18:4	Sex	Female	SexFemale	-0.452171	0.573037	0.308011	0.00137586	0.162351	0.00137586	0.162351		abundance	146	146	lipids
lpc_17:1/0:0	Sex	Female	SexFemale	-0.710857	0.573037	0.417115	0.00280345	0.216952	0.00280345	0.216952		abundance	146	146	lipids
tg_26:0	Recovery	Recovered	RecoveryRecovered	-0.357294	0.448403	0.260428	0.0031817	0.216952	0.0031817	0.216952		abundance	146	146	lipids
sm_41:9;o2	Recovery	Recovered	RecoveryRecovered	-0.236661	0.448403	0.223159	0.00379157	0.216952	0.00379157	0.216952		abundance	146	146	lipids
pe_o-40:11	Recovery	Recovered	RecoveryRecovered	-0.886275	0.448403	0.448722	0.00379739	0.216952	0.00379739	0.216952		abundance	146	146	lipids
pc_39:0	Sex	Female	SexFemale	0.0248327	0.573037	0.175652	0.00399358	0.216952	0.00399358	0.216952		abundance	146	146	lipids
ce_21:4	Sex	Female	SexFemale	-1.07905	0.573037	0.564459	0.00420145	0.216952	0.00420145	0.216952		abundance	146	146	lipids
spb_26:0;o2	Recovery	Recovered	RecoveryRecovered	-0.444933	0.448403	0.300913	0.00425351	0.216952	0.00425351	0.216952		abundance	146	146	lipids
pc_34:4	Sex	Female	SexFemale	-1.72774	0.573037	0.792603	0.00439999	0.216952	0.00439999	0.216952		abundance	146	146	lipids
tg_55:1	Recovery	Recovered	RecoveryRecovered	-0.603919	0.448403	0.359321	0.00459991	0.216952	0.00459991	0.216952		abundance	146	146	lipids
pi_34:2	Recovery	Recovered	RecoveryRecovered	5.54359	0.448403	1.77126	0.00465913	0.216952	0.00465913	0.216952		abundance	146	146	lipids
fa_23:0	Recovery	Recovered	RecoveryRecovered	-0.552425	0.448403	0.341891	0.00472777	0.216952	0.00472777	0.216952		abundance	146	146	lipids
cer_43:1;o2	Sex	Female	SexFemale	-1.18153	0.573037	0.615413	0.00517671	0.225051	0.00517671	0.225051		abundance	146	146	lipids
tg_58:8	Sex	Female	SexFemale	3.38502	0.573037	1.00159	0.00580749	0.229068	0.00580749	0.229068		abundance	146	146	lipids
tg_28:0	Recovery	Recovered	RecoveryRecovered	-0.424608	0.448403	0.307661	0.00628551	0.229068	0.00628551	0.229068		abundance	146	146	lipids
fa_23:0	Sex	Female	SexFemale	-0.386492	0.573037	0.340443	0.00631636	0.229068	0.00631636	0.229068		abundance	146	146	lipids
pi_34:1	Recovery	Recovered	RecoveryRecovered	4.37645	0.448403	1.41848	0.00637841	0.229068	0.00637841	0.229068		abundance	146	146	lipids
tg_58:7	Sex	Female	SexFemale	3.70407	0.573037	1.14227	0.00698921	0.240545	0.00698921	0.240545		abundance	146	146	lipids
tg_62:13	Recovery	Recovered	RecoveryRecovered	-0.34983	0.448403	0.291058	0.00819731	0.267729	0.00819731	0.267729		abundance	146	146	lipids
fahfa_28:5;o	Sex	Female	SexFemale	-0.208978	0.573037	0.287043	0.00853937	0.267729	0.00853937	0.267729		abundance	146	146	lipids
tg_26:0	Sex	Female	SexFemale	-0.133568	0.573037	0.259325	0.00897297	0.267729	0.00897297	0.267729		abundance	146	146	lipids
sm_31:1;o2	Sex	Female	SexFemale	-0.585913	0.573037	0.433959	0.00907555	0.267729	0.00907555	0.267729		abundance	146	146	lipids
tg_24:0	Sex	Female	SexFemale	-0.253817	0.573037	0.309122	0.00983022	0.26999	0.00983022	0.26999		abundance	146	146	lipids
nae_18:1	Sex	Female	SexFemale	-0.313839	0.573037	0.334344	0.0100432	0.26999	0.0100432	0.26999		abundance	146	146	lipids
fa_12:0	Recovery	Recovered	RecoveryRecovered	-0.263756	0.448403	0.265634	0.0101328	0.26999	0.0101328	0.26999		abundance	146	146	lipids
pc_35:1	Sex	Female	SexFemale	-0.726992	0.573037	0.498586	0.0107479	0.275087	0.0107479	0.275087		abundance	146	146	lipids
nae_18:2	Recovery	Recovered	RecoveryRecovered	-0.280674	0.448403	0.275342	0.0109902	0.275087	0.0109902	0.275087		abundance	146	146	lipids
tg_56:7	Sex	Female	SexFemale	3.17604	0.573037	1.02751	0.012543	0.304721	0.012543	0.304721		abundance	146	146	lipids
lpc_16:1/0:0	Sex	Female	SexFemale	-1.52617	0.573037	0.837513	0.0134131	0.31655	0.0134131	0.31655		abundance	146	146	lipids
fa_18:2;o2	Sex	Female	SexFemale	-0.387228	0.573037	0.386762	0.0155552	0.341995	0.0155552	0.341995		abundance	146	146	lipids
pi_32:1	Sex	Female	SexFemale	-1.16952	0.573037	0.714419	0.0164113	0.341995	0.0164113	0.341995		abundance	146	146	lipids
dg_30:0	Sex	Female	SexFemale	-0.259136	0.573037	0.338968	0.0168187	0.341995	0.0168187	0.341995		abundance	146	146	lipids
mg_18:2	Sex	Female	SexFemale	0.173818	0.573037	0.152902	0.0168322	0.341995	0.0168322	0.341995		abundance	146	146	lipids
nae_18:2	Sex	Female	SexFemale	-0.10594	0.573037	0.274176	0.0170621	0.341995	0.0170621	0.341995		abundance	146	146	lipids
fahfa_24:3;o	Recovery	Recovered	RecoveryRecovered	-2.91238	0.448403	1.40134	0.0178171	0.341995	0.0178171	0.341995		abundance	146	146	lipids
tg_28:0	Sex	Female	SexFemale	-0.170258	0.573037	0.306358	0.0186107	0.341995	0.0186107	0.341995		abundance	146	146	lipids
pc_o-36:2	Sex	Female	SexFemale	-1.07334	0.573037	0.692323	0.0192795	0.341995	0.0192795	0.341995		abundance	146	146	lipids
dg_52:2	Sex	Female	SexFemale	3.18503	0.573037	1.10302	0.0193117	0.341995	0.0193117	0.341995		abundance	146	146	lipids
ps_36:1	Recovery	Recovered	RecoveryRecovered	-0.628777	0.448403	0.451051	0.0194355	0.341995	0.0194355	0.341995		abundance	146	146	lipids
fahfa_28:2;2o	Recovery	Recovered	RecoveryRecovered	-1.34118	0.448403	0.755338	0.0194996	0.341995	0.0194996	0.341995		abundance	146	146	lipids
tg_24:0	Recovery	Recovered	RecoveryRecovered	-0.296508	0.448403	0.310436	0.0198812	0.341995	0.0198812	0.341995		abundance	146	146	lipids
fa_18:4	Sex	Female	SexFemale	-0.677993	0.573037	0.53226	0.0208716	0.341995	0.0208716	0.341995		abundance	146	146	lipids
tg_62:14	Recovery	Recovered	RecoveryRecovered	-0.277478	0.448403	0.306394	0.021905	0.341995	0.021905	0.341995		abundance	146	146	lipids
ba_24:1;o4;t	Recovery	Recovered	RecoveryRecovered	-0.496768	0.448403	0.404011	0.0222034	0.341995	0.0222034	0.341995		abundance	146	146	lipids
lpc_o-16:1	Sex	Female	SexFemale	-1.17215	0.573037	0.753953	0.0223635	0.341995	0.0223635	0.341995		abundance	146	146	lipids
pe_40:7	Sex	Female	SexFemale	-0.201129	0.573037	0.331065	0.0229113	0.341995	0.0229113	0.341995		abundance	146	146	lipids
fahfa_28:5;o	Recovery	Recovered	RecoveryRecovered	-0.229421	0.448403	0.288263	0.0232379	0.341995	0.0232379	0.341995		abundance	146	146	lipids
tg_58:12	Recovery	Recovered	RecoveryRecovered	-0.235875	0.448403	0.291267	0.0235072	0.341995	0.0235072	0.341995		abundance	146	146	lipids
sm_38:1;o2	Sex	Female	SexFemale	0.0583476	0.573037	0.215336	0.0235085	0.341995	0.0235085	0.341995		abundance	146	146	lipids
tg_41:0	Sex	Female	SexFemale	0.0065649	0.573037	0.240686	0.0237162	0.341995	0.0237162	0.341995		abundance	146	146	lipids
pi_34:2	Sex	Female	SexFemale	-3.45309	0.573037	1.76376	0.0239678	0.341995	0.0239678	0.341995		abundance	146	146	lipids
pc_o-39:3	Sex	Female	SexFemale	-0.401092	0.573037	0.423483	0.0243536	0.341995	0.0243536	0.341995		abundance	146	146	lipids
lpi_18:0	Recovery	Recovered	RecoveryRecovered	-0.131896	0.448403	0.247427	0.0247844	0.341995	0.0247844	0.341995		abundance	146	146	lipids
ce_16:1	Sex	Female	SexFemale	-0.175144	0.573037	0.324297	0.0250102	0.341995	0.0250102	0.341995		abundance	146	146	lipids
ce_21:4	Recovery	Recovered	RecoveryRecovered	-0.832614	0.448403	0.56686	0.0262746	0.341995	0.0262746	0.341995		abundance	146	146	lipids
pc_37:5	Sex	Female	SexFemale	-0.304934	0.573037	0.387773	0.027134	0.341995	0.027134	0.341995		abundance	146	146	lipids
tg_58:9	Sex	Female	SexFemale	2.60512	0.573037	0.909126	0.0272796	0.341995	0.0272796	0.341995		abundance	146	146	lipids
tg_56:8	Sex	Female	SexFemale	2.56895	0.573037	0.894642	0.0275858	0.341995	0.0275858	0.341995		abundance	146	146	lipids
fa_22:0	Recovery	Recovered	RecoveryRecovered	-0.248378	0.448403	0.306277	0.027798	0.341995	0.027798	0.341995		abundance	146	146	lipids
fa_21:5	Recovery	Recovered	RecoveryRecovered	-0.0916831	0.448403	0.235283	0.0278532	0.341995	0.0278532	0.341995		abundance	146	146	lipids
fa_22:3;o2	Recovery	Recovered	RecoveryRecovered	-3.65383	0.448403	1.84753	0.0280493	0.341995	0.0280493	0.341995		abundance	146	146	lipids
nae_18:1	Recovery	Recovered	RecoveryRecovered	-0.307601	0.448403	0.335765	0.0281546	0.341995	0.0281546	0.341995		abundance	146	146	lipids
sm_41:9;o2	Sex	Female	SexFemale	0.0630601	0.573037	0.222214	0.0290668	0.34796	0.0290668	0.34796		abundance	146	146	lipids
pe_p-40:6	Recovery	Recovered	RecoveryRecovered	-0.031942	0.448403	0.210638	0.0311322	0.36736	0.0311322	0.36736		abundance	146	146	lipids
fa_22:1	Sex	Female	SexFemale	-0.326241	0.573037	0.414051	0.0332766	0.381351	0.0332766	0.381351		abundance	146	146	lipids
fa_13:0	Recovery	Recovered	RecoveryRecovered	-0.0974402	0.448403	0.248498	0.0344288	0.381351	0.0344288	0.381351		abundance	146	146	lipids
tg_50:7	Sex	Female	SexFemale	2.07222	0.573037	0.703516	0.035239	0.381351	0.035239	0.381351		abundance	146	146	lipids
pc_37:3	Sex	Female	SexFemale	-0.586758	0.573037	0.542236	0.0352973	0.381351	0.0352973	0.381351		abundance	146	146	lipids
sm_39:1;o2	Sex	Female	SexFemale	-0.435155	0.573037	0.47083	0.0356769	0.381351	0.0356769	0.381351		abundance	146	146	lipids
sm_31:1;o2	Recovery	Recovered	RecoveryRecovered	-0.485454	0.448403	0.435804	0.0358862	0.381351	0.0358862	0.381351		abundance	146	146	lipids
pc_o-39:3	Recovery	Recovered	RecoveryRecovered	-0.458324	0.448403	0.425284	0.0366746	0.381351	0.0366746	0.381351		abundance	146	146	lipids
sm_32:1;o2	Recovery	Recovered	RecoveryRecovered	-1.72519	0.448403	1.03045	0.0368445	0.381351	0.0368445	0.381351		abundance	146	146	lipids
fa_19:1	Sex	Female	SexFemale	-0.681223	0.573037	0.5931	0.0369847	0.381351	0.0369847	0.381351		abundance	146	146	lipids
tg_52:8	Sex	Female	SexFemale	2.14025	0.573037	0.74346	0.0374655	0.381351	0.0374655	0.381351		abundance	146	146	lipids
fa_18:3	Sex	Female	SexFemale	-1.16265	0.573037	0.825457	0.0375926	0.381351	0.0375926	0.381351		abundance	146	146	lipids
ps_38:4	Recovery	Recovered	RecoveryRecovered	-0.470379	0.448403	0.43443	0.0378581	0.381351	0.0378581	0.381351		abundance	146	146	lipids
tg_58:6	Sex	Female	SexFemale	3.1174	0.573037	1.22666	0.0401196	0.39241	0.0401196	0.39241		abundance	146	146	lipids
tg_52:2	Recovery	Recovered	RecoveryRecovered	2.66787	0.448403	1.07077	0.0403693	0.39241	0.0403693	0.39241		abundance	146	146	lipids
tg_60:8	Sex	Female	SexFemale	-0.128483	0.573037	0.332931	0.0403812	0.39241	0.0403812	0.39241		abundance	146	146	lipids
sm_42:3;o2	Recovery	Recovered	RecoveryRecovered	-0.169428	0.448403	0.295664	0.0428429	0.407632	0.0428429	0.407632		abundance	146	146	lipids
tg_54:7;o	Recovery	Recovered	RecoveryRecovered	-0.348712	0.448403	0.385723	0.0429346	0.407632	0.0429346	0.407632		abundance	146	146	lipids
dg_34:1	Recovery	Recovered	RecoveryRecovered	2.57353	0.448403	1.04196	0.0435843	0.409098	0.0435843	0.409098		abundance	146	146	lipids
tg_50:2	Recovery	Recovered	RecoveryRecovered	2.77047	0.448403	1.14718	0.0449807	0.417461	0.0449807	0.417461		abundance	146	146	lipids
tg_52:3	Recovery	Recovered	RecoveryRecovered	2.74406	0.448403	1.13828	0.0458868	0.421125	0.0458868	0.421125		abundance	146	146	lipids
fa_22:1	Recovery	Recovered	RecoveryRecovered	-0.393028	0.448403	0.415812	0.0468468	0.421125	0.0468468	0.421125		abundance	146	146	lipids
pe_p-36:3	Recovery	Recovered	RecoveryRecovered	-1.17093	0.448403	0.806252	0.0469943	0.421125	0.0469943	0.421125		abundance	146	146	lipids
dg_36:1	Recovery	Recovered	RecoveryRecovered	2.58383	0.448403	1.06664	0.0474148	0.421125	0.0474148	0.421125		abundance	146	146	lipids
tg_50:1	Recovery	Recovered	RecoveryRecovered	2.72073	0.448403	1.1473	0.049906	0.434156	0.049906	0.434156		abundance	146	146	lipids
ce_18:3	Sex	Female	SexFemale	-0.81947	0.573037	0.70227	0.0499331	0.434156	0.0499331	0.434156		abundance	146	146	lipids
sm_36:3;o2	Sex	Female	SexFemale	3.13301	0.573037	1.30378	0.0518337	0.442279	0.0518337	0.442279		abundance	146	146	lipids
tg_60:13	Recovery	Recovered	RecoveryRecovered	-0.0894258	0.448403	0.267655	0.0519383	0.442279	0.0519383	0.442279		abundance	146	146	lipids
sm_32:2;o2	Recovery	Recovered	RecoveryRecovered	-1.07614	0.448403	0.778319	0.0525398	0.442836	0.0525398	0.442836		abundance	146	146	lipids
tg_52:1	Recovery	Recovered	RecoveryRecovered	2.37055	0.448403	0.991574	0.0548773	0.454576	0.0548773	0.454576		abundance	146	146	lipids
sm_38:1;o2	Recovery	Recovered	RecoveryRecovered	0.0122205	0.448403	0.216251	0.0550334	0.454576	0.0550334	0.454576		abundance	146	146	lipids
tg_56:6	Sex	Female	SexFemale	2.87449	0.573037	1.19271	0.0558332	0.456616	0.0558332	0.456616		abundance	146	146	lipids
tg_55:4	Sex	Female	SexFemale	-0.106963	0.573037	0.348289	0.0566315	0.458604	0.0566315	0.458604		abundance	146	146	lipids
pi_32:1	Recovery	Recovered	RecoveryRecovered	1.82678	0.448403	0.717457	0.0573661	0.459987	0.0573661	0.459987		abundance	146	146	lipids
pc_37:2	Sex	Female	SexFemale	-1.21988	0.573037	0.937272	0.0582057	0.459987	0.0582057	0.459987		abundance	146	146	lipids
tg_51:1	Recovery	Recovered	RecoveryRecovered	2.06462	0.448403	0.851037	0.059977	0.459987	0.059977	0.459987		abundance	146	146	lipids
sm_35:1;o2	Recovery	Recovered	RecoveryRecovered	-0.915464	0.448403	0.717702	0.0601911	0.459987	0.0601911	0.459987		abundance	146	146	lipids
fa_18:4	Recovery	Recovered	RecoveryRecovered	-0.568977	0.448403	0.534523	0.0603862	0.459987	0.0603862	0.459987		abundance	146	146	lipids
pi_38:6	Recovery	Recovered	RecoveryRecovered	3.85934	0.448403	1.80246	0.0606458	0.459987	0.0606458	0.459987		abundance	146	146	lipids
tg_50:6	Sex	Female	SexFemale	2.3263	0.573037	0.925938	0.0607004	0.459987	0.0607004	0.459987		abundance	146	146	lipids
fa_17:1	Sex	Female	SexFemale	-0.658618	0.573037	0.650447	0.0615629	0.462159	0.0615629	0.462159		abundance	146	146	lipids
fahfa_28:3;o	Recovery	Recovered	RecoveryRecovered	-2.21471	0.448403	1.41679	0.0623734	0.462159	0.0623734	0.462159		abundance	146	146	lipids
tg_60:6	Sex	Female	SexFemale	-0.383145	0.573037	0.505921	0.0626656	0.462159	0.0626656	0.462159		abundance	146	146	lipids
tg_60:10	Recovery	Recovered	RecoveryRecovered	-0.362721	0.448403	0.43095	0.064403	0.464972	0.064403	0.464972		abundance	146	146	lipids
dg_52:1	Sex	Female	SexFemale	2.02078	0.573037	0.774266	0.0644838	0.464972	0.0644838	0.464972		abundance	146	146	lipids
nae_26:5	Sex	Female	SexFemale	3.13232	0.573037	1.37571	0.0650041	0.464972	0.0650041	0.464972		abundance	146	146	lipids
sm_30:1;o2	Recovery	Recovered	RecoveryRecovered	-0.697251	0.448403	0.613409	0.0652987	0.464972	0.0652987	0.464972		abundance	146	146	lipids
tg_54:3	Recovery	Recovered	RecoveryRecovered	2.29164	0.448403	0.993447	0.065932	0.465469	0.065932	0.465469		abundance	146	146	lipids
dg_32:0	Recovery	Recovered	RecoveryRecovered	1.71271	0.448403	0.682317	0.0670742	0.467082	0.0670742	0.467082		abundance	146	146	lipids
tg_55:2	Recovery	Recovered	RecoveryRecovered	-0.321859	0.448403	0.413442	0.0672914	0.467082	0.0672914	0.467082		abundance	146	146	lipids
ce_22:6	Sex	Female	SexFemale	2.34387	0.573037	0.962318	0.0683654	0.469814	0.0683654	0.469814		abundance	146	146	lipids
tg_51:2	Recovery	Recovered	RecoveryRecovered	2.10645	0.448403	0.903741	0.0694371	0.469814	0.0694371	0.469814		abundance	146	146	lipids
ce_18:4	Recovery	Recovered	RecoveryRecovered	-0.126754	0.448403	0.30932	0.0699618	0.469814	0.0699618	0.469814		abundance	146	146	lipids
pi_36:2	Recovery	Recovered	RecoveryRecovered	3.53253	0.448403	1.68917	0.0702141	0.469814	0.0702141	0.469814		abundance	146	146	lipids
tg_47:0	Sex	Female	SexFemale	0.167172	0.573037	0.215007	0.070529	0.469814	0.070529	0.469814		abundance	146	146	lipids
nae_17:0	Recovery	Recovered	RecoveryRecovered	0.0379148	0.448403	0.218131	0.0735439	0.484887	0.0735439	0.484887		abundance	146	146	lipids
pc_37:10	Recovery	Recovered	RecoveryRecovered	-0.0440116	0.448403	0.266441	0.0739658	0.484887	0.0739658	0.484887		abundance	146	146	lipids
tg_54:2	Recovery	Recovered	RecoveryRecovered	2.08144	0.448403	0.912134	0.0760621	0.494703	0.0760621	0.494703		abundance	146	146	lipids
cer_34:1;o2	Sex	Female	SexFemale	2.64185	0.573037	1.1603	0.0769768	0.496549	0.0769768	0.496549		abundance	146	146	lipids
tg_60:12	Sex	Female	SexFemale	1.24146	0.573037	0.371427	0.0776989	0.496549	0.0776989	0.496549		abundance	146	146	lipids
pc_39:6	Recovery	Recovered	RecoveryRecovered	-0.725084	0.448403	0.65926	0.0781493	0.496549	0.0781493	0.496549		abundance	146	146	lipids
tg_60:8	Recovery	Recovered	RecoveryRecovered	-0.151502	0.448403	0.334347	0.079597	0.501887	0.079597	0.501887		abundance	146	146	lipids
dg_38:6	Sex	Female	SexFemale	2.4322	0.573037	1.06553	0.0835625	0.513862	0.0835625	0.513862		abundance	146	146	lipids
tg_48:1	Recovery	Recovered	RecoveryRecovered	2.11043	0.448403	0.953485	0.0836126	0.513862	0.0836126	0.513862		abundance	146	146	lipids
tg_55:1	Sex	Female	SexFemale	-0.0583057	0.573037	0.357799	0.0849071	0.513862	0.0849071	0.513862		abundance	146	146	lipids
pc_38:6	Sex	Female	SexFemale	2.90585	0.573037	1.34557	0.0854276	0.513862	0.0854276	0.513862		abundance	146	146	lipids
pe_p-34:1	Recovery	Recovered	RecoveryRecovered	-0.557843	0.448403	0.578758	0.0858136	0.513862	0.0858136	0.513862		abundance	146	146	lipids
lpi_18:2	Recovery	Recovered	RecoveryRecovered	2.84485	0.448403	1.3875	0.0865872	0.513862	0.0865872	0.513862		abundance	146	146	lipids
cer_40:1;o2	Recovery	Recovered	RecoveryRecovered	2.19024	0.448403	1.00768	0.0866412	0.513862	0.0866412	0.513862		abundance	146	146	lipids
ce_18:1	Recovery	Recovered	RecoveryRecovered	2.18782	0.448403	1.00977	0.087553	0.513862	0.087553	0.513862		abundance	146	146	lipids
dg_30:2	Sex	Female	SexFemale	1.65435	0.573037	0.627812	0.0886777	0.513862	0.0886777	0.513862		abundance	146	146	lipids
pi_40:6	Recovery	Recovered	RecoveryRecovered	2.74306	0.448403	1.33939	0.0890343	0.513862	0.0890343	0.513862		abundance	146	146	lipids
pc_37:4	Sex	Female	SexFemale	-0.431298	0.573037	0.584101	0.0890521	0.513862	0.0890521	0.513862		abundance	146	146	lipids
sm_36:0;o2	Recovery	Recovered	RecoveryRecovered	-0.229096	0.448403	0.391005	0.0891008	0.513862	0.0891008	0.513862		abundance	146	146	lipids
tg_48:0	Recovery	Recovered	RecoveryRecovered	2.07937	0.448403	0.952709	0.0895837	0.513862	0.0895837	0.513862		abundance	146	146	lipids
fa_12:0	Sex	Female	SexFemale	0.115928	0.573037	0.264509	0.0938718	0.523257	0.0938718	0.523257		abundance	146	146	lipids
ce_20:5	Sex	Female	SexFemale	-0.41263	0.573037	0.581436	0.0938786	0.523257	0.0938786	0.523257		abundance	146	146	lipids
tg_60:11	Sex	Female	SexFemale	1.35312	0.573037	0.459211	0.0939606	0.523257	0.0939606	0.523257		abundance	146	146	lipids
lpi_18:1	Recovery	Recovered	RecoveryRecovered	1.92991	0.448403	0.878093	0.0942084	0.523257	0.0942084	0.523257		abundance	146	146	lipids
dg_o-34:1	Sex	Female	SexFemale	-0.127625	0.573037	0.411985	0.0946387	0.523257	0.0946387	0.523257		abundance	146	146	lipids
dg_38:4	Recovery	Recovered	RecoveryRecovered	-0.182026	0.448403	0.370286	0.095157	0.523257	0.095157	0.523257		abundance	146	146	lipids
fa_18:2;o2	Recovery	Recovered	RecoveryRecovered	-0.211177	0.448403	0.388407	0.0961167	0.523257	0.0961167	0.523257		abundance	146	146	lipids
fa_19:0	Recovery	Recovered	RecoveryRecovered	-0.473565	0.448403	0.546579	0.0962894	0.523257	0.0962894	0.523257		abundance	146	146	lipids
cer_34:0;o2	Sex	Female	SexFemale	2.88196	0.573037	1.38304	0.0976859	0.527376	0.0976859	0.527376		abundance	146	146	lipids
lpe_18:2	Recovery	Recovered	RecoveryRecovered	2.91183	0.448403	1.48515	0.0995941	0.534187	0.0995941	0.534187		abundance	146	146	lipids
tg_51:5	Recovery	Recovered	RecoveryRecovered	1.16114	0.448403	0.42823	0.10154	0.54111	0.10154	0.54111		abundance	146	146	lipids
pc_38:3	Recovery	Recovered	RecoveryRecovered	2.76134	0.448403	1.40891	0.103067	0.54477	0.103067	0.54477		abundance	146	146	lipids
tg_58:10	Sex	Female	SexFemale	1.51992	0.573037	0.57444	0.103546	0.54477	0.103546	0.54477		abundance	146	146	lipids
tg_51:3	Recovery	Recovered	RecoveryRecovered	1.98813	0.448403	0.942469	0.105393	0.550373	0.105393	0.550373		abundance	146	146	lipids
sm_35:1;o2	Sex	Female	SexFemale	-0.594938	0.573037	0.714663	0.10597	0.550373	0.10597	0.550373		abundance	146	146	lipids
pc_36:5	Recovery	Recovered	RecoveryRecovered	2.81854	0.448403	1.45853	0.10661	0.550373	0.10661	0.550373		abundance	146	146	lipids
pi_38:3	Recovery	Recovered	RecoveryRecovered	2.46702	0.448403	1.24655	0.107916	0.553655	0.107916	0.553655		abundance	146	146	lipids
dg_36:2	Recovery	Recovered	RecoveryRecovered	2.33641	0.448403	1.17175	0.109499	0.558308	0.109499	0.558308		abundance	146	146	lipids
pe_40:7	Recovery	Recovered	RecoveryRecovered	-0.0933162	0.448403	0.332473	0.111001	0.559909	0.111001	0.559909		abundance	146	146	lipids
dg_30:0	Recovery	Recovered	RecoveryRecovered	-0.101902	0.448403	0.340409	0.113582	0.559909	0.113582	0.559909		abundance	146	146	lipids
tg_52:7	Sex	Female	SexFemale	2.04941	0.573037	0.931482	0.115907	0.559909	0.115907	0.559909		abundance	146	146	lipids
tg_56:10	Recovery	Recovered	RecoveryRecovered	-0.0753986	0.448403	0.325979	0.11655	0.559909	0.11655	0.559909		abundance	146	146	lipids
pi_36:4	Recovery	Recovered	RecoveryRecovered	3.62413	0.448403	2.01168	0.116761	0.559909	0.116761	0.559909		abundance	146	146	lipids
dg_26:0	Recovery	Recovered	RecoveryRecovered	0.0796333	0.448403	0.225663	0.116904	0.559909	0.116904	0.559909		abundance	146	146	lipids
fa_21:5	Sex	Female	SexFemale	0.190105	0.573037	0.234287	0.116949	0.559909	0.116949	0.559909		abundance	146	146	lipids
tg_60:6	Recovery	Recovered	RecoveryRecovered	-0.354213	0.448403	0.508072	0.11795	0.559909	0.11795	0.559909		abundance	146	146	lipids
tg_52:5;o	Sex	Female	SexFemale	1.9896	0.573037	0.899397	0.118217	0.559909	0.118217	0.559909		abundance	146	146	lipids
fa_16:1;o2	Recovery	Recovered	RecoveryRecovered	-0.00951226	0.448403	0.28481	0.118506	0.559909	0.118506	0.559909		abundance	146	146	lipids
sm_44:6;o2	Sex	Female	SexFemale	0.205831	0.573037	0.227072	0.118826	0.559909	0.118826	0.559909		abundance	146	146	lipids
tg_60:7	Sex	Female	SexFemale	-0.453619	0.573037	0.653071	0.119208	0.559909	0.119208	0.559909		abundance	146	146	lipids
tg_62:12	Recovery	Recovered	RecoveryRecovered	-0.0106535	0.448403	0.285815	0.119617	0.559909	0.119617	0.559909		abundance	146	146	lipids
fa_20:5	Recovery	Recovered	RecoveryRecovered	0.0270603	0.448403	0.263001	0.119664	0.559909	0.119664	0.559909		abundance	146	146	lipids
tg_54:4	Recovery	Recovered	RecoveryRecovered	2.12174	0.448403	1.06818	0.119981	0.559909	0.119981	0.559909		abundance	146	146	lipids
tg_50:3	Recovery	Recovered	RecoveryRecovered	2.07312	0.448403	1.04296	0.121592	0.560055	0.121592	0.560055		abundance	146	146	lipids
tg_56:4	Sex	Female	SexFemale	2.26591	0.573037	1.09007	0.122949	0.560055	0.122949	0.560055		abundance	146	146	lipids
tg_60:11	Recovery	Recovered	RecoveryRecovered	-0.272453	0.448403	0.461164	0.123136	0.560055	0.123136	0.560055		abundance	146	146	lipids
fa_22:0	Sex	Female	SexFemale	0.090737	0.573037	0.30498	0.12323	0.560055	0.12323	0.560055		abundance	146	146	lipids
nae_22:5	Recovery	Recovered	RecoveryRecovered	0.0410856	0.448403	0.256334	0.123402	0.560055	0.123402	0.560055		abundance	146	146	lipids
fa_16:2	Recovery	Recovered	RecoveryRecovered	-0.911297	0.448403	0.879315	0.124305	0.560536	0.124305	0.560536		abundance	146	146	lipids
tg_56:5	Recovery	Recovered	RecoveryRecovered	-0.10097	0.448403	0.351714	0.125498	0.560536	0.125498	0.560536		abundance	146	146	lipids
fa_18:3	Recovery	Recovered	RecoveryRecovered	-0.832643	0.448403	0.828967	0.125544	0.560536	0.125544	0.560536		abundance	146	146	lipids
hexcer_34:1;o2	Sex	Female	SexFemale	2.92177	0.573037	1.53898	0.129365	0.567669	0.129365	0.567669		abundance	146	146	lipids
ce_16:0	Sex	Female	SexFemale	2.98841	0.573037	1.58669	0.130235	0.567669	0.130235	0.567669		abundance	146	146	lipids
tg_60:9	Recovery	Recovered	RecoveryRecovered	-0.153014	0.448403	0.391497	0.130839	0.567669	0.130839	0.567669		abundance	146	146	lipids
tg_54:5;o	Sex	Female	SexFemale	2.42825	0.573037	1.21987	0.130886	0.567669	0.130886	0.567669		abundance	146	146	lipids
nagly_24:3;o	Sex	Female	SexFemale	-0.557964	0.573037	0.743286	0.131052	0.567669	0.131052	0.567669		abundance	146	146	lipids
tg_53:2	Recovery	Recovered	RecoveryRecovered	1.82572	0.448403	0.906213	0.131265	0.567669	0.131265	0.567669		abundance	146	146	lipids
pc_39:0	Recovery	Recovered	RecoveryRecovered	0.165912	0.448403	0.176398	0.133256	0.569786	0.133256	0.569786		abundance	146	146	lipids
lpi_20:4	Sex	Female	SexFemale	3.33183	0.573037	1.83008	0.13397	0.569786	0.13397	0.569786		abundance	146	146	lipids
pc_34:1	Recovery	Recovered	RecoveryRecovered	2.58527	0.448403	1.41923	0.13444	0.569786	0.13444	0.569786		abundance	146	146	lipids
sm_40:5;o2	Sex	Female	SexFemale	-0.692735	0.573037	0.838742	0.134514	0.569786	0.134514	0.569786		abundance	146	146	lipids
tg_60:12	Recovery	Recovered	RecoveryRecovered	-0.117667	0.448403	0.373006	0.135366	0.570469	0.135366	0.570469		abundance	146	146	lipids
lpe_o-16:1	Sex	Female	SexFemale	2.10457	0.573037	1.02251	0.13691	0.572381	0.13691	0.572381		abundance	146	146	lipids
tg_54:1	Recovery	Recovered	RecoveryRecovered	1.78591	0.448403	0.894839	0.137582	0.572381	0.137582	0.572381		abundance	146	146	lipids
tg_60:1	Sex	Female	SexFemale	-0.340356	0.573037	0.610674	0.138699	0.572381	0.138699	0.572381		abundance	146	146	lipids
dg_38:5	Sex	Female	SexFemale	2.49263	0.573037	1.2911	0.139236	0.572381	0.139236	0.572381		abundance	146	146	lipids
lpc_22:6/0:0	Sex	Female	SexFemale	2.54652	0.573037	1.32649	0.139284	0.572381	0.139284	0.572381		abundance	146	146	lipids
sm_35:2;o2	Sex	Female	SexFemale	0.119567	0.573037	0.300809	0.140456	0.574338	0.140456	0.574338		abundance	146	146	lipids
pc_32:1	Sex	Female	SexFemale	-1.2221	0.573037	1.2168	0.142882	0.581381	0.142882	0.581381		abundance	146	146	lipids
ps_38:4	Sex	Female	SexFemale	-0.068824	0.573037	0.432591	0.143886	0.582599	0.143886	0.582599		abundance	146	146	lipids
pc_37:4	Recovery	Recovered	RecoveryRecovered	-0.415365	0.448403	0.586585	0.144774	0.583236	0.144774	0.583236		abundance	146	146	lipids
dg_36:3	Sex	Female	SexFemale	2.63691	0.573037	1.41081	0.146001	0.583236	0.146001	0.583236		abundance	146	146	lipids
tg_53:3	Recovery	Recovered	RecoveryRecovered	1.92496	0.448403	1.01221	0.147429	0.583236	0.147429	0.583236		abundance	146	146	lipids
pc_36:1	Recovery	Recovered	RecoveryRecovered	2.19844	0.448403	1.20081	0.147816	0.583236	0.147816	0.583236		abundance	146	146	lipids
sm_35:2;o2	Recovery	Recovered	RecoveryRecovered	-0.000826	0.448403	0.302088	0.148197	0.583236	0.148197	0.583236		abundance	146	146	lipids
car_12:0	Sex	Female	SexFemale	2.33464	0.573037	1.21298	0.148839	0.583236	0.148839	0.583236		abundance	146	146	lipids
pe_p-38:6	Sex	Female	SexFemale	2.41181	0.573037	1.26651	0.148986	0.583236	0.148986	0.583236		abundance	146	146	lipids
dg_36:1	Sex	Female	SexFemale	2.1087	0.573037	1.06212	0.150399	0.584942	0.150399	0.584942		abundance	146	146	lipids
pc_40:6	Sex	Female	SexFemale	2.47835	0.573037	1.32209	0.152043	0.584942	0.152043	0.584942		abundance	146	146	lipids
tg_60:7	Recovery	Recovered	RecoveryRecovered	-0.499201	0.448403	0.655848	0.152058	0.584942	0.152058	0.584942		abundance	146	146	lipids
fa_19:0	Sex	Female	SexFemale	-0.214809	0.573037	0.544265	0.152255	0.584942	0.152255	0.584942		abundance	146	146	lipids
fa_16:1	Sex	Female	SexFemale	-0.81639	0.573037	0.971265	0.15484	0.59212	0.15484	0.59212		abundance	146	146	lipids
lpc_15:0/0:0	Sex	Female	SexFemale	-0.0829226	0.573037	0.456858	0.156558	0.593645	0.156558	0.593645		abundance	146	146	lipids
tg_52:0	Recovery	Recovered	RecoveryRecovered	1.44617	0.448403	0.700041	0.157391	0.593645	0.157391	0.593645		abundance	146	146	lipids
fa_13:0	Sex	Female	SexFemale	0.211482	0.573037	0.247446	0.157973	0.593645	0.157973	0.593645		abundance	146	146	lipids
pc_36:5	Sex	Female	SexFemale	2.63329	0.573037	1.45235	0.158114	0.593645	0.158114	0.593645		abundance	146	146	lipids
tg_52:4;o	Recovery	Recovered	RecoveryRecovered	-0.7578	0.448403	0.850635	0.159356	0.594036	0.159356	0.594036		abundance	146	146	lipids
pi_34:1	Sex	Female	SexFemale	-1.42313	0.573037	1.41248	0.159656	0.594036	0.159656	0.594036		abundance	146	146	lipids
tg_48:3	Sex	Female	SexFemale	1.8823	0.573037	0.928185	0.161051	0.595388	0.161051	0.595388		abundance	146	146	lipids
lpi_18:0	Sex	Female	SexFemale	0.216754	0.573037	0.246379	0.162045	0.595388	0.162045	0.595388		abundance	146	146	lipids
tg_52:3	Sex	Female	SexFemale	2.16722	0.573037	1.13346	0.162182	0.595388	0.162182	0.595388		abundance	146	146	lipids
tg_48:2	Recovery	Recovered	RecoveryRecovered	1.83189	0.448403	0.989679	0.164661	0.600007	0.164661	0.600007		abundance	146	146	lipids
tg_54:4	Sex	Female	SexFemale	2.05868	0.573037	1.06366	0.164893	0.600007	0.164893	0.600007		abundance	146	146	lipids
tg_46:2	Sex	Female	SexFemale	1.69573	0.573037	0.807538	0.167794	0.600176	0.167794	0.600176		abundance	146	146	lipids
lpc_17:0/0:0	Sex	Female	SexFemale	-0.201562	0.573037	0.555683	0.167933	0.600176	0.167933	0.600176		abundance	146	146	lipids
sm_42:2;o2	Recovery	Recovered	RecoveryRecovered	-0.214047	0.448403	0.474937	0.168247	0.600176	0.168247	0.600176		abundance	146	146	lipids
tg_48:4	Sex	Female	SexFemale	1.77835	0.573037	0.869852	0.16903	0.600176	0.16903	0.600176		abundance	146	146	lipids
tg_54:3;o	Sex	Female	SexFemale	0.153758	0.573037	0.298401	0.169095	0.600176	0.169095	0.600176		abundance	146	146	lipids
tg_46:3	Sex	Female	SexFemale	1.70313	0.573037	0.816468	0.169299	0.600176	0.169299	0.600176		abundance	146	146	lipids
pc_o-41:11	Recovery	Recovered	RecoveryRecovered	1.91865	0.448403	1.07484	0.173881	0.61047	0.173881	0.61047		abundance	146	146	lipids
pe_o-40:11	Sex	Female	SexFemale	-0.0395575	0.573037	0.446822	0.175859	0.61047	0.175859	0.61047		abundance	146	146	lipids
spb_24:0;o2	Recovery	Recovered	RecoveryRecovered	-0.162263	0.448403	0.445554	0.176482	0.61047	0.176482	0.61047		abundance	146	146	lipids
lpc_18:2/0:0	Recovery	Recovered	RecoveryRecovered	2.63191	0.448403	1.6099	0.177169	0.61047	0.177169	0.61047		abundance	146	146	lipids
pc_39:6	Sex	Female	SexFemale	-0.317302	0.573037	0.656469	0.178709	0.61047	0.178709	0.61047		abundance	146	146	lipids
tg_39:0	Sex	Female	SexFemale	0.245955	0.573037	0.235087	0.180293	0.61047	0.180293	0.61047		abundance	146	146	lipids
fa_19:1	Recovery	Recovered	RecoveryRecovered	-0.357089	0.448403	0.595622	0.180395	0.61047	0.180395	0.61047		abundance	146	146	lipids
tg_59:2	Recovery	Recovered	RecoveryRecovered	-0.158918	0.448403	0.447397	0.180462	0.61047	0.180462	0.61047		abundance	146	146	lipids
fa_15:0	Recovery	Recovered	RecoveryRecovered	0.0558957	0.448403	0.286003	0.180648	0.61047	0.180648	0.61047		abundance	146	146	lipids
tg_49:4	Recovery	Recovered	RecoveryRecovered	0.974003	0.448403	0.386135	0.180961	0.61047	0.180961	0.61047		abundance	146	146	lipids
sm_42:1;o2	Recovery	Recovered	RecoveryRecovered	-1.28215	0.448403	1.28642	0.180998	0.61047	0.180998	0.61047		abundance	146	146	lipids
pc_36:6	Sex	Female	SexFemale	-0.536535	0.573037	0.824294	0.181072	0.61047	0.181072	0.61047		abundance	146	146	lipids
fa_15:0	Sex	Female	SexFemale	0.185835	0.573037	0.284792	0.184764	0.618808	0.184764	0.618808		abundance	146	146	lipids
sm_36:0;o2	Sex	Female	SexFemale	0.0508407	0.573037	0.389349	0.185728	0.618808	0.185728	0.618808		abundance	146	146	lipids
pc_32:1	Recovery	Recovered	RecoveryRecovered	2.07449	0.448403	1.22198	0.185792	0.618808	0.185792	0.618808		abundance	146	146	lipids
tg_58:11	Recovery	Recovered	RecoveryRecovered	-0.249735	0.448403	0.525704	0.188397	0.622312	0.188397	0.622312		abundance	146	146	lipids
tg_54:5	Sex	Female	SexFemale	1.87422	0.573037	0.984669	0.189104	0.622312	0.189104	0.622312		abundance	146	146	lipids
dg_36:3	Recovery	Recovered	RecoveryRecovered	2.31666	0.448403	1.41681	0.189619	0.622312	0.189619	0.622312		abundance	146	146	lipids
tg_46:0	Recovery	Recovered	RecoveryRecovered	1.46026	0.448403	0.768818	0.191158	0.622312	0.191158	0.622312		abundance	146	146	lipids
pi_40:4	Recovery	Recovered	RecoveryRecovered	1.44981	0.448403	0.760451	0.191732	0.622312	0.191732	0.622312		abundance	146	146	lipids
pc_o-34:3	Sex	Female	SexFemale	-0.398393	0.573037	0.739928	0.192078	0.622312	0.192078	0.622312		abundance	146	146	lipids
lpe_20:4	Recovery	Recovered	RecoveryRecovered	2.4388	0.448403	1.51999	0.192612	0.622312	0.192612	0.622312		abundance	146	146	lipids
lpc_18:1/0:0	Sex	Female	SexFemale	-0.612985	0.573037	0.905935	0.192872	0.622312	0.192872	0.622312		abundance	146	146	lipids
pc_o-34:2	Sex	Female	SexFemale	-0.0224737	0.573037	0.45382	0.195481	0.625245	0.195481	0.625245		abundance	146	146	lipids
fa_20:1	Recovery	Recovered	RecoveryRecovered	-0.729051	0.448403	0.904287	0.195899	0.625245	0.195899	0.625245		abundance	146	146	lipids
lpc_17:1/0:0	Recovery	Recovered	RecoveryRecovered	-0.0996331	0.448403	0.418889	0.196051	0.625245	0.196051	0.625245		abundance	146	146	lipids
pc_36:2	Recovery	Recovered	RecoveryRecovered	2.35141	0.448403	1.46746	0.197167	0.626386	0.197167	0.626386		abundance	146	146	lipids
tg_52:4	Sex	Female	SexFemale	1.85511	0.573037	0.993167	0.199449	0.629479	0.199449	0.629479		abundance	146	146	lipids
dg_36:2	Sex	Female	SexFemale	2.07695	0.573037	1.16679	0.199665	0.629479	0.199665	0.629479		abundance	146	146	lipids
ce_20:4	Recovery	Recovered	RecoveryRecovered	-0.754052	0.448403	0.935353	0.201003	0.631288	0.201003	0.631288		abundance	146	146	lipids
tg_60:1	Recovery	Recovered	RecoveryRecovered	-0.339729	0.448403	0.613271	0.20275	0.63436	0.20275	0.63436		abundance	146	146	lipids
dg_26:0	Sex	Female	SexFemale	0.276604	0.573037	0.224707	0.203584	0.634567	0.203584	0.634567		abundance	146	146	lipids
fa_14:1	Sex	Female	SexFemale	-0.325329	0.573037	0.708734	0.208243	0.644349	0.208243	0.644349		abundance	146	146	lipids
pc_40:7	Sex	Female	SexFemale	1.64325	0.573037	0.846356	0.208282	0.644349	0.208282	0.644349		abundance	146	146	lipids
pc_36:3	Recovery	Recovered	RecoveryRecovered	2.05625	0.448403	1.27491	0.209494	0.64568	0.209494	0.64568		abundance	146	146	lipids
dg_o-34:1	Recovery	Recovered	RecoveryRecovered	-0.0762892	0.448403	0.413737	0.210705	0.646997	0.210705	0.646997		abundance	146	146	lipids
nae_22:4	Recovery	Recovered	RecoveryRecovered	-0.109187	0.448403	0.443238	0.2133	0.649067	0.2133	0.649067		abundance	146	146	lipids
pe_38:6	Recovery	Recovered	RecoveryRecovered	-0.817184	0.448403	1.01187	0.21338	0.649067	0.21338	0.649067		abundance	146	146	lipids
tg_54:6	Sex	Female	SexFemale	1.67243	0.573037	0.878531	0.213736	0.649067	0.213736	0.649067		abundance	146	146	lipids
car_14:0	Sex	Female	SexFemale	2.11641	0.573037	1.23888	0.215201	0.65112	0.215201	0.65112		abundance	146	146	lipids
fa_16:2	Sex	Female	SexFemale	-0.516059	0.573037	0.875592	0.216174	0.651495	0.216174	0.651495		abundance	146	146	lipids
pc_o-42:6	Recovery	Recovered	RecoveryRecovered	-0.791405	0.448403	0.999995	0.21766	0.651495	0.21766	0.651495		abundance	146	146	lipids
nae_17:0	Sex	Female	SexFemale	0.29549	0.573037	0.217207	0.218373	0.651495	0.218373	0.651495		abundance	146	146	lipids
tg_48:5	Sex	Female	SexFemale	1.76456	0.573037	0.963097	0.218479	0.651495	0.218479	0.651495		abundance	146	146	lipids
tg_44:2	Sex	Female	SexFemale	1.26788	0.573037	0.563029	0.220858	0.652966	0.220858	0.652966		abundance	146	146	lipids
sm_43:2;o2	Sex	Female	SexFemale	0.101838	0.573037	0.379845	0.221374	0.652966	0.221374	0.652966		abundance	146	146	lipids
tg_56:4	Recovery	Recovered	RecoveryRecovered	1.78924	0.448403	1.09471	0.222819	0.652966	0.222819	0.652966		abundance	146	146	lipids
pi_36:3	Recovery	Recovered	RecoveryRecovered	1.84085	0.448403	1.13709	0.223344	0.652966	0.223344	0.652966		abundance	146	146	lipids
fa_20:4	Recovery	Recovered	RecoveryRecovered	-0.331144	0.448403	0.636091	0.223373	0.652966	0.223373	0.652966		abundance	146	146	lipids
dg_40:8	Sex	Female	SexFemale	1.01485	0.573037	0.356992	0.223847	0.652966	0.223847	0.652966		abundance	146	146	lipids
pc_40:5	Recovery	Recovered	RecoveryRecovered	1.90074	0.448403	1.18998	0.224507	0.652966	0.224507	0.652966		abundance	146	146	lipids
hexcer_34:1;o2	Recovery	Recovered	RecoveryRecovered	2.31317	0.448403	1.54552	0.229432	0.659252	0.229432	0.659252		abundance	146	146	lipids
pc_o-38:6	Recovery	Recovered	RecoveryRecovered	-0.200512	0.448403	0.53609	0.229527	0.659252	0.229527	0.659252		abundance	146	146	lipids
sm_34:1;o2	Sex	Female	SexFemale	2.54376	0.573037	1.63655	0.23027	0.659252	0.23027	0.659252		abundance	146	146	lipids
tg_52:1;o	Sex	Female	SexFemale	0.183094	0.573037	0.319564	0.231183	0.659252	0.231183	0.659252		abundance	146	146	lipids
car_10:0	Sex	Female	SexFemale	1.99061	0.573037	1.17965	0.231672	0.659252	0.231672	0.659252		abundance	146	146	lipids
lpc_18:1/0:0	Recovery	Recovered	RecoveryRecovered	1.54238	0.448403	0.909787	0.231907	0.659252	0.231907	0.659252		abundance	146	146	lipids
sm_43:4;o2	Recovery	Recovered	RecoveryRecovered	1.24713	0.448403	0.663334	0.232255	0.659252	0.232255	0.659252		abundance	146	146	lipids
tg_52:4	Recovery	Recovered	RecoveryRecovered	1.64176	0.448403	0.99739	0.233787	0.661329	0.233787	0.661329		abundance	146	146	lipids
lpc_22:6/0:0	Recovery	Recovered	RecoveryRecovered	2.0278	0.448403	1.33213	0.237668	0.670012	0.237668	0.670012		abundance	146	146	lipids
tg_42:2	Sex	Female	SexFemale	1.25366	0.573037	0.57603	0.241202	0.671906	0.241202	0.671906		abundance	146	146	lipids
tg_60:10	Sex	Female	SexFemale	1.08168	0.573037	0.429126	0.241949	0.671906	0.241949	0.671906		abundance	146	146	lipids
pc_40:4	Recovery	Recovered	RecoveryRecovered	2.01436	0.448403	1.3383	0.244025	0.671906	0.244025	0.671906		abundance	146	146	lipids
fa_16:3	Recovery	Recovered	RecoveryRecovered	-0.444837	0.448403	0.762388	0.244313	0.671906	0.244313	0.671906		abundance	146	146	lipids
tg_54:3	Sex	Female	SexFemale	1.72953	0.573037	0.98924	0.244664	0.671906	0.244664	0.671906		abundance	146	146	lipids
tg_54:5	Recovery	Recovered	RecoveryRecovered	1.5992	0.448403	0.988856	0.246992	0.671906	0.246992	0.671906		abundance	146	146	lipids
tg_49:3	Recovery	Recovered	RecoveryRecovered	1.36744	0.448403	0.788964	0.247409	0.671906	0.247409	0.671906		abundance	146	146	lipids
sm_40:2;o2	Recovery	Recovered	RecoveryRecovered	-0.486516	0.448403	0.804811	0.247826	0.671906	0.247826	0.671906		abundance	146	146	lipids
dg_38:4	Sex	Female	SexFemale	0.141775	0.573037	0.368719	0.248466	0.671906	0.248466	0.671906		abundance	146	146	lipids
fa_17:0	Recovery	Recovered	RecoveryRecovered	-0.301691	0.448403	0.646157	0.248965	0.671906	0.248965	0.671906		abundance	146	146	lipids
tg_58:10	Recovery	Recovered	RecoveryRecovered	-0.221909	0.448403	0.576882	0.248974	0.671906	0.248974	0.671906		abundance	146	146	lipids
ba_24:1;o3;t	Recovery	Recovered	RecoveryRecovered	-0.380811	0.448403	0.716101	0.249682	0.671906	0.249682	0.671906		abundance	146	146	lipids
dg_34:1	Sex	Female	SexFemale	1.77086	0.573037	1.03755	0.250862	0.671906	0.250862	0.671906		abundance	146	146	lipids
ps_36:1	Sex	Female	SexFemale	0.0532565	0.573037	0.449141	0.251275	0.671906	0.251275	0.671906		abundance	146	146	lipids
tg_49:1	Sex	Female	SexFemale	1.08415	0.573037	0.443813	0.254964	0.671906	0.254964	0.671906		abundance	146	146	lipids
pc_o-37:10	Recovery	Recovered	RecoveryRecovered	-0.428855	0.448403	0.76538	0.255135	0.671906	0.255135	0.671906		abundance	146	146	lipids
st_29:1;o;s	Sex	Female	SexFemale	-0.301018	0.573037	0.765179	0.255748	0.671906	0.255748	0.671906		abundance	146	146	lipids
sm_32:2;o2	Sex	Female	SexFemale	-0.3107	0.573037	0.775023	0.256227	0.671906	0.256227	0.671906		abundance	146	146	lipids
tg_56:1	Sex	Female	SexFemale	1.39201	0.573037	0.715998	0.256291	0.671906	0.256291	0.671906		abundance	146	146	lipids
pi_38:5	Recovery	Recovered	RecoveryRecovered	1.59629	0.448403	1.00747	0.256799	0.671906	0.256799	0.671906		abundance	146	146	lipids
tg_49:0	Recovery	Recovered	RecoveryRecovered	1.19852	0.448403	0.655967	0.257167	0.671906	0.257167	0.671906		abundance	146	146	lipids
pc_32:0	Sex	Female	SexFemale	2.08215	0.573037	1.32779	0.257494	0.671906	0.257494	0.671906		abundance	146	146	lipids
tg_46:2	Recovery	Recovered	RecoveryRecovered	1.37097	0.448403	0.810972	0.257771	0.671906	0.257771	0.671906		abundance	146	146	lipids
cer_41:1;o2	Sex	Female	SexFemale	-0.424884	0.573037	0.877221	0.257862	0.671906	0.257862	0.671906		abundance	146	146	lipids
tg_54:9	Recovery	Recovered	RecoveryRecovered	-0.202748	0.448403	0.574002	0.260794	0.676763	0.260794	0.676763		abundance	146	146	lipids
tg_50:5	Sex	Female	SexFemale	1.70703	0.573037	1.00857	0.263203	0.676763	0.263203	0.676763		abundance	146	146	lipids
pe_p-36:4	Sex	Female	SexFemale	2.10306	0.573037	1.36223	0.263309	0.676763	0.263309	0.676763		abundance	146	146	lipids
pc_o-32:1	Sex	Female	SexFemale	-0.949995	0.573037	1.35642	0.263707	0.676763	0.263707	0.676763		abundance	146	146	lipids
sm_44:6;o2	Recovery	Recovered	RecoveryRecovered	0.184747	0.448403	0.228038	0.263823	0.676763	0.263823	0.676763		abundance	146	146	lipids
st_27:1;o;s	Recovery	Recovered	RecoveryRecovered	1.95511	0.448403	1.35364	0.267644	0.681029	0.267644	0.681029		abundance	146	146	lipids
ba_24:1;o4;g;s	Sex	Female	SexFemale	1.56646	0.573037	0.89188	0.267823	0.681029	0.267823	0.681029		abundance	146	146	lipids
ce_20:3	Sex	Female	SexFemale	1.30305	0.573037	0.654626	0.267959	0.681029	0.267959	0.681029		abundance	146	146	lipids
tg_58:2	Sex	Female	SexFemale	1.44429	0.573037	0.785642	0.270018	0.684155	0.270018	0.684155		abundance	146	146	lipids
pi_35:2	Recovery	Recovered	RecoveryRecovered	1.23077	0.448403	0.709904	0.2735	0.687029	0.2735	0.687029		abundance	146	146	lipids
tg_53:1	Recovery	Recovered	RecoveryRecovered	1.10476	0.448403	0.595018	0.273615	0.687029	0.273615	0.687029		abundance	146	146	lipids
tg_58:5	Sex	Female	SexFemale	1.56993	0.573037	0.905813	0.273747	0.687029	0.273747	0.687029		abundance	146	146	lipids
tg_54:4;o	Sex	Female	SexFemale	0.323054	0.573037	0.220577	0.274599	0.687029	0.274599	0.687029		abundance	146	146	lipids
fa_26:0;o	Sex	Female	SexFemale	-0.386038	0.573037	0.875169	0.275609	0.687029	0.275609	0.687029		abundance	146	146	lipids
pe_p-34:2	Recovery	Recovered	RecoveryRecovered	1.94066	0.448403	1.3659	0.276519	0.687029	0.276519	0.687029		abundance	146	146	lipids
pe_p-36:2	Recovery	Recovered	RecoveryRecovered	1.49934	0.448403	0.962312	0.276974	0.687029	0.276974	0.687029		abundance	146	146	lipids
sm_38:2;o2	Recovery	Recovered	RecoveryRecovered	-0.562666	0.448403	0.930006	0.279045	0.690092	0.279045	0.690092		abundance	146	146	lipids
pc_38:4	Sex	Female	SexFemale	1.91953	0.573037	1.24163	0.280444	0.691482	0.280444	0.691482		abundance	146	146	lipids
sm_33:1;o2	Recovery	Recovered	RecoveryRecovered	0.0377644	0.448403	0.376707	0.282502	0.692735	0.282502	0.692735		abundance	146	146	lipids
tg_52:3;o	Recovery	Recovered	RecoveryRecovered	0.0762511	0.448403	0.341722	0.283053	0.692735	0.283053	0.692735		abundance	146	146	lipids
tg_46:4	Sex	Female	SexFemale	1.12981	0.573037	0.515166	0.283468	0.692735	0.283468	0.692735		abundance	146	146	lipids
tg_43:2	Recovery	Recovered	RecoveryRecovered	0.949988	0.448403	0.464148	0.286207	0.694793	0.286207	0.694793		abundance	146	146	lipids
tg_62:13	Sex	Female	SexFemale	0.8895	0.573037	0.289826	0.286537	0.694793	0.286537	0.694793		abundance	146	146	lipids
fa_17:0	Sex	Female	SexFemale	-0.116102	0.573037	0.643421	0.286833	0.694793	0.286833	0.694793		abundance	146	146	lipids
fa_20:2	Recovery	Recovered	RecoveryRecovered	-0.848048	0.448403	1.21968	0.289555	0.696855	0.289555	0.696855		abundance	146	146	lipids
tg_52:4;o	Sex	Female	SexFemale	-0.328967	0.573037	0.847034	0.28967	0.696855	0.28967	0.696855		abundance	146	146	lipids
tg_48:3	Recovery	Recovered	RecoveryRecovered	1.43812	0.448403	0.932132	0.290939	0.696855	0.290939	0.696855		abundance	146	146	lipids
dg_24:0	Recovery	Recovered	RecoveryRecovered	0.121196	0.448403	0.304591	0.291915	0.696855	0.291915	0.696855		abundance	146	146	lipids
fa_14:0	Recovery	Recovered	RecoveryRecovered	-0.563141	0.448403	0.956504	0.29254	0.696855	0.29254	0.696855		abundance	146	146	lipids
sm_40:5;o2	Recovery	Recovered	RecoveryRecovered	-0.442305	0.448403	0.842308	0.292747	0.696855	0.292747	0.696855		abundance	146	146	lipids
tg_60:5	Sex	Female	SexFemale	1.16915	0.573037	0.568577	0.297419	0.705942	0.297419	0.705942		abundance	146	146	lipids
pc_32:2	Sex	Female	SexFemale	-0.712906	0.573037	1.23602	0.299691	0.709298	0.299691	0.709298		abundance	146	146	lipids
tg_58:3	Sex	Female	SexFemale	1.341	0.573037	0.737405	0.300609	0.709438	0.300609	0.709438		abundance	146	146	lipids
fa_22:2	Recovery	Recovered	RecoveryRecovered	-0.693621	0.448403	1.10796	0.305135	0.71686	0.305135	0.71686		abundance	146	146	lipids
tg_50:2	Sex	Female	SexFemale	1.74795	0.573037	1.14232	0.30549	0.71686	0.30549	0.71686		abundance	146	146	lipids
dg_52:1	Recovery	Recovered	RecoveryRecovered	1.2443	0.448403	0.777558	0.30825	0.7198	0.30825	0.7198		abundance	146	146	lipids
pc_o-36:5	Recovery	Recovered	RecoveryRecovered	-0.623233	0.448403	1.05028	0.309409	0.7198	0.309409	0.7198		abundance	146	146	lipids
fa_20:1	Sex	Female	SexFemale	-0.344007	0.573037	0.900458	0.310134	0.7198	0.310134	0.7198		abundance	146	146	lipids
tg_46:3	Recovery	Recovered	RecoveryRecovered	1.28247	0.448403	0.81994	0.311556	0.7198	0.311556	0.7198		abundance	146	146	lipids
tg_42:0	Sex	Female	SexFemale	1.08009	0.573037	0.496529	0.311948	0.7198	0.311948	0.7198		abundance	146	146	lipids
pc_o-37:10	Sex	Female	SexFemale	1.34497	0.573037	0.76214	0.31374	0.7198	0.31374	0.7198		abundance	146	146	lipids
tg_58:6	Recovery	Recovered	RecoveryRecovered	1.6926	0.448403	1.23187	0.31427	0.7198	0.31427	0.7198		abundance	146	146	lipids
tg_40:2	Sex	Female	SexFemale	1.11162	0.573037	0.53269	0.315913	0.7198	0.315913	0.7198		abundance	146	146	lipids
tg_47:2	Recovery	Recovered	RecoveryRecovered	1.20259	0.448403	0.749569	0.316445	0.7198	0.316445	0.7198		abundance	146	146	lipids
pc_37:5	Recovery	Recovered	RecoveryRecovered	0.0537241	0.448403	0.389422	0.317128	0.7198	0.317128	0.7198		abundance	146	146	lipids
fa_24:6	Recovery	Recovered	RecoveryRecovered	-0.0573567	0.448403	0.501447	0.317212	0.7198	0.317212	0.7198		abundance	146	146	lipids
sm_39:1;o2	Recovery	Recovered	RecoveryRecovered	-0.0296825	0.448403	0.472832	0.317274	0.7198	0.317274	0.7198		abundance	146	146	lipids
pc_o-38:8	Recovery	Recovered	RecoveryRecovered	-0.533415	0.448403	0.980394	0.318386	0.7198	0.318386	0.7198		abundance	146	146	lipids
tg_50:3	Sex	Female	SexFemale	1.6113	0.573037	1.03855	0.319207	0.7198	0.319207	0.7198		abundance	146	146	lipids
tg_44:3	Sex	Female	SexFemale	1.14637	0.573037	0.571841	0.319814	0.7198	0.319814	0.7198		abundance	146	146	lipids
lpc_o-16:1	Recovery	Recovered	RecoveryRecovered	-0.305372	0.448403	0.757159	0.321694	0.720178	0.321694	0.720178		abundance	146	146	lipids
lpc_20:1/0:0	Recovery	Recovered	RecoveryRecovered	-0.458492	0.448403	0.914609	0.32314	0.720178	0.32314	0.720178		abundance	146	146	lipids
tg_41:1	Recovery	Recovered	RecoveryRecovered	0.999124	0.448403	0.55397	0.324847	0.720178	0.324847	0.720178		abundance	146	146	lipids
tg_56:6	Recovery	Recovered	RecoveryRecovered	1.62967	0.448403	1.19778	0.325802	0.720178	0.325802	0.720178		abundance	146	146	lipids
fa_16:3	Sex	Female	SexFemale	-0.175432	0.573037	0.75916	0.32594	0.720178	0.32594	0.720178		abundance	146	146	lipids
lpc_16:0/0:0	Recovery	Recovered	RecoveryRecovered	1.76714	0.448403	1.33836	0.326038	0.720178	0.326038	0.720178		abundance	146	146	lipids
pe_40:6	Sex	Female	SexFemale	1.27878	0.573037	0.715847	0.326904	0.720178	0.326904	0.720178		abundance	146	146	lipids
cer_34:1;o2	Recovery	Recovered	RecoveryRecovered	1.59224	0.448403	1.16523	0.327833	0.720178	0.327833	0.720178		abundance	146	146	lipids
car_10:0	Recovery	Recovered	RecoveryRecovered	1.61126	0.448403	1.18467	0.328154	0.720178	0.328154	0.720178		abundance	146	146	lipids
dg_38:7	Recovery	Recovered	RecoveryRecovered	0.0985425	0.448403	0.354052	0.328701	0.720178	0.328701	0.720178		abundance	146	146	lipids
cer_43:1;o2	Recovery	Recovered	RecoveryRecovered	-0.154238	0.448403	0.61803	0.332066	0.725626	0.332066	0.725626		abundance	146	146	lipids
tg_48:2	Sex	Female	SexFemale	1.52707	0.573037	0.985488	0.334898	0.729883	0.334898	0.729883		abundance	146	146	lipids
pc_o-38:4	Sex	Female	SexFemale	-0.432716	0.573037	1.04338	0.336467	0.730464	0.336467	0.730464		abundance	146	146	lipids
pe_p-36:1	Sex	Female	SexFemale	1.67217	0.573037	1.14154	0.337399	0.730464	0.337399	0.730464		abundance	146	146	lipids
st_29:1;o	Sex	Female	SexFemale	0.132545	0.573037	0.455869	0.338618	0.730464	0.338618	0.730464		abundance	146	146	lipids
pc_34:2	Recovery	Recovered	RecoveryRecovered	1.88823	0.448403	1.49978	0.338702	0.730464	0.338702	0.730464		abundance	146	146	lipids
tg_32:0	Recovery	Recovered	RecoveryRecovered	0.163657	0.448403	0.291753	0.340275	0.731947	0.340275	0.731947		abundance	146	146	lipids
pc_o-35:6	Recovery	Recovered	RecoveryRecovered	-0.239326	0.448403	0.718517	0.341198	0.732024	0.341198	0.732024		abundance	146	146	lipids
st_29:1;o;s	Recovery	Recovered	RecoveryRecovered	-0.284895	0.448403	0.768433	0.342503	0.732921	0.342503	0.732921		abundance	146	146	lipids
pi_32:0	Recovery	Recovered	RecoveryRecovered	1.61319	0.448403	1.22924	0.344953	0.736256	0.344953	0.736256		abundance	146	146	lipids
tg_47:1	Recovery	Recovered	RecoveryRecovered	1.05823	0.448403	0.644309	0.346973	0.738658	0.346973	0.738658		abundance	146	146	lipids
tg_50:1	Sex	Female	SexFemale	1.64261	0.573037	1.14244	0.350753	0.739226	0.350753	0.739226		abundance	146	146	lipids
lpc_18:0/0:0	Recovery	Recovered	RecoveryRecovered	1.3662	0.448403	0.981669	0.352187	0.739226	0.352187	0.739226		abundance	146	146	lipids
pe_p-40:7	Recovery	Recovered	RecoveryRecovered	-0.263539	0.448403	0.764044	0.353737	0.739226	0.353737	0.739226		abundance	146	146	lipids
dg_36:4	Sex	Female	SexFemale	1.52242	0.573037	1.02003	0.353969	0.739226	0.353969	0.739226		abundance	146	146	lipids
sm_43:4;o2	Sex	Female	SexFemale	1.18709	0.573037	0.660526	0.354969	0.739226	0.354969	0.739226		abundance	146	146	lipids
pi_37:4	Sex	Female	SexFemale	0.00136102	0.573037	0.613944	0.35526	0.739226	0.35526	0.739226		abundance	146	146	lipids
sm_41:1;o2	Recovery	Recovered	RecoveryRecovered	1.15868	0.448403	0.765254	0.355916	0.739226	0.355916	0.739226		abundance	146	146	lipids
tg_40:2	Recovery	Recovered	RecoveryRecovered	0.945951	0.448403	0.534955	0.355993	0.739226	0.355993	0.739226		abundance	146	146	lipids
pi_40:4	Sex	Female	SexFemale	-0.126934	0.573037	0.757231	0.357162	0.739226	0.357162	0.739226		abundance	146	146	lipids
sm_43:2;o2	Recovery	Recovered	RecoveryRecovered	0.0937486	0.448403	0.38146	0.358455	0.739226	0.358455	0.739226		abundance	146	146	lipids
pi_40:5	Recovery	Recovered	RecoveryRecovered	1.02083	0.448403	0.621114	0.358967	0.739226	0.358967	0.739226		abundance	146	146	lipids
fahfa_24:3;o	Sex	Female	SexFemale	1.8552	0.573037	1.39541	0.359557	0.739226	0.359557	0.739226		abundance	146	146	lipids
pc_o-36:5	Sex	Female	SexFemale	-0.384992	0.573037	1.04583	0.361333	0.739226	0.361333	0.739226		abundance	146	146	lipids
tg_56:3	Sex	Female	SexFemale	1.35295	0.573037	0.851896	0.3618	0.739226	0.3618	0.739226		abundance	146	146	lipids
sm_38:2;o2	Sex	Female	SexFemale	-0.273989	0.573037	0.926068	0.362239	0.739226	0.362239	0.739226		abundance	146	146	lipids
tg_50:0	Recovery	Recovered	RecoveryRecovered	1.05615	0.448403	0.663658	0.362751	0.739226	0.362751	0.739226		abundance	146	146	lipids
fa_22:4	Recovery	Recovered	RecoveryRecovered	-0.606893	0.448403	1.15868	0.363808	0.739226	0.363808	0.739226		abundance	146	146	lipids
tg_54:4;o	Recovery	Recovered	RecoveryRecovered	0.23961	0.448403	0.221515	0.36405	0.739226	0.36405	0.739226		abundance	146	146	lipids
fa_17:1	Recovery	Recovered	RecoveryRecovered	-0.147891	0.448403	0.653213	0.364243	0.739226	0.364243	0.739226		abundance	146	146	lipids
cer_40:1;o2	Sex	Female	SexFemale	-0.338243	0.573037	1.00341	0.365294	0.739541	0.365294	0.739541		abundance	146	146	lipids
pc_o-41:5	Sex	Female	SexFemale	0.1025	0.573037	0.51791	0.367385	0.74146	0.367385	0.74146		abundance	146	146	lipids
lpc_22:4/0:0	Recovery	Recovered	RecoveryRecovered	1.39722	0.448403	1.04962	0.368037	0.74146	0.368037	0.74146		abundance	146	146	lipids
sm_40:2;o2	Sex	Female	SexFemale	-0.147364	0.573037	0.801404	0.370457	0.742167	0.370457	0.742167		abundance	146	146	lipids
tg_60:2	Sex	Female	SexFemale	1.24751	0.573037	0.751528	0.371366	0.742167	0.371366	0.742167		abundance	146	146	lipids
pc_o-38:5	Sex	Female	SexFemale	-0.433917	0.573037	1.1272	0.373103	0.742167	0.373103	0.742167		abundance	146	146	lipids
dg_32:0	Sex	Female	SexFemale	1.18135	0.573037	0.679428	0.373586	0.742167	0.373586	0.742167		abundance	146	146	lipids
car_12:0	Recovery	Recovered	RecoveryRecovered	1.53509	0.448403	1.21814	0.373778	0.742167	0.373778	0.742167		abundance	146	146	lipids
tg_42:2	Recovery	Recovered	RecoveryRecovered	0.966948	0.448403	0.578479	0.373779	0.742167	0.373779	0.742167		abundance	146	146	lipids
tg_44:2	Recovery	Recovered	RecoveryRecovered	0.951518	0.448403	0.565423	0.376195	0.745173	0.376195	0.745173		abundance	146	146	lipids
lpc_22:4/0:0	Sex	Female	SexFemale	-0.350605	0.573037	1.04518	0.378317	0.747583	0.378317	0.747583		abundance	146	146	lipids
pc_37:10	Sex	Female	SexFemale	0.335537	0.573037	0.265313	0.380863	0.749492	0.380863	0.749492		abundance	146	146	lipids
fa_24:4	Recovery	Recovered	RecoveryRecovered	-0.941638	0.448403	1.5943	0.384662	0.749492	0.384662	0.749492		abundance	146	146	lipids
tg_40:1	Recovery	Recovered	RecoveryRecovered	0.891094	0.448403	0.505786	0.384837	0.749492	0.384837	0.749492		abundance	146	146	lipids
tg_46:1	Recovery	Recovered	RecoveryRecovered	0.895887	0.448403	0.512413	0.384888	0.749492	0.384888	0.749492		abundance	146	146	lipids
pc_o-36:2	Recovery	Recovered	RecoveryRecovered	-0.158437	0.448403	0.695267	0.385102	0.749492	0.385102	0.749492		abundance	146	146	lipids
hexcer_36:3;o3	Recovery	Recovered	RecoveryRecovered	-0.750073	0.448403	1.37904	0.386086	0.749492	0.386086	0.749492		abundance	146	146	lipids
cer_34:0;o2	Recovery	Recovered	RecoveryRecovered	1.65177	0.448403	1.38892	0.387458	0.749492	0.387458	0.749492		abundance	146	146	lipids
dg_52:2	Recovery	Recovered	RecoveryRecovered	1.4077	0.448403	1.10771	0.387908	0.749492	0.387908	0.749492		abundance	146	146	lipids
tg_51:4	Recovery	Recovered	RecoveryRecovered	1.23962	0.448403	0.914276	0.388706	0.749492	0.388706	0.749492		abundance	146	146	lipids
sm_28:1;o2	Recovery	Recovered	RecoveryRecovered	-0.174211	0.448403	0.7196	0.388909	0.749492	0.388909	0.749492		abundance	146	146	lipids
tg_60:9	Sex	Female	SexFemale	0.234234	0.573037	0.389839	0.389345	0.749492	0.389345	0.749492		abundance	146	146	lipids
tg_44:1	Sex	Female	SexFemale	1.01503	0.573037	0.510913	0.390171	0.749492	0.390171	0.749492		abundance	146	146	lipids
fa_24:6	Sex	Female	SexFemale	0.142765	0.573037	0.499324	0.391878	0.749847	0.391878	0.749847		abundance	146	146	lipids
ce_20:5	Recovery	Recovered	RecoveryRecovered	-0.0539968	0.448403	0.583909	0.392172	0.749847	0.392172	0.749847		abundance	146	146	lipids
ce_22:6	Recovery	Recovered	RecoveryRecovered	-0.376717	0.448403	0.966411	0.394905	0.75333	0.394905	0.75333		abundance	146	146	lipids
tg_56:9	Sex	Female	SexFemale	1.29024	0.573037	0.843631	0.396941	0.754946	0.396941	0.754946		abundance	146	146	lipids
car_16:0	Sex	Female	SexFemale	1.79141	0.573037	1.43998	0.398543	0.754946	0.398543	0.754946		abundance	146	146	lipids
tg_57:1	Recovery	Recovered	RecoveryRecovered	0.162818	0.448403	0.335557	0.401476	0.754946	0.401476	0.754946		abundance	146	146	lipids
fa_10:0	Recovery	Recovered	RecoveryRecovered	0.196259	0.448403	0.294705	0.401622	0.754946	0.401622	0.754946		abundance	146	146	lipids
pc_36:4	Sex	Female	SexFemale	1.54308	0.573037	1.15516	0.40229	0.754946	0.40229	0.754946		abundance	146	146	lipids
pc_o-38:8	Sex	Female	SexFemale	-0.247141	0.573037	0.976243	0.402522	0.754946	0.402522	0.754946		abundance	146	146	lipids
fa_20:0	Recovery	Recovered	RecoveryRecovered	0.151313	0.448403	0.349721	0.402682	0.754946	0.402682	0.754946		abundance	146	146	lipids
tg_54:2	Sex	Female	SexFemale	1.33375	0.573037	0.908271	0.403634	0.754946	0.403634	0.754946		abundance	146	146	lipids
sm_30:1;o2	Sex	Female	SexFemale	0.0603411	0.573037	0.610811	0.403978	0.754946	0.403978	0.754946		abundance	146	146	lipids
pi_40:6	Sex	Female	SexFemale	1.68543	0.573037	1.33372	0.405351	0.7558	0.405351	0.7558		abundance	146	146	lipids
st_24:1;o4	Sex	Female	SexFemale	1.04467	0.573037	0.564767	0.406605	0.756432	0.406605	0.756432		abundance	146	146	lipids
st_24:1;o4	Recovery	Recovered	RecoveryRecovered	-0.0258508	0.448403	0.567168	0.40777	0.756895	0.40777	0.756895		abundance	146	146	lipids
fa_18:1	Sex	Female	SexFemale	-0.385663	0.573037	1.16263	0.410643	0.75724	0.410643	0.75724		abundance	146	146	lipids
pc_o-38:6	Sex	Female	SexFemale	0.132421	0.573037	0.53382	0.411395	0.75724	0.411395	0.75724		abundance	146	146	lipids
sm_36:2;o2	Sex	Female	SexFemale	1.55067	0.573037	1.18744	0.411784	0.75724	0.411784	0.75724		abundance	146	146	lipids
tg_49:0	Sex	Female	SexFemale	0.0338107	0.573037	0.65319	0.41208	0.75724	0.41208	0.75724		abundance	146	146	lipids
tg_52:5	Recovery	Recovered	RecoveryRecovered	1.24345	0.448403	0.967192	0.41254	0.75724	0.41254	0.75724		abundance	146	146	lipids
tg_45:2	Recovery	Recovered	RecoveryRecovered	0.933796	0.448403	0.590949	0.413504	0.757326	0.413504	0.757326		abundance	146	146	lipids
tg_50:4	Sex	Female	SexFemale	1.38297	0.573037	0.991963	0.415202	0.757363	0.415202	0.757363		abundance	146	146	lipids
nae_22:5	Sex	Female	SexFemale	0.359973	0.573037	0.255249	0.416296	0.757363	0.416296	0.757363		abundance	146	146	lipids
tg_40:0	Sex	Female	SexFemale	0.884066	0.573037	0.378401	0.416637	0.757363	0.416637	0.757363		abundance	146	146	lipids
ce_18:1	Sex	Female	SexFemale	1.39098	0.573037	1.0055	0.417259	0.757363	0.417259	0.757363		abundance	146	146	lipids
tg_44:0	Recovery	Recovered	RecoveryRecovered	0.865062	0.448403	0.513064	0.419635	0.757363	0.419635	0.757363		abundance	146	146	lipids
sm_45:5;o2	Sex	Female	SexFemale	0.369798	0.573037	0.245304	0.419939	0.757363	0.419939	0.757363		abundance	146	146	lipids
cer_42:1;o2	Sex	Female	SexFemale	1.30136	0.573037	0.901178	0.420402	0.757363	0.420402	0.757363		abundance	146	146	lipids
pe_34:1	Recovery	Recovered	RecoveryRecovered	0.045324	0.448403	0.498346	0.421766	0.757363	0.421766	0.757363		abundance	146	146	lipids
tg_57:1	Sex	Female	SexFemale	0.300087	0.573037	0.334137	0.421776	0.757363	0.421776	0.757363		abundance	146	146	lipids
ce_18:2	Recovery	Recovered	RecoveryRecovered	1.46194	0.448403	1.27115	0.426261	0.761555	0.426261	0.761555		abundance	146	146	lipids
tg_45:0	Sex	Female	SexFemale	0.175221	0.573037	0.497747	0.42815	0.761555	0.42815	0.761555		abundance	146	146	lipids
tg_54:5;o	Recovery	Recovered	RecoveryRecovered	1.41999	0.448403	1.22506	0.429051	0.761555	0.429051	0.761555		abundance	146	146	lipids
tg_44:1	Recovery	Recovered	RecoveryRecovered	0.856751	0.448403	0.513085	0.429166	0.761555	0.429166	0.761555		abundance	146	146	lipids
lpe_16:0	Recovery	Recovered	RecoveryRecovered	1.52612	0.448403	1.36986	0.432387	0.761555	0.432387	0.761555		abundance	146	146	lipids
pe_p-36:5	Sex	Female	SexFemale	1.22923	0.573037	0.834268	0.433135	0.761555	0.433135	0.761555		abundance	146	146	lipids
sm_33:1;o2	Sex	Female	SexFemale	0.275598	0.573037	0.375112	0.433907	0.761555	0.433907	0.761555		abundance	146	146	lipids
tg_49:4	Sex	Female	SexFemale	0.877237	0.573037	0.3845	0.435414	0.761555	0.435414	0.761555		abundance	146	146	lipids
tg_54:7	Sex	Female	SexFemale	1.24604	0.573037	0.862148	0.436229	0.761555	0.436229	0.761555		abundance	146	146	lipids
dg_32:1	Recovery	Recovered	RecoveryRecovered	1.01281	0.448403	0.721404	0.436253	0.761555	0.436253	0.761555		abundance	146	146	lipids
sm_36:3;o2	Recovery	Recovered	RecoveryRecovered	-0.573119	0.448403	1.30932	0.436304	0.761555	0.436304	0.761555		abundance	146	146	lipids
tg_43:0	Recovery	Recovered	RecoveryRecovered	0.903499	0.448403	0.582546	0.437921	0.761555	0.437921	0.761555		abundance	146	146	lipids
car_18:2	Sex	Female	SexFemale	1.61347	0.573037	1.33983	0.43878	0.761555	0.43878	0.761555		abundance	146	146	lipids
fa_20:5	Sex	Female	SexFemale	0.364433	0.573037	0.261887	0.43897	0.761555	0.43897	0.761555		abundance	146	146	lipids
tg_47:3	Recovery	Recovered	RecoveryRecovered	1.00072	0.448403	0.710859	0.439013	0.761555	0.439013	0.761555		abundance	146	146	lipids
sm_41:2;o2	Recovery	Recovered	RecoveryRecovered	1.02284	0.448403	0.740696	0.439533	0.761555	0.439533	0.761555		abundance	146	146	lipids
sm_38:4;o2	Sex	Female	SexFemale	1.36694	0.573037	1.02507	0.439784	0.761555	0.439784	0.761555		abundance	146	146	lipids
tg_60:5	Recovery	Recovered	RecoveryRecovered	0.00465618	0.448403	0.570994	0.441111	0.762255	0.441111	0.762255		abundance	146	146	lipids
tg_50:4	Recovery	Recovered	RecoveryRecovered	1.21392	0.448403	0.996181	0.44395	0.764245	0.44395	0.764245		abundance	146	146	lipids
fa_24:2	Recovery	Recovered	RecoveryRecovered	-0.579015	0.448403	1.33903	0.444113	0.764245	0.444113	0.764245		abundance	146	146	lipids
tg_44:0	Sex	Female	SexFemale	0.965872	0.573037	0.510891	0.445261	0.764627	0.445261	0.764627		abundance	146	146	lipids
pc_o-34:5	Sex	Female	SexFemale	1.43534	0.573037	1.13661	0.449255	0.769885	0.449255	0.769885		abundance	146	146	lipids
tg_56:3	Recovery	Recovered	RecoveryRecovered	1.08629	0.448403	0.855518	0.457804	0.782911	0.457804	0.782911		abundance	146	146	lipids
pe_38:6	Sex	Female	SexFemale	1.31513	0.573037	1.00759	0.462274	0.786659	0.462274	0.786659		abundance	146	146	lipids
lpe_o-16:1	Recovery	Recovered	RecoveryRecovered	1.20266	0.448403	1.02686	0.463954	0.786659	0.463954	0.786659		abundance	146	146	lipids
dg_28:0	Sex	Female	SexFemale	0.886579	0.573037	0.423664	0.464008	0.786659	0.464008	0.786659		abundance	146	146	lipids
sm_44:5;o2	Sex	Female	SexFemale	1.27157	0.573037	0.95443	0.465374	0.786659	0.465374	0.786659		abundance	146	146	lipids
tg_52:2	Sex	Female	SexFemale	1.35217	0.573037	1.06623	0.466366	0.786659	0.466366	0.786659		abundance	146	146	lipids
pe_p-36:3	Sex	Female	SexFemale	-0.0138856	0.573037	0.802839	0.46708	0.786659	0.46708	0.786659		abundance	146	146	lipids
pc_34:3	Recovery	Recovered	RecoveryRecovered	1.16723	0.448403	0.987397	0.467448	0.786659	0.467448	0.786659		abundance	146	146	lipids
tg_54:6	Recovery	Recovered	RecoveryRecovered	1.09171	0.448403	0.882267	0.467747	0.786659	0.467747	0.786659		abundance	146	146	lipids
fa_22:5	Recovery	Recovered	RecoveryRecovered	-0.24367	0.448403	0.955023	0.469926	0.786659	0.469926	0.786659		abundance	146	146	lipids
fahfa_28:4;o	Sex	Female	SexFemale	-0.503467	0.573037	1.48807	0.470374	0.786659	0.470374	0.786659		abundance	146	146	lipids
tg_52:1	Sex	Female	SexFemale	1.28711	0.573037	0.987376	0.471089	0.786659	0.471089	0.786659		abundance	146	146	lipids
tg_54:7;o	Sex	Female	SexFemale	0.293719	0.573037	0.384089	0.471867	0.786659	0.471867	0.786659		abundance	146	146	lipids
lpi_18:1	Sex	Female	SexFemale	-0.0573889	0.573037	0.874375	0.472377	0.786659	0.472377	0.786659		abundance	146	146	lipids
tg_58:1	Sex	Female	SexFemale	1.0698	0.573037	0.691084	0.474312	0.788293	0.474312	0.788293		abundance	146	146	lipids
tg_58:7	Recovery	Recovered	RecoveryRecovered	1.26031	0.448403	1.14712	0.480051	0.796073	0.480051	0.796073		abundance	146	146	lipids
mg_18:1	Sex	Female	SexFemale	0.312695	0.573037	0.36671	0.483249	0.796073	0.483249	0.796073		abundance	146	146	lipids
lpe_20:4	Sex	Female	SexFemale	-0.490071	0.573037	1.51355	0.48339	0.796073	0.48339	0.796073		abundance	146	146	lipids
lpe_18:2	Sex	Female	SexFemale	-0.461223	0.573037	1.47886	0.485555	0.796073	0.485555	0.796073		abundance	146	146	lipids
dg_24:0	Sex	Female	SexFemale	0.787983	0.573037	0.303301	0.485571	0.796073	0.485571	0.796073		abundance	146	146	lipids
sm_28:1;o2	Sex	Female	SexFemale	0.0728252	0.573037	0.716553	0.486913	0.796073	0.486913	0.796073		abundance	146	146	lipids
tg_42:1	Sex	Female	SexFemale	0.87018	0.573037	0.424373	0.487635	0.796073	0.487635	0.796073		abundance	146	146	lipids
fa_22:3;o2	Sex	Female	SexFemale	1.85128	0.573037	1.83971	0.488131	0.796073	0.488131	0.796073		abundance	146	146	lipids
pe_p-36:5	Recovery	Recovered	RecoveryRecovered	1.02879	0.448403	0.837816	0.489928	0.796073	0.489928	0.796073		abundance	146	146	lipids
tg_40:1	Sex	Female	SexFemale	0.922762	0.573037	0.503644	0.490396	0.796073	0.490396	0.796073		abundance	146	146	lipids
tg_58:2	Recovery	Recovered	RecoveryRecovered	0.994426	0.448403	0.788983	0.490425	0.796073	0.490425	0.796073		abundance	146	146	lipids
fa_18:1	Recovery	Recovered	RecoveryRecovered	-0.358347	0.448403	1.16757	0.490732	0.796073	0.490732	0.796073		abundance	146	146	lipids
tg_38:0	Sex	Female	SexFemale	0.81302	0.573037	0.344807	0.49218	0.796073	0.49218	0.796073		abundance	146	146	lipids
fa_22:6	Recovery	Recovered	RecoveryRecovered	-0.27553	0.448403	1.05549	0.49387	0.796073	0.49387	0.796073		abundance	146	146	lipids
car_14:1	Recovery	Recovered	RecoveryRecovered	0.839418	0.448403	0.569778	0.494966	0.796073	0.494966	0.796073		abundance	146	146	lipids
tg_62:3	Sex	Female	SexFemale	1.00708	0.573037	0.633323	0.495273	0.796073	0.495273	0.796073		abundance	146	146	lipids
fa_18:2	Sex	Female	SexFemale	-0.262259	0.573037	1.22292	0.495377	0.796073	0.495377	0.796073		abundance	146	146	lipids
tg_47:1	Sex	Female	SexFemale	0.135607	0.573037	0.641581	0.496904	0.796977	0.496904	0.796977		abundance	146	146	lipids
pc_32:2	Recovery	Recovered	RecoveryRecovered	-0.393744	0.448403	1.24127	0.498363	0.797166	0.498363	0.797166		abundance	146	146	lipids
tg_56:2	Sex	Female	SexFemale	1.14698	0.573037	0.845506	0.498953	0.797166	0.498953	0.797166		abundance	146	146	lipids
tg_46:1	Sex	Female	SexFemale	0.917288	0.573037	0.510243	0.502823	0.801799	0.502823	0.801799		abundance	146	146	lipids
tg_38:2	Sex	Female	SexFemale	0.850381	0.573037	0.417405	0.510027	0.806682	0.510027	0.806682		abundance	146	146	lipids
cer_41:1;o2	Recovery	Recovered	RecoveryRecovered	1.02999	0.448403	0.880951	0.510187	0.806682	0.510187	0.806682		abundance	146	146	lipids
fa_20:3	Recovery	Recovered	RecoveryRecovered	-0.149117	0.448403	0.90446	0.510194	0.806682	0.510194	0.806682		abundance	146	146	lipids
ce_20:4	Sex	Female	SexFemale	-0.039831	0.573037	0.931392	0.512546	0.806682	0.512546	0.806682		abundance	146	146	lipids
tg_53:2	Sex	Female	SexFemale	-0.0202961	0.573037	0.902375	0.512722	0.806682	0.512722	0.806682		abundance	146	146	lipids
tg_42:1	Recovery	Recovered	RecoveryRecovered	0.729873	0.448403	0.426177	0.513312	0.806682	0.513312	0.806682		abundance	146	146	lipids
tg_44:3	Recovery	Recovered	RecoveryRecovered	0.825421	0.448403	0.574272	0.513453	0.806682	0.513453	0.806682		abundance	146	146	lipids
fa_16:1	Recovery	Recovered	RecoveryRecovered	-0.18961	0.448403	0.975395	0.513698	0.806682	0.513698	0.806682		abundance	146	146	lipids
tg_51:5	Sex	Female	SexFemale	0.851372	0.573037	0.426416	0.517737	0.809332	0.517737	0.809332		abundance	146	146	lipids
sm_42:2;o2	Sex	Female	SexFemale	0.880156	0.573037	0.472926	0.519333	0.809332	0.519333	0.809332		abundance	146	146	lipids
fa_18:0;o	Sex	Female	SexFemale	0.962697	0.573037	0.601169	0.519409	0.809332	0.519409	0.809332		abundance	146	146	lipids
tg_48:4	Recovery	Recovered	RecoveryRecovered	1.0117	0.448403	0.873551	0.520182	0.809332	0.520182	0.809332		abundance	146	146	lipids
pc_30:0	Recovery	Recovered	RecoveryRecovered	-0.431969	0.448403	1.37094	0.521584	0.809332	0.521584	0.809332		abundance	146	146	lipids
tg_56:5	Sex	Female	SexFemale	0.346542	0.573037	0.350224	0.523452	0.809332	0.523452	0.809332		abundance	146	146	lipids
tg_58:1	Recovery	Recovered	RecoveryRecovered	0.891958	0.448403	0.694023	0.523709	0.809332	0.523709	0.809332		abundance	146	146	lipids
fa_18:0;o	Recovery	Recovered	RecoveryRecovered	0.834108	0.448403	0.603726	0.524979	0.809332	0.524979	0.809332		abundance	146	146	lipids
tg_54:9	Sex	Female	SexFemale	0.937239	0.573037	0.571571	0.525605	0.809332	0.525605	0.809332		abundance	146	146	lipids
pe_36:3	Sex	Female	SexFemale	-0.0256862	0.573037	0.940469	0.526416	0.809332	0.526416	0.809332		abundance	146	146	lipids
tg_62:2	Sex	Female	SexFemale	0.918923	0.573037	0.544221	0.527537	0.809332	0.527537	0.809332		abundance	146	146	lipids
st_27:1;o	Sex	Female	SexFemale	1.44207	0.573037	1.37461	0.527971	0.809332	0.527971	0.809332		abundance	146	146	lipids
pc_35:2	Recovery	Recovered	RecoveryRecovered	0.927125	0.448403	0.755058	0.528351	0.809332	0.528351	0.809332		abundance	146	146	lipids
lpc_o-16:2	Sex	Female	SexFemale	0.0412806	0.573037	0.841251	0.529308	0.809332	0.529308	0.809332		abundance	146	146	lipids
sm_41:2;o2	Sex	Female	SexFemale	1.0367	0.573037	0.737559	0.530676	0.809332	0.530676	0.809332		abundance	146	146	lipids
tg_60:4	Recovery	Recovered	RecoveryRecovered	0.205774	0.448403	0.384192	0.531802	0.809332	0.531802	0.809332		abundance	146	146	lipids
pe_p-38:6	Recovery	Recovered	RecoveryRecovered	-0.34856	0.448403	1.2719	0.532043	0.809332	0.532043	0.809332		abundance	146	146	lipids
tg_52:6	Sex	Female	SexFemale	1.17744	0.573037	0.96859	0.533544	0.810124	0.533544	0.810124		abundance	146	146	lipids
lpc_20:1/0:0	Sex	Female	SexFemale	0.00526052	0.573037	0.910737	0.534591	0.810225	0.534591	0.810225		abundance	146	146	lipids
st_27:2;o	Recovery	Recovered	RecoveryRecovered	0.927558	0.448403	0.772034	0.53618	0.811144	0.53618	0.811144		abundance	146	146	lipids
pi_36:2	Sex	Female	SexFemale	-0.463197	0.573037	1.68202	0.538403	0.813018	0.538403	0.813018		abundance	146	146	lipids
tg_43:0	Sex	Female	SexFemale	0.218666	0.573037	0.580079	0.543431	0.819027	0.543431	0.819027		abundance	146	146	lipids
tg_53:1	Sex	Female	SexFemale	0.212628	0.573037	0.592498	0.544365	0.819027	0.544365	0.819027		abundance	146	146	lipids
lpc_17:0/0:0	Recovery	Recovered	RecoveryRecovered	0.786413	0.448403	0.558046	0.546914	0.821365	0.546914	0.821365		abundance	146	146	lipids
tg_58:4	Recovery	Recovered	RecoveryRecovered	0.912578	0.448403	0.771831	0.549169	0.822963	0.549169	0.822963		abundance	146	146	lipids
tg_54:1	Sex	Female	SexFemale	1.10642	0.573037	0.89105	0.549971	0.822963	0.549971	0.822963		abundance	146	146	lipids
pc_o-34:3	Recovery	Recovered	RecoveryRecovered	0.00568327	0.448403	0.743075	0.553575	0.826859	0.553575	0.826859		abundance	146	146	lipids
fa_18:0	Recovery	Recovered	RecoveryRecovered	0.146495	0.448403	0.509109	0.555072	0.827598	0.555072	0.827598		abundance	146	146	lipids
pc_o-38:7	Recovery	Recovered	RecoveryRecovered	-0.158948	0.448403	1.03378	0.557842	0.830229	0.557842	0.830229		abundance	146	146	lipids
cer_42:0;o2	Sex	Female	SexFemale	1.40584	0.573037	1.42431	0.559395	0.831044	0.559395	0.831044		abundance	146	146	lipids
pc_o-36:4	Sex	Female	SexFemale	-0.000209161	0.573037	0.981494	0.561155	0.832161	0.561155	0.832161		abundance	146	146	lipids
pe_36:4	Recovery	Recovered	RecoveryRecovered	-0.1614	0.448403	1.05466	0.563761	0.8337	0.563761	0.8337		abundance	146	146	lipids
tg_56:1	Recovery	Recovered	RecoveryRecovered	0.863239	0.448403	0.719042	0.564744	0.8337	0.564744	0.8337		abundance	146	146	lipids
tg_60:4	Sex	Female	SexFemale	0.79532	0.573037	0.382565	0.565221	0.8337	0.565221	0.8337		abundance	146	146	lipids
tg_34:0	Recovery	Recovered	RecoveryRecovered	0.625424	0.448403	0.305311	0.567997	0.834734	0.567997	0.834734		abundance	146	146	lipids
tg_56:9	Recovery	Recovered	RecoveryRecovered	-0.0361643	0.448403	0.847218	0.569203	0.834734	0.569203	0.834734		abundance	146	146	lipids
tg_53:4	Recovery	Recovered	RecoveryRecovered	0.627922	0.448403	0.311377	0.570584	0.834734	0.570584	0.834734		abundance	146	146	lipids
sm_44:5;o2	Recovery	Recovered	RecoveryRecovered	-0.0945005	0.448403	0.958488	0.571349	0.834734	0.571349	0.834734		abundance	146	146	lipids
tg_55:2	Sex	Female	SexFemale	0.807922	0.573037	0.411692	0.571753	0.834734	0.571753	0.834734		abundance	146	146	lipids
fa_18:0	Sex	Female	SexFemale	0.285023	0.573037	0.506954	0.571985	0.834734	0.571985	0.834734		abundance	146	146	lipids
lpc_16:0/0:0	Sex	Female	SexFemale	1.32342	0.573037	1.3327	0.573975	0.836161	0.573975	0.836161		abundance	146	146	lipids
ba_24:1;o3;t	Sex	Female	SexFemale	0.97005	0.573037	0.713069	0.579095	0.841989	0.579095	0.841989		abundance	146	146	lipids
fa_26:0;o	Recovery	Recovered	RecoveryRecovered	-0.0399635	0.448403	0.87889	0.580014	0.841989	0.580014	0.841989		abundance	146	146	lipids
tg_38:2	Recovery	Recovered	RecoveryRecovered	0.678869	0.448403	0.41918	0.586695	0.849117	0.586695	0.849117		abundance	146	146	lipids
pi_36:3	Sex	Female	SexFemale	-0.0435358	0.573037	1.13227	0.587578	0.849117	0.587578	0.849117		abundance	146	146	lipids
tg_56:7	Recovery	Recovered	RecoveryRecovered	1.00586	0.448403	1.03188	0.589701	0.849117	0.589701	0.849117		abundance	146	146	lipids
fa_25:0;o	Recovery	Recovered	RecoveryRecovered	0.0901012	0.448403	0.662635	0.589791	0.849117	0.589791	0.849117		abundance	146	146	lipids
tg_50:5	Recovery	Recovered	RecoveryRecovered	0.995183	0.448403	1.01285	0.590064	0.849117	0.590064	0.849117		abundance	146	146	lipids
tg_62:3	Recovery	Recovered	RecoveryRecovered	0.105878	0.448403	0.636016	0.591264	0.849363	0.591264	0.849363		abundance	146	146	lipids
ce_22:4	Recovery	Recovered	RecoveryRecovered	0.127031	0.448403	0.60133	0.594393	0.851102	0.594393	0.851102		abundance	146	146	lipids
tg_46:0	Sex	Female	SexFemale	0.980777	0.573037	0.765562	0.595225	0.851102	0.595225	0.851102		abundance	146	146	lipids
tg_42:3	Sex	Female	SexFemale	0.827016	0.573037	0.476592	0.59655	0.851102	0.59655	0.851102		abundance	146	146	lipids
tg_58:11	Sex	Female	SexFemale	0.850601	0.573037	0.523478	0.597482	0.851102	0.597482	0.851102		abundance	146	146	lipids
tg_36:1	Sex	Female	SexFemale	0.780635	0.573037	0.389434	0.597736	0.851102	0.597736	0.851102		abundance	146	146	lipids
tg_58:4	Sex	Female	SexFemale	0.979072	0.573037	0.768562	0.598656	0.851102	0.598656	0.851102		abundance	146	146	lipids
lpc_14:0/0:0	Recovery	Recovered	RecoveryRecovered	-0.287726	0.448403	1.4022	0.600339	0.851775	0.600339	0.851775		abundance	146	146	lipids
pc_37:3	Recovery	Recovered	RecoveryRecovered	0.162061	0.448403	0.544542	0.601192	0.851775	0.601192	0.851775		abundance	146	146	lipids
fahfa_28:2;2o	Sex	Female	SexFemale	0.181596	0.573037	0.75214	0.603418	0.853465	0.603418	0.853465		abundance	146	146	lipids
tg_42:0	Recovery	Recovered	RecoveryRecovered	0.706842	0.448403	0.498641	0.606929	0.856963	0.606929	0.856963		abundance	146	146	lipids
dg_36:4	Recovery	Recovered	RecoveryRecovered	0.969117	0.448403	1.02437	0.612	0.862649	0.612	0.862649		abundance	146	146	lipids
dg_32:4	Recovery	Recovered	RecoveryRecovered	0.281924	0.448403	0.327834	0.616125	0.86644	0.616125	0.86644		abundance	146	146	lipids
pc_36:2	Sex	Female	SexFemale	1.30368	0.573037	1.46124	0.617728	0.86644	0.617728	0.86644		abundance	146	146	lipids
car_18:2	Recovery	Recovered	RecoveryRecovered	-0.223279	0.448403	1.34553	0.618267	0.86644	0.618267	0.86644		abundance	146	146	lipids
pe_p-40:6	Sex	Female	SexFemale	0.464747	0.573037	0.209746	0.618885	0.86644	0.618885	0.86644		abundance	146	146	lipids
pc_o-34:2	Recovery	Recovered	RecoveryRecovered	0.222284	0.448403	0.45575	0.621376	0.868455	0.621376	0.868455		abundance	146	146	lipids
dg_32:2	Recovery	Recovered	RecoveryRecovered	0.221161	0.448403	0.465041	0.627897	0.875461	0.627897	0.875461		abundance	146	146	lipids
tg_36:0	Sex	Female	SexFemale	0.740851	0.573037	0.342803	0.628817	0.875461	0.628817	0.875461		abundance	146	146	lipids
tg_43:1	Recovery	Recovered	RecoveryRecovered	0.66638	0.448403	0.449493	0.629841	0.875461	0.629841	0.875461		abundance	146	146	lipids
dg_32:4	Sex	Female	SexFemale	0.732622	0.573037	0.326446	0.630629	0.875461	0.630629	0.875461		abundance	146	146	lipids
pc_36:1	Sex	Female	SexFemale	0.00106885	0.573037	1.19573	0.633698	0.878247	0.633698	0.878247		abundance	146	146	lipids
ba_24:1;o4;g;s	Recovery	Recovered	RecoveryRecovered	0.874043	0.448403	0.895672	0.635195	0.878846	0.635195	0.878846		abundance	146	146	lipids
pi_38:5	Sex	Female	SexFemale	0.0977478	0.573037	1.0032	0.636294	0.878894	0.636294	0.878894		abundance	146	146	lipids
pe_p-36:2	Sex	Female	SexFemale	0.124159	0.573037	0.958237	0.639886	0.882381	0.639886	0.882381		abundance	146	146	lipids
pc_o-34:1	Recovery	Recovered	RecoveryRecovered	1.05477	0.448403	1.29976	0.641171	0.882679	0.641171	0.882679		abundance	146	146	lipids
tg_52:0	Sex	Female	SexFemale	0.25024	0.573037	0.697077	0.644073	0.885031	0.644073	0.885031		abundance	146	146	lipids
tg_42:3	Recovery	Recovered	RecoveryRecovered	0.670267	0.448403	0.478618	0.645023	0.885031	0.645023	0.885031		abundance	146	146	lipids
lpe_o-18:1	Recovery	Recovered	RecoveryRecovered	0.683526	0.448403	0.51411	0.649608	0.887952	0.649608	0.887952		abundance	146	146	lipids
fa_18:2	Recovery	Recovered	RecoveryRecovered	-0.109629	0.448403	1.22812	0.649876	0.887952	0.649876	0.887952		abundance	146	146	lipids
tg_36:1	Recovery	Recovered	RecoveryRecovered	0.62679	0.448403	0.39109	0.65085	0.887952	0.65085	0.887952		abundance	146	146	lipids
fa_16:0	Sex	Female	SexFemale	0.0440239	0.573037	1.16741	0.651451	0.887952	0.651451	0.887952		abundance	146	146	lipids
tg_51:2	Sex	Female	SexFemale	0.169164	0.573037	0.899915	0.654316	0.889557	0.654316	0.889557		abundance	146	146	lipids
fa_24:4	Sex	Female	SexFemale	-0.137312	0.573037	1.58755	0.654787	0.889557	0.654787	0.889557		abundance	146	146	lipids
cer_42:2;o2	Recovery	Recovered	RecoveryRecovered	0.872029	0.448403	0.953569	0.657572	0.889557	0.657572	0.889557		abundance	146	146	lipids
ce_18:3	Recovery	Recovered	RecoveryRecovered	0.761464	0.448403	0.705256	0.657903	0.889557	0.657903	0.889557		abundance	146	146	lipids
dg_30:1	Recovery	Recovered	RecoveryRecovered	0.650052	0.448403	0.452596	0.658335	0.889557	0.658335	0.889557		abundance	146	146	lipids
tg_50:1;o	Recovery	Recovered	RecoveryRecovered	0.295678	0.448403	0.342064	0.659091	0.889557	0.659091	0.889557		abundance	146	146	lipids
pc_35:2	Sex	Female	SexFemale	0.245547	0.573037	0.751861	0.664171	0.894181	0.664171	0.894181		abundance	146	146	lipids
tg_50:6	Recovery	Recovered	RecoveryRecovered	0.851655	0.448403	0.929876	0.665221	0.894181	0.665221	0.894181		abundance	146	146	lipids
lpc_15:0/0:0	Recovery	Recovered	RecoveryRecovered	0.648038	0.448403	0.4588	0.665764	0.894181	0.665764	0.894181		abundance	146	146	lipids
fa_20:2	Sex	Female	SexFemale	0.0483133	0.573037	1.21451	0.666898	0.89425	0.666898	0.89425		abundance	146	146	lipids
tg_58:3	Recovery	Recovered	RecoveryRecovered	0.766376	0.448403	0.740541	0.668556	0.894982	0.668556	0.894982		abundance	146	146	lipids
dg_30:2	Recovery	Recovered	RecoveryRecovered	0.718161	0.448403	0.630481	0.66984	0.894982	0.66984	0.894982		abundance	146	146	lipids
lpc_20:4/0:0	Sex	Female	SexFemale	1.19119	0.573037	1.45132	0.670695	0.894982	0.670695	0.894982		abundance	146	146	lipids
fa_16:0	Recovery	Recovered	RecoveryRecovered	-0.0480505	0.448403	1.17238	0.672967	0.895192	0.672967	0.895192		abundance	146	146	lipids
sm_36:1;o2	Recovery	Recovered	RecoveryRecovered	1.16985	0.448403	1.70716	0.67302	0.895192	0.67302	0.895192		abundance	146	146	lipids
pc_o-38:5	Recovery	Recovered	RecoveryRecovered	-0.0288342	0.448403	1.13199	0.674259	0.895399	0.674259	0.895399		abundance	146	146	lipids
lpe_o-18:1	Sex	Female	SexFemale	0.35885	0.573037	0.511933	0.677276	0.897727	0.677276	0.897727		abundance	146	146	lipids
tg_52:2;o	Recovery	Recovered	RecoveryRecovered	0.630575	0.448403	0.438104	0.679548	0.897727	0.679548	0.897727		abundance	146	146	lipids
dg_30:1	Sex	Female	SexFemale	0.759188	0.573037	0.450679	0.681586	0.897727	0.681586	0.897727		abundance	146	146	lipids
st_27:2;o	Sex	Female	SexFemale	0.887535	0.573037	0.768765	0.683463	0.897727	0.683463	0.897727		abundance	146	146	lipids
pe_p-36:4	Recovery	Recovered	RecoveryRecovered	-0.107148	0.448403	1.36803	0.684931	0.897727	0.684931	0.897727		abundance	146	146	lipids
pc_o-38:4	Recovery	Recovered	RecoveryRecovered	0.0224891	0.448403	1.04782	0.685235	0.897727	0.685235	0.897727		abundance	146	146	lipids
tg_48:0	Sex	Female	SexFemale	0.957989	0.573037	0.948675	0.685793	0.897727	0.685793	0.897727		abundance	146	146	lipids
tg_54:0	Recovery	Recovered	RecoveryRecovered	0.6221	0.448403	0.426444	0.685941	0.897727	0.685941	0.897727		abundance	146	146	lipids
pc_o-40:6	Recovery	Recovered	RecoveryRecovered	1.00259	0.448403	1.37867	0.688091	0.897727	0.688091	0.897727		abundance	146	146	lipids
pc_o-40:6	Sex	Female	SexFemale	1.1217	0.573037	1.37283	0.689778	0.897727	0.689778	0.897727		abundance	146	146	lipids
hex2cer_34:1;o2	Recovery	Recovered	RecoveryRecovered	0.818058	0.448403	0.933865	0.692793	0.897727	0.692793	0.897727		abundance	146	146	lipids
tg_50:1;o	Sex	Female	SexFemale	0.437124	0.573037	0.340616	0.693181	0.897727	0.693181	0.897727		abundance	146	146	lipids
sm_45:5;o2	Recovery	Recovered	RecoveryRecovered	0.349771	0.448403	0.246347	0.695453	0.897727	0.695453	0.897727		abundance	146	146	lipids
tg_52:8	Recovery	Recovered	RecoveryRecovered	0.157836	0.448403	0.746622	0.697783	0.897727	0.697783	0.897727		abundance	146	146	lipids
tg_45:0	Recovery	Recovered	RecoveryRecovered	0.643072	0.448403	0.499864	0.698743	0.897727	0.698743	0.897727		abundance	146	146	lipids
tg_48:5	Recovery	Recovered	RecoveryRecovered	0.822555	0.448403	0.967193	0.699209	0.897727	0.699209	0.897727		abundance	146	146	lipids
tg_52:5	Sex	Female	SexFemale	0.945518	0.573037	0.963096	0.699249	0.897727	0.699249	0.897727		abundance	146	146	lipids
tg_48:1	Sex	Female	SexFemale	0.93733	0.573037	0.949447	0.701729	0.897727	0.701729	0.897727		abundance	146	146	lipids
lpi_20:4	Recovery	Recovered	RecoveryRecovered	1.14764	0.448403	1.83787	0.703973	0.897727	0.703973	0.897727		abundance	146	146	lipids
ce_18:2	Sex	Female	SexFemale	1.05379	0.573037	1.26577	0.704382	0.897727	0.704382	0.897727		abundance	146	146	lipids
tg_52:2;o	Sex	Female	SexFemale	0.406905	0.573037	0.436249	0.704889	0.897727	0.704889	0.897727		abundance	146	146	lipids
tg_40:3	Sex	Female	SexFemale	0.755614	0.573037	0.479938	0.705472	0.897727	0.705472	0.897727		abundance	146	146	lipids
tg_52:6	Recovery	Recovered	RecoveryRecovered	0.816699	0.448403	0.972709	0.705615	0.897727	0.705615	0.897727		abundance	146	146	lipids
ce_22:5	Recovery	Recovered	RecoveryRecovered	0.675305	0.448403	0.599109	0.706201	0.897727	0.706201	0.897727		abundance	146	146	lipids
nae_26:5	Recovery	Recovered	RecoveryRecovered	0.968549	0.448403	1.38156	0.706843	0.897727	0.706843	0.897727		abundance	146	146	lipids
pe_p-40:7	Sex	Female	SexFemale	0.286307	0.573037	0.760809	0.707127	0.897727	0.707127	0.897727		abundance	146	146	lipids
tg_56:2	Recovery	Recovered	RecoveryRecovered	0.76777	0.448403	0.849102	0.707296	0.897727	0.707296	0.897727		abundance	146	146	lipids
pc_28:0	Sex	Female	SexFemale	0.264656	0.573037	0.820075	0.707496	0.897727	0.707496	0.897727		abundance	146	146	lipids
tg_43:2	Sex	Female	SexFemale	0.398675	0.573037	0.462183	0.707531	0.897727	0.707531	0.897727		abundance	146	146	lipids
tg_50:7	Recovery	Recovered	RecoveryRecovered	0.184397	0.448403	0.706508	0.709468	0.898804	0.709468	0.898804		abundance	146	146	lipids
fa_22:6	Sex	Female	SexFemale	0.959444	0.573037	1.05102	0.713567	0.900725	0.713567	0.900725		abundance	146	146	lipids
fa_14:1	Recovery	Recovered	RecoveryRecovered	0.186697	0.448403	0.711748	0.713681	0.900725	0.713681	0.900725		abundance	146	146	lipids
pc_o-34:1	Sex	Female	SexFemale	0.101588	0.573037	1.29425	0.716033	0.900725	0.716033	0.900725		abundance	146	146	lipids
pc_38:4	Recovery	Recovered	RecoveryRecovered	0.900236	0.448403	1.24691	0.717583	0.900725	0.717583	0.900725		abundance	146	146	lipids
tg_36:0	Recovery	Recovered	RecoveryRecovered	0.32289	0.448403	0.34426	0.719152	0.900725	0.719152	0.900725		abundance	146	146	lipids
fa_20:0	Sex	Female	SexFemale	0.447274	0.573037	0.34824	0.721226	0.900725	0.721226	0.900725		abundance	146	146	lipids
tg_52:3;o	Sex	Female	SexFemale	0.450386	0.573037	0.340275	0.722133	0.900725	0.722133	0.900725		abundance	146	146	lipids
pc_o-41:11	Sex	Female	SexFemale	0.953357	0.573037	1.07029	0.722914	0.900725	0.722914	0.900725		abundance	146	146	lipids
pe_36:3	Recovery	Recovered	RecoveryRecovered	0.782158	0.448403	0.944468	0.724194	0.900725	0.724194	0.900725		abundance	146	146	lipids
lpc_o-16:2	Recovery	Recovered	RecoveryRecovered	0.746329	0.448403	0.844828	0.724826	0.900725	0.724826	0.900725		abundance	146	146	lipids
nagly_24:6	Sex	Female	SexFemale	0.397025	0.573037	0.500674	0.726401	0.900725	0.726401	0.900725		abundance	146	146	lipids
pi_32:0	Sex	Female	SexFemale	0.144419	0.573037	1.22403	0.726639	0.900725	0.726639	0.900725		abundance	146	146	lipids
tg_54:7	Recovery	Recovered	RecoveryRecovered	0.751168	0.448403	0.865814	0.727065	0.900725	0.727065	0.900725		abundance	146	146	lipids
pc_32:0	Recovery	Recovered	RecoveryRecovered	0.906074	0.448403	1.33344	0.731666	0.900725	0.731666	0.900725		abundance	146	146	lipids
tg_40:3	Recovery	Recovered	RecoveryRecovered	0.614414	0.448403	0.481979	0.731861	0.900725	0.731861	0.900725		abundance	146	146	lipids
ce_22:5	Sex	Female	SexFemale	0.777132	0.573037	0.596572	0.733508	0.900725	0.733508	0.900725		abundance	146	146	lipids
pc_36:3	Sex	Female	SexFemale	1.00375	0.573037	1.26951	0.734593	0.900725	0.734593	0.900725		abundance	146	146	lipids
nagly_24:3;o	Recovery	Recovered	RecoveryRecovered	0.19522	0.448403	0.746446	0.734982	0.900725	0.734982	0.900725		abundance	146	146	lipids
sm_42:1;o2	Sex	Female	SexFemale	1.00503	0.573037	1.28097	0.736354	0.900725	0.736354	0.900725		abundance	146	146	lipids
mg_18:2	Recovery	Recovered	RecoveryRecovered	0.392919	0.448403	0.153552	0.736968	0.900725	0.736968	0.900725		abundance	146	146	lipids
pc_o-38:7	Sex	Female	SexFemale	0.918973	0.573037	1.02941	0.737104	0.900725	0.737104	0.900725		abundance	146	146	lipids
pc_o-37:8	Recovery	Recovered	RecoveryRecovered	0.812388	0.448403	1.08926	0.738806	0.900725	0.738806	0.900725		abundance	146	146	lipids
ce_22:4	Sex	Female	SexFemale	0.772936	0.573037	0.598784	0.739553	0.900725	0.739553	0.900725		abundance	146	146	lipids
sm_41:1;o2	Sex	Female	SexFemale	0.319579	0.573037	0.762014	0.739989	0.900725	0.739989	0.900725		abundance	146	146	lipids
car_18:1	Recovery	Recovered	RecoveryRecovered	0.0178289	0.448403	1.30087	0.741441	0.900725	0.741441	0.900725		abundance	146	146	lipids
cer_42:2;o2	Sex	Female	SexFemale	0.886194	0.573037	0.949531	0.741828	0.900725	0.741828	0.900725		abundance	146	146	lipids
pc_o-32:0	Recovery	Recovered	RecoveryRecovered	0.942145	0.448403	1.50034	0.742416	0.900725	0.742416	0.900725		abundance	146	146	lipids
pc_o-34:5	Recovery	Recovered	RecoveryRecovered	0.0731767	0.448403	1.14144	0.742525	0.900725	0.742525	0.900725		abundance	146	146	lipids
tg_60:2	Recovery	Recovered	RecoveryRecovered	0.697072	0.448403	0.754724	0.742607	0.900725	0.742607	0.900725		abundance	146	146	lipids
ce_16:0	Recovery	Recovered	RecoveryRecovered	0.961617	0.448403	1.59344	0.747612	0.905466	0.747612	0.905466		abundance	146	146	lipids
tg_34:0	Sex	Female	SexFemale	0.671259	0.573037	0.304018	0.75111	0.908271	0.75111	0.908271		abundance	146	146	lipids
pc_40:5	Sex	Female	SexFemale	0.199946	0.573037	1.18494	0.753066	0.908271	0.753066	0.908271		abundance	146	146	lipids
st_29:1;o	Recovery	Recovered	RecoveryRecovered	0.303645	0.448403	0.457808	0.753227	0.908271	0.753227	0.908271		abundance	146	146	lipids
ba_24:1;o4;t	Sex	Female	SexFemale	0.698677	0.573037	0.4023	0.756988	0.909106	0.756988	0.909106		abundance	146	146	lipids
lpc_20:2/0:0	Sex	Female	SexFemale	0.249831	0.573037	1.04546	0.757462	0.909106	0.757462	0.909106		abundance	146	146	lipids
pi_38:4	Recovery	Recovered	RecoveryRecovered	0.82253	0.448403	1.2107	0.757753	0.909106	0.757753	0.909106		abundance	146	146	lipids
tg_58:9	Recovery	Recovered	RecoveryRecovered	0.167973	0.448403	0.912992	0.759001	0.909106	0.759001	0.909106		abundance	146	146	lipids
pc_o-40:7	Sex	Female	SexFemale	0.948337	0.573037	1.22494	0.759654	0.909106	0.759654	0.909106		abundance	146	146	lipids
hexcer_36:3;o3	Sex	Female	SexFemale	0.156158	0.573037	1.3732	0.76147	0.909106	0.76147	0.909106		abundance	146	146	lipids
tg_45:1	Recovery	Recovered	RecoveryRecovered	0.587551	0.448403	0.456405	0.761624	0.909106	0.761624	0.909106		abundance	146	146	lipids
pe_p-34:1	Sex	Female	SexFemale	0.398559	0.573037	0.576307	0.762802	0.909198	0.762802	0.909198		abundance	146	146	lipids
lpc_14:0/0:0	Sex	Female	SexFemale	0.161182	0.573037	1.39627	0.768263	0.914218	0.768263	0.914218		abundance	146	146	lipids
tg_59:2	Sex	Female	SexFemale	0.441824	0.573037	0.445502	0.77013	0.914218	0.77013	0.914218		abundance	146	146	lipids
tg_49:3	Sex	Female	SexFemale	0.343295	0.573037	0.785623	0.770333	0.914218	0.770333	0.914218		abundance	146	146	lipids
tg_58:8	Recovery	Recovered	RecoveryRecovered	0.739851	0.448403	1.00585	0.772369	0.915318	0.772369	0.915318		abundance	146	146	lipids
st_27:1;o	Recovery	Recovered	RecoveryRecovered	0.844533	0.448403	1.38046	0.77451	0.915354	0.77451	0.915354		abundance	146	146	lipids
tg_46:4	Recovery	Recovered	RecoveryRecovered	0.597224	0.448403	0.517357	0.774615	0.915354	0.774615	0.915354		abundance	146	146	lipids
tg_38:0	Recovery	Recovered	RecoveryRecovered	0.35023	0.448403	0.346273	0.779214	0.919472	0.779214	0.919472		abundance	146	146	lipids
pe_36:4	Sex	Female	SexFemale	0.285354	0.573037	1.0502	0.784506	0.922107	0.784506	0.922107		abundance	146	146	lipids
pc_34:3	Sex	Female	SexFemale	0.841485	0.573037	0.983216	0.785295	0.922107	0.785295	0.922107		abundance	146	146	lipids
pi_40:5	Sex	Female	SexFemale	0.741863	0.573037	0.618484	0.785493	0.922107	0.785493	0.922107		abundance	146	146	lipids
pc_34:1	Sex	Female	SexFemale	0.193623	0.573037	1.41322	0.788553	0.922107	0.788553	0.922107		abundance	146	146	lipids
tg_55:4	Recovery	Recovered	RecoveryRecovered	0.353495	0.448403	0.34977	0.788972	0.922107	0.788972	0.922107		abundance	146	146	lipids
dg_38:5	Recovery	Recovered	RecoveryRecovered	0.795535	0.448403	1.29659	0.789116	0.922107	0.789116	0.922107		abundance	146	146	lipids
pi_36:1	Recovery	Recovered	RecoveryRecovered	0.734134	0.448403	1.06685	0.789261	0.922107	0.789261	0.922107		abundance	146	146	lipids
tg_40:0	Recovery	Recovered	RecoveryRecovered	0.346952	0.448403	0.38001	0.791459	0.923369	0.791459	0.923369		abundance	146	146	lipids
pc_40:7	Recovery	Recovered	RecoveryRecovered	0.670091	0.448403	0.849955	0.794547	0.924497	0.794547	0.924497		abundance	146	146	lipids
pi_38:6	Sex	Female	SexFemale	1.03898	0.573037	1.79483	0.795375	0.924497	0.795375	0.924497		abundance	146	146	lipids
pc_38:6	Recovery	Recovered	RecoveryRecovered	0.0984635	0.448403	1.35129	0.795784	0.924497	0.795784	0.924497		abundance	146	146	lipids
fahfa_28:4;o	Recovery	Recovered	RecoveryRecovered	0.0633426	0.448403	1.4944	0.797407	0.924936	0.797407	0.924936		abundance	146	146	lipids
pc_30:0	Sex	Female	SexFemale	0.921988	0.573037	1.36514	0.798401	0.924936	0.798401	0.924936		abundance	146	146	lipids
sm_32:1;o2	Sex	Female	SexFemale	0.31528	0.573037	1.02609	0.801858	0.92764	0.801858	0.92764		abundance	146	146	lipids
tg_49:1	Recovery	Recovered	RecoveryRecovered	0.559702	0.448403	0.4457	0.803971	0.928783	0.803971	0.928783		abundance	146	146	lipids
tg_53:4	Sex	Female	SexFemale	0.49558	0.573037	0.310058	0.805404	0.929139	0.805404	0.929139		abundance	146	146	lipids
tg_51:4	Sex	Female	SexFemale	0.350597	0.573037	0.910405	0.80727	0.929265	0.80727	0.929265		abundance	146	146	lipids
fa_20:3	Sex	Female	SexFemale	0.354277	0.573037	0.90063	0.808375	0.929265	0.808375	0.929265		abundance	146	146	lipids
pc_o-32:0	Sex	Female	SexFemale	0.211188	0.573037	1.49399	0.808888	0.929265	0.808888	0.929265		abundance	146	146	lipids
tg_45:2	Sex	Female	SexFemale	0.714437	0.573037	0.588447	0.810499	0.929822	0.810499	0.929822		abundance	146	146	lipids
tg_62:2	Recovery	Recovered	RecoveryRecovered	0.318489	0.448403	0.546535	0.812955	0.931346	0.812955	0.931346		abundance	146	146	lipids
sm_36:1;o2	Sex	Female	SexFemale	0.184194	0.573037	1.69993	0.819223	0.937227	0.819223	0.937227		abundance	146	146	lipids
pc_o-36:4	Recovery	Recovered	RecoveryRecovered	0.227323	0.448403	0.985667	0.822865	0.938228	0.822865	0.938228		abundance	146	146	lipids
car_14:0	Recovery	Recovered	RecoveryRecovered	0.724208	0.448403	1.24415	0.824779	0.938228	0.824779	0.938228		abundance	146	146	lipids
tg_62:12	Sex	Female	SexFemale	0.636636	0.573037	0.284605	0.825885	0.938228	0.825885	0.938228		abundance	146	146	lipids
dg_38:7	Sex	Female	SexFemale	0.651056	0.573037	0.352552	0.82633	0.938228	0.82633	0.938228		abundance	146	146	lipids
pi_37:4	Recovery	Recovered	RecoveryRecovered	0.583057	0.448403	0.616555	0.82754	0.938228	0.82754	0.938228		abundance	146	146	lipids
fa_14:0	Sex	Female	SexFemale	0.365874	0.573037	0.952454	0.827867	0.938228	0.827867	0.938228		abundance	146	146	lipids
fa_10:0	Sex	Female	SexFemale	0.508503	0.573037	0.293457	0.828748	0.938228	0.828748	0.938228		abundance	146	146	lipids
pe_38:4	Recovery	Recovered	RecoveryRecovered	0.597791	0.448403	0.694044	0.829798	0.938228	0.829798	0.938228		abundance	146	146	lipids
tg_43:1	Sex	Female	SexFemale	0.476953	0.573037	0.447589	0.830979	0.938228	0.830979	0.938228		abundance	146	146	lipids
pi_36:4	Sex	Female	SexFemale	0.146381	0.573037	2.00316	0.831456	0.938228	0.831456	0.938228		abundance	146	146	lipids
fa_24:5	Recovery	Recovered	RecoveryRecovered	0.182985	0.448403	1.26167	0.833477	0.939226	0.833477	0.939226		abundance	146	146	lipids
fa_22:3	Sex	Female	SexFemale	0.35381	0.573037	1.05111	0.835087	0.939758	0.835087	0.939758		abundance	146	146	lipids
fa_24:5	Sex	Female	SexFemale	0.830175	0.573037	1.25633	0.83794	0.941685	0.83794	0.941685		abundance	146	146	lipids
lpc_18:0/0:0	Sex	Female	SexFemale	0.375108	0.573037	0.977512	0.839653	0.942329	0.839653	0.942329		abundance	146	146	lipids
pc_o-40:5	Recovery	Recovered	RecoveryRecovered	0.243835	0.448403	1.02525	0.842029	0.943713	0.842029	0.943713		abundance	146	146	lipids
lpe_22:6	Recovery	Recovered	RecoveryRecovered	0.72003	0.448403	1.38104	0.844173	0.944833	0.844173	0.944833		abundance	146	146	lipids
fa_22:3	Recovery	Recovered	RecoveryRecovered	0.253514	0.448403	1.05558	0.853808	0.953287	0.853808	0.953287		abundance	146	146	lipids
pc_o-32:1	Recovery	Recovered	RecoveryRecovered	0.197376	0.448403	1.36218	0.854035	0.953287	0.854035	0.953287		abundance	146	146	lipids
tg_41:1	Sex	Female	SexFemale	0.473392	0.573037	0.551624	0.857177	0.955504	0.857177	0.955504		abundance	146	146	lipids
pc_o-41:5	Recovery	Recovered	RecoveryRecovered	0.355289	0.448403	0.520113	0.858554	0.955603	0.858554	0.955603		abundance	146	146	lipids
car_16:0	Recovery	Recovered	RecoveryRecovered	0.194135	0.448403	1.4461	0.860567	0.955603	0.860567	0.955603		abundance	146	146	lipids
pc_o-42:6	Sex	Female	SexFemale	0.398035	0.573037	0.995761	0.860737	0.955603	0.860737	0.955603		abundance	146	146	lipids
pc_34:4	Recovery	Recovered	RecoveryRecovered	0.58607	0.448403	0.795974	0.863091	0.95693	0.863091	0.95693		abundance	146	146	lipids
dg_40:8	Recovery	Recovered	RecoveryRecovered	0.388857	0.448403	0.35851	0.86927	0.960172	0.86927	0.960172		abundance	146	146	lipids
pc_28:0	Recovery	Recovered	RecoveryRecovered	0.313164	0.448403	0.823562	0.869739	0.960172	0.869739	0.960172		abundance	146	146	lipids
pc_37:2	Recovery	Recovered	RecoveryRecovered	0.295646	0.448403	0.941257	0.871223	0.960172	0.871223	0.960172		abundance	146	146	lipids
fahfa_28:3;2o	Recovery	Recovered	RecoveryRecovered	0.155436	0.448403	1.84544	0.873986	0.960172	0.873986	0.960172		abundance	146	146	lipids
tg_62:14	Sex	Female	SexFemale	0.524201	0.573037	0.305097	0.87475	0.960172	0.87475	0.960172		abundance	146	146	lipids
sm_34:2;o2	Sex	Female	SexFemale	0.448888	0.573037	0.787184	0.874762	0.960172	0.874762	0.960172		abundance	146	146	lipids
pi_38:4	Sex	Female	SexFemale	0.760435	0.573037	1.20558	0.876461	0.960172	0.876461	0.960172		abundance	146	146	lipids
tg_54:0	Sex	Female	SexFemale	0.638718	0.573037	0.424639	0.878187	0.960172	0.878187	0.960172		abundance	146	146	lipids
pc_34:2	Sex	Female	SexFemale	0.800862	0.573037	1.49343	0.878878	0.960172	0.878878	0.960172		abundance	146	146	lipids
pc_o-37:8	Sex	Female	SexFemale	0.408322	0.573037	1.08465	0.879417	0.960172	0.879417	0.960172		abundance	146	146	lipids
pi_36:1	Sex	Female	SexFemale	0.733079	0.573037	1.06234	0.880472	0.960172	0.880472	0.960172		abundance	146	146	lipids
dg_32:2	Sex	Female	SexFemale	0.642872	0.573037	0.463072	0.880891	0.960172	0.880891	0.960172		abundance	146	146	lipids
lpc_18:2/0:0	Sex	Female	SexFemale	0.812989	0.573037	1.60308	0.881126	0.960172	0.881126	0.960172		abundance	146	146	lipids
tg_47:0	Recovery	Recovered	RecoveryRecovered	0.480596	0.448403	0.215922	0.885182	0.961824	0.885182	0.961824		abundance	146	146	lipids
pc_40:4	Sex	Female	SexFemale	0.383713	0.573037	1.33264	0.887093	0.961824	0.887093	0.961824		abundance	146	146	lipids
hex2cer_34:1;o2	Sex	Female	SexFemale	0.443134	0.573037	0.929911	0.889003	0.961824	0.889003	0.961824		abundance	146	146	lipids
pi_38:3	Sex	Female	SexFemale	0.745058	0.573037	1.24127	0.889884	0.961824	0.889884	0.961824		abundance	146	146	lipids
pe_40:6	Recovery	Recovered	RecoveryRecovered	0.349413	0.448403	0.718891	0.890685	0.961824	0.890685	0.961824		abundance	146	146	lipids
fahfa_28:3;o	Sex	Female	SexFemale	0.766069	0.573037	1.41079	0.891308	0.961824	0.891308	0.961824		abundance	146	146	lipids
dg_32:1	Sex	Female	SexFemale	0.670818	0.573037	0.71835	0.891923	0.961824	0.891923	0.961824		abundance	146	146	lipids
lpc_20:2/0:0	Recovery	Recovered	RecoveryRecovered	0.305832	0.448403	1.0499	0.891958	0.961824	0.891958	0.961824		abundance	146	146	lipids
tg_53:3	Sex	Female	SexFemale	0.445906	0.573037	1.00792	0.899674	0.96888	0.899674	0.96888		abundance	146	146	lipids
tg_41:0	Recovery	Recovered	RecoveryRecovered	0.417993	0.448403	0.24171	0.902156	0.969137	0.902156	0.969137		abundance	146	146	lipids
pc_36:6	Recovery	Recovered	RecoveryRecovered	0.549751	0.448403	0.827799	0.902728	0.969137	0.902728	0.969137		abundance	146	146	lipids
lpc_16:1/0:0	Recovery	Recovered	RecoveryRecovered	0.549488	0.448403	0.841075	0.904504	0.969137	0.904504	0.969137		abundance	146	146	lipids
pc_o-40:5	Sex	Female	SexFemale	0.693284	0.573037	1.02091	0.906327	0.969137	0.906327	0.969137		abundance	146	146	lipids
lpi_18:2	Sex	Female	SexFemale	0.732435	0.573037	1.38163	0.90822	0.969137	0.90822	0.969137		abundance	146	146	lipids
tg_45:1	Sex	Female	SexFemale	0.520865	0.573037	0.454473	0.909156	0.969137	0.909156	0.969137		abundance	146	146	lipids
cer_42:1;o2	Recovery	Recovered	RecoveryRecovered	0.345855	0.448403	0.90501	0.909815	0.969137	0.909815	0.969137		abundance	146	146	lipids
pe_34:2	Sex	Female	SexFemale	0.430585	0.573037	1.26426	0.910361	0.969137	0.910361	0.969137		abundance	146	146	lipids
cer_42:0;o2	Recovery	Recovered	RecoveryRecovered	0.608117	0.448403	1.43036	0.911199	0.969137	0.911199	0.969137		abundance	146	146	lipids
tg_32:0	Sex	Female	SexFemale	0.541226	0.573037	0.290517	0.914349	0.969137	0.914349	0.969137		abundance	146	146	lipids
pe_p-34:2	Sex	Female	SexFemale	0.427497	0.573037	1.36012	0.914828	0.969137	0.914828	0.969137		abundance	146	146	lipids
pc_o-40:7	Recovery	Recovered	RecoveryRecovered	0.317177	0.448403	1.23015	0.915084	0.969137	0.915084	0.969137		abundance	146	146	lipids
tg_52:5;o	Recovery	Recovered	RecoveryRecovered	0.352048	0.448403	0.903221	0.915166	0.969137	0.915166	0.969137		abundance	146	146	lipids
fa_22:4	Sex	Female	SexFemale	0.452783	0.573037	1.15377	0.917073	0.969914	0.917073	0.969914		abundance	146	146	lipids
fa_20:4	Sex	Female	SexFemale	0.508853	0.573037	0.633397	0.919471	0.970691	0.919471	0.970691		abundance	146	146	lipids
pe_34:2	Recovery	Recovered	RecoveryRecovered	0.572762	0.448403	1.26964	0.922037	0.970691	0.922037	0.970691		abundance	146	146	lipids
fa_25:0;o	Sex	Female	SexFemale	0.509088	0.573037	0.65983	0.923036	0.970691	0.923036	0.970691		abundance	146	146	lipids
pc_40:6	Recovery	Recovered	RecoveryRecovered	0.574718	0.448403	1.32771	0.924283	0.970691	0.924283	0.970691		abundance	146	146	lipids
tg_60:13	Sex	Female	SexFemale	0.547161	0.573037	0.266522	0.924378	0.970691	0.924378	0.970691		abundance	146	146	lipids
pc_38:3	Sex	Female	SexFemale	0.705513	0.573037	1.40294	0.924859	0.970691	0.924859	0.970691		abundance	146	146	lipids
tg_56:8	Recovery	Recovered	RecoveryRecovered	0.369299	0.448403	0.898446	0.929886	0.973462	0.929886	0.973462		abundance	146	146	lipids
tg_51:3	Sex	Female	SexFemale	0.490923	0.573037	0.938478	0.930306	0.973462	0.930306	0.973462		abundance	146	146	lipids
fa_24:2	Sex	Female	SexFemale	0.458787	0.573037	1.33336	0.931761	0.973462	0.931761	0.973462		abundance	146	146	lipids
sm_34:2;o2	Recovery	Recovered	RecoveryRecovered	0.381073	0.448403	0.790531	0.932214	0.973462	0.932214	0.973462		abundance	146	146	lipids
tg_52:1;o	Recovery	Recovered	RecoveryRecovered	0.423049	0.448403	0.320923	0.937779	0.977308	0.937779	0.977308		abundance	146	146	lipids
tg_47:2	Sex	Female	SexFemale	0.630928	0.573037	0.746395	0.938263	0.977308	0.938263	0.977308		abundance	146	146	lipids
mg_18:1	Recovery	Recovered	RecoveryRecovered	0.475817	0.448403	0.368269	0.941273	0.979209	0.941273	0.979209		abundance	146	146	lipids
tg_52:7	Recovery	Recovered	RecoveryRecovered	0.513765	0.448403	0.935443	0.944352	0.981176	0.944352	0.981176		abundance	146	146	lipids
car_14:1	Sex	Female	SexFemale	0.610863	0.573037	0.567365	0.947066	0.982759	0.947066	0.982759		abundance	146	146	lipids
sm_36:2;o2	Recovery	Recovered	RecoveryRecovered	0.524226	0.448403	1.19249	0.949363	0.983907	0.949363	0.983907		abundance	146	146	lipids
car_18:1	Sex	Female	SexFemale	0.507698	0.573037	1.29536	0.959807	0.990009	0.959807	0.990009		abundance	146	146	lipids
pc_36:4	Recovery	Recovered	RecoveryRecovered	0.390793	0.448403	1.16007	0.960445	0.990009	0.960445	0.990009		abundance	146	146	lipids
lpe_22:6	Sex	Female	SexFemale	0.640874	0.573037	1.37519	0.960671	0.990009	0.960671	0.990009		abundance	146	146	lipids
sm_38:4;o2	Recovery	Recovered	RecoveryRecovered	0.49918	0.448403	1.02943	0.960686	0.990009	0.960686	0.990009		abundance	146	146	lipids
tg_56:10	Sex	Female	SexFemale	0.589032	0.573037	0.324599	0.961244	0.990009	0.961244	0.990009		abundance	146	146	lipids
nae_22:4	Sex	Female	SexFemale	0.593382	0.573037	0.441361	0.963362	0.990809	0.963362	0.990809		abundance	146	146	lipids
tg_58:12	Sex	Female	SexFemale	0.560235	0.573037	0.290034	0.965364	0.990809	0.965364	0.990809		abundance	146	146	lipids
ce_16:1	Recovery	Recovered	RecoveryRecovered	0.434454	0.448403	0.325676	0.966345	0.990809	0.966345	0.990809		abundance	146	146	lipids
tg_58:5	Recovery	Recovered	RecoveryRecovered	0.411875	0.448403	0.909665	0.968011	0.990809	0.968011	0.990809		abundance	146	146	lipids
pe_34:1	Sex	Female	SexFemale	0.593036	0.573037	0.496236	0.968018	0.990809	0.968018	0.990809		abundance	146	146	lipids
tg_50:0	Sex	Female	SexFemale	0.598554	0.573037	0.660848	0.969288	0.990882	0.969288	0.990882		abundance	146	146	lipids
sm_34:1;o2	Recovery	Recovered	RecoveryRecovered	0.508606	0.448403	1.64351	0.970802	0.990955	0.970802	0.990955		abundance	146	146	lipids
fahfa_28:3;2o	Sex	Female	SexFemale	0.637386	0.573037	1.83762	0.972093	0.990955	0.972093	0.990955		abundance	146	146	lipids
tg_51:1	Sex	Female	SexFemale	0.544723	0.573037	0.847433	0.973396	0.990955	0.973396	0.990955		abundance	146	146	lipids
ce_20:3	Recovery	Recovered	RecoveryRecovered	0.427043	0.448403	0.657409	0.974159	0.990955	0.974159	0.990955		abundance	146	146	lipids
pc_35:1	Recovery	Recovered	RecoveryRecovered	0.433726	0.448403	0.500706	0.976708	0.992326	0.976708	0.992326		abundance	146	146	lipids
tg_39:0	Recovery	Recovered	RecoveryRecovered	0.454733	0.448403	0.236087	0.979178	0.993295	0.979178	0.993295		abundance	146	146	lipids
lpe_16:0	Sex	Female	SexFemale	0.607125	0.573037	1.36406	0.980068	0.993295	0.980068	0.993295		abundance	146	146	lipids
fa_22:2	Sex	Female	SexFemale	0.597186	0.573037	1.10326	0.982568	0.99461	0.982568	0.99461		abundance	146	146	lipids
fa_22:5	Sex	Female	SexFemale	0.590773	0.573037	0.950979	0.985147	0.995114	0.985147	0.995114		abundance	146	146	lipids
nagly_24:6	Recovery	Recovered	RecoveryRecovered	0.457596	0.448403	0.502803	0.985476	0.995114	0.985476	0.995114		abundance	146	146	lipids
dg_38:6	Recovery	Recovered	RecoveryRecovered	0.432961	0.448403	1.07006	0.988503	0.996952	0.988503	0.996952		abundance	146	146	lipids
tg_54:3;o	Recovery	Recovered	RecoveryRecovered	0.445345	0.448403	0.29967	0.99197	0.999228	0.99197	0.999228		abundance	146	146	lipids
pc_o-35:6	Sex	Female	SexFemale	0.577818	0.573037	0.715475	0.994676	0.999739	0.994676	0.999739		abundance	146	146	lipids
pe_p-36:1	Recovery	Recovered	RecoveryRecovered	0.44261	0.448403	1.14639	0.995974	0.999739	0.995974	0.999739		abundance	146	146	lipids
dg_28:0	Recovery	Recovered	RecoveryRecovered	0.449417	0.448403	0.425466	0.998111	0.999739	0.998111	0.999739		abundance	146	146	lipids
lpc_20:4/0:0	Recovery	Recovered	RecoveryRecovered	0.447388	0.448403	1.45749	0.999446	0.999739	0.999446	0.999739		abundance	146	146	lipids
pe_38:4	Sex	Female	SexFemale	0.572805	0.573037	0.691105	0.999733	0.999739	0.999733	0.999739		abundance	146	146	lipids
tg_47:3	Sex	Female	SexFemale	0.573269	0.573037	0.707849	0.999739	0.999739	0.999739	0.999739		abundance	146	146	lipids
PWY-2941	Recovery	Recovered	RecoveryRecovered	3.3566e-05	7.6291e-07	1.64573e-05	0.0761309	0.999827	0.0761309	0.999827		abundance	150	150	pathways
PWY-6897	Recovery	Recovered	RecoveryRecovered	-1.70514e-05	7.6291e-07	8.97284e-06	0.143787	0.999827	0.143787	0.999827		abundance	150	150	pathways
LACTOSECAT-PWY	Recovery	Recovered	RecoveryRecovered	2.23044e-05	7.6291e-07	1.26953e-05	0.155417	0.999827	0.155417	0.999827		abundance	150	150	pathways
PWY-241	Recovery	Recovered	RecoveryRecovered	-1.73043e-05	7.6291e-07	1.01469e-05	0.167128	0.999827	0.167128	0.999827		abundance	150	150	pathways
PANTO-PWY	Recovery	Recovered	RecoveryRecovered	-1.65889e-05	7.6291e-07	1.02056e-05	0.186003	0.999827	0.186003	0.999827		abundance	150	150	pathways
PWY-6936	Recovery	Recovered	RecoveryRecovered	1.99902e-05	7.6291e-07	1.34434e-05	0.223244	0.999827	0.223244	0.999827		abundance	150	150	pathways
NONMEVIPP-PWY	Recovery	Recovered	RecoveryRecovered	-2.23438e-05	7.6291e-07	1.70712e-05	0.223829	0.999827	0.223829	0.999827		abundance	150	150	pathways
FOLSYN-PWY	Recovery	Recovered	RecoveryRecovered	1.85748e-05	7.6291e-07	1.24663e-05	0.233539	0.999827	0.233539	0.999827		abundance	150	150	pathways
UNMAPPED	Sex	Female	SexFemale	0.00982364	-5.59283e-07	0.00835919	0.241795	0.999827	0.241795	0.999827		abundance	150	150	pathways
PWY-6612	Recovery	Recovered	RecoveryRecovered	1.69371e-05	7.6291e-07	1.18363e-05	0.262156	0.999827	0.262156	0.999827		abundance	150	150	pathways
PWY-1042	Recovery	Recovered	RecoveryRecovered	-2.83296e-05	7.6291e-07	2.45912e-05	0.263216	0.999827	0.263216	0.999827		abundance	150	150	pathways
ILEUSYN-PWY	Recovery	Recovered	RecoveryRecovered	-2.09108e-05	7.6291e-07	1.75216e-05	0.26379	0.999827	0.26379	0.999827		abundance	150	150	pathways
PWY-5103	Recovery	Recovered	RecoveryRecovered	-2.04645e-05	7.6291e-07	1.71803e-05	0.266057	0.999827	0.266057	0.999827		abundance	150	150	pathways
BRANCHED-CHAIN-AA-SYN-PWY	Recovery	Recovered	RecoveryRecovered	-1.99386e-05	7.6291e-07	1.67315e-05	0.267751	0.999827	0.267751	0.999827		abundance	150	150	pathways
UNINTEGRATED	Sex	Female	SexFemale	-0.00869371	-5.59283e-07	0.00785988	0.270531	0.999827	0.270531	0.999827		abundance	150	150	pathways
PWY-6902	Recovery	Recovered	RecoveryRecovered	1.42442e-05	7.6291e-07	1.04128e-05	0.309515	0.999827	0.309515	0.999827		abundance	150	150	pathways
PWY-8187	Recovery	Recovered	RecoveryRecovered	1.31694e-05	7.6291e-07	9.15813e-06	0.313146	0.999827	0.313146	0.999827		abundance	150	150	pathways
PWY0-1586	Recovery	Recovered	RecoveryRecovered	3.26055e-05	7.6291e-07	3.05974e-05	0.316195	0.999827	0.316195	0.999827		abundance	150	150	pathways
PWY-622	Recovery	Recovered	RecoveryRecovered	-1.53398e-05	7.6291e-07	1.39156e-05	0.319625	0.999827	0.319625	0.999827		abundance	150	150	pathways
VALSYN-PWY	Recovery	Recovered	RecoveryRecovered	-1.96771e-05	7.6291e-07	1.88923e-05	0.32204	0.999827	0.32204	0.999827		abundance	150	150	pathways
FERMENTATION-PWY	Recovery	Recovered	RecoveryRecovered	1.50852e-05	7.6291e-07	1.1921e-05	0.322857	0.999827	0.322857	0.999827		abundance	150	150	pathways
PWY-7560	Recovery	Recovered	RecoveryRecovered	-1.22724e-05	7.6291e-07	1.08402e-05	0.338049	0.999827	0.338049	0.999827		abundance	150	150	pathways
PWY-8178	Recovery	Recovered	RecoveryRecovered	1.70224e-05	7.6291e-07	1.53169e-05	0.35013	0.999827	0.35013	0.999827		abundance	150	150	pathways
PWY-7234	Recovery	Recovered	RecoveryRecovered	1.70757e-05	7.6291e-07	1.56306e-05	0.356215	0.999827	0.356215	0.999827		abundance	150	150	pathways
RHAMCAT-PWY	Recovery	Recovered	RecoveryRecovered	-1.16887e-05	7.6291e-07	1.14918e-05	0.378159	0.999827	0.378159	0.999827		abundance	150	150	pathways
PWY-5265	Recovery	Recovered	RecoveryRecovered	1.58209e-05	7.6291e-07	1.49806e-05	0.378629	0.999827	0.378629	0.999827		abundance	150	150	pathways
PWY-7977	Recovery	Recovered	RecoveryRecovered	-1.36372e-05	7.6291e-07	1.41323e-05	0.378784	0.999827	0.378784	0.999827		abundance	150	150	pathways
GLUCONEO-PWY	Recovery	Recovered	RecoveryRecovered	-9.03401e-06	7.6291e-07	7.81711e-06	0.386961	0.999827	0.386961	0.999827		abundance	150	150	pathways
PWY-5188	Recovery	Recovered	RecoveryRecovered	-9.82281e-06	7.6291e-07	9.20533e-06	0.390538	0.999827	0.390538	0.999827		abundance	150	150	pathways
PWY-5989	Recovery	Recovered	RecoveryRecovered	1.23351e-05	7.6291e-07	1.07614e-05	0.39265	0.999827	0.39265	0.999827		abundance	150	150	pathways
PWY-7663	Recovery	Recovered	RecoveryRecovered	1.39642e-05	7.6291e-07	1.32029e-05	0.396162	0.999827	0.396162	0.999827		abundance	150	150	pathways
PWY0-1061	Recovery	Recovered	RecoveryRecovered	-1.3108e-05	7.6291e-07	1.42188e-05	0.398679	0.999827	0.398679	0.999827		abundance	150	150	pathways
PANTOSYN-PWY	Recovery	Recovered	RecoveryRecovered	-1.06985e-05	7.6291e-07	1.08737e-05	0.400267	0.999827	0.400267	0.999827		abundance	150	150	pathways
PWY-6895	Recovery	Recovered	RecoveryRecovered	-1.02111e-05	7.6291e-07	1.0251e-05	0.403344	0.999827	0.403344	0.999827		abundance	150	150	pathways
PWY-6549	Recovery	Recovered	RecoveryRecovered	-9.01664e-06	7.6291e-07	8.37713e-06	0.404005	0.999827	0.404005	0.999827		abundance	150	150	pathways
PWY-5484	Recovery	Recovered	RecoveryRecovered	-9.66653e-06	7.6291e-07	9.46626e-06	0.404985	0.999827	0.404985	0.999827		abundance	150	150	pathways
PWY0-1586	Sex	Female	SexFemale	-3.7894e-05	-5.59283e-07	3.04662e-05	0.405512	0.999827	0.405512	0.999827		abundance	150	150	pathways
P108-PWY	Recovery	Recovered	RecoveryRecovered	7.9076e-06	7.6291e-07	2.77169e-06	0.407913	0.999827	0.407913	0.999827		abundance	150	150	pathways
PWY0-1297	Recovery	Recovered	RecoveryRecovered	1.42712e-05	7.6291e-07	1.4245e-05	0.411767	0.999827	0.411767	0.999827		abundance	150	150	pathways
PWY-6606	Recovery	Recovered	RecoveryRecovered	1.17506e-05	7.6291e-07	1.08345e-05	0.418905	0.999827	0.418905	0.999827		abundance	150	150	pathways
HSERMETANA-PWY	Recovery	Recovered	RecoveryRecovered	1.30831e-05	7.6291e-07	1.28711e-05	0.419931	0.999827	0.419931	0.999827		abundance	150	150	pathways
P161-PWY	Recovery	Recovered	RecoveryRecovered	1.44838e-05	7.6291e-07	1.55346e-05	0.435279	0.999827	0.435279	0.999827		abundance	150	150	pathways
PWY66-409	Recovery	Recovered	RecoveryRecovered	1.23179e-05	7.6291e-07	1.23298e-05	0.435431	0.999827	0.435431	0.999827		abundance	150	150	pathways
PWY-6545	Recovery	Recovered	RecoveryRecovered	-7.6839e-06	7.6291e-07	7.15645e-06	0.437198	0.999827	0.437198	0.999827		abundance	150	150	pathways
PWY0-1241	Recovery	Recovered	RecoveryRecovered	-7.00944e-06	7.6291e-07	5.91153e-06	0.441262	0.999827	0.441262	0.999827		abundance	150	150	pathways
NONOXIPENT-PWY	Recovery	Recovered	RecoveryRecovered	1.57314e-05	7.6291e-07	1.76217e-05	0.441856	0.999827	0.441856	0.999827		abundance	150	150	pathways
GLUCOSE1PMETAB-PWY	Recovery	Recovered	RecoveryRecovered	-1.48281e-05	7.6291e-07	1.85425e-05	0.442585	0.999827	0.442585	0.999827		abundance	150	150	pathways
RIBOSYN2-PWY	Recovery	Recovered	RecoveryRecovered	1.00762e-05	7.6291e-07	9.1293e-06	0.447739	0.999827	0.447739	0.999827		abundance	150	150	pathways
PWY-7221	Recovery	Recovered	RecoveryRecovered	-1.57348e-05	7.6291e-07	2.0232e-05	0.450567	0.999827	0.450567	0.999827		abundance	150	150	pathways
PWY0-1477	Recovery	Recovered	RecoveryRecovered	1.75623e-05	7.6291e-07	2.10842e-05	0.458428	0.999827	0.458428	0.999827		abundance	150	150	pathways
PWY66-429	Sex	Female	SexFemale	2.51739e-05	-5.59283e-07	1.19922e-05	0.46224	0.999827	0.46224	0.999827		abundance	150	150	pathways
FAO-PWY	Recovery	Recovered	RecoveryRecovered	1.09487e-05	7.6291e-07	1.16007e-05	0.473508	0.999827	0.473508	0.999827		abundance	150	150	pathways
PWY-5994	Recovery	Recovered	RecoveryRecovered	-7.33855e-06	7.6291e-07	7.87423e-06	0.475692	0.999827	0.475692	0.999827		abundance	150	150	pathways
PWY-2941	Sex	Female	SexFemale	2.56023e-05	-5.59283e-07	1.63867e-05	0.476493	0.999827	0.476493	0.999827		abundance	150	150	pathways
PWY0-1298	Recovery	Recovered	RecoveryRecovered	1.02934e-05	7.6291e-07	1.07219e-05	0.480194	0.999827	0.480194	0.999827		abundance	150	150	pathways
PWY-5913	Sex	Female	SexFemale	-2.54869e-05	-5.59283e-07	1.42637e-05	0.486795	0.999827	0.486795	0.999827		abundance	150	150	pathways
PWY-5690	Recovery	Recovered	RecoveryRecovered	-5.67985e-06	7.6291e-07	4.49338e-06	0.489813	0.999827	0.489813	0.999827		abundance	150	150	pathways
PWY0-301	Recovery	Recovered	RecoveryRecovered	1.01839e-05	7.6291e-07	1.11733e-05	0.496745	0.999827	0.496745	0.999827		abundance	150	150	pathways
PWY0-1477	Sex	Female	SexFemale	-2.6783e-05	-5.59283e-07	2.09938e-05	0.501621	0.999827	0.501621	0.999827		abundance	150	150	pathways
PWY-7111	Sex	Female	SexFemale	-2.92141e-05	-5.59283e-07	2.71421e-05	0.501836	0.999827	0.501836	0.999827		abundance	150	150	pathways
THREOCAT-PWY	Recovery	Recovered	RecoveryRecovered	6.64528e-06	7.6291e-07	3.41225e-06	0.506604	0.999827	0.506604	0.999827		abundance	150	150	pathways
PWY-5981	Recovery	Recovered	RecoveryRecovered	8.30811e-06	7.6291e-07	7.96337e-06	0.508842	0.999827	0.508842	0.999827		abundance	150	150	pathways
ANAEROFRUCAT-PWY	Recovery	Recovered	RecoveryRecovered	-7.78796e-06	7.6291e-07	1.00832e-05	0.510426	0.999827	0.510426	0.999827		abundance	150	150	pathways
PYRIDNUCSYN-PWY	Recovery	Recovered	RecoveryRecovered	-9.35182e-06	7.6291e-07	1.32213e-05	0.515832	0.999827	0.515832	0.999827		abundance	150	150	pathways
PWY-5130	Recovery	Recovered	RecoveryRecovered	6.73015e-06	7.6291e-07	4.46446e-06	0.521739	0.999827	0.521739	0.999827		abundance	150	150	pathways
PWY-7357	Recovery	Recovered	RecoveryRecovered	-7.91151e-06	7.6291e-07	1.08666e-05	0.523989	0.999827	0.523989	0.999827		abundance	150	150	pathways
PWY1ZNC-1	Recovery	Recovered	RecoveryRecovered	-6.04331e-06	7.6291e-07	7.04781e-06	0.528409	0.999827	0.528409	0.999827		abundance	150	150	pathways
PWY0-1337	Recovery	Recovered	RecoveryRecovered	6.33933e-06	7.6291e-07	3.64026e-06	0.533088	0.999827	0.533088	0.999827		abundance	150	150	pathways
PWY-7115	Recovery	Recovered	RecoveryRecovered	-5.89942e-06	7.6291e-07	6.91245e-06	0.533917	0.999827	0.533917	0.999827		abundance	150	150	pathways
FASYN-INITIAL-PWY	Recovery	Recovered	RecoveryRecovered	-5.18887e-06	7.6291e-07	4.9785e-06	0.534062	0.999827	0.534062	0.999827		abundance	150	150	pathways
PYRIDOXSYN-PWY	Recovery	Recovered	RecoveryRecovered	8.3007e-06	7.6291e-07	8.96675e-06	0.534774	0.999827	0.534774	0.999827		abundance	150	150	pathways
PWY-5723	Sex	Female	SexFemale	-2.25747e-05	-5.59283e-07	1.44199e-05	0.539731	0.999827	0.539731	0.999827		abundance	150	150	pathways
PWY-7220	Recovery	Recovered	RecoveryRecovered	9.85163e-06	7.6291e-07	1.23982e-05	0.541018	0.999827	0.541018	0.999827		abundance	150	150	pathways
PWY-7222	Recovery	Recovered	RecoveryRecovered	9.85163e-06	7.6291e-07	1.23982e-05	0.541031	0.999827	0.541031	0.999827		abundance	150	150	pathways
PWY-7184	Recovery	Recovered	RecoveryRecovered	8.35066e-06	7.6291e-07	9.36194e-06	0.541894	0.999827	0.541894	0.999827		abundance	150	150	pathways
P4-PWY	Sex	Female	SexFemale	-2.20179e-05	-5.59283e-07	1.28473e-05	0.543214	0.999827	0.543214	0.999827		abundance	150	150	pathways
PWY-5973	Sex	Female	SexFemale	2.03553e-05	-5.59283e-07	1.07214e-05	0.545247	0.999827	0.545247	0.999827		abundance	150	150	pathways
NAD-BIOSYNTHESIS-II	Recovery	Recovered	RecoveryRecovered	6.58759e-06	7.6291e-07	5.13226e-06	0.546169	0.999827	0.546169	0.999827		abundance	150	150	pathways
PWY-7238	Sex	Female	SexFemale	-2.75716e-05	-5.59283e-07	3.05336e-05	0.547466	0.999827	0.547466	0.999827		abundance	150	150	pathways
PWY-6803	Sex	Female	SexFemale	-2.15283e-05	-5.59283e-07	1.23135e-05	0.550285	0.999827	0.550285	0.999827		abundance	150	150	pathways
PWY-6902	Sex	Female	SexFemale	-2.10106e-05	-5.59283e-07	1.03682e-05	0.552929	0.999827	0.552929	0.999827		abundance	150	150	pathways
PWY0-1261	Recovery	Recovered	RecoveryRecovered	8.30221e-06	7.6291e-07	9.77823e-06	0.554517	0.999827	0.554517	0.999827		abundance	150	150	pathways
PWY-5675	Sex	Female	SexFemale	-2.14217e-05	-5.59283e-07	1.29995e-05	0.555086	0.999827	0.555086	0.999827		abundance	150	150	pathways
PWY66-429	Recovery	Recovered	RecoveryRecovered	9.34667e-06	7.6291e-07	1.20439e-05	0.555837	0.999827	0.555837	0.999827		abundance	150	150	pathways
PWY-6590	Recovery	Recovered	RecoveryRecovered	-4.44848e-06	7.6291e-07	3.55371e-06	0.558662	0.999827	0.558662	0.999827		abundance	150	150	pathways
PWY-1861	Recovery	Recovered	RecoveryRecovered	6.47127e-06	7.6291e-07	5.36584e-06	0.559375	0.999827	0.559375	0.999827		abundance	150	150	pathways
PWY-7345	Recovery	Recovered	RecoveryRecovered	-6.9245e-06	7.6291e-07	1.03241e-05	0.559698	0.999827	0.559698	0.999827		abundance	150	150	pathways
PWY0-781	Sex	Female	SexFemale	-2.09232e-05	-5.59283e-07	1.22479e-05	0.561574	0.999827	0.561574	0.999827		abundance	150	150	pathways
PWY-5941	Sex	Female	SexFemale	-2.4794e-05	-5.59283e-07	2.62843e-05	0.564992	0.999827	0.564992	0.999827		abundance	150	150	pathways
PWY-5659	Recovery	Recovered	RecoveryRecovered	7.76475e-06	7.6291e-07	9.08403e-06	0.56686	0.999827	0.56686	0.999827		abundance	150	150	pathways
GALACTARDEG-PWY	Sex	Female	SexFemale	-2.11581e-05	-5.59283e-07	1.46477e-05	0.567086	0.999827	0.567086	0.999827		abundance	150	150	pathways
GLUCARGALACTSUPER-PWY	Sex	Female	SexFemale	-2.11581e-05	-5.59283e-07	1.46477e-05	0.567092	0.999827	0.567092	0.999827		abundance	150	150	pathways
PWY-6823	Recovery	Recovered	RecoveryRecovered	-5.84789e-06	7.6291e-07	8.21266e-06	0.568529	0.999827	0.568529	0.999827		abundance	150	150	pathways
PWY-621	Recovery	Recovered	RecoveryRecovered	-9.46103e-06	7.6291e-07	1.59662e-05	0.56923	0.999827	0.56923	0.999827		abundance	150	150	pathways
PWY-6527	Recovery	Recovered	RecoveryRecovered	9.70541e-06	7.6291e-07	1.34657e-05	0.570726	0.999827	0.570726	0.999827		abundance	150	150	pathways
PWY0-166	Recovery	Recovered	RecoveryRecovered	7.74586e-06	7.6291e-07	9.26098e-06	0.572146	0.999827	0.572146	0.999827		abundance	150	150	pathways
TCA	Recovery	Recovered	RecoveryRecovered	7.98904e-06	7.6291e-07	9.89536e-06	0.573725	0.999827	0.573725	0.999827		abundance	150	150	pathways
PWY-7118	Recovery	Recovered	RecoveryRecovered	8.0881e-06	7.6291e-07	1.01267e-05	0.573821	0.999827	0.573821	0.999827		abundance	150	150	pathways
PWY-7094	Recovery	Recovered	RecoveryRecovered	5.74688e-06	7.6291e-07	3.51602e-06	0.57529	0.999827	0.57529	0.999827		abundance	150	150	pathways
METSYN-PWY	Sex	Female	SexFemale	-2.0719e-05	-5.59283e-07	1.48174e-05	0.576106	0.999827	0.576106	0.999827		abundance	150	150	pathways
PWY-5138	Recovery	Recovered	RecoveryRecovered	6.09495e-06	7.6291e-07	4.98304e-06	0.577547	0.999827	0.577547	0.999827		abundance	150	150	pathways
PWY-5347	Sex	Female	SexFemale	-2.06707e-05	-5.59283e-07	1.49839e-05	0.577755	0.999827	0.577755	0.999827		abundance	150	150	pathways
P461-PWY	Recovery	Recovered	RecoveryRecovered	1.02472e-05	7.6291e-07	1.49699e-05	0.578683	0.999827	0.578683	0.999827		abundance	150	150	pathways
PWY-7013	Recovery	Recovered	RecoveryRecovered	7.09468e-06	7.6291e-07	7.94374e-06	0.578751	0.999827	0.578751	0.999827		abundance	150	150	pathways
PWY-8004	Recovery	Recovered	RecoveryRecovered	7.40807e-06	7.6291e-07	9.03893e-06	0.585801	0.999827	0.585801	0.999827		abundance	150	150	pathways
PWY-1269	Recovery	Recovered	RecoveryRecovered	-6.78005e-06	7.6291e-07	1.12313e-05	0.587492	0.999827	0.587492	0.999827		abundance	150	150	pathways
PENTOSE-P-PWY	Sex	Female	SexFemale	-1.9876e-05	-5.59283e-07	1.42376e-05	0.589734	0.999827	0.589734	0.999827		abundance	150	150	pathways
LIPASYN-PWY	Recovery	Recovered	RecoveryRecovered	8.54781e-06	7.6291e-07	1.1895e-05	0.589985	0.999827	0.589985	0.999827		abundance	150	150	pathways
PWY-7198	Recovery	Recovered	RecoveryRecovered	-6.86135e-06	7.6291e-07	1.15681e-05	0.590768	0.999827	0.590768	0.999827		abundance	150	150	pathways
DTDPRHAMSYN-PWY	Recovery	Recovered	RecoveryRecovered	-1.98633e-05	7.6291e-07	3.7689e-05	0.593483	0.999827	0.593483	0.999827		abundance	150	150	pathways
MET-SAM-PWY	Sex	Female	SexFemale	-1.9572e-05	-5.59283e-07	1.4524e-05	0.596776	0.999827	0.596776	0.999827		abundance	150	150	pathways
PEPTIDOGLYCANSYN-PWY	Recovery	Recovered	RecoveryRecovered	-1.00104e-05	7.6291e-07	1.87657e-05	0.599164	0.999827	0.599164	0.999827		abundance	150	150	pathways
GLYCOLYSIS	Recovery	Recovered	RecoveryRecovered	-5.74587e-06	7.6291e-07	9.3331e-06	0.600034	0.999827	0.600034	0.999827		abundance	150	150	pathways
PWY-6749	Recovery	Recovered	RecoveryRecovered	5.42327e-06	7.6291e-07	3.54213e-06	0.600716	0.999827	0.600716	0.999827		abundance	150	150	pathways
PWY-6901	Recovery	Recovered	RecoveryRecovered	7.70217e-06	7.6291e-07	1.04512e-05	0.6013	0.999827	0.6013	0.999827		abundance	150	150	pathways
PWY-8131	Recovery	Recovered	RecoveryRecovered	5.34918e-06	7.6291e-07	3.22594e-06	0.601554	0.999827	0.601554	0.999827		abundance	150	150	pathways
PWY-6168	Recovery	Recovered	RecoveryRecovered	7.31421e-06	7.6291e-07	9.71033e-06	0.605967	0.999827	0.605967	0.999827		abundance	150	150	pathways
PWY-6471	Recovery	Recovered	RecoveryRecovered	5.94323e-06	7.6291e-07	5.83686e-06	0.606014	0.999827	0.606014	0.999827		abundance	150	150	pathways
PWY-841	Recovery	Recovered	RecoveryRecovered	8.22286e-06	7.6291e-07	1.19346e-05	0.606408	0.999827	0.606408	0.999827		abundance	150	150	pathways
TCA-GLYOX-BYPASS	Recovery	Recovered	RecoveryRecovered	7.387e-06	7.6291e-07	9.99207e-06	0.608103	0.999827	0.608103	0.999827		abundance	150	150	pathways
PWY-6609	Recovery	Recovered	RecoveryRecovered	1.12819e-05	7.6291e-07	1.88806e-05	0.609704	0.999827	0.609704	0.999827		abundance	150	150	pathways
PWY-561	Recovery	Recovered	RecoveryRecovered	7.52478e-06	7.6291e-07	1.04252e-05	0.610028	0.999827	0.610028	0.999827		abundance	150	150	pathways
PWY-6386	Recovery	Recovered	RecoveryRecovered	-9.73632e-06	7.6291e-07	1.89193e-05	0.610949	0.999827	0.610949	0.999827		abundance	150	150	pathways
PWY0-1338	Recovery	Recovered	RecoveryRecovered	5.313e-06	7.6291e-07	3.80545e-06	0.613711	0.999827	0.613711	0.999827		abundance	150	150	pathways
HEME-BIOSYNTHESIS-II-1	Recovery	Recovered	RecoveryRecovered	6.77776e-06	7.6291e-07	8.67095e-06	0.613826	0.999827	0.613826	0.999827		abundance	150	150	pathways
CENTFERM-PWY	Recovery	Recovered	RecoveryRecovered	-3.58469e-06	7.6291e-07	2.82414e-06	0.614934	0.999827	0.614934	0.999827		abundance	150	150	pathways
P125-PWY	Recovery	Recovered	RecoveryRecovered	5.26388e-06	7.6291e-07	3.88883e-06	0.618887	0.999827	0.618887	0.999827		abundance	150	150	pathways
POLYISOPRENSYN-PWY	Recovery	Recovered	RecoveryRecovered	6.76551e-06	7.6291e-07	8.93287e-06	0.620222	0.999827	0.620222	0.999827		abundance	150	150	pathways
PWY-6961	Recovery	Recovered	RecoveryRecovered	6.98991e-06	7.6291e-07	9.63391e-06	0.622243	0.999827	0.622243	0.999827		abundance	150	150	pathways
P105-PWY	Recovery	Recovered	RecoveryRecovered	6.55359e-06	7.6291e-07	8.46765e-06	0.622814	0.999827	0.622814	0.999827		abundance	150	150	pathways
PWY-5347	Recovery	Recovered	RecoveryRecovered	9.15472e-06	7.6291e-07	1.50484e-05	0.624557	0.999827	0.624557	0.999827		abundance	150	150	pathways
HISTSYN-PWY	Sex	Female	SexFemale	1.77231e-05	-5.59283e-07	1.82332e-05	0.626726	0.999827	0.626726	0.999827		abundance	150	150	pathways
PWY-6953	Recovery	Recovered	RecoveryRecovered	5.39876e-06	7.6291e-07	4.99446e-06	0.628344	0.999827	0.628344	0.999827		abundance	150	150	pathways
PWY-5030	Recovery	Recovered	RecoveryRecovered	-4.16618e-06	7.6291e-07	6.12921e-06	0.629466	0.999827	0.629466	0.999827		abundance	150	150	pathways
FERMENTATION-PWY	Sex	Female	SexFemale	-1.7408e-05	-5.59283e-07	1.18699e-05	0.629673	0.999827	0.629673	0.999827		abundance	150	150	pathways
PWY-5136	Recovery	Recovered	RecoveryRecovered	9.24135e-06	7.6291e-07	1.55912e-05	0.630486	0.999827	0.630486	0.999827		abundance	150	150	pathways
PWY-7184	Sex	Female	SexFemale	-1.67196e-05	-5.59283e-07	9.32179e-06	0.636122	0.999827	0.636122	0.999827		abundance	150	150	pathways
PWY-3001	Recovery	Recovered	RecoveryRecovered	-8.18555e-06	7.6291e-07	1.71159e-05	0.637471	0.999827	0.637471	0.999827		abundance	150	150	pathways
PWY0-301	Sex	Female	SexFemale	-1.69012e-05	-5.59283e-07	1.11254e-05	0.637621	0.999827	0.637621	0.999827		abundance	150	150	pathways
ORNARGDEG-PWY	Recovery	Recovered	RecoveryRecovered	5.04372e-06	7.6291e-07	4.10416e-06	0.639583	0.999827	0.639583	0.999827		abundance	150	150	pathways
ARGDEG-PWY	Recovery	Recovered	RecoveryRecovered	5.04372e-06	7.6291e-07	4.10416e-06	0.639595	0.999827	0.639595	0.999827		abundance	150	150	pathways
PHOSLIPSYN-PWY	Recovery	Recovered	RecoveryRecovered	-5.42376e-06	7.6291e-07	1.04292e-05	0.64084	0.999827	0.64084	0.999827		abundance	150	150	pathways
PWY-6147	Recovery	Recovered	RecoveryRecovered	-6.31302e-06	7.6291e-07	1.27844e-05	0.641246	0.999827	0.641246	0.999827		abundance	150	150	pathways
PWY-6969	Recovery	Recovered	RecoveryRecovered	6.39972e-06	7.6291e-07	9.04077e-06	0.643894	0.999827	0.643894	0.999827		abundance	150	150	pathways
SALVADEHYPOX-PWY	Sex	Female	SexFemale	-1.81347e-05	-5.59283e-07	1.94004e-05	0.64522	0.999827	0.64522	0.999827		abundance	150	150	pathways
PENTOSE-P-PWY	Recovery	Recovered	RecoveryRecovered	8.3315e-06	7.6291e-07	1.42989e-05	0.646197	0.999827	0.646197	0.999827		abundance	150	150	pathways
METSYN-PWY	Recovery	Recovered	RecoveryRecovered	8.56266e-06	7.6291e-07	1.48812e-05	0.646346	0.999827	0.646346	0.999827		abundance	150	150	pathways
OANTIGEN-PWY	Sex	Female	SexFemale	1.56947e-05	-5.59283e-07	1.45206e-05	0.651003	0.999827	0.651003	0.999827		abundance	150	150	pathways
PWY-5154	Recovery	Recovered	RecoveryRecovered	-5.42129e-06	7.6291e-07	1.09453e-05	0.651006	0.999827	0.651006	0.999827		abundance	150	150	pathways
PWY-6531	Sex	Female	SexFemale	-1.5932e-05	-5.59283e-07	8.97197e-06	0.65176	0.999827	0.65176	0.999827		abundance	150	150	pathways
PWY-6124	Recovery	Recovered	RecoveryRecovered	8.75025e-06	7.6291e-07	1.59452e-05	0.656106	0.999827	0.656106	0.999827		abundance	150	150	pathways
HOMOSER-METSYN-PWY	Recovery	Recovered	RecoveryRecovered	7.18678e-06	7.6291e-07	1.18768e-05	0.656168	0.999827	0.656168	0.999827		abundance	150	150	pathways
PWY-6285	Recovery	Recovered	RecoveryRecovered	6.70688e-06	7.6291e-07	1.05653e-05	0.656595	0.999827	0.656595	0.999827		abundance	150	150	pathways
GLUDEG-I-PWY	Recovery	Recovered	RecoveryRecovered	5.07024e-06	7.6291e-07	5.23039e-06	0.657036	0.999827	0.657036	0.999827		abundance	150	150	pathways
PWY-8187	Sex	Female	SexFemale	-1.56431e-05	-5.59283e-07	9.11886e-06	0.658247	0.999827	0.658247	0.999827		abundance	150	150	pathways
LIPASYN-PWY	Sex	Female	SexFemale	-1.59912e-05	-5.59283e-07	1.1844e-05	0.65864	0.999827	0.65864	0.999827		abundance	150	150	pathways
NONOXIPENT-PWY	Sex	Female	SexFemale	-1.69888e-05	-5.59283e-07	1.75462e-05	0.659254	0.999827	0.659254	0.999827		abundance	150	150	pathways
PWY-5136	Sex	Female	SexFemale	-1.65788e-05	-5.59283e-07	1.55243e-05	0.659409	0.999827	0.659409	0.999827		abundance	150	150	pathways
PWY-6387	Recovery	Recovered	RecoveryRecovered	-8.21434e-06	7.6291e-07	1.87942e-05	0.661773	0.999827	0.661773	0.999827		abundance	150	150	pathways
PWY-7385	Recovery	Recovered	RecoveryRecovered	4.58615e-06	7.6291e-07	3.31994e-06	0.664577	0.999827	0.664577	0.999827		abundance	150	150	pathways
PWY-I9	Recovery	Recovered	RecoveryRecovered	-9.69948e-06	7.6291e-07	2.26868e-05	0.664874	0.999827	0.664874	0.999827		abundance	150	150	pathways
PWY-6803	Recovery	Recovered	RecoveryRecovered	7.14795e-06	7.6291e-07	1.23665e-05	0.666909	0.999827	0.666909	0.999827		abundance	150	150	pathways
PWY-4984	Recovery	Recovered	RecoveryRecovered	6.00657e-06	7.6291e-07	9.07181e-06	0.66779	0.999827	0.66779	0.999827		abundance	150	150	pathways
PWY-6901	Sex	Female	SexFemale	-1.53463e-05	-5.59283e-07	1.04064e-05	0.667914	0.999827	0.667914	0.999827		abundance	150	150	pathways
HOMOSER-METSYN-PWY	Sex	Female	SexFemale	-1.55315e-05	-5.59283e-07	1.18259e-05	0.66813	0.999827	0.66813	0.999827		abundance	150	150	pathways
DAPLYSINESYN-PWY	Sex	Female	SexFemale	-1.69905e-05	-5.59283e-07	1.98383e-05	0.668705	0.999827	0.668705	0.999827		abundance	150	150	pathways
PWY-5415	Recovery	Recovered	RecoveryRecovered	4.37356e-06	7.6291e-07	2.22803e-06	0.669746	0.999827	0.669746	0.999827		abundance	150	150	pathways
PWY0-1479	Sex	Female	SexFemale	-1.55242e-05	-5.59283e-07	1.24558e-05	0.670231	0.999827	0.670231	0.999827		abundance	150	150	pathways
PWY0-166	Sex	Female	SexFemale	-1.50725e-05	-5.59283e-07	9.22127e-06	0.67064	0.999827	0.67064	0.999827		abundance	150	150	pathways
TCA	Sex	Female	SexFemale	-1.50097e-05	-5.59283e-07	9.85293e-06	0.673571	0.999827	0.673571	0.999827		abundance	150	150	pathways
PWY-6609	Sex	Female	SexFemale	1.53536e-05	-5.59283e-07	1.87996e-05	0.674315	0.999827	0.674315	0.999827		abundance	150	150	pathways
GALACT-GLUCUROCAT-PWY	Recovery	Recovered	RecoveryRecovered	-3.05928e-06	7.6291e-07	4.07481e-06	0.675425	0.999827	0.675425	0.999827		abundance	150	150	pathways
GLYCOLYSIS-TCA-GLYOX-BYPASS	Recovery	Recovered	RecoveryRecovered	4.56644e-06	7.6291e-07	3.98666e-06	0.675594	0.999827	0.675594	0.999827		abundance	150	150	pathways
PWY-7688	Recovery	Recovered	RecoveryRecovered	5.00825e-06	7.6291e-07	6.06445e-06	0.676531	0.999827	0.676531	0.999827		abundance	150	150	pathways
PWY-6630	Sex	Female	SexFemale	1.43585e-05	-5.59283e-07	1.41256e-05	0.676634	0.999827	0.676634	0.999827		abundance	150	150	pathways
PWY-6353	Recovery	Recovered	RecoveryRecovered	7.12424e-06	7.6291e-07	1.29105e-05	0.677439	0.999827	0.677439	0.999827		abundance	150	150	pathways
PWY-5855	Recovery	Recovered	RecoveryRecovered	4.26547e-06	7.6291e-07	2.15299e-06	0.678358	0.999827	0.678358	0.999827		abundance	150	150	pathways
DAPLYSINESYN-PWY	Recovery	Recovered	RecoveryRecovered	-8.17371e-06	7.6291e-07	1.99238e-05	0.678551	0.999827	0.678551	0.999827		abundance	150	150	pathways
MET-SAM-PWY	Recovery	Recovered	RecoveryRecovered	7.69285e-06	7.6291e-07	1.45866e-05	0.678845	0.999827	0.678845	0.999827		abundance	150	150	pathways
PWY-6163	Sex	Female	SexFemale	1.49231e-05	-5.59283e-07	1.79805e-05	0.679434	0.999827	0.679434	0.999827		abundance	150	150	pathways
PWY-6961	Sex	Female	SexFemale	-1.45669e-05	-5.59283e-07	9.5926e-06	0.682365	0.999827	0.682365	0.999827		abundance	150	150	pathways
PWY-7208	Recovery	Recovered	RecoveryRecovered	6.44849e-06	7.6291e-07	1.12353e-05	0.682591	0.999827	0.682591	0.999827		abundance	150	150	pathways
PWY-5104	Recovery	Recovered	RecoveryRecovered	4.40782e-06	7.6291e-07	3.89549e-06	0.687118	0.999827	0.687118	0.999827		abundance	150	150	pathways
PWY-922	Recovery	Recovered	RecoveryRecovered	4.37398e-06	7.6291e-07	3.70061e-06	0.687166	0.999827	0.687166	0.999827		abundance	150	150	pathways
PWY-5850	Sex	Female	SexFemale	-1.42477e-05	-5.59283e-07	8.78613e-06	0.687331	0.999827	0.687331	0.999827		abundance	150	150	pathways
PWY-5941	Recovery	Recovered	RecoveryRecovered	-1.0352e-05	7.6291e-07	2.63974e-05	0.688007	0.999827	0.688007	0.999827		abundance	150	150	pathways
HEME-BIOSYNTHESIS-II	Recovery	Recovered	RecoveryRecovered	5.32634e-06	7.6291e-07	7.95682e-06	0.689201	0.999827	0.689201	0.999827		abundance	150	150	pathways
PWY-5973	Recovery	Recovered	RecoveryRecovered	6.16098e-06	7.6291e-07	1.07675e-05	0.689811	0.999827	0.689811	0.999827		abundance	150	150	pathways
PWY-5840	Sex	Female	SexFemale	-1.40579e-05	-5.59283e-07	8.37211e-06	0.690536	0.999827	0.690536	0.999827		abundance	150	150	pathways
PWY-6125	Recovery	Recovered	RecoveryRecovered	6.82715e-06	7.6291e-07	1.28639e-05	0.690925	0.999827	0.690925	0.999827		abundance	150	150	pathways
ORNDEG-PWY	Sex	Female	SexFemale	-1.43968e-05	-5.59283e-07	1.15903e-05	0.691264	0.999827	0.691264	0.999827		abundance	150	150	pathways
PWY-5723	Recovery	Recovered	RecoveryRecovered	7.34538e-06	7.6291e-07	1.4482e-05	0.692473	0.999827	0.692473	0.999827		abundance	150	150	pathways
PWY-7118	Sex	Female	SexFemale	-1.41197e-05	-5.59283e-07	1.00833e-05	0.693176	0.999827	0.693176	0.999827		abundance	150	150	pathways
FAO-PWY	Sex	Female	SexFemale	-1.42592e-05	-5.59283e-07	1.15509e-05	0.694063	0.999827	0.694063	0.999827		abundance	150	150	pathways
PWY-7392	Recovery	Recovered	RecoveryRecovered	4.98973e-06	7.6291e-07	7.004e-06	0.694559	0.999827	0.694559	0.999827		abundance	150	150	pathways
PWY-6969	Sex	Female	SexFemale	-1.38281e-05	-5.59283e-07	9.002e-06	0.696909	0.999827	0.696909	0.999827		abundance	150	150	pathways
PWY-7117	Sex	Female	SexFemale	-1.45933e-05	-5.59283e-07	1.5042e-05	0.69779	0.999827	0.69779	0.999827		abundance	150	150	pathways
PWY-5695	Sex	Female	SexFemale	1.31185e-05	-5.59283e-07	1.31155e-05	0.699055	0.999827	0.699055	0.999827		abundance	150	150	pathways
PWY-7356	Sex	Female	SexFemale	-1.39047e-05	-5.59283e-07	1.09928e-05	0.700104	0.999827	0.700104	0.999827		abundance	150	150	pathways
PWY-5686	Sex	Female	SexFemale	1.41458e-05	-5.59283e-07	1.95551e-05	0.700638	0.999827	0.700638	0.999827		abundance	150	150	pathways
P621-PWY	Recovery	Recovered	RecoveryRecovered	3.98123e-06	7.6291e-07	1.84208e-06	0.70066	0.999827	0.70066	0.999827		abundance	150	150	pathways
PWY-7199	Sex	Female	SexFemale	1.30026e-05	-5.59283e-07	1.2983e-05	0.701086	0.999827	0.701086	0.999827		abundance	150	150	pathways
TCA-GLYOX-BYPASS	Sex	Female	SexFemale	-1.36662e-05	-5.59283e-07	9.94922e-06	0.702614	0.999827	0.702614	0.999827		abundance	150	150	pathways
PWY-5860	Sex	Female	SexFemale	-1.34301e-05	-5.59283e-07	7.87943e-06	0.70324	0.999827	0.70324	0.999827		abundance	150	150	pathways
PWY-561	Sex	Female	SexFemale	-1.35096e-05	-5.59283e-07	1.03805e-05	0.707031	0.999827	0.707031	0.999827		abundance	150	150	pathways
P461-PWY	Sex	Female	SexFemale	-1.40885e-05	-5.59283e-07	1.49057e-05	0.707702	0.999827	0.707702	0.999827		abundance	150	150	pathways
PWY-6396	Recovery	Recovered	RecoveryRecovered	4.11273e-06	7.6291e-07	3.66193e-06	0.708237	0.999827	0.708237	0.999827		abundance	150	150	pathways
PWY-5896	Sex	Female	SexFemale	-1.31719e-05	-5.59283e-07	8.70069e-06	0.710557	0.999827	0.710557	0.999827		abundance	150	150	pathways
PWY0-845	Recovery	Recovered	RecoveryRecovered	5.53587e-06	7.6291e-07	9.94414e-06	0.710945	0.999827	0.710945	0.999827		abundance	150	150	pathways
COMPLETE-ARO-PWY	Sex	Female	SexFemale	1.29166e-05	-5.59283e-07	1.5909e-05	0.712059	0.999827	0.712059	0.999827		abundance	150	150	pathways
PWY-7238	Recovery	Recovered	RecoveryRecovered	-1.09563e-05	7.6291e-07	3.06651e-05	0.712349	0.999827	0.712349	0.999827		abundance	150	150	pathways
GLUCOSE1PMETAB-PWY	Sex	Female	SexFemale	-1.44146e-05	-5.59283e-07	1.8463e-05	0.71323	0.999827	0.71323	0.999827		abundance	150	150	pathways
PWY-6920	Recovery	Recovered	RecoveryRecovered	-2.25548e-06	7.6291e-07	9.00456e-07	0.713318	0.999827	0.713318	0.999827		abundance	150	150	pathways
METHGLYUT-PWY	Recovery	Recovered	RecoveryRecovered	3.86021e-06	7.6291e-07	2.18764e-06	0.714105	0.999827	0.714105	0.999827		abundance	150	150	pathways
PWY-6123	Recovery	Recovered	RecoveryRecovered	6.91559e-06	7.6291e-07	1.47292e-05	0.715171	0.999827	0.715171	0.999827		abundance	150	150	pathways
PWY-5384	Recovery	Recovered	RecoveryRecovered	-7.63314e-06	7.6291e-07	2.1688e-05	0.717516	0.999827	0.717516	0.999827		abundance	150	150	pathways
HISTSYN-PWY	Recovery	Recovered	RecoveryRecovered	-6.43244e-06	7.6291e-07	1.83118e-05	0.720071	0.999827	0.720071	0.999827		abundance	150	150	pathways
PWY-5897	Sex	Female	SexFemale	-1.26902e-05	-5.59283e-07	8.57228e-06	0.720877	0.999827	0.720877	0.999827		abundance	150	150	pathways
PWY-5899	Sex	Female	SexFemale	-1.26902e-05	-5.59283e-07	8.57228e-06	0.72088	0.999827	0.72088	0.999827		abundance	150	150	pathways
PWY-5898	Sex	Female	SexFemale	-1.26902e-05	-5.59283e-07	8.57228e-06	0.720883	0.999827	0.720883	0.999827		abundance	150	150	pathways
PWY-6807	Recovery	Recovered	RecoveryRecovered	-2.2187e-06	7.6291e-07	1.94008e-06	0.722398	0.999827	0.722398	0.999827		abundance	150	150	pathways
P4-PWY	Recovery	Recovered	RecoveryRecovered	6.19017e-06	7.6291e-07	1.29027e-05	0.722566	0.999827	0.722566	0.999827		abundance	150	150	pathways
PWY-5845	Sex	Female	SexFemale	-1.25273e-05	-5.59283e-07	8.45133e-06	0.724239	0.999827	0.724239	0.999827		abundance	150	150	pathways
P41-PWY	Recovery	Recovered	RecoveryRecovered	9.32801e-06	7.6291e-07	2.2872e-05	0.724722	0.999827	0.724722	0.999827		abundance	150	150	pathways
PWY-5345	Recovery	Recovered	RecoveryRecovered	-3.81783e-06	7.6291e-07	1.01415e-05	0.725217	0.999827	0.725217	0.999827		abundance	150	150	pathways
PWY-7228	Recovery	Recovered	RecoveryRecovered	6.26479e-06	7.6291e-07	1.33881e-05	0.726032	0.999827	0.726032	0.999827		abundance	150	150	pathways
THISYNARA-PWY	Recovery	Recovered	RecoveryRecovered	-4.28425e-06	7.6291e-07	1.19853e-05	0.728072	0.999827	0.728072	0.999827		abundance	150	150	pathways
PWY-7456	Recovery	Recovered	RecoveryRecovered	-2.63325e-06	7.6291e-07	5.39785e-06	0.728717	0.999827	0.728717	0.999827		abundance	150	150	pathways
GLCMANNANAUT-PWY	Recovery	Recovered	RecoveryRecovered	-3.9901e-06	7.6291e-07	1.11349e-05	0.730944	0.999827	0.730944	0.999827		abundance	150	150	pathways
ANAGLYCOLYSIS-PWY	Recovery	Recovered	RecoveryRecovered	-4.14441e-06	7.6291e-07	1.16975e-05	0.731094	0.999827	0.731094	0.999827		abundance	150	150	pathways
PWY-5505	Recovery	Recovered	RecoveryRecovered	-2.45887e-06	7.6291e-07	4.68493e-06	0.732208	0.999827	0.732208	0.999827		abundance	150	150	pathways
PWY-5100	Recovery	Recovered	RecoveryRecovered	8.63476e-06	7.6291e-07	2.1828e-05	0.735911	0.999827	0.735911	0.999827		abundance	150	150	pathways
PWY-5861	Sex	Female	SexFemale	-1.20026e-05	-5.59283e-07	8.75607e-06	0.736436	0.999827	0.736436	0.999827		abundance	150	150	pathways
1CMET2-PWY	Recovery	Recovered	RecoveryRecovered	-3.22157e-06	7.6291e-07	8.58311e-06	0.736813	0.999827	0.736813	0.999827		abundance	150	150	pathways
AEROBACTINSYN-PWY	Recovery	Recovered	RecoveryRecovered	3.58878e-06	7.6291e-07	2.16077e-06	0.737968	0.999827	0.737968	0.999827		abundance	150	150	pathways
PWY-6700	Sex	Female	SexFemale	1.21859e-05	-5.59283e-07	1.94717e-05	0.738667	0.999827	0.738667	0.999827		abundance	150	150	pathways
PWY-5862	Sex	Female	SexFemale	-1.1743e-05	-5.59283e-07	7.67109e-06	0.740264	0.999827	0.740264	0.999827		abundance	150	150	pathways
P105-PWY	Sex	Female	SexFemale	-1.17962e-05	-5.59283e-07	8.43134e-06	0.740417	0.999827	0.740417	0.999827		abundance	150	150	pathways
GLYOXYLATE-BYPASS	Sex	Female	SexFemale	-1.18189e-05	-5.59283e-07	9.34677e-06	0.741668	0.999827	0.741668	0.999827		abundance	150	150	pathways
PWY-6519	Recovery	Recovered	RecoveryRecovered	5.41744e-06	7.6291e-07	1.16305e-05	0.743463	0.999827	0.743463	0.999827		abundance	150	150	pathways
PWY-5667	Recovery	Recovered	RecoveryRecovered	-3.97326e-06	7.6291e-07	1.19736e-05	0.744066	0.999827	0.744066	0.999827		abundance	150	150	pathways
PWY-7858	Recovery	Recovered	RecoveryRecovered	4.15981e-06	7.6291e-07	6.46852e-06	0.744466	0.999827	0.744466	0.999827		abundance	150	150	pathways
GLUCARDEG-PWY	Sex	Female	SexFemale	-1.16164e-05	-5.59283e-07	9.62924e-06	0.746708	0.999827	0.746708	0.999827		abundance	150	150	pathways
PWY-6126	Recovery	Recovered	RecoveryRecovered	6.03154e-06	7.6291e-07	1.41778e-05	0.747705	0.999827	0.747705	0.999827		abundance	150	150	pathways
PWY0-1319	Recovery	Recovered	RecoveryRecovered	-3.89029e-06	7.6291e-07	1.19677e-05	0.74832	0.999827	0.74832	0.999827		abundance	150	150	pathways
PWY-5265	Sex	Female	SexFemale	1.1016e-05	-5.59283e-07	1.49164e-05	0.748379	0.999827	0.748379	0.999827		abundance	150	150	pathways
PWY-6305	Sex	Female	SexFemale	-1.14416e-05	-5.59283e-07	8.59282e-06	0.748614	0.999827	0.748614	0.999827		abundance	150	150	pathways
PWY-5838	Sex	Female	SexFemale	-1.14636e-05	-5.59283e-07	9.12807e-06	0.749117	0.999827	0.749117	0.999827		abundance	150	150	pathways
PWY-7761	Sex	Female	SexFemale	-1.13876e-05	-5.59283e-07	8.27824e-06	0.749256	0.999827	0.749256	0.999827		abundance	150	150	pathways
RHAMCAT-PWY	Sex	Female	SexFemale	-1.15317e-05	-5.59283e-07	1.14426e-05	0.75247	0.999827	0.75247	0.999827		abundance	150	150	pathways
PWY-6123	Sex	Female	SexFemale	1.0771e-05	-5.59283e-07	1.4666e-05	0.752853	0.999827	0.752853	0.999827		abundance	150	150	pathways
PWY-6284	Recovery	Recovered	RecoveryRecovered	4.53858e-06	7.6291e-07	8.92915e-06	0.755152	0.999827	0.755152	0.999827		abundance	150	150	pathways
ARO-PWY	Sex	Female	SexFemale	1.08876e-05	-5.59283e-07	1.6398e-05	0.755266	0.999827	0.755266	0.999827		abundance	150	150	pathways
PWY-5667	Sex	Female	SexFemale	1.0309e-05	-5.59283e-07	1.19223e-05	0.755835	0.999827	0.755835	0.999827		abundance	150	150	pathways
SO4ASSIM-PWY	Sex	Female	SexFemale	-1.14097e-05	-5.59283e-07	1.1938e-05	0.756258	0.999827	0.756258	0.999827		abundance	150	150	pathways
PWY0-1319	Sex	Female	SexFemale	1.02798e-05	-5.59283e-07	1.19164e-05	0.756452	0.999827	0.756452	0.999827		abundance	150	150	pathways
PWY-6470	Recovery	Recovered	RecoveryRecovered	3.96798e-06	7.6291e-07	6.43718e-06	0.758013	0.999827	0.758013	0.999827		abundance	150	150	pathways
GLYOXYLATE-BYPASS	Recovery	Recovered	RecoveryRecovered	4.58119e-06	7.6291e-07	9.38702e-06	0.759093	0.999827	0.759093	0.999827		abundance	150	150	pathways
PWY0-1415	Recovery	Recovered	RecoveryRecovered	4.35671e-06	7.6291e-07	8.40522e-06	0.75924	0.999827	0.75924	0.999827		abundance	150	150	pathways
FUC-RHAMCAT-PWY	Sex	Female	SexFemale	-1.09054e-05	-5.59283e-07	7.97761e-06	0.759573	0.999827	0.759573	0.999827		abundance	150	150	pathways
PWY-5676	Recovery	Recovered	RecoveryRecovered	3.61685e-06	7.6291e-07	4.5414e-06	0.760064	0.999827	0.760064	0.999827		abundance	150	150	pathways
PWY-7992	Recovery	Recovered	RecoveryRecovered	-1.98157e-06	7.6291e-07	3.91133e-06	0.761792	0.999827	0.761792	0.999827		abundance	150	150	pathways
REDCITCYC	Recovery	Recovered	RecoveryRecovered	3.4863e-06	7.6291e-07	3.8611e-06	0.763059	0.999827	0.763059	0.999827		abundance	150	150	pathways
PWY-7851	Sex	Female	SexFemale	1.07885e-05	-5.59283e-07	1.87998e-05	0.764392	0.999827	0.764392	0.999827		abundance	150	150	pathways
HEMESYN2-PWY	Recovery	Recovered	RecoveryRecovered	4.52231e-06	7.6291e-07	9.61963e-06	0.765908	0.999827	0.765908	0.999827		abundance	150	150	pathways
PWY-5384	Sex	Female	SexFemale	-1.21552e-05	-5.59283e-07	2.15951e-05	0.768121	0.999827	0.768121	0.999827		abundance	150	150	pathways
PWY-7165	Recovery	Recovered	RecoveryRecovered	3.21366e-06	7.6291e-07	1.69179e-06	0.768827	0.999827	0.768827	0.999827		abundance	150	150	pathways
UNMAPPED	Recovery	Recovered	RecoveryRecovered	-0.00245761	7.6291e-07	0.00839519	0.770064	0.999827	0.770064	0.999827		abundance	150	150	pathways
PWY-5497	Recovery	Recovered	RecoveryRecovered	-1.90102e-06	7.6291e-07	4.07798e-06	0.770373	0.999827	0.770373	0.999827		abundance	150	150	pathways
PWY-7197	Recovery	Recovered	RecoveryRecovered	4.4099e-06	7.6291e-07	9.51246e-06	0.771269	0.999827	0.771269	0.999827		abundance	150	150	pathways
P441-PWY	Sex	Female	SexFemale	-1.06007e-05	-5.59283e-07	1.12354e-05	0.772424	0.999827	0.772424	0.999827		abundance	150	150	pathways
PWY-1042	Sex	Female	SexFemale	1.12628e-05	-5.59283e-07	2.44858e-05	0.77304	0.999827	0.77304	0.999827		abundance	150	150	pathways
PWY-6531	Recovery	Recovered	RecoveryRecovered	-2.74338e-06	7.6291e-07	9.01061e-06	0.773208	0.999827	0.773208	0.999827		abundance	150	150	pathways
BIOTIN-BIOSYNTHESIS-PWY	Recovery	Recovered	RecoveryRecovered	4.69169e-06	7.6291e-07	1.09986e-05	0.774466	0.999827	0.774466	0.999827		abundance	150	150	pathways
PWY-6305	Recovery	Recovered	RecoveryRecovered	4.15955e-06	7.6291e-07	8.62982e-06	0.775092	0.999827	0.775092	0.999827		abundance	150	150	pathways
HEME-BIOSYNTHESIS-II	Sex	Female	SexFemale	-1.01766e-05	-5.59283e-07	7.9227e-06	0.77595	0.999827	0.77595	0.999827		abundance	150	150	pathways
PWY-7199	Recovery	Recovered	RecoveryRecovered	5.13867e-06	7.6291e-07	1.30389e-05	0.776343	0.999827	0.776343	0.999827		abundance	150	150	pathways
PWY-7409	Recovery	Recovered	RecoveryRecovered	3.15997e-06	7.6291e-07	2.17053e-06	0.776624	0.999827	0.776624	0.999827		abundance	150	150	pathways
PWY-6608	Sex	Female	SexFemale	-1.12055e-05	-5.59283e-07	1.85721e-05	0.777917	0.999827	0.777917	0.999827		abundance	150	150	pathways
PWY-6859	Recovery	Recovered	RecoveryRecovered	3.333e-06	7.6291e-07	4.05801e-06	0.778048	0.999827	0.778048	0.999827		abundance	150	150	pathways
PWY-6124	Sex	Female	SexFemale	9.71063e-06	-5.59283e-07	1.58768e-05	0.778395	0.999827	0.778395	0.999827		abundance	150	150	pathways
PWY-4984	Sex	Female	SexFemale	8.86912e-06	-5.59283e-07	9.03291e-06	0.781979	0.999827	0.781979	0.999827		abundance	150	150	pathways
POLYAMSYN-PWY	Recovery	Recovered	RecoveryRecovered	4.09183e-06	7.6291e-07	8.89583e-06	0.782945	0.999827	0.782945	0.999827		abundance	150	150	pathways
AST-PWY	Sex	Female	SexFemale	-9.69379e-06	-5.59283e-07	6.48612e-06	0.784999	0.999827	0.784999	0.999827		abundance	150	150	pathways
PWY-7229	Sex	Female	SexFemale	9.27879e-06	-5.59283e-07	1.52447e-05	0.785923	0.999827	0.785923	0.999827		abundance	150	150	pathways
PWY0-862	Sex	Female	SexFemale	9.00003e-06	-5.59283e-07	1.26889e-05	0.786064	0.999827	0.786064	0.999827		abundance	150	150	pathways
GLCMANNANAUT-PWY	Sex	Female	SexFemale	-9.79826e-06	-5.59283e-07	1.10871e-05	0.789885	0.999827	0.789885	0.999827		abundance	150	150	pathways
PWY-5097	Recovery	Recovered	RecoveryRecovered	-4.41916e-06	7.6291e-07	1.77801e-05	0.791377	0.999827	0.791377	0.999827		abundance	150	150	pathways
PWY-7234	Sex	Female	SexFemale	8.94355e-06	-5.59283e-07	1.55635e-05	0.793811	0.999827	0.793811	0.999827		abundance	150	150	pathways
PWY-6163	Recovery	Recovered	RecoveryRecovered	5.87795e-06	7.6291e-07	1.8058e-05	0.796584	0.999827	0.796584	0.999827		abundance	150	150	pathways
CALVIN-PWY	Recovery	Recovered	RecoveryRecovered	-2.34592e-06	7.6291e-07	8.9052e-06	0.797054	0.999827	0.797054	0.999827		abundance	150	150	pathways
PWY0-1415	Sex	Female	SexFemale	-9.22531e-06	-5.59283e-07	8.36917e-06	0.798223	0.999827	0.798223	0.999827		abundance	150	150	pathways
HEXITOLDEGSUPER-PWY	Sex	Female	SexFemale	-9.29378e-06	-5.59283e-07	9.98906e-06	0.799194	0.999827	0.799194	0.999827		abundance	150	150	pathways
PWY-7229	Recovery	Recovered	RecoveryRecovered	5.18141e-06	7.6291e-07	1.53103e-05	0.799205	0.999827	0.799205	0.999827		abundance	150	150	pathways
COA-PWY	Sex	Female	SexFemale	9.02227e-06	-5.59283e-07	1.85797e-05	0.799641	0.999827	0.799641	0.999827		abundance	150	150	pathways
PWY-6126	Sex	Female	SexFemale	8.44795e-06	-5.59283e-07	1.4117e-05	0.801127	0.999827	0.801127	0.999827		abundance	150	150	pathways
PWY-6703	Sex	Female	SexFemale	8.28113e-06	-5.59283e-07	1.27045e-05	0.80183	0.999827	0.80183	0.999827		abundance	150	150	pathways
HEME-BIOSYNTHESIS-II-1	Sex	Female	SexFemale	-9.07731e-06	-5.59283e-07	8.63377e-06	0.801979	0.999827	0.801979	0.999827		abundance	150	150	pathways
PWY-6992	Recovery	Recovered	RecoveryRecovered	-1.44411e-06	7.6291e-07	3.28895e-06	0.802029	0.999827	0.802029	0.999827		abundance	150	150	pathways
PWY-8004	Sex	Female	SexFemale	-9.08272e-06	-5.59283e-07	9.00017e-06	0.802395	0.999827	0.802395	0.999827		abundance	150	150	pathways
PWY-7790	Sex	Female	SexFemale	9.14718e-06	-5.59283e-07	2.06601e-05	0.802556	0.999827	0.802556	0.999827		abundance	150	150	pathways
PWY-7791	Sex	Female	SexFemale	9.14718e-06	-5.59283e-07	2.06601e-05	0.802564	0.999827	0.802564	0.999827		abundance	150	150	pathways
PWY-7664	Sex	Female	SexFemale	8.25644e-06	-5.59283e-07	1.28934e-05	0.802753	0.999827	0.802753	0.999827		abundance	150	150	pathways
FUCCAT-PWY	Sex	Female	SexFemale	-9.02945e-06	-5.59283e-07	8.45813e-06	0.802816	0.999827	0.802816	0.999827		abundance	150	150	pathways
PWY-5180	Recovery	Recovered	RecoveryRecovered	3.40889e-06	7.6291e-07	6.8973e-06	0.804551	0.999827	0.804551	0.999827		abundance	150	150	pathways
NAGLIPASYN-PWY	Recovery	Recovered	RecoveryRecovered	-2.30641e-06	7.6291e-07	9.37173e-06	0.805074	0.999827	0.805074	0.999827		abundance	150	150	pathways
PWY-8073	Recovery	Recovered	RecoveryRecovered	-2.30641e-06	7.6291e-07	9.37173e-06	0.805097	0.999827	0.805097	0.999827		abundance	150	150	pathways
P42-PWY	Recovery	Recovered	RecoveryRecovered	-1.56561e-06	7.6291e-07	4.73204e-06	0.805119	0.999827	0.805119	0.999827		abundance	150	150	pathways
PEPTIDOGLYCANSYN-PWY	Sex	Female	SexFemale	8.75631e-06	-5.59283e-07	1.86852e-05	0.805356	0.999827	0.805356	0.999827		abundance	150	150	pathways
GLUCUROCAT-PWY	Sex	Female	SexFemale	-8.73411e-06	-5.59283e-07	4.68735e-06	0.80539	0.999827	0.80539	0.999827		abundance	150	150	pathways
LACTOSECAT-PWY	Sex	Female	SexFemale	8.10332e-06	-5.59283e-07	1.26409e-05	0.805608	0.999827	0.805608	0.999827		abundance	150	150	pathways
PWY-6731	Sex	Female	SexFemale	-8.92116e-06	-5.59283e-07	9.02371e-06	0.806099	0.999827	0.806099	0.999827		abundance	150	150	pathways
PWY-7883	Recovery	Recovered	RecoveryRecovered	2.9535e-06	7.6291e-07	3.65098e-06	0.806533	0.999827	0.806533	0.999827		abundance	150	150	pathways
GLUCUROCAT-PWY	Recovery	Recovered	RecoveryRecovered	-1.53938e-06	7.6291e-07	4.70753e-06	0.807022	0.999827	0.807022	0.999827		abundance	150	150	pathways
PWY-6317	Recovery	Recovered	RecoveryRecovered	4.92869e-06	7.6291e-07	1.4962e-05	0.807132	0.999827	0.807132	0.999827		abundance	150	150	pathways
PWY4FS-7	Sex	Female	SexFemale	-8.96887e-06	-5.59283e-07	1.07127e-05	0.80771	0.999827	0.80771	0.999827		abundance	150	150	pathways
PWY4FS-8	Sex	Female	SexFemale	-8.96225e-06	-5.59283e-07	1.07084e-05	0.807846	0.999827	0.807846	0.999827		abundance	150	150	pathways
PWY-5918	Sex	Female	SexFemale	-8.79725e-06	-5.59283e-07	8.48897e-06	0.808153	0.999827	0.808153	0.999827		abundance	150	150	pathways
FASYN-ELONG-PWY	Sex	Female	SexFemale	7.95728e-06	-5.59283e-07	1.29927e-05	0.809503	0.999827	0.809503	0.999827		abundance	150	150	pathways
FUCCAT-PWY	Recovery	Recovered	RecoveryRecovered	-2.07353e-06	7.6291e-07	8.49456e-06	0.809877	0.999827	0.809877	0.999827		abundance	150	150	pathways
PWY-7282	Recovery	Recovered	RecoveryRecovered	-2.31564e-06	7.6291e-07	9.87733e-06	0.810285	0.999827	0.810285	0.999827		abundance	150	150	pathways
PWY-5676	Sex	Female	SexFemale	7.39539e-06	-5.59283e-07	4.52192e-06	0.810398	0.999827	0.810398	0.999827		abundance	150	150	pathways
GLYCOLYSIS-E-D	Sex	Female	SexFemale	-8.68373e-06	-5.59283e-07	8.53406e-06	0.810812	0.999827	0.810812	0.999827		abundance	150	150	pathways
UNINTEGRATED	Recovery	Recovered	RecoveryRecovered	0.00189234	7.6291e-07	0.00789373	0.81095	0.999827	0.81095	0.999827		abundance	150	150	pathways
PWY-6606	Sex	Female	SexFemale	-8.81814e-06	-5.59283e-07	1.0788e-05	0.811215	0.999827	0.811215	0.999827		abundance	150	150	pathways
PWY0-1296	Recovery	Recovered	RecoveryRecovered	6.16556e-06	7.6291e-07	2.12532e-05	0.812671	0.999827	0.812671	0.999827		abundance	150	150	pathways
PWY-5920	Sex	Female	SexFemale	-8.51859e-06	-5.59283e-07	7.35909e-06	0.813087	0.999827	0.813087	0.999827		abundance	150	150	pathways
PWY-7953	Sex	Female	SexFemale	8.12728e-06	-5.59283e-07	1.65192e-05	0.813279	0.999827	0.813279	0.999827		abundance	150	150	pathways
PWY-7211	Sex	Female	SexFemale	-8.43407e-06	-5.59283e-07	6.18352e-06	0.813743	0.999827	0.813743	0.999827		abundance	150	150	pathways
PWY-6435	Sex	Female	SexFemale	-8.36253e-06	-5.59283e-07	4.76064e-06	0.814127	0.999827	0.814127	0.999827		abundance	150	150	pathways
PWY-5837	Sex	Female	SexFemale	-8.43082e-06	-5.59283e-07	6.90018e-06	0.81458	0.999827	0.81458	0.999827		abundance	150	150	pathways
PWY-7242	Sex	Female	SexFemale	-8.32612e-06	-5.59283e-07	4.43846e-06	0.814731	0.999827	0.814731	0.999827		abundance	150	150	pathways
PWY-6386	Sex	Female	SexFemale	8.27161e-06	-5.59283e-07	1.88382e-05	0.81565	0.999827	0.81565	0.999827		abundance	150	150	pathways
ARGSYNBSUB-PWY	Recovery	Recovered	RecoveryRecovered	5.5857e-06	7.6291e-07	1.90147e-05	0.81592	0.999827	0.81592	0.999827		abundance	150	150	pathways
POLYAMSYN-PWY	Sex	Female	SexFemale	-8.40368e-06	-5.59283e-07	8.85769e-06	0.817648	0.999827	0.817648	0.999827		abundance	150	150	pathways
PWY-5154	Sex	Female	SexFemale	-8.53818e-06	-5.59283e-07	1.08984e-05	0.817674	0.999827	0.817674	0.999827		abundance	150	150	pathways
PWY-4041	Sex	Female	SexFemale	-9.43535e-06	-5.59283e-07	2.01113e-05	0.817807	0.999827	0.817807	0.999827		abundance	150	150	pathways
SULFATE-CYS-PWY	Sex	Female	SexFemale	-8.45642e-06	-5.59283e-07	1.10528e-05	0.819765	0.999827	0.819765	0.999827		abundance	150	150	pathways
PWY-8178	Sex	Female	SexFemale	-8.78773e-06	-5.59283e-07	1.52513e-05	0.820293	0.999827	0.820293	0.999827		abundance	150	150	pathways
PWY-5189	Recovery	Recovered	RecoveryRecovered	-1.83511e-06	7.6291e-07	8.07864e-06	0.821134	0.999827	0.821134	0.999827		abundance	150	150	pathways
PWY66-389	Sex	Female	SexFemale	-8.10392e-06	-5.59283e-07	6.07238e-06	0.821308	0.999827	0.821308	0.999827		abundance	150	150	pathways
PWY-7332	Recovery	Recovered	RecoveryRecovered	-1.09776e-06	7.6291e-07	1.69727e-06	0.82343	0.999827	0.82343	0.999827		abundance	150	150	pathways
GLUTORN-PWY	Sex	Female	SexFemale	-8.64463e-06	-5.59283e-07	1.5757e-05	0.824396	0.999827	0.824396	0.999827		abundance	150	150	pathways
PWY-7221	Sex	Female	SexFemale	7.98605e-06	-5.59283e-07	2.01453e-05	0.82456	0.999827	0.82456	0.999827		abundance	150	150	pathways
PWY-5121	Recovery	Recovered	RecoveryRecovered	-1.8186e-06	7.6291e-07	8.36519e-06	0.825295	0.999827	0.825295	0.999827		abundance	150	150	pathways
PWY-6507	Sex	Female	SexFemale	-7.80283e-06	-5.59283e-07	4.497e-06	0.827045	0.999827	0.827045	0.999827		abundance	150	150	pathways
PWY0-1277	Sex	Female	SexFemale	-7.87619e-06	-5.59283e-07	7.02529e-06	0.827561	0.999827	0.827561	0.999827		abundance	150	150	pathways
ARG+POLYAMINE-SYN	Sex	Female	SexFemale	-8.07016e-06	-5.59283e-07	1.07585e-05	0.827985	0.999827	0.827985	0.999827		abundance	150	150	pathways
GLYCOL-GLYOXDEG-PWY	Recovery	Recovered	RecoveryRecovered	-1.03912e-06	7.6291e-07	1.68604e-06	0.828861	0.999827	0.828861	0.999827		abundance	150	150	pathways
PWY-622	Sex	Female	SexFemale	-8.26432e-06	-5.59283e-07	1.3856e-05	0.828914	0.999827	0.828914	0.999827		abundance	150	150	pathways
P23-PWY	Sex	Female	SexFemale	6.5765e-06	-5.59283e-07	4.05707e-06	0.82929	0.999827	0.82929	0.999827		abundance	150	150	pathways
VALSYN-PWY	Sex	Female	SexFemale	-8.68844e-06	-5.59283e-07	1.88112e-05	0.830006	0.999827	0.830006	0.999827		abundance	150	150	pathways
PWY-6895	Sex	Female	SexFemale	-7.91113e-06	-5.59283e-07	1.02071e-05	0.83076	0.999827	0.83076	0.999827		abundance	150	150	pathways
PWY0-42	Sex	Female	SexFemale	-7.6728e-06	-5.59283e-07	5.57482e-06	0.830924	0.999827	0.830924	0.999827		abundance	150	150	pathways
ECASYN-PWY	Recovery	Recovered	RecoveryRecovered	2.60649e-06	7.6291e-07	2.8768e-06	0.831346	0.999827	0.831346	0.999827		abundance	150	150	pathways
PWY4LZ-257	Recovery	Recovered	RecoveryRecovered	-1.89695e-06	7.6291e-07	9.48234e-06	0.831778	0.999827	0.831778	0.999827		abundance	150	150	pathways
GALACTUROCAT-PWY	Recovery	Recovered	RecoveryRecovered	-1.19555e-06	7.6291e-07	4.43037e-06	0.833043	0.999827	0.833043	0.999827		abundance	150	150	pathways
HISDEG-PWY	Recovery	Recovered	RecoveryRecovered	3.29225e-06	7.6291e-07	8.83979e-06	0.833629	0.999827	0.833629	0.999827		abundance	150	150	pathways
P41-PWY	Sex	Female	SexFemale	7.83782e-06	-5.59283e-07	2.2774e-05	0.833678	0.999827	0.833678	0.999827		abundance	150	150	pathways
PWY-6387	Sex	Female	SexFemale	7.35933e-06	-5.59283e-07	1.87136e-05	0.834134	0.999827	0.834134	0.999827		abundance	150	150	pathways
THISYNARA-PWY	Sex	Female	SexFemale	6.74495e-06	-5.59283e-07	1.19339e-05	0.834464	0.999827	0.834464	0.999827		abundance	150	150	pathways
LPSSYN-PWY	Recovery	Recovered	RecoveryRecovered	2.58237e-06	7.6291e-07	3.07115e-06	0.834767	0.999827	0.834767	0.999827		abundance	150	150	pathways
PWY-5837	Recovery	Recovered	RecoveryRecovered	2.99257e-06	7.6291e-07	6.9299e-06	0.835129	0.999827	0.835129	0.999827		abundance	150	150	pathways
PWY-7858	Sex	Female	SexFemale	-7.50172e-06	-5.59283e-07	6.44078e-06	0.835691	0.999827	0.835691	0.999827		abundance	150	150	pathways
PWY-841	Sex	Female	SexFemale	6.67018e-06	-5.59283e-07	1.18834e-05	0.836046	0.999827	0.836046	0.999827		abundance	150	150	pathways
NAD-BIOSYNTHESIS-II	Sex	Female	SexFemale	6.24628e-06	-5.59283e-07	5.11025e-06	0.837781	0.999827	0.837781	0.999827		abundance	150	150	pathways
HCAMHPDEG-PWY	Sex	Female	SexFemale	-7.3808e-06	-5.59283e-07	6.07416e-06	0.838184	0.999827	0.838184	0.999827		abundance	150	150	pathways
PWY-6690	Sex	Female	SexFemale	-7.3808e-06	-5.59283e-07	6.07416e-06	0.838184	0.999827	0.838184	0.999827		abundance	150	150	pathways
PWY-6282	Sex	Female	SexFemale	6.6314e-06	-5.59283e-07	1.28257e-05	0.838434	0.999827	0.838434	0.999827		abundance	150	150	pathways
PWY-8190	Recovery	Recovered	RecoveryRecovered	-8.95967e-07	7.6291e-07	5.53089e-07	0.839355	0.999827	0.839355	0.999827		abundance	150	150	pathways
PWY-5100	Sex	Female	SexFemale	7.4253e-06	-5.59283e-07	2.17344e-05	0.839417	0.999827	0.839417	0.999827		abundance	150	150	pathways
PWY-7942	Sex	Female	SexFemale	-7.30146e-06	-5.59283e-07	5.54106e-06	0.839599	0.999827	0.839599	0.999827		abundance	150	150	pathways
DARABCATK12-PWY	Recovery	Recovered	RecoveryRecovered	-9.17893e-07	7.6291e-07	1.56668e-06	0.839777	0.999827	0.839777	0.999827		abundance	150	150	pathways
OANTIGEN-PWY	Recovery	Recovered	RecoveryRecovered	4.13042e-06	7.6291e-07	1.45831e-05	0.840474	0.999827	0.840474	0.999827		abundance	150	150	pathways
PWY-6906	Recovery	Recovered	RecoveryRecovered	-9.42963e-07	7.6291e-07	2.28019e-06	0.840511	0.999827	0.840511	0.999827		abundance	150	150	pathways
PWY66-391	Recovery	Recovered	RecoveryRecovered	-9.08239e-07	7.6291e-07	1.58419e-06	0.840743	0.999827	0.840743	0.999827		abundance	150	150	pathways
PWY-5656	Sex	Female	SexFemale	-7.23931e-06	-5.59283e-07	5.39585e-06	0.840945	0.999827	0.840945	0.999827		abundance	150	150	pathways
PWY-6731	Recovery	Recovered	RecoveryRecovered	3.20581e-06	7.6291e-07	9.06257e-06	0.841364	0.999827	0.841364	0.999827		abundance	150	150	pathways
PWY0-1479	Recovery	Recovered	RecoveryRecovered	-2.22692e-06	7.6291e-07	1.25095e-05	0.841493	0.999827	0.841493	0.999827		abundance	150	150	pathways
LIPA-CORESYN-PWY	Recovery	Recovered	RecoveryRecovered	2.47789e-06	7.6291e-07	2.73702e-06	0.842128	0.999827	0.842128	0.999827		abundance	150	150	pathways
PWY-822	Recovery	Recovered	RecoveryRecovered	2.41787e-06	7.6291e-07	1.54787e-06	0.842144	0.999827	0.842144	0.999827		abundance	150	150	pathways
PWY-6113	Recovery	Recovered	RecoveryRecovered	-9.07929e-07	7.6291e-07	2.03331e-06	0.842581	0.999827	0.842581	0.999827		abundance	150	150	pathways
PWY-5367	Recovery	Recovered	RecoveryRecovered	2.66597e-06	7.6291e-07	5.03743e-06	0.842777	0.999827	0.842777	0.999827		abundance	150	150	pathways
PWY-7204	Sex	Female	SexFemale	-7.11095e-06	-5.59283e-07	4.61981e-06	0.84342	0.999827	0.84342	0.999827		abundance	150	150	pathways
PWY0-162	Recovery	Recovered	RecoveryRecovered	-1.86083e-06	7.6291e-07	1.04884e-05	0.843631	0.999827	0.843631	0.999827		abundance	150	150	pathways
CALVIN-PWY	Sex	Female	SexFemale	6.15179e-06	-5.59283e-07	8.86701e-06	0.843633	0.999827	0.843633	0.999827		abundance	150	150	pathways
PWY-6507	Recovery	Recovered	RecoveryRecovered	2.59744e-06	7.6291e-07	4.51637e-06	0.844143	0.999827	0.844143	0.999827		abundance	150	150	pathways
PWY-7371	Recovery	Recovered	RecoveryRecovered	-9.61326e-07	7.6291e-07	3.25675e-06	0.844482	0.999827	0.844482	0.999827		abundance	150	150	pathways
UDPNACETYLGALSYN-PWY	Recovery	Recovered	RecoveryRecovered	2.40249e-06	7.6291e-07	1.866e-06	0.844788	0.999827	0.844788	0.999827		abundance	150	150	pathways
PWY-6122	Recovery	Recovered	RecoveryRecovered	-2.75024e-06	7.6291e-07	1.59889e-05	0.84502	0.999827	0.84502	0.999827		abundance	150	150	pathways
PWY-6277	Recovery	Recovered	RecoveryRecovered	-2.75024e-06	7.6291e-07	1.59889e-05	0.845043	0.999827	0.845043	0.999827		abundance	150	150	pathways
PWY-6151	Recovery	Recovered	RecoveryRecovered	5.04917e-06	7.6291e-07	2.04188e-05	0.845663	0.999827	0.845663	0.999827		abundance	150	150	pathways
PWY-241	Sex	Female	SexFemale	6.12022e-06	-5.59283e-07	1.01034e-05	0.845897	0.999827	0.845897	0.999827		abundance	150	150	pathways
PWY-6607	Sex	Female	SexFemale	-7.21062e-06	-5.59283e-07	9.68056e-06	0.845998	0.999827	0.845998	0.999827		abundance	150	150	pathways
PWY-7222	Sex	Female	SexFemale	6.19016e-06	-5.59283e-07	1.2345e-05	0.847482	0.999827	0.847482	0.999827		abundance	150	150	pathways
PWY-7220	Sex	Female	SexFemale	6.19016e-06	-5.59283e-07	1.2345e-05	0.847488	0.999827	0.847488	0.999827		abundance	150	150	pathways
GLYCOLYSIS	Sex	Female	SexFemale	-7.12326e-06	-5.59283e-07	9.29308e-06	0.847524	0.999827	0.847524	0.999827		abundance	150	150	pathways
LPSSYN-PWY	Sex	Female	SexFemale	-6.88737e-06	-5.59283e-07	3.05798e-06	0.847872	0.999827	0.847872	0.999827		abundance	150	150	pathways
PWY-6612	Sex	Female	SexFemale	6.0816e-06	-5.59283e-07	1.17855e-05	0.849088	0.999827	0.849088	0.999827		abundance	150	150	pathways
PWY-7316	Sex	Female	SexFemale	-6.89671e-06	-5.59283e-07	6.98344e-06	0.850312	0.999827	0.850312	0.999827		abundance	150	150	pathways
COBALSYN-PWY	Recovery	Recovered	RecoveryRecovered	-1.17329e-06	7.6291e-07	6.32869e-06	0.851363	0.999827	0.851363	0.999827		abundance	150	150	pathways
P161-PWY	Sex	Female	SexFemale	-7.29758e-06	-5.59283e-07	1.54679e-05	0.852793	0.999827	0.852793	0.999827		abundance	150	150	pathways
ASPASN-PWY	Recovery	Recovered	RecoveryRecovered	3.31095e-06	7.6291e-07	1.10842e-05	0.853273	0.999827	0.853273	0.999827		abundance	150	150	pathways
PWY-7268	Recovery	Recovered	RecoveryRecovered	2.30009e-06	7.6291e-07	1.6506e-06	0.853585	0.999827	0.853585	0.999827		abundance	150	150	pathways
GALACTARDEG-PWY	Recovery	Recovered	RecoveryRecovered	3.86864e-06	7.6291e-07	1.47108e-05	0.853691	0.999827	0.853691	0.999827		abundance	150	150	pathways
GLUCARGALACTSUPER-PWY	Recovery	Recovered	RecoveryRecovered	3.86864e-06	7.6291e-07	1.47108e-05	0.853693	0.999827	0.853693	0.999827		abundance	150	150	pathways
PWY-6270	Recovery	Recovered	RecoveryRecovered	-1.49889e-06	7.6291e-07	9.14563e-06	0.853727	0.999827	0.853727	0.999827		abundance	150	150	pathways
P185-PWY	Recovery	Recovered	RecoveryRecovered	2.47073e-06	7.6291e-07	4.63248e-06	0.855655	0.999827	0.855655	0.999827		abundance	150	150	pathways
PWY66-389	Recovery	Recovered	RecoveryRecovered	-1.081e-06	7.6291e-07	6.09853e-06	0.856463	0.999827	0.856463	0.999827		abundance	150	150	pathways
PWY-5022	Recovery	Recovered	RecoveryRecovered	-1.02239e-06	7.6291e-07	5.57033e-06	0.856695	0.999827	0.856695	0.999827		abundance	150	150	pathways
SER-GLYSYN-PWY	Recovery	Recovered	RecoveryRecovered	-2.5227e-06	7.6291e-07	1.62683e-05	0.85691	0.999827	0.85691	0.999827		abundance	150	150	pathways
PWY-6328	Recovery	Recovered	RecoveryRecovered	-7.33628e-07	7.6291e-07	1.52103e-06	0.856984	0.999827	0.856984	0.999827		abundance	150	150	pathways
UDPNAGSYN-PWY	Sex	Female	SexFemale	-7.51437e-06	-5.59283e-07	2.0745e-05	0.85797	0.999827	0.85797	0.999827		abundance	150	150	pathways
PWY-5971	Sex	Female	SexFemale	5.71967e-06	-5.59283e-07	1.30346e-05	0.858992	0.999827	0.858992	0.999827		abundance	150	150	pathways
PWY-6122	Sex	Female	SexFemale	5.89786e-06	-5.59283e-07	1.59204e-05	0.859614	0.999827	0.859614	0.999827		abundance	150	150	pathways
PWY-6277	Sex	Female	SexFemale	5.89786e-06	-5.59283e-07	1.59204e-05	0.859618	0.999827	0.859618	0.999827		abundance	150	150	pathways
PWY66-430	Recovery	Recovered	RecoveryRecovered	-9.78279e-07	7.6291e-07	5.52756e-06	0.859859	0.999827	0.859859	0.999827		abundance	150	150	pathways
PWY-6292	Recovery	Recovered	RecoveryRecovered	2.36437e-06	7.6291e-07	4.04741e-06	0.860517	0.999827	0.860517	0.999827		abundance	150	150	pathways
PWY-5686	Recovery	Recovered	RecoveryRecovered	-2.94975e-06	7.6291e-07	1.96394e-05	0.861604	0.999827	0.861604	0.999827		abundance	150	150	pathways
PWY-5005	Recovery	Recovered	RecoveryRecovered	2.39855e-06	7.6291e-07	4.70575e-06	0.862232	0.999827	0.862232	0.999827		abundance	150	150	pathways
PWY-6607	Recovery	Recovered	RecoveryRecovered	2.96315e-06	7.6291e-07	9.72225e-06	0.862493	0.999827	0.862493	0.999827		abundance	150	150	pathways
GALACTITOLCAT-PWY	Sex	Female	SexFemale	-6.36923e-06	-5.59283e-07	6.94315e-06	0.862603	0.999827	0.862603	0.999827		abundance	150	150	pathways
ARG+POLYAMINE-SYN	Recovery	Recovered	RecoveryRecovered	3.10315e-06	7.6291e-07	1.08048e-05	0.862932	0.999827	0.862932	0.999827		abundance	150	150	pathways
PWY0-461	Recovery	Recovered	RecoveryRecovered	-6.76121e-07	7.6291e-07	1.70458e-06	0.863011	0.999827	0.863011	0.999827		abundance	150	150	pathways
GALACTUROCAT-PWY	Sex	Female	SexFemale	-6.27661e-06	-5.59283e-07	4.41138e-06	0.863029	0.999827	0.863029	0.999827		abundance	150	150	pathways
PWY-6749	Sex	Female	SexFemale	5.13905e-06	-5.59283e-07	3.52694e-06	0.863043	0.999827	0.863043	0.999827		abundance	150	150	pathways
PWY-6891	Recovery	Recovered	RecoveryRecovered	-6.42935e-07	7.6291e-07	6.63095e-07	0.863728	0.999827	0.863728	0.999827		abundance	150	150	pathways
PWY490-3	Recovery	Recovered	RecoveryRecovered	-6.30521e-07	7.6291e-07	4.29633e-07	0.864665	0.999827	0.864665	0.999827		abundance	150	150	pathways
PWY-6471	Sex	Female	SexFemale	-6.23703e-06	-5.59283e-07	5.81183e-06	0.864839	0.999827	0.864839	0.999827		abundance	150	150	pathways
PWY-5189	Sex	Female	SexFemale	-6.31374e-06	-5.59283e-07	8.04399e-06	0.86488	0.999827	0.86488	0.999827		abundance	150	150	pathways
PWY-7210	Sex	Female	SexFemale	-6.21582e-06	-5.59283e-07	5.26689e-06	0.864974	0.999827	0.864974	0.999827		abundance	150	150	pathways
PWY-7851	Recovery	Recovered	RecoveryRecovered	4.25378e-06	7.6291e-07	1.88807e-05	0.865403	0.999827	0.865403	0.999827		abundance	150	150	pathways
KETOGLUCONMET-PWY	Recovery	Recovered	RecoveryRecovered	2.49073e-06	7.6291e-07	6.12928e-06	0.865651	0.999827	0.865651	0.999827		abundance	150	150	pathways
PWY-4041	Recovery	Recovered	RecoveryRecovered	-2.91672e-06	7.6291e-07	2.01979e-05	0.866029	0.999827	0.866029	0.999827		abundance	150	150	pathways
RUMP-PWY	Recovery	Recovered	RecoveryRecovered	2.15583e-06	7.6291e-07	1.30136e-06	0.866205	0.999827	0.866205	0.999827		abundance	150	150	pathways
PWY-7315	Recovery	Recovered	RecoveryRecovered	2.40888e-06	7.6291e-07	5.44968e-06	0.866859	0.999827	0.866859	0.999827		abundance	150	150	pathways
P162-PWY	Recovery	Recovered	RecoveryRecovered	-6.05453e-07	7.6291e-07	3.26531e-07	0.866998	0.999827	0.866998	0.999827		abundance	150	150	pathways
FOLSYN-PWY	Sex	Female	SexFemale	5.31233e-06	-5.59283e-07	1.24128e-05	0.867211	0.999827	0.867211	0.999827		abundance	150	150	pathways
PWY-5030	Sex	Female	SexFemale	5.01434e-06	-5.59283e-07	6.10293e-06	0.867496	0.999827	0.867496	0.999827		abundance	150	150	pathways
PWY-7115	Sex	Female	SexFemale	-6.12941e-06	-5.59283e-07	6.88281e-06	0.868173	0.999827	0.868173	0.999827		abundance	150	150	pathways
LIPA-CORESYN-PWY	Sex	Female	SexFemale	-6.01599e-06	-5.59283e-07	2.72529e-06	0.868497	0.999827	0.868497	0.999827		abundance	150	150	pathways
PWY-7208	Sex	Female	SexFemale	5.17232e-06	-5.59283e-07	1.11871e-05	0.868809	0.999827	0.868809	0.999827		abundance	150	150	pathways
GLYCOCAT-PWY	Sex	Female	SexFemale	-6.42844e-06	-5.59283e-07	1.35714e-05	0.868846	0.999827	0.868846	0.999827		abundance	150	150	pathways
PWY-7345	Sex	Female	SexFemale	-6.22716e-06	-5.59283e-07	1.02798e-05	0.869202	0.999827	0.869202	0.999827		abundance	150	150	pathways
PWY-7883	Sex	Female	SexFemale	4.86079e-06	-5.59283e-07	3.63533e-06	0.869717	0.999827	0.869717	0.999827		abundance	150	150	pathways
COA-PWY-1	Sex	Female	SexFemale	5.56504e-06	-5.59283e-07	1.79069e-05	0.869997	0.999827	0.869997	0.999827		abundance	150	150	pathways
ARGININE-SYN4-PWY	Recovery	Recovered	RecoveryRecovered	-1.50173e-06	7.6291e-07	1.11791e-05	0.870141	0.999827	0.870141	0.999827		abundance	150	150	pathways
GALACT-GLUCUROCAT-PWY	Sex	Female	SexFemale	-5.95251e-06	-5.59283e-07	4.05734e-06	0.870544	0.999827	0.870544	0.999827		abundance	150	150	pathways
PWY-7664	Recovery	Recovered	RecoveryRecovered	3.24515e-06	7.6291e-07	1.2949e-05	0.871311	0.999827	0.871311	0.999827		abundance	150	150	pathways
PWY0-42	Recovery	Recovered	RecoveryRecovered	-8.24842e-07	7.6291e-07	5.59882e-06	0.872607	0.999827	0.872607	0.999827		abundance	150	150	pathways
HEMESYN2-PWY	Sex	Female	SexFemale	-6.04247e-06	-5.59283e-07	9.57838e-06	0.87268	0.999827	0.87268	0.999827		abundance	150	150	pathways
PWY0-1261	Sex	Female	SexFemale	-6.04463e-06	-5.59283e-07	9.7363e-06	0.872796	0.999827	0.872796	0.999827		abundance	150	150	pathways
KDO-NAGLIPASYN-PWY	Recovery	Recovered	RecoveryRecovered	2.10288e-06	7.6291e-07	2.08789e-06	0.873656	0.999827	0.873656	0.999827		abundance	150	150	pathways
PWY-6936	Sex	Female	SexFemale	-6.08525e-06	-5.59283e-07	1.33857e-05	0.876211	0.999827	0.876211	0.999827		abundance	150	150	pathways
PWY-5850	Recovery	Recovered	RecoveryRecovered	2.63338e-06	7.6291e-07	8.82397e-06	0.876426	0.999827	0.876426	0.999827		abundance	150	150	pathways
PWY-6285	Sex	Female	SexFemale	-5.91454e-06	-5.59283e-07	1.052e-05	0.876616	0.999827	0.876616	0.999827		abundance	150	150	pathways
FASYN-ELONG-PWY	Recovery	Recovered	RecoveryRecovered	3.12128e-06	7.6291e-07	1.30486e-05	0.878351	0.999827	0.878351	0.999827		abundance	150	150	pathways
PWY-7807	Recovery	Recovered	RecoveryRecovered	2.02458e-06	7.6291e-07	1.36203e-06	0.878849	0.999827	0.878849	0.999827		abundance	150	150	pathways
PWY-6125	Sex	Female	SexFemale	4.80193e-06	-5.59283e-07	1.28088e-05	0.879145	0.999827	0.879145	0.999827		abundance	150	150	pathways
PWY3O-4107	Recovery	Recovered	RecoveryRecovered	-9.15486e-07	7.6291e-07	7.48328e-06	0.879581	0.999827	0.879581	0.999827		abundance	150	150	pathways
PWY-5656	Recovery	Recovered	RecoveryRecovered	2.24753e-06	7.6291e-07	5.41909e-06	0.879617	0.999827	0.879617	0.999827		abundance	150	150	pathways
PWY-5690	Sex	Female	SexFemale	4.44925e-06	-5.59283e-07	4.47411e-06	0.879899	0.999827	0.879899	0.999827		abundance	150	150	pathways
AST-PWY	Recovery	Recovered	RecoveryRecovered	2.34037e-06	7.6291e-07	6.51405e-06	0.879991	0.999827	0.879991	0.999827		abundance	150	150	pathways
PWY-6284	Sex	Female	SexFemale	-5.65553e-06	-5.59283e-07	8.89086e-06	0.880952	0.999827	0.880952	0.999827		abundance	150	150	pathways
PWY-6906	Sex	Female	SexFemale	4.36883e-06	-5.59283e-07	2.27042e-06	0.881011	0.999827	0.881011	0.999827		abundance	150	150	pathways
PWY-7254	Recovery	Recovered	RecoveryRecovered	-6.23019e-07	7.6291e-07	4.38609e-06	0.881133	0.999827	0.881133	0.999827		abundance	150	150	pathways
PYRIDOXSYN-PWY	Sex	Female	SexFemale	-5.64324e-06	-5.59283e-07	8.9283e-06	0.88127	0.999827	0.88127	0.999827		abundance	150	150	pathways
ALLANTOINDEG-PWY	Recovery	Recovered	RecoveryRecovered	1.99314e-06	7.6291e-07	1.11971e-06	0.881323	0.999827	0.881323	0.999827		abundance	150	150	pathways
PWY-6147	Sex	Female	SexFemale	4.68889e-06	-5.59283e-07	1.27296e-05	0.881581	0.999827	0.881581	0.999827		abundance	150	150	pathways
P23-PWY	Recovery	Recovered	RecoveryRecovered	-5.91317e-07	7.6291e-07	4.07454e-06	0.88202	0.999827	0.88202	0.999827		abundance	150	150	pathways
SER-GLYSYN-PWY	Sex	Female	SexFemale	-5.98121e-06	-5.59283e-07	1.61985e-05	0.882331	0.999827	0.882331	0.999827		abundance	150	150	pathways
PWY-7282	Sex	Female	SexFemale	4.47844e-06	-5.59283e-07	9.83497e-06	0.883191	0.999827	0.883191	0.999827		abundance	150	150	pathways
PWY-7446	Sex	Female	SexFemale	-5.38102e-06	-5.59283e-07	2.05786e-06	0.883512	0.999827	0.883512	0.999827		abundance	150	150	pathways
PWY-3781	Recovery	Recovered	RecoveryRecovered	-4.33935e-07	7.6291e-07	2.6766e-07	0.883513	0.999827	0.883513	0.999827		abundance	150	150	pathways
PWY-6897	Sex	Female	SexFemale	4.36093e-06	-5.59283e-07	8.93436e-06	0.885072	0.999827	0.885072	0.999827		abundance	150	150	pathways
PWY66-430	Sex	Female	SexFemale	4.24834e-06	-5.59283e-07	5.50385e-06	0.885215	0.999827	0.885215	0.999827		abundance	150	150	pathways
PWY-6823	Sex	Female	SexFemale	4.31339e-06	-5.59283e-07	8.17745e-06	0.885536	0.999827	0.885536	0.999827		abundance	150	150	pathways
REDCITCYC	Sex	Female	SexFemale	4.19521e-06	-5.59283e-07	3.84454e-06	0.885678	0.999827	0.885678	0.999827		abundance	150	150	pathways
NAGLIPASYN-PWY	Sex	Female	SexFemale	-5.44159e-06	-5.59283e-07	9.33155e-06	0.886306	0.999827	0.886306	0.999827		abundance	150	150	pathways
PWY-8073	Sex	Female	SexFemale	-5.44159e-06	-5.59283e-07	9.33155e-06	0.886306	0.999827	0.886306	0.999827		abundance	150	150	pathways
PWY-5138	Sex	Female	SexFemale	-5.30192e-06	-5.59283e-07	4.96167e-06	0.886466	0.999827	0.886466	0.999827		abundance	150	150	pathways
PWY-6470	Sex	Female	SexFemale	-5.29806e-06	-5.59283e-07	6.40957e-06	0.88739	0.999827	0.88739	0.999827		abundance	150	150	pathways
PWY-5484	Sex	Female	SexFemale	-5.38274e-06	-5.59283e-07	9.42566e-06	0.887751	0.999827	0.887751	0.999827		abundance	150	150	pathways
P122-PWY	Sex	Female	SexFemale	-5.22696e-06	-5.59283e-07	3.94314e-06	0.88779	0.999827	0.88779	0.999827		abundance	150	150	pathways
PWY-7228	Sex	Female	SexFemale	4.43863e-06	-5.59283e-07	1.33306e-05	0.887892	0.999827	0.887892	0.999827		abundance	150	150	pathways
PWY-7383	Recovery	Recovered	RecoveryRecovered	-4.40861e-07	7.6291e-07	2.98498e-06	0.889861	0.999827	0.889861	0.999827		abundance	150	150	pathways
PWY-6138	Recovery	Recovered	RecoveryRecovered	-3.64938e-07	7.6291e-07	2.00297e-07	0.890157	0.999827	0.890157	0.999827		abundance	150	150	pathways
SO4ASSIM-PWY	Recovery	Recovered	RecoveryRecovered	2.76705e-06	7.6291e-07	1.19894e-05	0.890203	0.999827	0.890203	0.999827		abundance	150	150	pathways
UBISYN-PWY	Recovery	Recovered	RecoveryRecovered	1.8945e-06	7.6291e-07	1.16941e-06	0.890864	0.999827	0.890864	0.999827		abundance	150	150	pathways
PWY-3001	Sex	Female	SexFemale	4.51827e-06	-5.59283e-07	1.70425e-05	0.890886	0.999827	0.890886	0.999827		abundance	150	150	pathways
PWY-8131	Sex	Female	SexFemale	3.94908e-06	-5.59283e-07	3.2121e-06	0.891335	0.999827	0.891335	0.999827		abundance	150	150	pathways
PWY-7279	Recovery	Recovered	RecoveryRecovered	-3.44814e-07	7.6291e-07	1.99692e-07	0.892104	0.999827	0.892104	0.999827		abundance	150	150	pathways
PWY-6700	Recovery	Recovered	RecoveryRecovered	-2.11009e-06	7.6291e-07	1.95556e-05	0.892289	0.999827	0.892289	0.999827		abundance	150	150	pathways
PWY-6992	Sex	Female	SexFemale	-5.01261e-06	-5.59283e-07	3.27485e-06	0.892674	0.999827	0.892674	0.999827		abundance	150	150	pathways
GLUCARDEG-PWY	Recovery	Recovered	RecoveryRecovered	2.47124e-06	7.6291e-07	9.67071e-06	0.892714	0.999827	0.892714	0.999827		abundance	150	150	pathways
PWY-5840	Recovery	Recovered	RecoveryRecovered	2.34208e-06	7.6291e-07	8.40816e-06	0.892866	0.999827	0.892866	0.999827		abundance	150	150	pathways
PWY-7245	Recovery	Recovered	RecoveryRecovered	1.86237e-06	7.6291e-07	1.09075e-06	0.893813	0.999827	0.893813	0.999827		abundance	150	150	pathways
TRNA-CHARGING-PWY	Recovery	Recovered	RecoveryRecovered	-1.39881e-06	7.6291e-07	1.40805e-05	0.894438	0.999827	0.894438	0.999827		abundance	150	150	pathways
PWY-5156	Recovery	Recovered	RecoveryRecovered	-3.09612e-07	7.6291e-07	2.79427e-07	0.895541	0.999827	0.895541	0.999827		abundance	150	150	pathways
PWY-5464	Recovery	Recovered	RecoveryRecovered	-4.20567e-07	7.6291e-07	3.82716e-06	0.895581	0.999827	0.895581	0.999827		abundance	150	150	pathways
PWY1ZNC-1	Sex	Female	SexFemale	-4.96673e-06	-5.59283e-07	7.01759e-06	0.895595	0.999827	0.895595	0.999827		abundance	150	150	pathways
PWY-7356	Recovery	Recovered	RecoveryRecovered	-1.02123e-06	7.6291e-07	1.10401e-05	0.896698	0.999827	0.896698	0.999827		abundance	150	150	pathways
PWY0-1298	Sex	Female	SexFemale	-5.02348e-06	-5.59283e-07	1.0676e-05	0.89716	0.999827	0.89716	0.999827		abundance	150	150	pathways
PWY-7187	Sex	Female	SexFemale	-4.83405e-06	-5.59283e-07	5.35216e-06	0.897786	0.999827	0.897786	0.999827		abundance	150	150	pathways
PWY-5972	Recovery	Recovered	RecoveryRecovered	-2.8966e-07	7.6291e-07	7.06504e-07	0.897794	0.999827	0.897794	0.999827		abundance	150	150	pathways
PWY-6549	Sex	Female	SexFemale	-4.91213e-06	-5.59283e-07	8.34121e-06	0.897796	0.999827	0.897796	0.999827		abundance	150	150	pathways
PWY-7200	Sex	Female	SexFemale	3.63947e-06	-5.59283e-07	2.1101e-06	0.898483	0.999827	0.898483	0.999827		abundance	150	150	pathways
PWY0-781	Recovery	Recovered	RecoveryRecovered	2.63846e-06	7.6291e-07	1.23007e-05	0.899005	0.999827	0.899005	0.999827		abundance	150	150	pathways
PWY-621	Sex	Female	SexFemale	4.00919e-06	-5.59283e-07	1.58978e-05	0.900387	0.999827	0.900387	0.999827		abundance	150	150	pathways
ORNARGDEG-PWY	Sex	Female	SexFemale	-4.69528e-06	-5.59283e-07	4.08656e-06	0.900551	0.999827	0.900551	0.999827		abundance	150	150	pathways
ARGDEG-PWY	Sex	Female	SexFemale	-4.69528e-06	-5.59283e-07	4.08656e-06	0.900552	0.999827	0.900552	0.999827		abundance	150	150	pathways
PWY-5860	Recovery	Recovered	RecoveryRecovered	2.18409e-06	7.6291e-07	7.91336e-06	0.900569	0.999827	0.900569	0.999827		abundance	150	150	pathways
PWY-7663	Sex	Female	SexFemale	3.81866e-06	-5.59283e-07	1.31463e-05	0.901527	0.999827	0.901527	0.999827		abundance	150	150	pathways
PWY-7736	Recovery	Recovered	RecoveryRecovered	-2.46026e-07	7.6291e-07	2.15733e-07	0.901679	0.999827	0.901679	0.999827		abundance	150	150	pathways
PWY-5103	Sex	Female	SexFemale	4.01035e-06	-5.59283e-07	1.71066e-05	0.901822	0.999827	0.901822	0.999827		abundance	150	150	pathways
PWY-5415	Sex	Female	SexFemale	3.50037e-06	-5.59283e-07	2.21847e-06	0.90185	0.999827	0.90185	0.999827		abundance	150	150	pathways
PWY-7294	Recovery	Recovered	RecoveryRecovered	1.77363e-06	7.6291e-07	1.00474e-06	0.902203	0.999827	0.902203	0.999827		abundance	150	150	pathways
PWY-7874	Recovery	Recovered	RecoveryRecovered	-2.44419e-07	7.6291e-07	1.18774e-06	0.902812	0.999827	0.902812	0.999827		abundance	150	150	pathways
PWY-6478	Recovery	Recovered	RecoveryRecovered	-2.55137e-07	7.6291e-07	1.84057e-06	0.903173	0.999827	0.903173	0.999827		abundance	150	150	pathways
PWY-6608	Recovery	Recovered	RecoveryRecovered	-1.69183e-06	7.6291e-07	1.8652e-05	0.904146	0.999827	0.904146	0.999827		abundance	150	150	pathways
PWY0-862	Recovery	Recovered	RecoveryRecovered	2.57928e-06	7.6291e-07	1.27435e-05	0.904544	0.999827	0.904544	0.999827		abundance	150	150	pathways
PWY-6545	Sex	Female	SexFemale	-4.58963e-06	-5.59283e-07	7.12576e-06	0.904549	0.999827	0.904549	0.999827		abundance	150	150	pathways
PWY-7197	Sex	Female	SexFemale	3.53617e-06	-5.59283e-07	9.47168e-06	0.904639	0.999827	0.904639	0.999827		abundance	150	150	pathways
PPGPPMET-PWY	Recovery	Recovered	RecoveryRecovered	1.91901e-06	7.6291e-07	5.17787e-06	0.904827	0.999827	0.904827	0.999827		abundance	150	150	pathways
PWY-7290	Recovery	Recovered	RecoveryRecovered	-2.09877e-07	7.6291e-07	1.90417e-07	0.905177	0.999827	0.905177	0.999827		abundance	150	150	pathways
PWY-7315	Sex	Female	SexFemale	-4.51513e-06	-5.59283e-07	5.42631e-06	0.905409	0.999827	0.905409	0.999827		abundance	150	150	pathways
PWY-7013	Sex	Female	SexFemale	3.43852e-06	-5.59283e-07	7.90968e-06	0.905805	0.999827	0.905805	0.999827		abundance	150	150	pathways
PWY-5464	Sex	Female	SexFemale	3.33536e-06	-5.59283e-07	3.81075e-06	0.906234	0.999827	0.906234	0.999827		abundance	150	150	pathways
PWY-5367	Sex	Female	SexFemale	-4.44557e-06	-5.59283e-07	5.01583e-06	0.906884	0.999827	0.906884	0.999827		abundance	150	150	pathways
PWY-6595	Sex	Female	SexFemale	-4.44707e-06	-5.59283e-07	5.81166e-06	0.907209	0.999827	0.907209	0.999827		abundance	150	150	pathways
PWY-5180	Sex	Female	SexFemale	-4.45157e-06	-5.59283e-07	6.86773e-06	0.907654	0.999827	0.907654	0.999827		abundance	150	150	pathways
PWY-7317	Recovery	Recovered	RecoveryRecovered	-1.80893e-07	7.6291e-07	1.13312e-07	0.907973	0.999827	0.907973	0.999827		abundance	150	150	pathways
PWY-702	Sex	Female	SexFemale	-5.20651e-06	-5.59283e-07	2.35344e-05	0.908479	0.999827	0.908479	0.999827		abundance	150	150	pathways
PWY-6708	Recovery	Recovered	RecoveryRecovered	1.69948e-06	7.6291e-07	1.08734e-06	0.909462	0.999827	0.909462	0.999827		abundance	150	150	pathways
PWY0-1296	Sex	Female	SexFemale	3.8824e-06	-5.59283e-07	2.1162e-05	0.909522	0.999827	0.909522	0.999827		abundance	150	150	pathways
PWY-5981	Sex	Female	SexFemale	3.27524e-06	-5.59283e-07	7.92922e-06	0.909646	0.999827	0.909646	0.999827		abundance	150	150	pathways
PWY-6168	Sex	Female	SexFemale	-4.44165e-06	-5.59283e-07	9.66869e-06	0.909723	0.999827	0.909723	0.999827		abundance	150	150	pathways
PPGPPMET-PWY	Sex	Female	SexFemale	3.20814e-06	-5.59283e-07	5.15566e-06	0.909777	0.999827	0.909777	0.999827		abundance	150	150	pathways
PWY-7400	Sex	Female	SexFemale	-4.68936e-06	-5.59283e-07	1.61097e-05	0.910133	0.999827	0.910133	0.999827		abundance	150	150	pathways
PWY-6292	Sex	Female	SexFemale	-4.27125e-06	-5.59283e-07	4.03006e-06	0.910683	0.999827	0.910683	0.999827		abundance	150	150	pathways
PWY-7209	Recovery	Recovered	RecoveryRecovered	-2.33657e-07	7.6291e-07	3.84688e-06	0.912101	0.999827	0.912101	0.999827		abundance	150	150	pathways
PWY-6922	Recovery	Recovered	RecoveryRecovered	1.68188e-06	7.6291e-07	1.7646e-06	0.912387	0.999827	0.912387	0.999827		abundance	150	150	pathways
PWY-7039	Recovery	Recovered	RecoveryRecovered	-1.41726e-07	7.6291e-07	1.13221e-06	0.912597	0.999827	0.912597	0.999827		abundance	150	150	pathways
PWY-7805	Recovery	Recovered	RecoveryRecovered	1.66565e-06	7.6291e-07	1.39511e-06	0.913206	0.999827	0.913206	0.999827		abundance	150	150	pathways
PWY-724	Recovery	Recovered	RecoveryRecovered	-1.21218e-06	7.6291e-07	1.62123e-05	0.913446	0.999827	0.913446	0.999827		abundance	150	150	pathways
PWY-5897	Recovery	Recovered	RecoveryRecovered	2.05297e-06	7.6291e-07	8.6092e-06	0.913454	0.999827	0.913454	0.999827		abundance	150	150	pathways
PWY-5898	Recovery	Recovered	RecoveryRecovered	2.05297e-06	7.6291e-07	8.6092e-06	0.91346	0.999827	0.91346	0.999827		abundance	150	150	pathways
PWY-5899	Recovery	Recovered	RecoveryRecovered	2.05297e-06	7.6291e-07	8.6092e-06	0.913464	0.999827	0.913464	0.999827		abundance	150	150	pathways
PWY-7210	Recovery	Recovered	RecoveryRecovered	-2.81105e-07	7.6291e-07	5.28957e-06	0.914587	0.999827	0.914587	0.999827		abundance	150	150	pathways
FUC-RHAMCAT-PWY	Recovery	Recovered	RecoveryRecovered	-4.60901e-07	7.6291e-07	8.01196e-06	0.914863	0.999827	0.914863	0.999827		abundance	150	150	pathways
PWY0-1061	Sex	Female	SexFemale	-4.36554e-06	-5.59283e-07	1.41578e-05	0.915262	0.999827	0.915262	0.999827		abundance	150	150	pathways
POLYISOPRENSYN-PWY	Sex	Female	SexFemale	-4.17448e-06	-5.59283e-07	8.89456e-06	0.915393	0.999827	0.915393	0.999827		abundance	150	150	pathways
PWY-5838	Recovery	Recovered	RecoveryRecovered	-5.33233e-07	7.6291e-07	9.16738e-06	0.916	0.999827	0.916	0.999827		abundance	150	150	pathways
P42-PWY	Sex	Female	SexFemale	2.93441e-06	-5.59283e-07	4.71175e-06	0.916141	0.999827	0.916141	0.999827		abundance	150	150	pathways
PWY-6353	Sex	Female	SexFemale	-4.23107e-06	-5.59283e-07	1.28552e-05	0.917099	0.999827	0.917099	0.999827		abundance	150	150	pathways
PWY0-1338	Sex	Female	SexFemale	-3.98945e-06	-5.59283e-07	3.78914e-06	0.917367	0.999827	0.917367	0.999827		abundance	150	150	pathways
CARNMET-PWY	Recovery	Recovered	RecoveryRecovered	-8.76884e-08	7.6291e-07	9.2341e-07	0.917538	0.999827	0.917538	0.999827		abundance	150	150	pathways
P108-PWY	Sex	Female	SexFemale	2.84214e-06	-5.59283e-07	2.7598e-06	0.917803	0.999827	0.917803	0.999827		abundance	150	150	pathways
PWY-2942	Sex	Female	SexFemale	3.34812e-06	-5.59283e-07	1.89586e-05	0.917963	0.999827	0.917963	0.999827		abundance	150	150	pathways
GLYCOCAT-PWY	Recovery	Recovered	RecoveryRecovered	2.3969e-06	7.6291e-07	1.36299e-05	0.918163	0.999827	0.918163	0.999827		abundance	150	150	pathways
ARGSYN-PWY	Recovery	Recovered	RecoveryRecovered	-1.26796e-06	7.6291e-07	1.81582e-05	0.918845	0.999827	0.918845	0.999827		abundance	150	150	pathways
PWY-5862	Recovery	Recovered	RecoveryRecovered	1.90357e-06	7.6291e-07	7.70412e-06	0.919091	0.999827	0.919091	0.999827		abundance	150	150	pathways
ANAEROFRUCAT-PWY	Sex	Female	SexFemale	-4.04034e-06	-5.59283e-07	1.004e-05	0.919274	0.999827	0.919274	0.999827		abundance	150	150	pathways
PWY-6121	Sex	Female	SexFemale	3.15153e-06	-5.59283e-07	1.66185e-05	0.919722	0.999827	0.919722	0.999827		abundance	150	150	pathways
GOLPDLCAT-PWY	Recovery	Recovered	RecoveryRecovered	1.65235e-06	7.6291e-07	3.4027e-06	0.919906	0.999827	0.919906	0.999827		abundance	150	150	pathways
PWY-7723	Recovery	Recovered	RecoveryRecovered	1.58914e-06	7.6291e-07	1.08706e-06	0.920091	0.999827	0.920091	0.999827		abundance	150	150	pathways
PWY-6572	Recovery	Recovered	RecoveryRecovered	-5.79131e-08	7.6291e-07	7.63179e-07	0.920257	0.999827	0.920257	0.999827		abundance	150	150	pathways
PWY-702	Recovery	Recovered	RecoveryRecovered	3.26654e-06	7.6291e-07	2.36357e-05	0.920355	0.999827	0.920355	0.999827		abundance	150	150	pathways
PWY-7388	Sex	Female	SexFemale	2.77299e-06	-5.59283e-07	6.14793e-06	0.920563	0.999827	0.920563	0.999827		abundance	150	150	pathways
PWY-7942	Recovery	Recovered	RecoveryRecovered	-2.1699e-07	7.6291e-07	5.56493e-06	0.921036	0.999827	0.921036	0.999827		abundance	150	150	pathways
ORNDEG-PWY	Recovery	Recovered	RecoveryRecovered	2.17308e-06	7.6291e-07	1.16402e-05	0.921064	0.999827	0.921064	0.999827		abundance	150	150	pathways
PWY66-398	Recovery	Recovered	RecoveryRecovered	-4.07948e-08	7.6291e-07	4.2074e-08	0.921579	0.999827	0.921579	0.999827		abundance	150	150	pathways
PWY-7389	Recovery	Recovered	RecoveryRecovered	-4.18969e-08	7.6291e-07	6.45449e-07	0.921713	0.999827	0.921713	0.999827		abundance	150	150	pathways
PWY-5654	Recovery	Recovered	RecoveryRecovered	-3.80199e-08	7.6291e-07	3.74534e-07	0.921928	0.999827	0.921928	0.999827		abundance	150	150	pathways
PWY-6210	Recovery	Recovered	RecoveryRecovered	-3.70765e-08	7.6291e-07	3.74532e-07	0.922021	0.999827	0.922021	0.999827		abundance	150	150	pathways
PWY-7254	Sex	Female	SexFemale	2.67856e-06	-5.59283e-07	4.36729e-06	0.922151	0.999827	0.922151	0.999827		abundance	150	150	pathways
PWY-7237	Sex	Female	SexFemale	-4.18708e-06	-5.59283e-07	1.73721e-05	0.922241	0.999827	0.922241	0.999827		abundance	150	150	pathways
PWY-6143	Recovery	Recovered	RecoveryRecovered	-3.65287e-08	7.6291e-07	8.15612e-07	0.922379	0.999827	0.922379	0.999827		abundance	150	150	pathways
PWY-6588	Sex	Female	SexFemale	2.64001e-06	-5.59283e-07	2.41262e-06	0.922608	0.999827	0.922608	0.999827		abundance	150	150	pathways
HEXITOLDEGSUPER-PWY	Recovery	Recovered	RecoveryRecovered	2.01616e-06	7.6291e-07	1.00321e-05	0.922856	0.999827	0.922856	0.999827		abundance	150	150	pathways
PWY-6383	Recovery	Recovered	RecoveryRecovered	-2.67408e-08	7.6291e-07	3.24842e-08	0.922946	0.999827	0.922946	0.999827		abundance	150	150	pathways
PWY-5430	Recovery	Recovered	RecoveryRecovered	-2.66974e-08	7.6291e-07	3.44272e-08	0.92295	0.999827	0.92295	0.999827		abundance	150	150	pathways
PWY0-845	Sex	Female	SexFemale	-3.87038e-06	-5.59283e-07	9.9015e-06	0.923111	0.999827	0.923111	0.999827		abundance	150	150	pathways
PWY-7159	Recovery	Recovered	RecoveryRecovered	-2.0924e-08	7.6291e-07	4.66085e-08	0.923512	0.999827	0.923512	0.999827		abundance	150	150	pathways
PWY-5531	Recovery	Recovered	RecoveryRecovered	-2.05228e-08	7.6291e-07	4.63888e-08	0.923551	0.999827	0.923551	0.999827		abundance	150	150	pathways
PWY-5695	Recovery	Recovered	RecoveryRecovered	-7.2508e-07	7.6291e-07	1.3172e-05	0.923595	0.999827	0.923595	0.999827		abundance	150	150	pathways
PWY-5873	Recovery	Recovered	RecoveryRecovered	-1.96844e-08	7.6291e-07	3.71451e-08	0.923632	0.999827	0.923632	0.999827		abundance	150	150	pathways
PWY-6282	Recovery	Recovered	RecoveryRecovered	2.22233e-06	7.6291e-07	1.28809e-05	0.92384	0.999827	0.92384	0.999827		abundance	150	150	pathways
CHLOROPHYLL-SYN	Recovery	Recovered	RecoveryRecovered	-1.70863e-08	7.6291e-07	2.0756e-08	0.923885	0.999827	0.923885	0.999827		abundance	150	150	pathways
PWY-6604	Recovery	Recovered	RecoveryRecovered	-1.58056e-08	7.6291e-07	1.63012e-08	0.924009	0.999827	0.924009	0.999827		abundance	150	150	pathways
PWY-7204	Recovery	Recovered	RecoveryRecovered	1.65792e-06	7.6291e-07	4.6397e-06	0.924069	0.999827	0.924069	0.999827		abundance	150	150	pathways
PWY-7800	Recovery	Recovered	RecoveryRecovered	-1.35169e-08	7.6291e-07	1.39407e-08	0.924232	0.999827	0.924232	0.999827		abundance	150	150	pathways
PWY-6594	Recovery	Recovered	RecoveryRecovered	-1.15986e-08	7.6291e-07	1.19623e-08	0.924418	0.999827	0.924418	0.999827		abundance	150	150	pathways
PWY-8188	Recovery	Recovered	RecoveryRecovered	-1.15665e-08	7.6291e-07	3.26235e-08	0.924422	0.999827	0.924422	0.999827		abundance	150	150	pathways
PWY-8189	Recovery	Recovered	RecoveryRecovered	-1.15665e-08	7.6291e-07	3.26235e-08	0.924422	0.999827	0.924422	0.999827		abundance	150	150	pathways
PROPFERM-PWY	Recovery	Recovered	RecoveryRecovered	-1.15665e-08	7.6291e-07	3.26235e-08	0.924422	0.999827	0.924422	0.999827		abundance	150	150	pathways
P101-PWY	Recovery	Recovered	RecoveryRecovered	-1.13132e-08	7.6291e-07	1.37431e-08	0.924446	0.999827	0.924446	0.999827		abundance	150	150	pathways
NADSYN-PWY	Recovery	Recovered	RecoveryRecovered	-1.07728e-08	7.6291e-07	1.30866e-08	0.924499	0.999827	0.924499	0.999827		abundance	150	150	pathways
PWY-7374	Recovery	Recovered	RecoveryRecovered	-1.04398e-08	7.6291e-07	1.26821e-08	0.924531	0.999827	0.924531	0.999827		abundance	150	150	pathways
GLUDEG-II-PWY	Recovery	Recovered	RecoveryRecovered	-1.04188e-08	7.6291e-07	1.07454e-08	0.924533	0.999827	0.924533	0.999827		abundance	150	150	pathways
PWY-3841	Recovery	Recovered	RecoveryRecovered	-8.6717e-07	7.6291e-07	1.51342e-05	0.924578	0.999827	0.924578	0.999827		abundance	150	150	pathways
PWY-8055	Recovery	Recovered	RecoveryRecovered	-9.25352e-09	7.6291e-07	9.54368e-09	0.924646	0.999827	0.924646	0.999827		abundance	150	150	pathways
PWY-5079	Recovery	Recovered	RecoveryRecovered	-8.77026e-09	7.6291e-07	9.04526e-09	0.924693	0.999827	0.924693	0.999827		abundance	150	150	pathways
PWY-6583	Recovery	Recovered	RecoveryRecovered	-7.45138e-09	7.6291e-07	7.68503e-09	0.924822	0.999827	0.924822	0.999827		abundance	150	150	pathways
PWY-5129	Recovery	Recovered	RecoveryRecovered	-6.95958e-09	7.6291e-07	7.17781e-09	0.92487	0.999827	0.92487	0.999827		abundance	150	150	pathways
PWY-6662	Recovery	Recovered	RecoveryRecovered	-6.84882e-09	7.6291e-07	8.3198e-09	0.92488	0.999827	0.92488	0.999827		abundance	150	150	pathways
PWY-5651	Recovery	Recovered	RecoveryRecovered	-6.73646e-09	7.6291e-07	8.18331e-09	0.924891	0.999827	0.924891	0.999827		abundance	150	150	pathways
PWY-5494	Recovery	Recovered	RecoveryRecovered	-5.28095e-09	7.6291e-07	1.46925e-08	0.925033	0.999827	0.925033	0.999827		abundance	150	150	pathways
PWY-5742	Recovery	Recovered	RecoveryRecovered	-4.79428e-09	7.6291e-07	5.824e-09	0.92508	0.999827	0.92508	0.999827		abundance	150	150	pathways
PWY-7340	Recovery	Recovered	RecoveryRecovered	-8.88902e-09	7.6291e-07	8.49236e-07	0.925086	0.999827	0.925086	0.999827		abundance	150	150	pathways
PWY-7420	Recovery	Recovered	RecoveryRecovered	-3.8342e-09	7.6291e-07	3.95443e-09	0.925174	0.999827	0.925174	0.999827		abundance	150	150	pathways
PWY-7511	Recovery	Recovered	RecoveryRecovered	-2.33401e-09	7.6291e-07	2.4072e-09	0.92532	0.999827	0.92532	0.999827		abundance	150	150	pathways
PWY-822	Sex	Female	SexFemale	2.5214e-06	-5.59283e-07	1.54123e-06	0.92535	0.999827	0.92535	0.999827		abundance	150	150	pathways
PWY-7560	Sex	Female	SexFemale	-3.79452e-06	-5.59283e-07	1.07937e-05	0.925451	0.999827	0.925451	0.999827		abundance	150	150	pathways
PWY-5647	Recovery	Recovered	RecoveryRecovered	-6.34848e-10	7.6291e-07	7.712e-10	0.925485	0.999827	0.925485	0.999827		abundance	150	150	pathways
PWY-7905	Recovery	Recovered	RecoveryRecovered	1.06322e-10	7.6291e-07	4.39642e-09	0.925557	0.999827	0.925557	0.999827		abundance	150	150	pathways
PWY-6588	Recovery	Recovered	RecoveryRecovered	1.55844e-06	7.6291e-07	2.42301e-06	0.925569	0.999827	0.925569	0.999827		abundance	150	150	pathways
PWY-7399	Recovery	Recovered	RecoveryRecovered	1.88049e-09	7.6291e-07	4.93139e-08	0.925731	0.999827	0.925731	0.999827		abundance	150	150	pathways
COLANSYN-PWY	Recovery	Recovered	RecoveryRecovered	-2.88354e-07	7.6291e-07	7.78788e-06	0.925833	0.999827	0.925833	0.999827		abundance	150	150	pathways
PHOTOALL-PWY	Recovery	Recovered	RecoveryRecovered	4.2379e-09	7.6291e-07	2.98016e-09	0.925959	0.999827	0.925959	0.999827		abundance	150	150	pathways
PWY-6467	Recovery	Recovered	RecoveryRecovered	4.27747e-09	7.6291e-07	5.53037e-07	0.926133	0.999827	0.926133	0.999827		abundance	150	150	pathways
PWY-6837	Recovery	Recovered	RecoveryRecovered	6.9949e-09	7.6291e-07	6.68285e-09	0.926227	0.999827	0.926227	0.999827		abundance	150	150	pathways
PWY-7218	Recovery	Recovered	RecoveryRecovered	8.32729e-09	7.6291e-07	5.84197e-09	0.926357	0.999827	0.926357	0.999827		abundance	150	150	pathways
PWY-7124	Recovery	Recovered	RecoveryRecovered	8.39612e-09	7.6291e-07	5.90177e-09	0.926364	0.999827	0.926364	0.999827		abundance	150	150	pathways
PWY-6421	Recovery	Recovered	RecoveryRecovered	8.92619e-09	7.6291e-07	8.52799e-09	0.926415	0.999827	0.926415	0.999827		abundance	150	150	pathways
PWY-7337	Recovery	Recovered	RecoveryRecovered	9.14518e-09	7.6291e-07	8.73721e-09	0.926437	0.999827	0.926437	0.999827		abundance	150	150	pathways
PWY-7338	Recovery	Recovered	RecoveryRecovered	9.14518e-09	7.6291e-07	8.73721e-09	0.926437	0.999827	0.926437	0.999827		abundance	150	150	pathways
PWY-7090	Recovery	Recovered	RecoveryRecovered	1.27893e-08	7.6291e-07	1.07002e-08	0.926791	0.999827	0.926791	0.999827		abundance	150	150	pathways
COBALSYN-PWY	Sex	Female	SexFemale	2.4979e-06	-5.59283e-07	6.30155e-06	0.927164	0.999827	0.927164	0.999827		abundance	150	150	pathways
PWY-6807	Sex	Female	SexFemale	2.44196e-06	-5.59283e-07	1.93176e-06	0.927315	0.999827	0.927315	0.999827		abundance	150	150	pathways
HSERMETANA-PWY	Sex	Female	SexFemale	2.65002e-06	-5.59283e-07	1.28159e-05	0.927478	0.999827	0.927478	0.999827		abundance	150	150	pathways
LEU-DEG2-PWY	Recovery	Recovered	RecoveryRecovered	2.10709e-08	7.6291e-07	1.7629e-08	0.927597	0.999827	0.927597	0.999827		abundance	150	150	pathways
12DICHLORETHDEG-PWY	Recovery	Recovered	RecoveryRecovered	2.19998e-08	7.6291e-07	3.2643e-08	0.927688	0.999827	0.927688	0.999827		abundance	150	150	pathways
PWY-7094	Sex	Female	SexFemale	-3.5533e-06	-5.59283e-07	3.50095e-06	0.927773	0.999827	0.927773	0.999827		abundance	150	150	pathways
PWY-1361	Recovery	Recovered	RecoveryRecovered	2.35391e-08	7.6291e-07	1.96941e-08	0.927838	0.999827	0.927838	0.999827		abundance	150	150	pathways
ALL-CHORISMATE-PWY	Recovery	Recovered	RecoveryRecovered	1.51925e-06	7.6291e-07	1.77251e-06	0.92786	0.999827	0.92786	0.999827		abundance	150	150	pathways
14DICHLORBENZDEG-PWY	Recovery	Recovered	RecoveryRecovered	2.68685e-08	7.6291e-07	2.24796e-08	0.928162	0.999827	0.928162	0.999827		abundance	150	150	pathways
PWY-6084	Recovery	Recovered	RecoveryRecovered	2.68685e-08	7.6291e-07	2.24796e-08	0.928162	0.999827	0.928162	0.999827		abundance	150	150	pathways
P163-PWY	Recovery	Recovered	RecoveryRecovered	2.73468e-08	7.6291e-07	1.61296e-08	0.928208	0.999827	0.928208	0.999827		abundance	150	150	pathways
PWY-7376	Recovery	Recovered	RecoveryRecovered	2.82987e-08	7.6291e-07	2.70362e-08	0.928301	0.999827	0.928301	0.999827		abundance	150	150	pathways
PWY-7237	Recovery	Recovered	RecoveryRecovered	2.49325e-06	7.6291e-07	1.74469e-05	0.928499	0.999827	0.928499	0.999827		abundance	150	150	pathways
COMPLETE-ARO-PWY	Recovery	Recovered	RecoveryRecovered	-8.35899e-07	7.6291e-07	1.59775e-05	0.929089	0.999827	0.929089	0.999827		abundance	150	150	pathways
PWY-5659	Sex	Female	SexFemale	2.45173e-06	-5.59283e-07	9.04507e-06	0.929574	0.999827	0.929574	0.999827		abundance	150	150	pathways
PWY-7409	Sex	Female	SexFemale	-3.46437e-06	-5.59283e-07	2.16122e-06	0.929669	0.999827	0.929669	0.999827		abundance	150	150	pathways
PWY-6518	Recovery	Recovered	RecoveryRecovered	4.40888e-08	7.6291e-07	5.13701e-08	0.929839	0.999827	0.929839	0.999827		abundance	150	150	pathways
PWY-6748	Recovery	Recovered	RecoveryRecovered	4.55045e-08	7.6291e-07	7.77252e-08	0.929979	0.999827	0.929979	0.999827		abundance	150	150	pathways
P124-PWY	Sex	Female	SexFemale	-3.70172e-06	-5.59283e-07	1.42923e-05	0.930104	0.999827	0.930104	0.999827		abundance	150	150	pathways
PWY-7388	Recovery	Recovered	RecoveryRecovered	1.65497e-06	7.6291e-07	6.17441e-06	0.930562	0.999827	0.930562	0.999827		abundance	150	150	pathways
PWY-101	Recovery	Recovered	RecoveryRecovered	5.20171e-08	7.6291e-07	3.09071e-08	0.93061	0.999827	0.93061	0.999827		abundance	150	150	pathways
PWY-6981	Recovery	Recovered	RecoveryRecovered	5.23947e-08	7.6291e-07	1.39283e-07	0.930657	0.999827	0.930657	0.999827		abundance	150	150	pathways
PWY-7456	Sex	Female	SexFemale	2.32236e-06	-5.59283e-07	5.3747e-06	0.931	0.999827	0.931	0.999827		abundance	150	150	pathways
PWY-5896	Recovery	Recovered	RecoveryRecovered	1.78948e-06	7.6291e-07	8.73816e-06	0.931626	0.999827	0.931626	0.999827		abundance	150	150	pathways
PWY-1501	Recovery	Recovered	RecoveryRecovered	6.27054e-08	7.6291e-07	4.78342e-08	0.931652	0.999827	0.931652	0.999827		abundance	150	150	pathways
PWY-7268	Sex	Female	SexFemale	2.23907e-06	-5.59283e-07	1.64352e-06	0.932184	0.999827	0.932184	0.999827		abundance	150	150	pathways
PWY4LZ-257	Sex	Female	SexFemale	-3.44058e-06	-5.59283e-07	9.44168e-06	0.932812	0.999827	0.932812	0.999827		abundance	150	150	pathways
PWY-6270	Sex	Female	SexFemale	-3.4324e-06	-5.59283e-07	9.10642e-06	0.932822	0.999827	0.932822	0.999827		abundance	150	150	pathways
METH-ACETATE-PWY	Sex	Female	SexFemale	2.20283e-06	-5.59283e-07	9.08402e-07	0.933003	0.999827	0.933003	0.999827		abundance	150	150	pathways
PWY-7731	Recovery	Recovered	RecoveryRecovered	7.74313e-08	7.6291e-07	4.5933e-08	0.933086	0.999827	0.933086	0.999827		abundance	150	150	pathways
PWY-6957	Recovery	Recovered	RecoveryRecovered	7.79043e-08	7.6291e-07	1.10232e-07	0.933136	0.999827	0.933136	0.999827		abundance	150	150	pathways
PWY-5971	Recovery	Recovered	RecoveryRecovered	2.05514e-06	7.6291e-07	1.30908e-05	0.933307	0.999827	0.933307	0.999827		abundance	150	150	pathways
THRESYN-PWY	Sex	Female	SexFemale	2.57023e-06	-5.59283e-07	1.78857e-05	0.933329	0.999827	0.933329	0.999827		abundance	150	150	pathways
PWY-5497	Sex	Female	SexFemale	-3.32138e-06	-5.59283e-07	4.06049e-06	0.933483	0.999827	0.933483	0.999827		abundance	150	150	pathways
PWY66-388	Recovery	Recovered	RecoveryRecovered	8.31848e-08	7.6291e-07	2.25084e-07	0.933669	0.999827	0.933669	0.999827		abundance	150	150	pathways
PWY-1541	Recovery	Recovered	RecoveryRecovered	8.47513e-08	7.6291e-07	7.09073e-08	0.9338	0.999827	0.9338	0.999827		abundance	150	150	pathways
FASYN-INITIAL-PWY	Sex	Female	SexFemale	-3.31442e-06	-5.59283e-07	4.95715e-06	0.933894	0.999827	0.933894	0.999827		abundance	150	150	pathways
PWY-6565	Recovery	Recovered	RecoveryRecovered	8.33274e-08	7.6291e-07	9.24316e-07	0.934076	0.999827	0.934076	0.999827		abundance	150	150	pathways
PWY-7383	Sex	Female	SexFemale	-3.27732e-06	-5.59283e-07	2.97218e-06	0.934312	0.999827	0.934312	0.999827		abundance	150	150	pathways
BIOTIN-BIOSYNTHESIS-PWY	Sex	Female	SexFemale	-3.41273e-06	-5.59283e-07	1.09515e-05	0.93432	0.999827	0.93432	0.999827		abundance	150	150	pathways
P125-PWY	Sex	Female	SexFemale	2.14474e-06	-5.59283e-07	3.87215e-06	0.934834	0.999827	0.934834	0.999827		abundance	150	150	pathways
PWY-7820	Recovery	Recovered	RecoveryRecovered	9.54024e-08	7.6291e-07	2.95033e-07	0.934876	0.999827	0.934876	0.999827		abundance	150	150	pathways
PWY-6396	Sex	Female	SexFemale	2.13412e-06	-5.59283e-07	3.64622e-06	0.935038	0.999827	0.935038	0.999827		abundance	150	150	pathways
PWY-5104	Sex	Female	SexFemale	-3.25071e-06	-5.59283e-07	3.87879e-06	0.935138	0.999827	0.935138	0.999827		abundance	150	150	pathways
PWY66-409	Sex	Female	SexFemale	2.29014e-06	-5.59283e-07	1.22769e-05	0.935239	0.999827	0.935239	0.999827		abundance	150	150	pathways
PWY-5845	Recovery	Recovered	RecoveryRecovered	1.71442e-06	7.6291e-07	8.48773e-06	0.935635	0.999827	0.935635	0.999827		abundance	150	150	pathways
CITRULBIO-PWY	Recovery	Recovered	RecoveryRecovered	-3.79808e-07	7.6291e-07	1.15405e-05	0.935651	0.999827	0.935651	0.999827		abundance	150	150	pathways
PWY-7200	Recovery	Recovered	RecoveryRecovered	8.80457e-08	7.6291e-07	2.11919e-06	0.936234	0.999827	0.936234	0.999827		abundance	150	150	pathways
PWY-6527	Sex	Female	SexFemale	-3.38262e-06	-5.59283e-07	1.3408e-05	0.936575	0.999827	0.936575	0.999827		abundance	150	150	pathways
PWY-7790	Recovery	Recovered	RecoveryRecovered	-9.9878e-07	7.6291e-07	2.0749e-05	0.937112	0.999827	0.937112	0.999827		abundance	150	150	pathways
PWY-7791	Recovery	Recovered	RecoveryRecovered	-9.9878e-07	7.6291e-07	2.0749e-05	0.937118	0.999827	0.937118	0.999827		abundance	150	150	pathways
UDPNAGSYN-PWY	Recovery	Recovered	RecoveryRecovered	-9.91229e-07	7.6291e-07	2.08343e-05	0.937604	0.999827	0.937604	0.999827		abundance	150	150	pathways
P164-PWY	Sex	Female	SexFemale	2.01529e-06	-5.59283e-07	3.51337e-06	0.937872	0.999827	0.937872	0.999827		abundance	150	150	pathways
PWY-6293	Recovery	Recovered	RecoveryRecovered	1.44028e-06	7.6291e-07	3.07366e-06	0.938108	0.999827	0.938108	0.999827		abundance	150	150	pathways
PWY-2201	Recovery	Recovered	RecoveryRecovered	1.40266e-06	7.6291e-07	1.16788e-06	0.938164	0.999827	0.938164	0.999827		abundance	150	150	pathways
PWY-821	Recovery	Recovered	RecoveryRecovered	-8.31065e-08	7.6291e-07	7.40804e-06	0.938879	0.999827	0.938879	0.999827		abundance	150	150	pathways
PWY-6519	Sex	Female	SexFemale	-3.2053e-06	-5.59283e-07	1.15806e-05	0.939443	0.999827	0.939443	0.999827		abundance	150	150	pathways
PYRIDNUCSAL-PWY	Recovery	Recovered	RecoveryRecovered	-6.61786e-08	7.6291e-07	7.23764e-06	0.939475	0.999827	0.939475	0.999827		abundance	150	150	pathways
GOLPDLCAT-PWY	Sex	Female	SexFemale	1.94313e-06	-5.59283e-07	3.38811e-06	0.939585	0.999827	0.939585	0.999827		abundance	150	150	pathways
PWY0-162	Sex	Female	SexFemale	-3.16997e-06	-5.59283e-07	1.04434e-05	0.939623	0.999827	0.939623	0.999827		abundance	150	150	pathways
ECASYN-PWY	Sex	Female	SexFemale	-3.04659e-06	-5.59283e-07	2.86447e-06	0.93986	0.999827	0.93986	0.999827		abundance	150	150	pathways
PWY0-1337	Sex	Female	SexFemale	-3.05056e-06	-5.59283e-07	3.62466e-06	0.939899	0.999827	0.939899	0.999827		abundance	150	150	pathways
PWY-5178	Recovery	Recovered	RecoveryRecovered	1.47954e-07	7.6291e-07	4.0962e-07	0.940028	0.999827	0.940028	0.999827		abundance	150	150	pathways
PWY-6293	Sex	Female	SexFemale	-3.03576e-06	-5.59283e-07	3.06048e-06	0.940152	0.999827	0.940152	0.999827		abundance	150	150	pathways
PWY-2201	Sex	Female	SexFemale	1.90534e-06	-5.59283e-07	1.16287e-06	0.940218	0.999827	0.940218	0.999827		abundance	150	150	pathways
PWY-7953	Recovery	Recovered	RecoveryRecovered	-6.25596e-07	7.6291e-07	1.65904e-05	0.940219	0.999827	0.940219	0.999827		abundance	150	150	pathways
METHGLYUT-PWY	Sex	Female	SexFemale	-3.00731e-06	-5.59283e-07	2.17826e-06	0.940713	0.999827	0.940713	0.999827		abundance	150	150	pathways
P221-PWY	Recovery	Recovered	RecoveryRecovered	1.31298e-07	7.6291e-07	2.37531e-06	0.940788	0.999827	0.940788	0.999827		abundance	150	150	pathways
PWY-6318	Recovery	Recovered	RecoveryRecovered	1.56832e-07	7.6291e-07	5.04797e-07	0.940931	0.999827	0.940931	0.999827		abundance	150	150	pathways
PWY0-1221	Sex	Female	SexFemale	-2.99341e-06	-5.59283e-07	1.71358e-06	0.941	0.999827	0.941	0.999827		abundance	150	150	pathways
PWY-7873	Recovery	Recovered	RecoveryRecovered	1.57297e-07	7.6291e-07	9.07706e-07	0.941225	0.999827	0.941225	0.999827		abundance	150	150	pathways
PWY66-399	Sex	Female	SexFemale	-2.99017e-06	-5.59283e-07	3.74164e-06	0.941377	0.999827	0.941377	0.999827		abundance	150	150	pathways
PRPP-PWY	Sex	Female	SexFemale	-2.9914e-06	-5.59283e-07	7.8578e-06	0.942588	0.999827	0.942588	0.999827		abundance	150	150	pathways
AEROBACTINSYN-PWY	Sex	Female	SexFemale	-2.90711e-06	-5.59283e-07	2.1515e-06	0.943132	0.999827	0.943132	0.999827		abundance	150	150	pathways
PHOSLIPSYN-PWY	Sex	Female	SexFemale	-3.01034e-06	-5.59283e-07	1.03845e-05	0.943277	0.999827	0.943277	0.999827		abundance	150	150	pathways
PWY-5677	Recovery	Recovered	RecoveryRecovered	1.83573e-07	7.6291e-07	4.61631e-07	0.943515	0.999827	0.943515	0.999827		abundance	150	150	pathways
GLYCOGENSYNTH-PWY	Recovery	Recovered	RecoveryRecovered	2.05818e-06	7.6291e-07	1.64172e-05	0.943737	0.999827	0.943737	0.999827		abundance	150	150	pathways
PWY-7242	Recovery	Recovered	RecoveryRecovered	1.07287e-07	7.6291e-07	4.45758e-06	0.943828	0.999827	0.943828	0.999827		abundance	150	150	pathways
KDO-NAGLIPASYN-PWY	Sex	Female	SexFemale	-2.87408e-06	-5.59283e-07	2.07894e-06	0.943923	0.999827	0.943923	0.999827		abundance	150	150	pathways
GLUTORN-PWY	Recovery	Recovered	RecoveryRecovered	2.01114e-06	7.6291e-07	1.58248e-05	0.944175	0.999827	0.944175	0.999827		abundance	150	150	pathways
BRANCHED-CHAIN-AA-SYN-PWY	Sex	Female	SexFemale	2.01891e-06	-5.59283e-07	1.66598e-05	0.944201	0.999827	0.944201	0.999827		abundance	150	150	pathways
DARABCATK12-PWY	Sex	Female	SexFemale	-2.85583e-06	-5.59283e-07	1.55997e-06	0.944316	0.999827	0.944316	0.999827		abundance	150	150	pathways
GLYCOL-GLYOXDEG-PWY	Sex	Female	SexFemale	-2.85277e-06	-5.59283e-07	1.67881e-06	0.9444	0.999827	0.9444	0.999827		abundance	150	150	pathways
POLYAMINSYN3-PWY	Recovery	Recovered	RecoveryRecovered	1.92364e-07	7.6291e-07	1.28875e-06	0.944961	0.999827	0.944961	0.999827		abundance	150	150	pathways
PWY-5747	Recovery	Recovered	RecoveryRecovered	1.83883e-07	7.6291e-07	2.49144e-06	0.945913	0.999827	0.945913	0.999827		abundance	150	150	pathways
PWY-7805	Sex	Female	SexFemale	-2.78769e-06	-5.59283e-07	1.38913e-06	0.945953	0.999827	0.945953	0.999827		abundance	150	150	pathways
PWY-7434	Recovery	Recovered	RecoveryRecovered	2.13131e-07	7.6291e-07	2.18739e-07	0.946327	0.999827	0.946327	0.999827		abundance	150	150	pathways
PROTOCATECHUATE-ORTHO-CLEAVAGE-PWY	Sex	Female	SexFemale	1.63934e-06	-5.59283e-07	1.88442e-06	0.946714	0.999827	0.946714	0.999827		abundance	150	150	pathways
PWY0-881	Recovery	Recovered	RecoveryRecovered	2.17433e-07	7.6291e-07	1.54775e-07	0.946737	0.999827	0.946737	0.999827		abundance	150	150	pathways
PWY-5097	Sex	Female	SexFemale	-3.04588e-06	-5.59283e-07	1.77039e-05	0.94688	0.999827	0.94688	0.999827		abundance	150	150	pathways
PWY-7009	Recovery	Recovered	RecoveryRecovered	2.20595e-07	7.6291e-07	1.35893e-07	0.947043	0.999827	0.947043	0.999827		abundance	150	150	pathways
TYRFUMCAT-PWY	Recovery	Recovered	RecoveryRecovered	2.23381e-07	7.6291e-07	1.675e-07	0.947319	0.999827	0.947319	0.999827		abundance	150	150	pathways
PWY-6595	Recovery	Recovered	RecoveryRecovered	1.0098e-07	7.6291e-07	5.83669e-06	0.947447	0.999827	0.947447	0.999827		abundance	150	150	pathways
PWY-7807	Sex	Female	SexFemale	-2.72393e-06	-5.59283e-07	1.35619e-06	0.947495	0.999827	0.947495	0.999827		abundance	150	150	pathways
UDPNACETYLGALSYN-PWY	Sex	Female	SexFemale	-2.72551e-06	-5.59283e-07	1.858e-06	0.947496	0.999827	0.947496	0.999827		abundance	150	150	pathways
RUMP-PWY	Sex	Female	SexFemale	1.58213e-06	-5.59283e-07	1.29578e-06	0.948054	0.999827	0.948054	0.999827		abundance	150	150	pathways
PWY-7761	Recovery	Recovered	RecoveryRecovered	4.05958e-09	7.6291e-07	8.31389e-06	0.948128	0.999827	0.948128	0.999827		abundance	150	150	pathways
DHGLUCONATE-PYR-CAT-PWY	Recovery	Recovered	RecoveryRecovered	2.37079e-07	7.6291e-07	2.28373e-07	0.948663	0.999827	0.948663	0.999827		abundance	150	150	pathways
PWY-7198	Sex	Female	SexFemale	1.66936e-06	-5.59283e-07	1.15185e-05	0.94895	0.999827	0.94895	0.999827		abundance	150	150	pathways
PWY4FS-8	Recovery	Recovered	RecoveryRecovered	-1.00597e-07	7.6291e-07	1.07545e-05	0.949064	0.999827	0.949064	0.999827		abundance	150	150	pathways
PWY-7357	Sex	Female	SexFemale	-2.76448e-06	-5.59283e-07	1.082e-05	0.949158	0.999827	0.949158	0.999827		abundance	150	150	pathways
COA-PWY	Recovery	Recovered	RecoveryRecovered	2.06156e-06	7.6291e-07	1.86597e-05	0.949221	0.999827	0.949221	0.999827		abundance	150	150	pathways
PWY-7371	Sex	Female	SexFemale	1.52531e-06	-5.59283e-07	3.24278e-06	0.949636	0.999827	0.949636	0.999827		abundance	150	150	pathways
PWY4FS-7	Recovery	Recovered	RecoveryRecovered	-7.16298e-08	7.6291e-07	1.07588e-05	0.95078	0.999827	0.95078	0.999827		abundance	150	150	pathways
PWY1G-0	Recovery	Recovered	RecoveryRecovered	2.61143e-07	7.6291e-07	1.63263e-07	0.951	0.999827	0.951	0.999827		abundance	150	150	pathways
PWY-7328	Recovery	Recovered	RecoveryRecovered	1.68347e-06	7.6291e-07	1.26375e-05	0.951255	0.999827	0.951255	0.999827		abundance	150	150	pathways
PWY-6435	Recovery	Recovered	RecoveryRecovered	1.34095e-06	7.6291e-07	4.78114e-06	0.95129	0.999827	0.95129	0.999827		abundance	150	150	pathways
ANAGLYCOLYSIS-PWY	Sex	Female	SexFemale	1.56757e-06	-5.59283e-07	1.16474e-05	0.951339	0.999827	0.951339	0.999827		abundance	150	150	pathways
PWY-5005	Sex	Female	SexFemale	-2.56042e-06	-5.59283e-07	4.68557e-06	0.951901	0.999827	0.951901	0.999827		abundance	150	150	pathways
PWY-3801	Recovery	Recovered	RecoveryRecovered	1.26407e-06	7.6291e-07	2.13308e-06	0.952633	0.999827	0.952633	0.999827		abundance	150	150	pathways
THREOCAT-PWY	Sex	Female	SexFemale	1.3975e-06	-5.59283e-07	3.39762e-06	0.952742	0.999827	0.952742	0.999827		abundance	150	150	pathways
PWY-6328	Sex	Female	SexFemale	-2.50593e-06	-5.59283e-07	1.51451e-06	0.952786	0.999827	0.952786	0.999827		abundance	150	150	pathways
PWY0-1533	Recovery	Recovered	RecoveryRecovered	1.24762e-06	7.6291e-07	8.4077e-07	0.952903	0.999827	0.952903	0.999827		abundance	150	150	pathways
PWY0-461	Sex	Female	SexFemale	-2.49412e-06	-5.59283e-07	1.69728e-06	0.953085	0.999827	0.953085	0.999827		abundance	150	150	pathways
PYRIDNUCSAL-PWY	Sex	Female	SexFemale	-2.52229e-06	-5.59283e-07	7.2066e-06	0.953447	0.999827	0.953447	0.999827		abundance	150	150	pathways
PWY-7688	Sex	Female	SexFemale	1.38713e-06	-5.59283e-07	6.03844e-06	0.95352	0.999827	0.95352	0.999827		abundance	150	150	pathways
PANTOSYN-PWY	Sex	Female	SexFemale	1.44291e-06	-5.59283e-07	1.08271e-05	0.953835	0.999827	0.953835	0.999827		abundance	150	150	pathways
PWY-5417	Sex	Female	SexFemale	1.31097e-06	-5.59283e-07	1.64572e-06	0.954645	0.999827	0.954645	0.999827		abundance	150	150	pathways
PWY-5431	Sex	Female	SexFemale	1.31097e-06	-5.59283e-07	1.64572e-06	0.954645	0.999827	0.954645	0.999827		abundance	150	150	pathways
POLYAMINSYN3-PWY	Sex	Female	SexFemale	1.296e-06	-5.59283e-07	1.28322e-06	0.954986	0.999827	0.954986	0.999827		abundance	150	150	pathways
PWY-5121	Sex	Female	SexFemale	1.35073e-06	-5.59283e-07	8.32932e-06	0.955048	0.999827	0.955048	0.999827		abundance	150	150	pathways
PWY-6876	Recovery	Recovered	RecoveryRecovered	3.01719e-07	7.6291e-07	7.28665e-07	0.955125	0.999827	0.955125	0.999827		abundance	150	150	pathways
P562-PWY	Recovery	Recovered	RecoveryRecovered	3.03614e-07	7.6291e-07	3.39517e-07	0.955173	0.999827	0.955173	0.999827		abundance	150	150	pathways
HCAMHPDEG-PWY	Recovery	Recovered	RecoveryRecovered	1.91722e-07	7.6291e-07	6.10032e-06	0.955331	0.999827	0.955331	0.999827		abundance	150	150	pathways
PWY-6690	Recovery	Recovered	RecoveryRecovered	1.91722e-07	7.6291e-07	6.10032e-06	0.955335	0.999827	0.955335	0.999827		abundance	150	150	pathways
PWY-5419	Recovery	Recovered	RecoveryRecovered	3.05653e-07	7.6291e-07	2.70528e-07	0.955357	0.999827	0.955357	0.999827		abundance	150	150	pathways
PWY-5910	Sex	Female	SexFemale	1.27478e-06	-5.59283e-07	1.33935e-06	0.955503	0.999827	0.955503	0.999827		abundance	150	150	pathways
PWY-5028	Sex	Female	SexFemale	1.2562e-06	-5.59283e-07	9.21684e-07	0.955935	0.999827	0.955935	0.999827		abundance	150	150	pathways
P122-PWY	Recovery	Recovered	RecoveryRecovered	2.70086e-07	7.6291e-07	3.96013e-06	0.956683	0.999827	0.956683	0.999827		abundance	150	150	pathways
PWY-5004	Recovery	Recovered	RecoveryRecovered	3.1918e-07	7.6291e-07	3.58506e-07	0.956695	0.999827	0.956695	0.999827		abundance	150	150	pathways
THRESYN-PWY	Recovery	Recovered	RecoveryRecovered	1.83232e-06	7.6291e-07	1.79627e-05	0.956825	0.999827	0.956825	0.999827		abundance	150	150	pathways
P185-PWY	Sex	Female	SexFemale	1.22709e-06	-5.59283e-07	4.61262e-06	0.957045	0.999827	0.957045	0.999827		abundance	150	150	pathways
PWY-7245	Sex	Female	SexFemale	1.21037e-06	-5.59283e-07	1.08607e-06	0.957052	0.999827	0.957052	0.999827		abundance	150	150	pathways
PWY-7874	Sex	Female	SexFemale	-2.31387e-06	-5.59283e-07	1.18265e-06	0.957422	0.999827	0.957422	0.999827		abundance	150	150	pathways
ARGSYN-PWY	Sex	Female	SexFemale	1.42719e-06	-5.59283e-07	1.80803e-05	0.957755	0.999827	0.957755	0.999827		abundance	150	150	pathways
PWY-6185	Sex	Female	SexFemale	1.17918e-06	-5.59283e-07	1.57703e-06	0.957834	0.999827	0.957834	0.999827		abundance	150	150	pathways
PWY-6628	Sex	Female	SexFemale	1.43722e-06	-5.59283e-07	1.87529e-05	0.957913	0.999827	0.957913	0.999827		abundance	150	150	pathways
PWY0-1221	Recovery	Recovered	RecoveryRecovered	1.20305e-06	7.6291e-07	1.72096e-06	0.957925	0.999827	0.957925	0.999827		abundance	150	150	pathways
PWY-6121	Recovery	Recovered	RecoveryRecovered	1.74267e-06	7.6291e-07	1.66901e-05	0.957988	0.999827	0.957988	0.999827		abundance	150	150	pathways
PWY-8190	Sex	Female	SexFemale	1.15532e-06	-5.59283e-07	5.50717e-07	0.95837	0.999827	0.95837	0.999827		abundance	150	150	pathways
PWY66-391	Sex	Female	SexFemale	1.10977e-06	-5.59283e-07	1.5774e-06	0.959516	0.999827	0.959516	0.999827		abundance	150	150	pathways
CATECHOL-ORTHO-CLEAVAGE-PWY	Sex	Female	SexFemale	1.10259e-06	-5.59283e-07	1.31594e-06	0.959676	0.999827	0.959676	0.999827		abundance	150	150	pathways
PWY-7031	Recovery	Recovered	RecoveryRecovered	3.49908e-07	7.6291e-07	7.31979e-07	0.959812	0.999827	0.959812	0.999827		abundance	150	150	pathways
P441-PWY	Recovery	Recovered	RecoveryRecovered	1.46403e-06	7.6291e-07	1.12838e-05	0.959879	0.999827	0.959879	0.999827		abundance	150	150	pathways
PWY-5918	Recovery	Recovered	RecoveryRecovered	1.75205e-07	7.6291e-07	8.52553e-06	0.960329	0.999827	0.960329	0.999827		abundance	150	150	pathways
PWY-6876	Sex	Female	SexFemale	1.06832e-06	-5.59283e-07	7.2554e-07	0.960485	0.999827	0.960485	0.999827		abundance	150	150	pathways
PWY-7328	Sex	Female	SexFemale	-2.28595e-06	-5.59283e-07	1.25833e-05	0.96085	0.999827	0.96085	0.999827		abundance	150	150	pathways
URSIN-PWY	Recovery	Recovered	RecoveryRecovered	3.62597e-07	7.6291e-07	3.73062e-07	0.960931	0.999827	0.960931	0.999827		abundance	150	150	pathways
PWY-6182	Sex	Female	SexFemale	1.01786e-06	-5.59283e-07	1.37411e-06	0.961733	0.999827	0.961733	0.999827		abundance	150	150	pathways
PWY-5989	Sex	Female	SexFemale	-2.21661e-06	-5.59283e-07	1.07152e-05	0.961741	0.999827	0.961741	0.999827		abundance	150	150	pathways
PWY-7316	Recovery	Recovered	RecoveryRecovered	2.5007e-07	7.6291e-07	7.01351e-06	0.962024	0.999827	0.962024	0.999827		abundance	150	150	pathways
PWY-6385	Recovery	Recovered	RecoveryRecovered	-1.35349e-07	7.6291e-07	1.70445e-05	0.962146	0.999827	0.962146	0.999827		abundance	150	150	pathways
P221-PWY	Sex	Female	SexFemale	-2.11407e-06	-5.59283e-07	2.36512e-06	0.962339	0.999827	0.962339	0.999827		abundance	150	150	pathways
PWY-5392	Recovery	Recovered	RecoveryRecovered	3.76324e-07	7.6291e-07	8.62907e-07	0.962438	0.999827	0.962438	0.999827		abundance	150	150	pathways
PWY-801	Sex	Female	SexFemale	-2.09812e-06	-5.59283e-07	2.50657e-06	0.962737	0.999827	0.962737	0.999827		abundance	150	150	pathways
PWY-5870	Recovery	Recovered	RecoveryRecovered	3.83082e-07	7.6291e-07	5.63662e-07	0.962977	0.999827	0.962977	0.999827		abundance	150	150	pathways
PWY-6565	Sex	Female	SexFemale	9.63813e-07	-5.59283e-07	9.20352e-07	0.963026	0.999827	0.963026	0.999827		abundance	150	150	pathways
3-HYDROXYPHENYLACETATE-DEGRADATION-PWY	Sex	Female	SexFemale	-2.06957e-06	-5.59283e-07	2.14443e-06	0.9634	0.999827	0.9634	0.999827		abundance	150	150	pathways
ASPASN-PWY	Sex	Female	SexFemale	1.01736e-06	-5.59283e-07	1.10367e-05	0.963708	0.999827	0.963708	0.999827		abundance	150	150	pathways
CITRULBIO-PWY	Sex	Female	SexFemale	-2.13446e-06	-5.59283e-07	1.1491e-05	0.963897	0.999827	0.963897	0.999827		abundance	150	150	pathways
PANTO-PWY	Sex	Female	SexFemale	-2.102e-06	-5.59283e-07	1.01618e-05	0.964211	0.999827	0.964211	0.999827		abundance	150	150	pathways
PWY-7209	Sex	Female	SexFemale	-2.02817e-06	-5.59283e-07	3.83039e-06	0.964567	0.999827	0.964567	0.999827		abundance	150	150	pathways
PWY-5345	Sex	Female	SexFemale	9.46426e-07	-5.59283e-07	1.0098e-05	0.965049	0.999827	0.965049	0.999827		abundance	150	150	pathways
PWY-5994	Sex	Female	SexFemale	-2.0259e-06	-5.59283e-07	7.84046e-06	0.965356	0.999827	0.965356	0.999827		abundance	150	150	pathways
ARGININE-SYN4-PWY	Sex	Female	SexFemale	9.28483e-07	-5.59283e-07	1.11312e-05	0.965784	0.999827	0.965784	0.999827		abundance	150	150	pathways
PWY-2942	Recovery	Recovered	RecoveryRecovered	1.65114e-06	7.6291e-07	1.90402e-05	0.965841	0.999827	0.965841	0.999827		abundance	150	150	pathways
PWY-6859	Sex	Female	SexFemale	8.38897e-07	-5.59283e-07	4.04061e-06	0.966297	0.999827	0.966297	0.999827		abundance	150	150	pathways
PWY-5675	Recovery	Recovered	RecoveryRecovered	1.41151e-06	7.6291e-07	1.30555e-05	0.96643	0.999827	0.96643	0.999827		abundance	150	150	pathways
DENITRIFICATION-PWY	Sex	Female	SexFemale	8.12475e-07	-5.59283e-07	6.6749e-07	0.966691	0.999827	0.966691	0.999827		abundance	150	150	pathways
PROTOCATECHUATE-ORTHO-CLEAVAGE-PWY	Recovery	Recovered	RecoveryRecovered	1.11112e-06	7.6291e-07	1.89254e-06	0.966855	0.999827	0.966855	0.999827		abundance	150	150	pathways
PWY-6317	Sex	Female	SexFemale	-2.04961e-06	-5.59283e-07	1.48979e-05	0.967044	0.999827	0.967044	0.999827		abundance	150	150	pathways
PWY-7391	Sex	Female	SexFemale	7.93908e-07	-5.59283e-07	7.20721e-07	0.967143	0.999827	0.967143	0.999827		abundance	150	150	pathways
DENOVOPURINE2-PWY	Recovery	Recovered	RecoveryRecovered	1.23088e-06	7.6291e-07	7.93691e-06	0.967232	0.999827	0.967232	0.999827		abundance	150	150	pathways
PWY-7948	Recovery	Recovered	RecoveryRecovered	4.30565e-07	7.6291e-07	6.90486e-07	0.967642	0.999827	0.967642	0.999827		abundance	150	150	pathways
PWY-7373	Recovery	Recovered	RecoveryRecovered	4.30343e-07	7.6291e-07	1.61108e-06	0.968116	0.999827	0.968116	0.999827		abundance	150	150	pathways
P162-PWY	Sex	Female	SexFemale	7.43753e-07	-5.59283e-07	3.25131e-07	0.968354	0.999827	0.968354	0.999827		abundance	150	150	pathways
PWY-7111	Recovery	Recovered	RecoveryRecovered	-3.64608e-07	7.6291e-07	2.7259e-05	0.968445	0.999827	0.968445	0.999827		abundance	150	150	pathways
PWY-5505	Sex	Female	SexFemale	-1.86852e-06	-5.59283e-07	4.66485e-06	0.968518	0.999827	0.968518	0.999827		abundance	150	150	pathways
PWY-6215	Recovery	Recovered	RecoveryRecovered	4.41837e-07	7.6291e-07	4.52195e-07	0.968675	0.999827	0.968675	0.999827		abundance	150	150	pathways
PWY-5861	Recovery	Recovered	RecoveryRecovered	2.9642e-07	7.6291e-07	8.79378e-06	0.969014	0.999827	0.969014	0.999827		abundance	150	150	pathways
PWY-3801	Sex	Female	SexFemale	7.16752e-07	-5.59283e-07	2.12393e-06	0.969072	0.999827	0.969072	0.999827		abundance	150	150	pathways
DENITRIFICATION-PWY	Recovery	Recovered	RecoveryRecovered	4.49213e-07	7.6291e-07	6.70365e-07	0.96945	0.999827	0.96945	0.999827		abundance	150	150	pathways
PWY-5420	Recovery	Recovered	RecoveryRecovered	4.50972e-07	7.6291e-07	3.9655e-07	0.969555	0.999827	0.969555	0.999827		abundance	150	150	pathways
GLUCONEO-PWY	Sex	Female	SexFemale	-1.79233e-06	-5.59283e-07	7.78359e-06	0.97086	0.999827	0.97086	0.999827		abundance	150	150	pathways
DENOVOPURINE2-PWY	Sex	Female	SexFemale	-1.78528e-06	-5.59283e-07	7.90287e-06	0.971049	0.999827	0.971049	0.999827		abundance	150	150	pathways
PWY-6572	Sex	Female	SexFemale	6.17447e-07	-5.59283e-07	7.59907e-07	0.971426	0.999827	0.971426	0.999827		abundance	150	150	pathways
PWY5F9-12	Recovery	Recovered	RecoveryRecovered	4.72338e-07	7.6291e-07	2.71937e-07	0.971622	0.999827	0.971622	0.999827		abundance	150	150	pathways
PWY-2221	Recovery	Recovered	RecoveryRecovered	4.72577e-07	7.6291e-07	2.80932e-07	0.971647	0.999827	0.971647	0.999827		abundance	150	150	pathways
PWY66-367	Sex	Female	SexFemale	6.06925e-07	-5.59283e-07	7.77093e-07	0.971682	0.999827	0.971682	0.999827		abundance	150	150	pathways
P124-PWY	Recovery	Recovered	RecoveryRecovered	1.34615e-06	7.6291e-07	1.43538e-05	0.971853	0.999827	0.971853	0.999827		abundance	150	150	pathways
PWY-5178	Sex	Female	SexFemale	5.97325e-07	-5.59283e-07	4.07864e-07	0.971909	0.999827	0.971909	0.999827		abundance	150	150	pathways
PWY-5088	Sex	Female	SexFemale	5.94108e-07	-5.59283e-07	8.84475e-07	0.971995	0.999827	0.971995	0.999827		abundance	150	150	pathways
PWY0-41	Recovery	Recovered	RecoveryRecovered	1.05051e-06	7.6291e-07	1.21028e-06	0.972199	0.999827	0.972199	0.999827		abundance	150	150	pathways
PWY-6143	Sex	Female	SexFemale	5.73666e-07	-5.59283e-07	8.12115e-07	0.97249	0.999827	0.97249	0.999827		abundance	150	150	pathways
UBISYN-PWY	Sex	Female	SexFemale	-1.68988e-06	-5.59283e-07	1.1644e-06	0.972556	0.999827	0.972556	0.999827		abundance	150	150	pathways
PWY0-1533	Sex	Female	SexFemale	-1.6881e-06	-5.59283e-07	8.37164e-07	0.972591	0.999827	0.972591	0.999827		abundance	150	150	pathways
PWY-821	Sex	Female	SexFemale	5.90357e-07	-5.59283e-07	7.37627e-06	0.972756	0.999827	0.972756	0.999827		abundance	150	150	pathways
PWY-7820	Sex	Female	SexFemale	5.5187e-07	-5.59283e-07	2.93767e-07	0.973012	0.999827	0.973012	0.999827		abundance	150	150	pathways
P164-PWY	Recovery	Recovered	RecoveryRecovered	4.68603e-07	7.6291e-07	3.5285e-06	0.973605	0.999827	0.973605	0.999827		abundance	150	150	pathways
PWY-7323	Sex	Female	SexFemale	-1.6564e-06	-5.59283e-07	6.35064e-06	0.973837	0.999827	0.973837	0.999827		abundance	150	150	pathways
ILEUSYN-PWY	Sex	Female	SexFemale	6.53489e-07	-5.59283e-07	1.74465e-05	0.973995	0.999827	0.973995	0.999827		abundance	150	150	pathways
PWY-7196	Sex	Female	SexFemale	-1.63113e-06	-5.59283e-07	1.92579e-06	0.97401	0.999827	0.97401	0.999827		abundance	150	150	pathways
PWY-5677	Sex	Female	SexFemale	5.07279e-07	-5.59283e-07	4.59651e-07	0.974096	0.999827	0.974096	0.999827		abundance	150	150	pathways
PYRIDNUCSYN-PWY	Sex	Female	SexFemale	5.80308e-07	-5.59283e-07	1.31646e-05	0.974313	0.999827	0.974313	0.999827		abundance	150	150	pathways
PWY-7117	Recovery	Recovered	RecoveryRecovered	1.31492e-06	7.6291e-07	1.51068e-05	0.97438	0.999827	0.97438	0.999827		abundance	150	150	pathways
PWY-7783	Sex	Female	SexFemale	4.92067e-07	-5.59283e-07	4.79627e-07	0.974466	0.999827	0.974466	0.999827		abundance	150	150	pathways
PWY-7723	Sex	Female	SexFemale	4.82437e-07	-5.59283e-07	1.0824e-06	0.97471	0.999827	0.97471	0.999827		abundance	150	150	pathways
PWY-7385	Sex	Female	SexFemale	-1.5925e-06	-5.59283e-07	3.3057e-06	0.975029	0.999827	0.975029	0.999827		abundance	150	150	pathways
PWY-5392	Sex	Female	SexFemale	4.62358e-07	-5.59283e-07	8.59206e-07	0.975193	0.999827	0.975193	0.999827		abundance	150	150	pathways
ALLANTOINDEG-PWY	Sex	Female	SexFemale	4.58335e-07	-5.59283e-07	1.11491e-06	0.975296	0.999827	0.975296	0.999827		abundance	150	150	pathways
PWY-6708	Sex	Female	SexFemale	-1.57669e-06	-5.59283e-07	1.08267e-06	0.9753	0.999827	0.9753	0.999827		abundance	150	150	pathways
PWY-6703	Recovery	Recovered	RecoveryRecovered	3.04348e-07	7.6291e-07	1.27592e-05	0.975876	0.999827	0.975876	0.999827		abundance	150	150	pathways
CARNMET-PWY	Sex	Female	SexFemale	-1.55235e-06	-5.59283e-07	9.1945e-07	0.975887	0.999827	0.975887	0.999827		abundance	150	150	pathways
PWY0-1241	Sex	Female	SexFemale	4.44806e-07	-5.59283e-07	5.88618e-06	0.975993	0.999827	0.975993	0.999827		abundance	150	150	pathways
ARGSYNBSUB-PWY	Sex	Female	SexFemale	-1.6966e-06	-5.59283e-07	1.89331e-05	0.976074	0.999827	0.976074	0.999827		abundance	150	150	pathways
TRNA-CHARGING-PWY	Sex	Female	SexFemale	5.10906e-07	-5.59283e-07	1.40201e-05	0.976099	0.999827	0.976099	0.999827		abundance	150	150	pathways
ALL-CHORISMATE-PWY	Sex	Female	SexFemale	-1.52191e-06	-5.59283e-07	1.76491e-06	0.976651	0.999827	0.976651	0.999827		abundance	150	150	pathways
PWY-7039	Sex	Female	SexFemale	3.99311e-07	-5.59283e-07	1.12735e-06	0.976729	0.999827	0.976729	0.999827		abundance	150	150	pathways
PWY-5705	Recovery	Recovered	RecoveryRecovered	1.005e-06	7.6291e-07	1.50541e-06	0.976734	0.999827	0.976734	0.999827		abundance	150	150	pathways
PWY-801	Recovery	Recovered	RecoveryRecovered	5.15444e-07	7.6291e-07	2.51737e-06	0.976889	0.999827	0.976889	0.999827		abundance	150	150	pathways
PWY-5747	Sex	Female	SexFemale	-1.4961e-06	-5.59283e-07	2.48076e-06	0.977309	0.999827	0.977309	0.999827		abundance	150	150	pathways
PWY0-1297	Sex	Female	SexFemale	-1.55361e-06	-5.59283e-07	1.41839e-05	0.97783	0.999827	0.97783	0.999827		abundance	150	150	pathways
PWY-1861	Sex	Female	SexFemale	3.55165e-07	-5.59283e-07	5.34283e-06	0.978076	0.999827	0.978076	0.999827		abundance	150	150	pathways
PRPP-PWY	Recovery	Recovered	RecoveryRecovered	4.55352e-07	7.6291e-07	7.89164e-06	0.978409	0.999827	0.978409	0.999827		abundance	150	150	pathways
PWY-5028	Recovery	Recovered	RecoveryRecovered	9.85035e-07	7.6291e-07	9.25653e-07	0.978431	0.999827	0.978431	0.999827		abundance	150	150	pathways
PWY-6185	Recovery	Recovered	RecoveryRecovered	9.87258e-07	7.6291e-07	1.58382e-06	0.978475	0.999827	0.978475	0.999827		abundance	150	150	pathways
GLYCOLYSIS-TCA-GLYOX-BYPASS	Sex	Female	SexFemale	3.32883e-07	-5.59283e-07	3.96957e-06	0.978485	0.999827	0.978485	0.999827		abundance	150	150	pathways
PWY66-388	Sex	Female	SexFemale	3.12962e-07	-5.59283e-07	2.24119e-07	0.978813	0.999827	0.978813	0.999827		abundance	150	150	pathways
PWY-5705	Sex	Female	SexFemale	-1.42802e-06	-5.59283e-07	1.49896e-06	0.978919	0.999827	0.978919	0.999827		abundance	150	150	pathways
DTDPRHAMSYN-PWY	Sex	Female	SexFemale	7.48687e-07	-5.59283e-07	3.75274e-05	0.979095	0.999827	0.979095	0.999827		abundance	150	150	pathways
PWY-7434	Sex	Female	SexFemale	2.9938e-07	-5.59283e-07	2.17801e-07	0.979142	0.999827	0.979142	0.999827		abundance	150	150	pathways
PWY-7269	Sex	Female	SexFemale	-1.41936e-06	-5.59283e-07	2.25241e-06	0.979156	0.999827	0.979156	0.999827		abundance	150	150	pathways
GLYCOGENSYNTH-PWY	Sex	Female	SexFemale	-1.51608e-06	-5.59283e-07	1.63468e-05	0.979198	0.999827	0.979198	0.999827		abundance	150	150	pathways
PWY-5130	Sex	Female	SexFemale	2.83869e-07	-5.59283e-07	4.44531e-06	0.979704	0.999827	0.979704	0.999827		abundance	150	150	pathways
PWY-7294	Sex	Female	SexFemale	-1.39165e-06	-5.59283e-07	1.00043e-06	0.97979	0.999827	0.97979	0.999827		abundance	150	150	pathways
PWY-5188	Sex	Female	SexFemale	-1.40643e-06	-5.59283e-07	9.16586e-06	0.98018	0.999827	0.98018	0.999827		abundance	150	150	pathways
PWY-724	Sex	Female	SexFemale	3.34059e-07	-5.59283e-07	1.61428e-05	0.980531	0.999827	0.980531	0.999827		abundance	150	150	pathways
PWY-5855	Sex	Female	SexFemale	-1.3614e-06	-5.59283e-07	2.14375e-06	0.980557	0.999827	0.980557	0.999827		abundance	150	150	pathways
PWY-7396	Recovery	Recovered	RecoveryRecovered	9.61882e-07	7.6291e-07	9.54098e-07	0.980686	0.999827	0.980686	0.999827		abundance	150	150	pathways
PWY-5913	Recovery	Recovered	RecoveryRecovered	3.7208e-07	7.6291e-07	1.43251e-05	0.981113	0.999827	0.981113	0.999827		abundance	150	150	pathways
METH-ACETATE-PWY	Recovery	Recovered	RecoveryRecovered	9.56066e-07	7.6291e-07	9.12314e-07	0.981239	0.999827	0.981239	0.999827		abundance	150	150	pathways
PWY-7031	Sex	Female	SexFemale	2.09775e-07	-5.59283e-07	7.28841e-07	0.981323	0.999827	0.981323	0.999827		abundance	150	150	pathways
PWY-7616	Recovery	Recovered	RecoveryRecovered	5.72754e-07	7.6291e-07	7.19181e-07	0.981488	0.999827	0.981488	0.999827		abundance	150	150	pathways
PWY-7340	Sex	Female	SexFemale	2.01641e-07	-5.59283e-07	8.45594e-07	0.981522	0.999827	0.981522	0.999827		abundance	150	150	pathways
1CMET2-PWY	Sex	Female	SexFemale	2.26087e-07	-5.59283e-07	8.54631e-06	0.981539	0.999827	0.981539	0.999827		abundance	150	150	pathways
PWY-7196	Recovery	Recovered	RecoveryRecovered	5.71618e-07	7.6291e-07	1.93408e-06	0.981808	0.999827	0.981808	0.999827		abundance	150	150	pathways
PWY-7312	Recovery	Recovered	RecoveryRecovered	5.77151e-07	7.6291e-07	6.44474e-07	0.981902	0.999827	0.981902	0.999827		abundance	150	150	pathways
KETOGLUCONMET-PWY	Sex	Female	SexFemale	1.94943e-07	-5.59283e-07	6.103e-06	0.981988	0.999827	0.981988	0.999827		abundance	150	150	pathways
TYRFUMCAT-PWY	Sex	Female	SexFemale	1.81302e-07	-5.59283e-07	1.66782e-07	0.98201	0.999827	0.98201	0.999827		abundance	150	150	pathways
NONMEVIPP-PWY	Sex	Female	SexFemale	2.66792e-07	-5.59283e-07	1.6998e-05	0.982184	0.999827	0.982184	0.999827		abundance	150	150	pathways
PWY-7290	Sex	Female	SexFemale	1.68559e-07	-5.59283e-07	1.89601e-07	0.982319	0.999827	0.982319	0.999827		abundance	150	150	pathways
PWY-6210	Sex	Female	SexFemale	1.5943e-07	-5.59283e-07	3.72926e-07	0.982542	0.999827	0.982542	0.999827		abundance	150	150	pathways
PWY-5654	Sex	Female	SexFemale	1.58534e-07	-5.59283e-07	3.72928e-07	0.982564	0.999827	0.982564	0.999827		abundance	150	150	pathways
PWY-6953	Sex	Female	SexFemale	1.6063e-07	-5.59283e-07	4.97305e-06	0.982709	0.999827	0.982709	0.999827		abundance	150	150	pathways
PWY5F9-12	Sex	Female	SexFemale	1.42044e-07	-5.59283e-07	2.70771e-07	0.982964	0.999827	0.982964	0.999827		abundance	150	150	pathways
PWY0-881	Sex	Female	SexFemale	1.40993e-07	-5.59283e-07	1.54111e-07	0.982989	0.999827	0.982989	0.999827		abundance	150	150	pathways
PWY-7736	Sex	Female	SexFemale	1.10197e-07	-5.59283e-07	2.14808e-07	0.983737	0.999827	0.983737	0.999827		abundance	150	150	pathways
PWY-7873	Sex	Female	SexFemale	-1.22181e-06	-5.59283e-07	9.03814e-07	0.983912	0.999827	0.983912	0.999827		abundance	150	150	pathways
PWY-7159	Sex	Female	SexFemale	9.40404e-08	-5.59283e-07	4.64087e-08	0.984129	0.999827	0.984129	0.999827		abundance	150	150	pathways
PWY-5531	Sex	Female	SexFemale	9.36769e-08	-5.59283e-07	4.61898e-08	0.984138	0.999827	0.984138	0.999827		abundance	150	150	pathways
P621-PWY	Sex	Female	SexFemale	-1.20584e-06	-5.59283e-07	1.83418e-06	0.984318	0.999827	0.984318	0.999827		abundance	150	150	pathways
PWY-1541	Sex	Female	SexFemale	8.05623e-08	-5.59283e-07	7.06033e-08	0.984457	0.999827	0.984457	0.999827		abundance	150	150	pathways
GLYCOLYSIS-E-D	Recovery	Recovered	RecoveryRecovered	5.35149e-07	7.6291e-07	8.57082e-06	0.984662	0.999827	0.984662	0.999827		abundance	150	150	pathways
CRNFORCAT-PWY	Sex	Female	SexFemale	7.1054e-08	-5.59283e-07	3.41634e-07	0.984688	0.999827	0.984688	0.999827		abundance	150	150	pathways
PWY-6957	Sex	Female	SexFemale	7.01214e-08	-5.59283e-07	1.09759e-07	0.98471	0.999827	0.98471	0.999827		abundance	150	150	pathways
PWY-5514	Sex	Female	SexFemale	-1.18203e-06	-5.59283e-07	5.83987e-07	0.984874	0.999827	0.984874	0.999827		abundance	150	150	pathways
ARO-PWY	Recovery	Recovered	RecoveryRecovered	1.11075e-06	7.6291e-07	1.64686e-05	0.984917	0.999827	0.984917	0.999827		abundance	150	150	pathways
PWY-7396	Sex	Female	SexFemale	5.51314e-08	-5.59283e-07	9.50007e-07	0.98508	0.999827	0.98508	0.999827		abundance	150	150	pathways
PWY-5417	Recovery	Recovered	RecoveryRecovered	9.17828e-07	7.6291e-07	1.65281e-06	0.98516	0.999827	0.98516	0.999827		abundance	150	150	pathways
PWY-5431	Recovery	Recovered	RecoveryRecovered	9.17828e-07	7.6291e-07	1.65281e-06	0.98516	0.999827	0.98516	0.999827		abundance	150	150	pathways
PWY-6518	Sex	Female	SexFemale	5.0099e-08	-5.59283e-07	5.11499e-08	0.985196	0.999827	0.985196	0.999827		abundance	150	150	pathways
PWY-7392	Sex	Female	SexFemale	6.1376e-08	-5.59283e-07	6.97397e-06	0.985253	0.999827	0.985253	0.999827		abundance	150	150	pathways
PWY-7731	Sex	Female	SexFemale	4.45478e-08	-5.59283e-07	4.57361e-08	0.985331	0.999827	0.985331	0.999827		abundance	150	150	pathways
PWY1G-0	Sex	Female	SexFemale	4.39612e-08	-5.59283e-07	1.62563e-07	0.985346	0.999827	0.985346	0.999827		abundance	150	150	pathways
PWY-5088	Recovery	Recovered	RecoveryRecovered	9.12665e-07	7.6291e-07	8.88284e-07	0.98545	0.999827	0.98545	0.999827		abundance	150	150	pathways
PWY-6383	Sex	Female	SexFemale	3.20633e-08	-5.59283e-07	3.23449e-08	0.985635	0.999827	0.985635	0.999827		abundance	150	150	pathways
PWY-101	Sex	Female	SexFemale	3.00137e-08	-5.59283e-07	3.07745e-08	0.985684	0.999827	0.985684	0.999827		abundance	150	150	pathways
PWY-6084	Sex	Female	SexFemale	2.55405e-08	-5.59283e-07	2.23832e-08	0.985793	0.999827	0.985793	0.999827		abundance	150	150	pathways
14DICHLORBENZDEG-PWY	Sex	Female	SexFemale	2.55405e-08	-5.59283e-07	2.23832e-08	0.985793	0.999827	0.985793	0.999827		abundance	150	150	pathways
DHGLUCONATE-PYR-CAT-PWY	Sex	Female	SexFemale	2.53058e-08	-5.59283e-07	2.27394e-07	0.985799	0.999827	0.985799	0.999827		abundance	150	150	pathways
PWY-1361	Sex	Female	SexFemale	2.23757e-08	-5.59283e-07	1.96096e-08	0.98587	0.999827	0.98587	0.999827		abundance	150	150	pathways
COLANSYN-PWY	Sex	Female	SexFemale	3.68304e-08	-5.59283e-07	7.75448e-06	0.985907	0.999827	0.985907	0.999827		abundance	150	150	pathways
CHLOROPHYLL-SYN	Sex	Female	SexFemale	2.04871e-08	-5.59283e-07	2.0667e-08	0.985916	0.999827	0.985916	0.999827		abundance	150	150	pathways
LEU-DEG2-PWY	Sex	Female	SexFemale	2.00294e-08	-5.59283e-07	1.75534e-08	0.985927	0.999827	0.985927	0.999827		abundance	150	150	pathways
PWY-7384	Sex	Female	SexFemale	2.01372e-08	-5.59283e-07	8.67058e-07	0.985929	0.999827	0.985929	0.999827		abundance	150	150	pathways
PWY0-1277	Recovery	Recovered	RecoveryRecovered	5.73364e-07	7.6291e-07	7.05555e-06	0.985987	0.999827	0.985987	0.999827		abundance	150	150	pathways
PWY-7399	Sex	Female	SexFemale	1.72314e-08	-5.59283e-07	4.91024e-08	0.985995	0.999827	0.985995	0.999827		abundance	150	150	pathways
P101-PWY	Sex	Female	SexFemale	1.3565e-08	-5.59283e-07	1.36841e-08	0.986084	0.999827	0.986084	0.999827		abundance	150	150	pathways
NADSYN-PWY	Sex	Female	SexFemale	1.2917e-08	-5.59283e-07	1.30305e-08	0.9861	0.999827	0.9861	0.999827		abundance	150	150	pathways
PWY-7374	Sex	Female	SexFemale	1.25178e-08	-5.59283e-07	1.26277e-08	0.986109	0.999827	0.986109	0.999827		abundance	150	150	pathways
PWY-7090	Sex	Female	SexFemale	1.21571e-08	-5.59283e-07	1.06543e-08	0.986118	0.999827	0.986118	0.999827		abundance	150	150	pathways
PWY-6662	Sex	Female	SexFemale	8.212e-09	-5.59283e-07	8.28412e-09	0.986214	0.999827	0.986214	0.999827		abundance	150	150	pathways
PWY-5651	Sex	Female	SexFemale	8.07728e-09	-5.59283e-07	8.14822e-09	0.986217	0.999827	0.986217	0.999827		abundance	150	150	pathways
PWY-5430	Sex	Female	SexFemale	6.45135e-09	-5.59283e-07	3.42796e-08	0.986257	0.999827	0.986257	0.999827		abundance	150	150	pathways
PWY-5742	Sex	Female	SexFemale	5.74854e-09	-5.59283e-07	5.79902e-09	0.986274	0.999827	0.986274	0.999827		abundance	150	150	pathways
PWY-7124	Sex	Female	SexFemale	5.21943e-09	-5.59283e-07	5.87646e-09	0.986287	0.999827	0.986287	0.999827		abundance	150	150	pathways
PWY-7218	Sex	Female	SexFemale	5.14137e-09	-5.59283e-07	5.81692e-09	0.986288	0.999827	0.986288	0.999827		abundance	150	150	pathways
PHOTOALL-PWY	Sex	Female	SexFemale	2.63837e-09	-5.59283e-07	2.96738e-09	0.986349	0.999827	0.986349	0.999827		abundance	150	150	pathways
PWY-7905	Sex	Female	SexFemale	9.525e-10	-5.59283e-07	4.37756e-09	0.98639	0.999827	0.98639	0.999827		abundance	150	150	pathways
PWY-5647	Sex	Female	SexFemale	7.61208e-10	-5.59283e-07	7.67894e-10	0.986395	0.999827	0.986395	0.999827		abundance	150	150	pathways
PWY-7511	Sex	Female	SexFemale	-2.43436e-09	-5.59283e-07	2.39687e-09	0.986473	0.999827	0.986473	0.999827		abundance	150	150	pathways
PWY-7420	Sex	Female	SexFemale	-3.99905e-09	-5.59283e-07	3.93747e-09	0.986511	0.999827	0.986511	0.999827		abundance	150	150	pathways
PWY-5494	Sex	Female	SexFemale	-5.31285e-09	-5.59283e-07	1.46295e-08	0.986542	0.999827	0.986542	0.999827		abundance	150	150	pathways
PWY-6837	Sex	Female	SexFemale	-5.78383e-09	-5.59283e-07	6.6542e-09	0.986554	0.999827	0.986554	0.999827		abundance	150	150	pathways
PWY-5129	Sex	Female	SexFemale	-7.25881e-09	-5.59283e-07	7.14703e-09	0.98659	0.999827	0.98659	0.999827		abundance	150	150	pathways
PWY-6421	Sex	Female	SexFemale	-7.38074e-09	-5.59283e-07	8.49142e-09	0.986593	0.999827	0.986593	0.999827		abundance	150	150	pathways
PWY-7337	Sex	Female	SexFemale	-7.56182e-09	-5.59283e-07	8.69975e-09	0.986597	0.999827	0.986597	0.999827		abundance	150	150	pathways
PWY-7338	Sex	Female	SexFemale	-7.56182e-09	-5.59283e-07	8.69975e-09	0.986597	0.999827	0.986597	0.999827		abundance	150	150	pathways
PWY-6583	Sex	Female	SexFemale	-7.77175e-09	-5.59283e-07	7.65208e-09	0.986602	0.999827	0.986602	0.999827		abundance	150	150	pathways
PWY-5079	Sex	Female	SexFemale	-9.14733e-09	-5.59283e-07	9.00647e-09	0.986636	0.999827	0.986636	0.999827		abundance	150	150	pathways
PWY-8055	Sex	Female	SexFemale	-9.65137e-09	-5.59283e-07	9.50275e-09	0.986648	0.999827	0.986648	0.999827		abundance	150	150	pathways
GLUDEG-II-PWY	Sex	Female	SexFemale	-1.08667e-08	-5.59283e-07	1.06994e-08	0.986677	0.999827	0.986677	0.999827		abundance	150	150	pathways
PWY-7373	Sex	Female	SexFemale	-1.10041e-08	-5.59283e-07	1.60418e-06	0.986697	0.999827	0.986697	0.999827		abundance	150	150	pathways
PWY-8189	Sex	Female	SexFemale	-1.16649e-08	-5.59283e-07	3.24836e-08	0.986697	0.999827	0.986697	0.999827		abundance	150	150	pathways
PROPFERM-PWY	Sex	Female	SexFemale	-1.16649e-08	-5.59283e-07	3.24836e-08	0.986697	0.999827	0.986697	0.999827		abundance	150	150	pathways
PWY-8188	Sex	Female	SexFemale	-1.16649e-08	-5.59283e-07	3.24836e-08	0.986697	0.999827	0.986697	0.999827		abundance	150	150	pathways
PWY-6594	Sex	Female	SexFemale	-1.20973e-08	-5.59283e-07	1.1911e-08	0.986707	0.999827	0.986707	0.999827		abundance	150	150	pathways
PWY-7800	Sex	Female	SexFemale	-1.4098e-08	-5.59283e-07	1.38809e-08	0.986756	0.999827	0.986756	0.999827		abundance	150	150	pathways
PWY-6604	Sex	Female	SexFemale	-1.64851e-08	-5.59283e-07	1.62313e-08	0.986814	0.999827	0.986814	0.999827		abundance	150	150	pathways
PWY-1501	Sex	Female	SexFemale	-1.84382e-08	-5.59283e-07	4.76291e-08	0.986861	0.999827	0.986861	0.999827		abundance	150	150	pathways
P163-PWY	Sex	Female	SexFemale	-2.26121e-08	-5.59283e-07	1.60605e-08	0.986963	0.999827	0.986963	0.999827		abundance	150	150	pathways
PWY-7376	Sex	Female	SexFemale	-2.33991e-08	-5.59283e-07	2.69203e-08	0.986982	0.999827	0.986982	0.999827		abundance	150	150	pathways
PWY-6748	Sex	Female	SexFemale	-4.08913e-08	-5.59283e-07	7.73919e-08	0.987407	0.999827	0.987407	0.999827		abundance	150	150	pathways
PWY-5022	Sex	Female	SexFemale	-3.41314e-08	-5.59283e-07	5.54644e-06	0.987421	0.999827	0.987421	0.999827		abundance	150	150	pathways
PWY66-398	Sex	Female	SexFemale	-4.25487e-08	-5.59283e-07	4.18935e-08	0.987447	0.999827	0.987447	0.999827		abundance	150	150	pathways
PWY-6562	Recovery	Recovered	RecoveryRecovered	8.92309e-07	7.6291e-07	1.29622e-06	0.987509	0.999827	0.987509	0.999827		abundance	150	150	pathways
12DICHLORETHDEG-PWY	Sex	Female	SexFemale	-4.59764e-08	-5.59283e-07	3.2503e-08	0.98753	0.999827	0.98753	0.999827		abundance	150	150	pathways
PWY-5873	Sex	Female	SexFemale	-4.66995e-08	-5.59283e-07	3.69858e-08	0.987548	0.999827	0.987548	0.999827		abundance	150	150	pathways
PWY-7279	Sex	Female	SexFemale	-5.1611e-08	-5.59283e-07	1.98836e-07	0.987667	0.999827	0.987667	0.999827		abundance	150	150	pathways
PWY-3781	Sex	Female	SexFemale	-5.25833e-08	-5.59283e-07	2.66513e-07	0.987691	0.999827	0.987691	0.999827		abundance	150	150	pathways
PWY-7400	Recovery	Recovered	RecoveryRecovered	4.8491e-07	7.6291e-07	1.61791e-05	0.987777	0.999827	0.987777	0.999827		abundance	150	150	pathways
PWY-7009	Sex	Female	SexFemale	-6.48367e-08	-5.59283e-07	1.35311e-07	0.987988	0.999827	0.987988	0.999827		abundance	150	150	pathways
PWY-5910	Recovery	Recovered	RecoveryRecovered	8.86696e-07	7.6291e-07	1.34511e-06	0.988063	0.999827	0.988063	0.999827		abundance	150	150	pathways
PWY-6071	Sex	Female	SexFemale	-1.04633e-06	-5.59283e-07	7.89745e-07	0.988171	0.999827	0.988171	0.999827		abundance	150	150	pathways
PWY-1269	Sex	Female	SexFemale	-5.1839e-08	-5.59283e-07	1.11831e-05	0.988332	0.999827	0.988332	0.999827		abundance	150	150	pathways
PWY-6922	Sex	Female	SexFemale	-1.03828e-06	-5.59283e-07	1.75703e-06	0.98838	0.999827	0.98838	0.999827		abundance	150	150	pathways
CRNFORCAT-PWY	Recovery	Recovered	RecoveryRecovered	6.45527e-07	7.6291e-07	3.43105e-07	0.988538	0.999827	0.988538	0.999827		abundance	150	150	pathways
PWY-7992	Sex	Female	SexFemale	-1.03187e-06	-5.59283e-07	3.89456e-06	0.988599	0.999827	0.988599	0.999827		abundance	150	150	pathways
PWY-8175	Recovery	Recovered	RecoveryRecovered	8.77544e-07	7.6291e-07	4.49614e-07	0.988813	0.999827	0.988813	0.999827		abundance	150	150	pathways
PWY-8174	Recovery	Recovered	RecoveryRecovered	8.77544e-07	7.6291e-07	4.49614e-07	0.988813	0.999827	0.988813	0.999827		abundance	150	150	pathways
PWY-8173	Recovery	Recovered	RecoveryRecovered	8.77544e-07	7.6291e-07	4.49614e-07	0.988814	0.999827	0.988814	0.999827		abundance	150	150	pathways
PWY490-3	Sex	Female	SexFemale	-1.13092e-07	-5.59283e-07	4.2779e-07	0.989161	0.999827	0.989161	0.999827		abundance	150	150	pathways
3-HYDROXYPHENYLACETATE-DEGRADATION-PWY	Recovery	Recovered	RecoveryRecovered	8.75415e-07	7.6291e-07	2.15367e-06	0.989369	0.999827	0.989369	0.999827		abundance	150	150	pathways
PWY-7783	Recovery	Recovered	RecoveryRecovered	6.5414e-07	7.6291e-07	4.81692e-07	0.989388	0.999827	0.989388	0.999827		abundance	150	150	pathways
PWY-7391	Recovery	Recovered	RecoveryRecovered	8.6602e-07	7.6291e-07	7.23824e-07	0.989962	0.999827	0.989962	0.999827		abundance	150	150	pathways
PWY0-321	Recovery	Recovered	RecoveryRecovered	6.60229e-07	7.6291e-07	7.02719e-07	0.990001	0.999827	0.990001	0.999827		abundance	150	150	pathways
COA-PWY-1	Recovery	Recovered	RecoveryRecovered	5.1607e-07	7.6291e-07	1.7984e-05	0.990043	0.999827	0.990043	0.999827		abundance	150	150	pathways
PWY-5692	Sex	Female	SexFemale	-1.51621e-07	-5.59283e-07	9.05972e-07	0.9901	0.999827	0.9901	0.999827		abundance	150	150	pathways
URDEGR-PWY	Sex	Female	SexFemale	-1.51621e-07	-5.59283e-07	9.05972e-07	0.9901	0.999827	0.9901	0.999827		abundance	150	150	pathways
PWY-6138	Sex	Female	SexFemale	-1.60122e-07	-5.59283e-07	1.99438e-07	0.990303	0.999827	0.990303	0.999827		abundance	150	150	pathways
PWY-6981	Sex	Female	SexFemale	-1.63451e-07	-5.59283e-07	1.38686e-07	0.990384	0.999827	0.990384	0.999827		abundance	150	150	pathways
HISDEG-PWY	Sex	Female	SexFemale	-9.58776e-07	-5.59283e-07	8.80189e-06	0.990626	0.999827	0.990626	0.999827		abundance	150	150	pathways
PWY-6318	Sex	Female	SexFemale	-1.78735e-07	-5.59283e-07	5.02632e-07	0.990756	0.999827	0.990756	0.999827		abundance	150	150	pathways
PWY0-41	Sex	Female	SexFemale	-9.31578e-07	-5.59283e-07	1.20509e-06	0.990962	0.999827	0.990962	0.999827		abundance	150	150	pathways
PWY-7317	Sex	Female	SexFemale	-1.8867e-07	-5.59283e-07	1.12826e-07	0.990997	0.999827	0.990997	0.999827		abundance	150	150	pathways
PWY0-321	Sex	Female	SexFemale	-9.13353e-07	-5.59283e-07	6.99706e-07	0.9914	0.999827	0.9914	0.999827		abundance	150	150	pathways
PWY-5156	Sex	Female	SexFemale	-2.25995e-07	-5.59283e-07	2.78229e-07	0.991903	0.999827	0.991903	0.999827		abundance	150	150	pathways
PWY3O-4107	Sex	Female	SexFemale	-8.88974e-07	-5.59283e-07	7.45119e-06	0.992189	0.999827	0.992189	0.999827		abundance	150	150	pathways
PWY-7323	Recovery	Recovered	RecoveryRecovered	8.64237e-07	7.6291e-07	6.37798e-06	0.992199	0.999827	0.992199	0.999827		abundance	150	150	pathways
SULFATE-CYS-PWY	Recovery	Recovered	RecoveryRecovered	6.31168e-07	7.6291e-07	1.11004e-05	0.992381	0.999827	0.992381	0.999827		abundance	150	150	pathways
PWY-6630	Recovery	Recovered	RecoveryRecovered	6.07177e-07	7.6291e-07	1.41864e-05	0.992418	0.999827	0.992418	0.999827		abundance	150	150	pathways
PWY-6182	Recovery	Recovered	RecoveryRecovered	8.36927e-07	7.6291e-07	1.38003e-06	0.992867	0.999827	0.992867	0.999827		abundance	150	150	pathways
SALVADEHYPOX-PWY	Recovery	Recovered	RecoveryRecovered	9.44238e-07	7.6291e-07	1.9484e-05	0.993161	0.999827	0.993161	0.999827		abundance	150	150	pathways
PWY-6562	Sex	Female	SexFemale	-8.28742e-07	-5.59283e-07	1.29066e-06	0.993459	0.999827	0.993459	0.999827		abundance	150	150	pathways
PWY-2221	Sex	Female	SexFemale	-3.18483e-07	-5.59283e-07	2.79727e-07	0.99415	0.999827	0.99415	0.999827		abundance	150	150	pathways
PWY-8173	Sex	Female	SexFemale	-3.26276e-07	-5.59283e-07	4.47686e-07	0.99434	0.999827	0.99434	0.999827		abundance	150	150	pathways
PWY-8174	Sex	Female	SexFemale	-3.26276e-07	-5.59283e-07	4.47686e-07	0.99434	0.999827	0.99434	0.999827		abundance	150	150	pathways
PWY-8175	Sex	Female	SexFemale	-3.26276e-07	-5.59283e-07	4.47686e-07	0.99434	0.999827	0.99434	0.999827		abundance	150	150	pathways
PWY-6797	Sex	Female	SexFemale	-7.91165e-07	-5.59283e-07	5.96395e-07	0.994368	0.999827	0.994368	0.999827		abundance	150	150	pathways
URSIN-PWY	Sex	Female	SexFemale	-3.27995e-07	-5.59283e-07	3.71462e-07	0.994381	0.999827	0.994381	0.999827		abundance	150	150	pathways
PWY-5920	Recovery	Recovered	RecoveryRecovered	8.39543e-07	7.6291e-07	7.39078e-06	0.99445	0.999827	0.99445	0.999827		abundance	150	150	pathways
PWY-6590	Sex	Female	SexFemale	-7.68704e-07	-5.59283e-07	3.53847e-06	0.994942	0.999827	0.994942	0.999827		abundance	150	150	pathways
PWY-5419	Sex	Female	SexFemale	-3.54731e-07	-5.59283e-07	2.69368e-07	0.995031	0.999827	0.995031	0.999827		abundance	150	150	pathways
PWY-6797	Recovery	Recovered	RecoveryRecovered	8.13666e-07	7.6291e-07	5.98964e-07	0.995053	0.999827	0.995053	0.999827		abundance	150	150	pathways
PWY-922	Sex	Female	SexFemale	-3.60099e-07	-5.59283e-07	3.68474e-06	0.995191	0.999827	0.995191	0.999827		abundance	150	150	pathways
PWY-7332	Sex	Female	SexFemale	-3.64592e-07	-5.59283e-07	1.69e-06	0.995276	0.999827	0.995276	0.999827		abundance	150	150	pathways
PWY-3841	Sex	Female	SexFemale	-7.72042e-07	-5.59283e-07	1.50693e-05	0.995303	0.999827	0.995303	0.999827		abundance	150	150	pathways
PWY-7187	Recovery	Recovered	RecoveryRecovered	8.19998e-07	7.6291e-07	5.37521e-06	0.995341	0.999827	0.995341	0.999827		abundance	150	150	pathways
PWY-5972	Sex	Female	SexFemale	-3.68342e-07	-5.59283e-07	7.03475e-07	0.995362	0.999827	0.995362	0.999827		abundance	150	150	pathways
RIBOSYN2-PWY	Sex	Female	SexFemale	-7.53825e-07	-5.59283e-07	9.09015e-06	0.995445	0.999827	0.995445	0.999827		abundance	150	150	pathways
CATECHOL-ORTHO-CLEAVAGE-PWY	Recovery	Recovered	RecoveryRecovered	7.16474e-07	7.6291e-07	1.32161e-06	0.99552	0.999827	0.99552	0.999827		abundance	150	150	pathways
PWY66-399	Recovery	Recovered	RecoveryRecovered	7.1317e-07	7.6291e-07	3.75775e-06	0.995585	0.999827	0.995585	0.999827		abundance	150	150	pathways
PWY-6151	Sex	Female	SexFemale	-3.49127e-07	-5.59283e-07	2.03313e-05	0.995661	0.999827	0.995661	0.999827		abundance	150	150	pathways
PWY-7977	Sex	Female	SexFemale	-7.5167e-07	-5.59283e-07	1.40717e-05	0.995705	0.999827	0.995705	0.999827		abundance	150	150	pathways
PWY-7269	Recovery	Recovered	RecoveryRecovered	8.08135e-07	7.6291e-07	2.26211e-06	0.99574	0.999827	0.99574	0.999827		abundance	150	150	pathways
PWY-7948	Sex	Female	SexFemale	-3.87685e-07	-5.59283e-07	6.87525e-07	0.995832	0.999827	0.995832	0.999827		abundance	150	150	pathways
GALACTITOLCAT-PWY	Recovery	Recovered	RecoveryRecovered	7.12398e-07	7.6291e-07	6.97305e-06	0.996248	0.999827	0.996248	0.999827		abundance	150	150	pathways
PWY-6920	Sex	Female	SexFemale	-4.08117e-07	-5.59283e-07	8.96595e-07	0.996329	0.999827	0.996329	0.999827		abundance	150	150	pathways
PWY66-367	Recovery	Recovered	RecoveryRecovered	7.25797e-07	7.6291e-07	7.80439e-07	0.996389	0.999827	0.996389	0.999827		abundance	150	150	pathways
PWY-7446	Recovery	Recovered	RecoveryRecovered	7.99967e-07	7.6291e-07	2.06672e-06	0.996488	0.999827	0.996488	0.999827		abundance	150	150	pathways
PWY-6478	Sex	Female	SexFemale	-7.00453e-07	-5.59283e-07	1.83268e-06	0.996576	0.999827	0.996576	0.999827		abundance	150	150	pathways
PWY-7211	Recovery	Recovered	RecoveryRecovered	7.20018e-07	7.6291e-07	6.21015e-06	0.996665	0.999827	0.996665	0.999827		abundance	150	150	pathways
PWY-7389	Sex	Female	SexFemale	-6.94612e-07	-5.59283e-07	6.42681e-07	0.996713	0.999827	0.996713	0.999827		abundance	150	150	pathways
PWY-5514	Recovery	Recovered	RecoveryRecovered	7.31661e-07	7.6291e-07	5.86502e-07	0.996954	0.999827	0.996954	0.999827		abundance	150	150	pathways
PWY-7165	Sex	Female	SexFemale	-6.84822e-07	-5.59283e-07	1.68454e-06	0.996954	0.999827	0.996954	0.999827		abundance	150	150	pathways
PWY-6628	Recovery	Recovered	RecoveryRecovered	8.37721e-07	7.6291e-07	1.88337e-05	0.997096	0.999827	0.997096	0.999827		abundance	150	150	pathways
PWY-8182	Sex	Female	SexFemale	-6.75491e-07	-5.59283e-07	1.02654e-06	0.997178	0.999827	0.997178	0.999827		abundance	150	150	pathways
PWY-6891	Sex	Female	SexFemale	-6.70578e-07	-5.59283e-07	6.60252e-07	0.997297	0.999827	0.997297	0.999827		abundance	150	150	pathways
PWY-7384	Recovery	Recovered	RecoveryRecovered	7.8973e-07	7.6291e-07	8.70792e-07	0.997393	0.999827	0.997393	0.999827		abundance	150	150	pathways
URDEGR-PWY	Recovery	Recovered	RecoveryRecovered	7.37395e-07	7.6291e-07	9.09874e-07	0.997522	0.999827	0.997522	0.999827		abundance	150	150	pathways
PWY-5692	Recovery	Recovered	RecoveryRecovered	7.37395e-07	7.6291e-07	9.09874e-07	0.997522	0.999827	0.997522	0.999827		abundance	150	150	pathways
PWY-I9	Sex	Female	SexFemale	-6.75335e-07	-5.59283e-07	2.25895e-05	0.997678	0.999827	0.997678	0.999827		abundance	150	150	pathways
PWY-6071	Recovery	Recovered	RecoveryRecovered	7.39089e-07	7.6291e-07	7.93146e-07	0.997683	0.999827	0.997683	0.999827		abundance	150	150	pathways
PWY-6385	Sex	Female	SexFemale	-6.65972e-07	-5.59283e-07	1.69714e-05	0.997698	0.999827	0.997698	0.999827		abundance	150	150	pathways
CENTFERM-PWY	Sex	Female	SexFemale	-6.43128e-07	-5.59283e-07	2.81203e-06	0.99797	0.999827	0.99797	0.999827		abundance	150	150	pathways
GLUDEG-I-PWY	Sex	Female	SexFemale	-6.06854e-07	-5.59283e-07	5.20796e-06	0.998859	0.999827	0.998859	0.999827		abundance	150	150	pathways
P562-PWY	Sex	Female	SexFemale	-5.99383e-07	-5.59283e-07	3.38061e-07	0.999026	0.999827	0.999026	0.999827		abundance	150	150	pathways
PWY-5420	Sex	Female	SexFemale	-5.20984e-07	-5.59283e-07	3.9485e-07	0.99907	0.999827	0.99907	0.999827		abundance	150	150	pathways
PWY-6467	Sex	Female	SexFemale	-5.23878e-07	-5.59283e-07	5.50665e-07	0.99914	0.999827	0.99914	0.999827		abundance	150	150	pathways
PWY-5004	Sex	Female	SexFemale	-5.24263e-07	-5.59283e-07	3.56969e-07	0.999149	0.999827	0.999149	0.999827		abundance	150	150	pathways
PWY-7312	Sex	Female	SexFemale	-5.25933e-07	-5.59283e-07	6.41711e-07	0.99919	0.999827	0.99919	0.999827		abundance	150	150	pathways
PWY-5870	Sex	Female	SexFemale	-5.76608e-07	-5.59283e-07	5.61245e-07	0.999579	0.999827	0.999579	0.999827		abundance	150	150	pathways
PWY-8182	Recovery	Recovered	RecoveryRecovered	7.5873e-07	7.6291e-07	1.03096e-06	0.999595	0.999827	0.999595	0.999827		abundance	150	150	pathways
PWY-8086	Recovery	Recovered	RecoveryRecovered	7.67091e-07	7.6291e-07	1.28224e-06	0.999596	0.999827	0.999596	0.999827		abundance	150	150	pathways
PWY-6215	Sex	Female	SexFemale	-5.73739e-07	-5.59283e-07	4.50256e-07	0.999649	0.999827	0.999649	0.999827		abundance	150	150	pathways
PWY-7616	Sex	Female	SexFemale	-5.50691e-07	-5.59283e-07	7.16097e-07	0.999791	0.999827	0.999791	0.999827		abundance	150	150	pathways
PWY-8086	Sex	Female	SexFemale	-5.66415e-07	-5.59283e-07	1.27674e-06	0.999827	0.999827	0.999827	0.999827		abundance	150	150	pathways
PWY-6113	Sex	Female	SexFemale	-5.52151e-07	-5.59283e-07	2.02459e-06	0.999827	0.999827	0.999827	0.999827		abundance	150	150	pathways
Night_sleep	Recovery	Recovered	RecoveryRecovered	-31.6636	-0.628661	13.9663	0.0454646	0.545576	0.0454646	0.545576		abundance	140	140	sleep
Night_sleep	Sex	Female	SexFemale	-12.471	-0.12801	13.9534	0.383505	0.969575	0.383505	0.969575		abundance	140	140	sleep
Fall_asleep_time	Sex	Female	SexFemale	2.14642	-0.12801	2.52849	0.531764	0.969575	0.531764	0.969575		abundance	140	140	sleep
Day_sleep	Sex	Female	SexFemale	-5.26101	-0.12801	8.36652	0.55575	0.969575	0.55575	0.969575		abundance	140	140	sleep
Fall_asleep_time	Recovery	Recovered	RecoveryRecovered	-2.17032	-0.628661	2.53083	0.820936	0.969575	0.820936	0.969575		abundance	140	140	sleep
Bedtime_difficulty	Recovery	Recovered	RecoveryRecovered	0.0561798	-0.628661	0.138091	0.916149	0.969575	0.916149	0.969575		abundance	140	140	sleep
Times_woken_up	Recovery	Recovered	RecoveryRecovered	0.0432317	-0.628661	0.153267	0.91773	0.969575	0.91773	0.969575		abundance	140	140	sleep
Sleep_problematic	Recovery	Recovered	RecoveryRecovered	0.0304976	-0.628661	0.028495	0.919272	0.969575	0.919272	0.969575		abundance	140	140	sleep
Day_sleep	Recovery	Recovered	RecoveryRecovered	-1.28782	-0.628661	8.37424	0.948509	0.969575	0.948509	0.969575		abundance	140	140	sleep
Bedtime_difficulty	Sex	Female	SexFemale	0.0468165	-0.12801	0.137963	0.94975	0.969575	0.94975	0.969575		abundance	140	140	sleep
Sleep_problematic	Sex	Female	SexFemale	-0.0222044	-0.12801	0.0284687	0.96956	0.969575	0.96956	0.969575		abundance	140	140	sleep
Times_woken_up	Sex	Female	SexFemale	-0.233815	-0.12801	0.153126	0.969575	0.969575	0.969575	0.969575		abundance	140	140	sleep
Acetobacter_indonesiensis|SGB1203	Recovery	Recovered	RecoveryRecovered	-2.36924	0.25825	1.68675	0.260588	0.997187	0.336409	0.997474		abundance	150	5	species
Acetobacter_indonesiensis|SGB1203	Sex	Female	SexFemale	2.75747	0.200277	1.68675	0.269868	0.997187	0.466907	0.997474		abundance	150	5	species
Acidaminococcus_intestini|SGB5736	Recovery	Recovered	RecoveryRecovered	-1.63919	0.25825	2.38283	0.4489	0.997187	0.696289	0.997474		abundance	150	11	species
Acidaminococcus_intestini|SGB5736	Sex	Female	SexFemale	-2.47514	0.200277	2.57375	0.329013	0.997187	0.211132	0.997474		abundance	150	11	species
Acidaminococcus_massiliensis|SGB5742	Recovery	Recovered	RecoveryRecovered	-0.517746	0.25825	3.55933	0.834545	0.997187	0.143581	0.997474		abundance	150	9	species
Acidaminococcus_massiliensis|SGB5742	Sex	Female	SexFemale	4.29336	0.200277	2.25112	0.119158	0.997187	0.224118	0.997474		abundance	150	9	species
Acinetobacter_baumannii|SGB10343	Recovery	Recovered	RecoveryRecovered	2.90373	0.25825	1.53639	0.105238	0.997187	0.1994	0.997474		abundance	150	19	species
Acinetobacter_baumannii|SGB10343	Sex	Female	SexFemale	1.18648	0.200277	1.53639	0.530764	0.997187	0.779818	0.997474		abundance	150	19	species
Actinomyces_graevenitzii|SGB17130_group	Recovery	Recovered	RecoveryRecovered	-0.553736	0.25825	1.40408	0.573837	0.997187	0.244317	0.997474		abundance	150	16	species
Actinomyces_graevenitzii|SGB17130_group	Sex	Female	SexFemale	1.44206	0.200277	1.37025	0.382071	0.997187	0.618163	0.997474		abundance	150	16	species
Actinomyces_naeslundii|SGB15888	Recovery	Recovered	RecoveryRecovered	1.09608	0.25825	1.57567	0.614219	0.997187	0.777633	0.997474		abundance	150	9	species
Actinomyces_naeslundii|SGB15888	Sex	Female	SexFemale	-1.2649	0.200277	1.57567	0.389007	0.997187	0.626688	0.997474		abundance	150	9	species
Actinomyces_oris|SGB15878	Recovery	Recovered	RecoveryRecovered	1.79585	0.25825	0.933645	0.15454	0.997187	0.285197	0.997474		abundance	150	9	species
Actinomyces_oris|SGB15878	Sex	Female	SexFemale	-1.58426	0.200277	0.933645	0.10747	0.997187	0.203391	0.997474		abundance	150	9	species
Actinomyces_sp_HMSC035G02|SGB17158_group	Recovery	Recovered	RecoveryRecovered	-0.247747	0.25825	1.14885	0.703389	0.997187	0.706895	0.997474		abundance	150	5	species
Actinomyces_sp_HMSC035G02|SGB17158_group	Sex	Female	SexFemale	-1.05541	0.200277	1.40705	0.466454	0.997187	0.330173	0.997474		abundance	150	5	species
Aeromonas_caviae|SGB9955	Recovery	Recovered	RecoveryRecovered	0.306852	0.25825	2.31523	0.983556	0.997187	0.0628246	0.997474		abundance	150	17	species
Aeromonas_caviae|SGB9955	Sex	Female	SexFemale	0.35227	0.200277	2.1135	0.943691	0.997187	0.987313	0.997474		abundance	150	17	species
Agathobaculum_butyriciproducens|SGB14993	Recovery	Recovered	RecoveryRecovered	-0.374723	0.25825	0.593039	0.30373	0.997187	0.515208	0.997474		abundance	150	49	species
Agathobaculum_butyriciproducens|SGB14993	Sex	Female	SexFemale	0.801501	0.200277	0.578023	0.31366	0.997187	0.528937	0.997474		abundance	150	49	species
Aggregatibacter_segnis|SGB9737_group	Recovery	Recovered	RecoveryRecovered	2.17645	0.25825	2.14146	0.465155	0.997187	0.520651	0.997474		abundance	150	5	species
Aggregatibacter_segnis|SGB9737_group	Sex	Female	SexFemale	-0.264604	0.200277	1.74849	0.815199	0.997187	0.911709	0.997474		abundance	150	5	species
Akkermansia_muciniphila|SGB9226	Recovery	Recovered	RecoveryRecovered	-2.76486	0.25825	3.67464	0.437671	0.997187	0.683787	0.997474		abundance	150	10	species
Akkermansia_muciniphila|SGB9226	Sex	Female	SexFemale	1.22085	0.200277	3.67464	0.789157	0.997187	0.688706	0.997474		abundance	150	10	species
Akkermansia_muciniphila|SGB9228	Recovery	Recovered	RecoveryRecovered	-2.17865	0.25825	2.8361	0.412519	0.997187	0.654866	0.997474		abundance	150	12	species
Akkermansia_muciniphila|SGB9228	Sex	Female	SexFemale	-3.65304	0.200277	2.71183	0.18921	0.997187	0.34262	0.997474		abundance	150	12	species
Alistipes_indistinctus|SGB2325	Recovery	Recovered	RecoveryRecovered	-0.919548	0.25825	1.67478	0.496956	0.997187	0.529521	0.997474		abundance	150	14	species
[truncated: 2,229 more rows]

## Sheet: S3
feature	metadata	value	name	coef	null_hypothesis	stderr	pval_individual	qval_individual	pval_joint	qval_joint	error	model	N	N_not_zero	filename
glutamine	timepoint	yr2	timepointyr2	-76.6535	-0.03784	17.8878	6.26e-05	0.007198	6.26e-05	0.007198		abundance	406	406	aa
trytophan	Feed	ERUSF (B)	FeedERUSF (B)	13.809	0.874742	2.83363	0.000571	0.032848	0.000571	0.032848		abundance	406	406	aa
trytophan	Feed	Local RUSF (A)	FeedLocal RUSF (A)	12.7318	1.52114	2.81427	0.002376	0.07014	0.002376	0.07014		abundance	406	406	aa
glutamic_acid	timepoint	yr2	timepointyr2	-18.2452	-0.03784	2.20093	0.002917	0.07014	0.002917	0.07014		abundance	406	406	aa
lysine	timepoint	yr2:FeedERUSF (B)	timepointyr2:FeedERUSF (B)	30.2576	0.410546	9.41922	0.003458	0.07014	0.003458	0.07014		abundance	406	406	aa
glutamic_acid	timepoint	yr2:FeedERUSF (B)	timepointyr2:FeedERUSF (B)	14.3901	0.410546	3.11048	0.003718	0.07014	0.003718	0.07014		abundance	406	406	aa
glutamic_acid	Feed	ERUSF (B)	FeedERUSF (B)	-8.88824	0.874742	2.36019	0.004269	0.07014	0.004269	0.07014		abundance	406	406	aa
glutamic_acid	Feed	Local RUSF (A)	FeedLocal RUSF (A)	-7.81506	1.52114	2.34257	0.005045	0.072529	0.005045	0.072529		abundance	406	406	aa
glutamine	timepoint	yr2:FeedLocal RUSF (A)	timepointyr2:FeedLocal RUSF (A)	71.6668	0.581558	25.1353	0.006501	0.083073	0.006501	0.083073		abundance	406	406	aa
lysine	timepoint	yr2:FeedLocal RUSF (A)	timepointyr2:FeedLocal RUSF (A)	29.8482	0.581558	9.37103	0.009231	0.106161	0.009231	0.106161		abundance	406	406	aa
alanine	timepoint	yr2:FeedLocal RUSF (A)	timepointyr2:FeedLocal RUSF (A)	-63.8494	0.581558	24.5273	0.011441	0.11219	0.011441	0.11219		abundance	406	406	aa
trytophan	timepoint	yr2:FeedLocal RUSF (A)	timepointyr2:FeedLocal RUSF (A)	-16.931	0.581558	3.44862	0.012535	0.11219	0.012535	0.11219		abundance	406	406	aa
ornithine	Feed	Local RUSF (A)	FeedLocal RUSF (A)	-8.44563	1.52114	3.22359	0.012682	0.11219	0.012682	0.11219		abundance	406	406	aa
serine	Feed	Local RUSF (A)	FeedLocal RUSF (A)	-11.5779	1.52114	5.02116	0.018319	0.150475	0.018319	0.150475		abundance	406	406	aa
valine	timepoint	yr2	timepointyr2	20.8253	-0.03784	7.19043	0.023357	0.167091	0.023357	0.167091		abundance	406	406	aa
glycine	timepoint	yr2	timepointyr2	23.9275	-0.03784	8.90625	0.023845	0.167091	0.023845	0.167091		abundance	406	406	aa
trytophan	timepoint	yr2:FeedERUSF (B)	timepointyr2:FeedERUSF (B)	-10.8873	0.410546	3.46895	0.025362	0.167091	0.025362	0.167091		abundance	406	406	aa
lysine	Feed	ERUSF (B)	FeedERUSF (B)	-15.9517	0.874742	7.21323	0.027399	0.167091	0.027399	0.167091		abundance	406	406	aa
ornithine	timepoint	yr2	timepointyr2	-13.9738	-0.03784	2.84855	0.028574	0.167091	0.028574	0.167091		abundance	406	406	aa
ornithine	Feed	ERUSF (B)	FeedERUSF (B)	-8.0036	0.874742	3.24613	0.029059	0.167091	0.029059	0.167091		abundance	406	406	aa
ornithine	timepoint	yr2:FeedERUSF (B)	timepointyr2:FeedERUSF (B)	11.8878	0.410546	4.01995	0.034717	0.189274	0.034717	0.189274		abundance	406	406	aa
valine	timepoint	yr2:FeedLocal RUSF (A)	timepointyr2:FeedLocal RUSF (A)	-24.1577	0.581558	10.0818	0.036209	0.189274	0.036209	0.189274		abundance	406	406	aa
lysine	timepoint	yr2	timepointyr2	-18.1747	-0.03784	6.66642	0.038975	0.194874	0.038975	0.194874		abundance	406	406	aa
lysine	Feed	Local RUSF (A)	FeedLocal RUSF (A)	-13.0843	1.52114	7.15986	0.051899	0.248682	0.051899	0.248682		abundance	406	406	aa
serine	Feed	ERUSF (B)	FeedERUSF (B)	-9.35997	0.874742	5.05688	0.067112	0.308713	0.067112	0.308713		abundance	406	406	aa
alanine	timepoint	yr2	timepointyr2	31.4288	-0.03784	17.4312	0.08629	0.366396	0.08629	0.366396		abundance	406	406	aa
glutamic_acid	timepoint	yr2:FeedLocal RUSF (A)	timepointyr2:FeedLocal RUSF (A)	12.1261	0.581558	3.09492	0.090475	0.366396	0.090475	0.366396		abundance	406	406	aa
trytophan	timepoint	yr2	timepointyr2	10.3355	-0.03784	2.45871	0.093119	0.366396	0.093119	0.366396		abundance	406	406	aa
histidine	Feed	ERUSF (B)	FeedERUSF (B)	6.61662	0.874742	2.46842	0.09591	0.366396	0.09591	0.366396		abundance	406	406	aa
phenylalanine	timepoint	yr2:FeedERUSF (B)	timepointyr2:FeedERUSF (B)	-9.40489	0.410546	4.66871	0.097093	0.366396	0.097093	0.366396		abundance	406	406	aa
phenylalanine	timepoint	yr2:FeedLocal RUSF (A)	timepointyr2:FeedLocal RUSF (A)	-12.0421	0.581558	4.63754	0.098768	0.366396	0.098768	0.366396		abundance	406	406	aa
taurine	Feed	ERUSF (B)	FeedERUSF (B)	8.08178	0.874742	3.78085	0.105932	0.380691	0.105932	0.380691		abundance	406	406	aa
threonine	Feed	ERUSF (B)	FeedERUSF (B)	-8.38136	0.874742	5.30656	0.110299	0.384375	0.110299	0.384375		abundance	406	406	aa
ornithine	timepoint	yr2:FeedLocal RUSF (A)	timepointyr2:FeedLocal RUSF (A)	11.7576	0.581558	3.99689	0.124089	0.413784	0.124089	0.413784		abundance	406	406	aa
glutamine	Feed	Local RUSF (A)	FeedLocal RUSF (A)	-28.219	1.52114	19.4139	0.127606	0.413784	0.127606	0.413784		abundance	406	406	aa
serine	timepoint	yr2	timepointyr2	-10.9887	-0.03784	4.4923	0.129532	0.413784	0.129532	0.413784		abundance	406	406	aa
valine	timepoint	yr2:FeedERUSF (B)	timepointyr2:FeedERUSF (B)	-15.5615	0.410546	10.1425	0.137143	0.418403	0.137143	0.418403		abundance	406	406	aa
proline	timepoint	yr2	timepointyr2	-19.0202	-0.03784	11.5325	0.138255	0.418403	0.138255	0.418403		abundance	406	406	aa
taurine	Feed	Local RUSF (A)	FeedLocal RUSF (A)	7.47548	1.52114	3.75204	0.174868	0.515637	0.174868	0.515637		abundance	406	406	aa
alanine	timepoint	yr2:FeedERUSF (B)	timepointyr2:FeedERUSF (B)	-32.8623	0.410546	24.6452	0.180809	0.519825	0.180809	0.519825		abundance	406	406	aa
tyrosine	Feed	ERUSF (B)	FeedERUSF (B)	7.40945	0.874742	4.42033	0.188334	0.528254	0.188334	0.528254		abundance	406	406	aa
glutamine	timepoint	yr2:FeedERUSF (B)	timepointyr2:FeedERUSF (B)	32.259	0.410546	25.2679	0.211146	0.57569	0.211146	0.57569		abundance	406	406	aa
arginine	Feed	ERUSF (B)	FeedERUSF (B)	6.1484	0.874742	3.58096	0.215258	0.57569	0.215258	0.57569		abundance	406	406	aa
phenylalanine	Feed	Local RUSF (A)	FeedLocal RUSF (A)	7.19734	1.52114	4.12247	0.225889	0.588985	0.225889	0.588985		abundance	406	406	aa
threonine	Feed	Local RUSF (A)	FeedLocal RUSF (A)	-5.26606	1.52114	5.26877	0.230472	0.588985	0.230472	0.588985		abundance	406	406	aa
threonine	timepoint	yr2	timepointyr2	-8.15035	-0.03784	4.74295	0.269025	0.627072	0.269025	0.627072		abundance	406	406	aa
glycine	timepoint	yr2:FeedERUSF (B)	timepointyr2:FeedERUSF (B)	-13.8839	0.410546	12.5888	0.270789	0.627072	0.270789	0.627072		abundance	406	406	aa
proline	Feed	ERUSF (B)	FeedERUSF (B)	-13.8163	0.874742	13.3357	0.273153	0.627072	0.273153	0.627072		abundance	406	406	aa
aspartic_acid	Feed	Local RUSF (A)	FeedLocal RUSF (A)	-1.06339	1.52114	0.361436	0.273741	0.627072	0.273741	0.627072		abundance	406	406	aa
asparagine	Feed	Local RUSF (A)	FeedLocal RUSF (A)	-1.81172	1.52114	2.07554	0.274731	0.627072	0.274731	0.627072		abundance	406	406	aa
phenylalanine	timepoint	yr2	timepointyr2	7.02589	-0.03784	3.3143	0.280683	0.627072	0.280683	0.627072		abundance	406	406	aa
glutamine	Feed	ERUSF (B)	FeedERUSF (B)	21.7508	0.874742	19.557	0.285609	0.627072	0.285609	0.627072		abundance	406	406	aa
threonine	timepoint	yr2:FeedERUSF (B)	timepointyr2:FeedERUSF (B)	8.36291	0.410546	6.69612	0.288998	0.627072	0.288998	0.627072		abundance	406	406	aa
aspartic_acid	Feed	ERUSF (B)	FeedERUSF (B)	-1.59229	0.874742	0.364241	0.314307	0.669357	0.314307	0.669357		abundance	406	406	aa
phenylalanine	Feed	ERUSF (B)	FeedERUSF (B)	5.49057	0.874742	4.14703	0.324837	0.679206	0.324837	0.679206		abundance	406	406	aa
citrulline	timepoint	yr2	timepointyr2	4.98344	-0.03784	1.02937	0.381741	0.783933	0.381741	0.783933		abundance	406	406	aa
valine	Feed	Local RUSF (A)	FeedLocal RUSF (A)	8.78251	1.52114	8.32428	0.393152	0.7932	0.393152	0.7932		abundance	406	406	aa
proline	timepoint	yr2:FeedLocal RUSF (A)	timepointyr2:FeedLocal RUSF (A)	14.5702	0.581558	16.1738	0.414487	0.812045	0.414487	0.812045		abundance	406	406	aa
taurine	timepoint	yr2	timepointyr2	5.36107	-0.03784	3.61427	0.416614	0.812045	0.416614	0.812045		abundance	406	406	aa
hydroxyproline	timepoint	yr2:FeedERUSF (B)	timepointyr2:FeedERUSF (B)	3.77836	0.410546	2.34488	0.427925	0.819827	0.427925	0.819827		abundance	406	406	aa
glycine	Feed	ERUSF (B)	FeedERUSF (B)	8.34238	0.874742	9.49153	0.434865	0.819827	0.434865	0.819827		abundance	406	406	aa
alanine	Feed	ERUSF (B)	FeedERUSF (B)	-12.6948	0.874742	18.3899	0.458811	0.85102	0.458811	0.85102		abundance	406	406	aa
arginine	timepoint	yr2:FeedLocal RUSF (A)	timepointyr2:FeedLocal RUSF (A)	5.82002	0.581558	4.70536	0.489266	0.893105	0.489266	0.893105		abundance	406	406	aa
histidine	timepoint	yr2:FeedERUSF (B)	timepointyr2:FeedERUSF (B)	-2.66058	0.410546	3.1203	0.508348	0.909774	0.508348	0.909774		abundance	406	406	aa
citrulline	timepoint	yr2:FeedERUSF (B)	timepointyr2:FeedERUSF (B)	-2.10367	0.410546	1.44983	0.515439	0.909774	0.515439	0.909774		abundance	406	406	aa
leucine	timepoint	yr2:FeedLocal RUSF (A)	timepointyr2:FeedLocal RUSF (A)	-5.00224	0.581558	6.67387	0.528313	0.909774	0.528313	0.909774		abundance	406	406	aa
arginine	timepoint	yr2	timepointyr2	3.99967	-0.03784	3.34593	0.534218	0.909774	0.534218	0.909774		abundance	406	406	aa
taurine	timepoint	yr2:FeedLocal RUSF (A)	timepointyr2:FeedLocal RUSF (A)	-4.2199	0.581558	5.08736	0.537953	0.909774	0.537953	0.909774		abundance	406	406	aa
citrulline	Feed	ERUSF (B)	FeedERUSF (B)	2.48441	0.874742	1.29808	0.550238	0.916406	0.550238	0.916406		abundance	406	406	aa
proline	Feed	Local RUSF (A)	FeedLocal RUSF (A)	9.2277	1.52114	13.2451	0.561282	0.916406	0.561282	0.916406		abundance	406	406	aa
threonine	timepoint	yr2:FeedLocal RUSF (A)	timepointyr2:FeedLocal RUSF (A)	5.67977	0.581558	6.65912	0.565781	0.916406	0.565781	0.916406		abundance	406	406	aa
asparagine	Feed	ERUSF (B)	FeedERUSF (B)	-0.79115	0.874742	2.09171	0.585569	0.935284	0.585569	0.935284		abundance	406	406	aa
tyrosine	timepoint	yr2:FeedERUSF (B)	timepointyr2:FeedERUSF (B)	3.58008	0.410546	5.03159	0.597274	0.94091	0.597274	0.94091		abundance	406	406	aa
proline	timepoint	yr2:FeedERUSF (B)	timepointyr2:FeedERUSF (B)	-7.97902	0.410546	16.2698	0.610147	0.948202	0.610147	0.948202		abundance	406	406	aa
citrulline	timepoint	yr2:FeedLocal RUSF (A)	timepointyr2:FeedLocal RUSF (A)	-2.42609	0.581558	1.44006	0.627649	0.954163	0.627649	0.954163		abundance	406	406	aa
hydroxyproline	timepoint	yr2	timepointyr2	-2.8567	-0.03784	1.65755	0.630577	0.954163	0.630577	0.954163		abundance	406	406	aa
hydroxyproline	Feed	ERUSF (B)	FeedERUSF (B)	-0.40929	0.874742	1.71269	0.649563	0.970127	0.649563	0.970127		abundance	406	406	aa
tyrosine	timepoint	yr2:FeedLocal RUSF (A)	timepointyr2:FeedLocal RUSF (A)	3.80064	0.581558	4.99849	0.676407	0.997267	0.676407	0.997267		abundance	406	406	aa
isoleucine	timepoint	yr2:FeedLocal RUSF (A)	timepointyr2:FeedLocal RUSF (A)	-2.36262	0.581558	4.28031	0.685604	0.997793	0.685604	0.997793		abundance	406	406	aa
glycine	Feed	Local RUSF (A)	FeedLocal RUSF (A)	5.25668	1.52114	9.42026	0.694117	0.997793	0.694117	0.997793		abundance	406	406	aa
taurine	timepoint	yr2:FeedERUSF (B)	timepointyr2:FeedERUSF (B)	2.6777	0.410546	5.11123	0.707693	0.999035	0.707693	0.999035		abundance	406	406	aa
asparagine	timepoint	yr2:FeedERUSF (B)	timepointyr2:FeedERUSF (B)	-1.24185	0.410546	2.89884	0.712356	0.999035	0.712356	0.999035		abundance	406	406	aa
methionine	Feed	Local RUSF (A)	FeedLocal RUSF (A)	0.66717	1.52114	1.20338	0.736731	1	0.736731	1		abundance	406	406	aa
hydroxyproline	Feed	Local RUSF (A)	FeedLocal RUSF (A)	0.602305	1.52114	1.69953	0.737617	1	0.737617	1		abundance	406	406	aa
asparagine	timepoint	yr2:FeedLocal RUSF (A)	timepointyr2:FeedLocal RUSF (A)	-1.52489	0.581558	2.8863	0.749927	1	0.749927	1		abundance	406	406	aa
methionine	timepoint	yr2:FeedERUSF (B)	timepointyr2:FeedERUSF (B)	1.55439	0.410546	1.62684	0.768136	1	0.768136	1		abundance	406	406	aa
valine	Feed	ERUSF (B)	FeedERUSF (B)	3.24877	0.874742	8.38058	0.778596	1	0.778596	1		abundance	406	406	aa
aspartic_acid	timepoint	yr2	timepointyr2	-1.5948	-0.03784	0.353803	0.782899	1	0.782899	1		abundance	406	406	aa
aspartic_acid	timepoint	yr2:FeedERUSF (B)	timepointyr2:FeedERUSF (B)	1.35854	0.410546	0.500565	0.794353	1	0.794353	1		abundance	406	406	aa
leucine	Feed	Local RUSF (A)	FeedLocal RUSF (A)	2.84861	1.52114	4.98982	0.802429	1	0.802429	1		abundance	406	406	aa
hydroxyproline	timepoint	yr2:FeedLocal RUSF (A)	timepointyr2:FeedLocal RUSF (A)	2.0214	0.581558	2.33433	0.822165	1	0.822165	1		abundance	406	406	aa
histidine	Feed	Local RUSF (A)	FeedLocal RUSF (A)	2.09606	1.52114	2.4508	0.858247	1	0.858247	1		abundance	406	406	aa
leucine	timepoint	yr2	timepointyr2	-1.28452	-0.03784	4.7439	0.861654	1	0.861654	1		abundance	406	406	aa
serine	timepoint	yr2:FeedLocal RUSF (A)	timepointyr2:FeedLocal RUSF (A)	2.05343	0.581558	6.30589	0.863538	1	0.863538	1		abundance	406	406	aa
citrulline	Feed	Local RUSF (A)	FeedLocal RUSF (A)	1.96653	1.52114	1.29052	0.864286	1	0.864286	1		abundance	406	406	aa
histidine	timepoint	yr2:FeedLocal RUSF (A)	timepointyr2:FeedLocal RUSF (A)	-0.49258	0.581558	3.10313	0.871919	1	0.871919	1		abundance	406	406	aa
arginine	timepoint	yr2:FeedERUSF (B)	timepointyr2:FeedERUSF (B)	-0.49498	0.410546	4.72889	0.873783	1	0.873783	1		abundance	406	406	aa
asparagine	timepoint	yr2	timepointyr2	0.891066	-0.03784	2.04844	0.875006	1	0.875006	1		abundance	406	406	aa
tyrosine	Feed	Local RUSF (A)	FeedLocal RUSF (A)	0.927027	1.52114	4.3936	0.900155	1	0.900155	1		abundance	406	406	aa
serine	timepoint	yr2:FeedERUSF (B)	timepointyr2:FeedERUSF (B)	-0.46097	0.410546	6.34137	0.901533	1	0.901533	1		abundance	406	406	aa
leucine	Feed	ERUSF (B)	FeedERUSF (B)	1.38491	0.874742	5.02775	0.923001	1	0.923001	1		abundance	406	406	aa
alanine	Feed	Local RUSF (A)	FeedLocal RUSF (A)	3.25878	1.52114	18.2507	0.923774	1	0.923774	1		abundance	406	406	aa
methionine	timepoint	yr2	timepointyr2	0.48756	-0.03784	1.15061	0.926659	1	0.926659	1		abundance	406	406	aa
isoleucine	Feed	ERUSF (B)	FeedERUSF (B)	0.603424	0.874742	3.20291	0.942358	1	0.942358	1		abundance	406	406	aa
arginine	Feed	Local RUSF (A)	FeedLocal RUSF (A)	1.81216	1.52114	3.55418	0.942479	1	0.942479	1		abundance	406	406	aa
leucine	timepoint	yr2:FeedERUSF (B)	timepointyr2:FeedERUSF (B)	0.66202	0.410546	6.70638	0.972597	1	0.972597	1		abundance	406	406	aa
histidine	timepoint	yr2	timepointyr2	0.142576	-0.03784	2.21006	0.975752	1	0.975752	1		abundance	406	406	aa
isoleucine	timepoint	yr2	timepointyr2	-0.21826	-0.03784	3.04172	0.976935	1	0.976935	1		abundance	406	406	aa
glycine	timepoint	yr2:FeedLocal RUSF (A)	timepointyr2:FeedLocal RUSF (A)	0.863642	0.581558	12.5269	0.98356	1	0.98356	1		abundance	406	406	aa
aspartic_acid	timepoint	yr2:FeedLocal RUSF (A)	timepointyr2:FeedLocal RUSF (A)	0.468334	0.581558	0.498339	0.985074	1	0.985074	1		abundance	406	406	aa
tyrosine	timepoint	yr2	timepointyr2	-0.07123	-0.03784	3.57123	0.996011	1	0.996011	1		abundance	406	406	aa
methionine	Feed	ERUSF (B)	FeedERUSF (B)	0.874742	0.874742	1.21257	1	1	1	1		abundance	406	406	aa
isoleucine	Feed	Local RUSF (A)	FeedLocal RUSF (A)	1.52114	1.52114	3.17862	1	1	1	1		abundance	406	406	aa
isoleucine	timepoint	yr2:FeedERUSF (B)	timepointyr2:FeedERUSF (B)	0.410546	0.410546	4.30078	1	1	1	1		abundance	406	406	aa
methionine	timepoint	yr2:FeedLocal RUSF (A)	timepointyr2:FeedLocal RUSF (A)	0.581558	0.581558	1.61908	1	1	1	1		abundance	406	406	aa
Richness	timepoint	yr2	timepointyr2	59.8167	0.562023	6.62939	0.021798	0.305166	0.021798	0.305166		abundance	438	438	alpha_diversity
Faiths_PD	timepoint	yr2:FeedLocal RUSF (A)	timepointyr2:FeedLocal RUSF (A)	-0.00551	8.56306	0.204312	0.421241	1	0.421241	1		abundance	438	438	alpha_diversity
Richness	timepoint	yr2:FeedLocal RUSF (A)	timepointyr2:FeedLocal RUSF (A)	17.0455	8.56306	9.19173	0.425355	1	0.425355	1		abundance	438	438	alpha_diversity
Shannon	timepoint	yr2:FeedLocal RUSF (A)	timepointyr2:FeedLocal RUSF (A)	0.080624	8.56306	0.119814	0.425789	1	0.425789	1		abundance	438	438	alpha_diversity
Richness	Feed	Local RUSF (A)	FeedLocal RUSF (A)	-1.49911	-0.01561	6.9503	0.830406	1	0.830406	1		abundance	438	438	alpha_diversity
Faiths_PD	Feed	Local RUSF (A)	FeedLocal RUSF (A)	0.039289	-0.01561	0.149143	0.930875	1	0.930875	1		abundance	438	438	alpha_diversity
Richness	timepoint	yr2:FeedERUSF (B)	timepointyr2:FeedERUSF (B)	0.768003	-0.0218	9.20525	0.931194	1	0.931194	1		abundance	438	438	alpha_diversity
Faiths_PD	Feed	ERUSF (B)	FeedERUSF (B)	-0.06481	-0.06352	0.149149	0.957049	1	0.957049	1		abundance	438	438	alpha_diversity
Faiths_PD	timepoint	yr2:FeedERUSF (B)	timepointyr2:FeedERUSF (B)	-0.0315	-0.0218	0.204633	0.976833	1	0.976833	1		abundance	438	438	alpha_diversity
Richness	Feed	ERUSF (B)	FeedERUSF (B)	0.137561	-0.06352	6.951	0.976933	1	0.976933	1		abundance	438	438	alpha_diversity
Faiths_PD	timepoint	yr2	timepointyr2	0.424778	0.562023	0.147333	0.995587	1	0.995587	1		abundance	438	438	alpha_diversity
Shannon	timepoint	yr2	timepointyr2	0.562023	0.562023	0.086407	1	1	1	1		abundance	438	438	alpha_diversity
Shannon	Feed	Local RUSF (A)	FeedLocal RUSF (A)	-0.01561	-0.01561	0.088914	1	1	1	1		abundance	438	438	alpha_diversity
Shannon	timepoint	yr2:FeedERUSF (B)	timepointyr2:FeedERUSF (B)	-0.0218	-0.0218	0.119997	1	1	1	1		abundance	438	438	alpha_diversity
Length	timepoint	yr2	timepointyr2	9.683	1.6707	0.198346	0.000422	0.009291	0.000422	0.009291		abundance	468	437	anthro
WLZ_WHZ	Feed	ERUSF (B)	FeedERUSF (B)	0.073896	-1.81602	0.554149	0.022842	0.251264	0.022842	0.251264		abundance	468	35	anthro
HC	Feed	Local RUSF (A)	FeedLocal RUSF (A)	-0.99705	-1.81783	0.244017	0.043753	0.320854	0.043753	0.320854		abundance	468	327	anthro
MUAC	timepoint	yr2:FeedERUSF (B)	timepointyr2:FeedERUSF (B)	0.644684	0.102041	0.105992	0.061808	0.339941	0.061808	0.339941		abundance	468	437	anthro
HC	Feed	ERUSF (B)	FeedERUSF (B)	-0.97792	-1.81602	0.243274	0.16809	0.70469	0.16809	0.70469		abundance	468	327	anthro
MUAC	timepoint	yr2:FeedLocal RUSF (A)	timepointyr2:FeedLocal RUSF (A)	0.667557	0.363074	0.106337	0.210214	0.70469	0.210214	0.70469		abundance	468	437	anthro
Length	timepoint	yr2:FeedLocal RUSF (A)	timepointyr2:FeedLocal RUSF (A)	-0.00126	0.363074	0.272729	0.297432	0.70469	0.297432	0.70469		abundance	468	437	anthro
Weight	timepoint	yr2:FeedERUSF (B)	timepointyr2:FeedERUSF (B)	0.382944	0.102041	0.103132	0.299057	0.70469	0.299057	0.70469		abundance	468	437	anthro
Length	Feed	ERUSF (B)	FeedERUSF (B)	-2.50908	-1.81602	0.415833	0.311743	0.70469	0.311743	0.70469		abundance	468	437	anthro
HC	timepoint	yr2:FeedERUSF (B)	timepointyr2:FeedERUSF (B)	-0.23784	0.102041	0.354992	0.368706	0.70469	0.368706	0.70469		abundance	468	327	anthro
Length	timepoint	yr2:FeedERUSF (B)	timepointyr2:FeedERUSF (B)	-0.17886	0.102041	0.271831	0.391789	0.70469	0.391789	0.70469		abundance	468	437	anthro
HC	timepoint	yr2:FeedLocal RUSF (A)	timepointyr2:FeedLocal RUSF (A)	0.058387	0.363074	0.357555	0.412231	0.70469	0.412231	0.70469		abundance	468	327	anthro
Length	Feed	Local RUSF (A)	FeedLocal RUSF (A)	-2.21647	-1.81783	0.417104	0.416408	0.70469	0.416408	0.70469		abundance	468	437	anthro
WLZ_WHZ	timepoint	yr2	timepointyr2	-0.04309	1.6707	0.146953	0.460939	0.724333	0.460939	0.724333		abundance	468	35	anthro
MUAC	timepoint	yr2	timepointyr2	0.419061	1.6707	0.077122	0.57475	0.842967	0.57475	0.842967		abundance	468	437	anthro
Weight	Feed	Local RUSF (A)	FeedLocal RUSF (A)	-1.74014	-1.81783	0.115583	0.810604	1	0.810604	1		abundance	468	437	anthro
MUAC	Feed	Local RUSF (A)	FeedLocal RUSF (A)	-1.89551	-1.81783	0.09497	0.812009	1	0.812009	1		abundance	468	437	anthro
HC	timepoint	yr2	timepointyr2	1.95212	1.6707	0.255034	0.900038	1	0.900038	1		abundance	468	327	anthro
MUAC	Feed	ERUSF (B)	FeedERUSF (B)	-1.82133	-1.81602	0.09468	0.992379	1	0.992379	1		abundance	468	437	anthro
Weight	timepoint	yr2	timepointyr2	1.6707	1.6707	0.07516	1	1	1	1		abundance	468	437	anthro
Weight	Feed	ERUSF (B)	FeedERUSF (B)	-1.81602	-1.81602	0.115231	1	1	1	1		abundance	468	437	anthro
Weight	timepoint	yr2:FeedLocal RUSF (A)	timepointyr2:FeedLocal RUSF (A)	0.363074	0.363074	0.103471	1	1	1	1		abundance	468	437	anthro
ear_to_ear_measurement_front_cm	timepoint	yr2	timepointyr2	0.393543	1.185	0.162421	0.013035	0.325874	0.013035	0.325874		abundance	429	429	head
nasion_to_inion_measurement_cm	Feed	Local RUSF (A)	FeedLocal RUSF (A)	0.251136	-0.69183	0.297841	0.029898	0.373727	0.029898	0.373727		abundance	429	429	head
head_circumference_cm	Feed	ERUSF (B)	FeedERUSF (B)	-1.26477	-0.67451	0.207072	0.083643	0.497868	0.083643	0.497868		abundance	429	429	head
head_circumference_cm	timepoint	yr2	timepointyr2	1.65051	1.185	0.097612	0.106715	0.497868	0.106715	0.497868		abundance	429	429	head
ear_to_ear_measurement_top_head_cm	Feed	ERUSF (B)	FeedERUSF (B)	-1.22504	-0.67451	0.257924	0.135311	0.497868	0.135311	0.497868		abundance	429	429	head
nasion_to_inion_measurement_cm	Feed	ERUSF (B)	FeedERUSF (B)	-0.07906	-0.67451	0.299689	0.138434	0.497868	0.138434	0.497868		abundance	429	429	head
head_circumference_cm	Feed	Local RUSF (A)	FeedLocal RUSF (A)	-1.23458	-0.69183	0.205795	0.146465	0.497868	0.146465	0.497868		abundance	429	429	head
ear_to_ear_measurement_back_cm	timepoint	yr2:FeedLocal RUSF (A)	timepointyr2:FeedLocal RUSF (A)	-0.07112	0.266715	0.205901	0.159318	0.497868	0.159318	0.497868		abundance	429	429	head
ear_to_ear_measurement_back_cm	timepoint	yr2:FeedERUSF (B)	timepointyr2:FeedERUSF (B)	-0.21844	0.136303	0.207674	0.192862	0.534361	0.192862	0.534361		abundance	429	429	head
nasion_to_inion_measurement_cm	timepoint	yr2:FeedERUSF (B)	timepointyr2:FeedERUSF (B)	-0.37042	0.136303	0.384167	0.213744	0.534361	0.213744	0.534361		abundance	429	429	head
nasion_to_inion_measurement_cm	timepoint	yr2:FeedLocal RUSF (A)	timepointyr2:FeedLocal RUSF (A)	-0.13396	0.266715	0.380932	0.284706	0.647059	0.284706	0.647059		abundance	429	429	head
ear_to_ear_measurement_top_head_cm	timepoint	yr2:FeedERUSF (B)	timepointyr2:FeedERUSF (B)	0.43541	0.136303	0.2948	0.353259	0.735956	0.353259	0.735956		abundance	429	429	head
nasion_to_inion_measurement_cm	timepoint	yr2	timepointyr2	1.47313	1.185	0.278827	0.417194	0.784956	0.417194	0.784956		abundance	429	429	head
ear_to_ear_measurement_front_cm	timepoint	yr2:FeedERUSF (B)	timepointyr2:FeedERUSF (B)	0.321359	0.136303	0.223796	0.480597	0.784956	0.480597	0.784956		abundance	429	429	head
ear_to_ear_measurement_top_head_cm	Feed	Local RUSF (A)	FeedLocal RUSF (A)	-0.94919	-0.69183	0.256333	0.494739	0.784956	0.494739	0.784956		abundance	429	429	head
ear_to_ear_measurement_top_head_cm	timepoint	yr2:FeedLocal RUSF (A)	timepointyr2:FeedLocal RUSF (A)	0.458388	0.266715	0.292235	0.502372	0.784956	0.502372	0.784956		abundance	429	429	head
ear_to_ear_measurement_front_cm	timepoint	yr2:FeedLocal RUSF (A)	timepointyr2:FeedLocal RUSF (A)	0.383885	0.266715	0.221916	0.600665	0.88333	0.600665	0.88333		abundance	429	429	head
ear_to_ear_measurement_top_head_cm	timepoint	yr2	timepointyr2	1.08162	1.185	0.21412	0.731464	1	0.731464	1		abundance	429	429	head
ear_to_ear_measurement_front_cm	Feed	ERUSF (B)	FeedERUSF (B)	-0.65523	-0.67451	0.173202	0.945175	1	0.945175	1		abundance	429	429	head
ear_to_ear_measurement_back_cm	Feed	Local RUSF (A)	FeedLocal RUSF (A)	-0.67586	-0.69183	0.168113	0.96036	1	0.96036	1		abundance	429	429	head
ear_to_ear_measurement_back_cm	timepoint	yr2	timepointyr2	1.185	1.185	0.150773	1	1	1	1		abundance	429	429	head
ear_to_ear_measurement_back_cm	Feed	ERUSF (B)	FeedERUSF (B)	-0.67451	-0.67451	0.169156	1	1	1	1		abundance	429	429	head
ear_to_ear_measurement_front_cm	Feed	Local RUSF (A)	FeedLocal RUSF (A)	-0.69183	-0.69183	0.172134	1	1	1	1		abundance	429	429	head
head_circumference_cm	timepoint	yr2:FeedERUSF (B)	timepointyr2:FeedERUSF (B)	0.136303	0.136303	0.13415	1	1	1	1		abundance	429	429	head
head_circumference_cm	timepoint	yr2:FeedLocal RUSF (A)	timepointyr2:FeedLocal RUSF (A)	0.266715	0.266715	0.13289	1	1	1	1		abundance	429	429	head
TRNA-CHARGING-PWY	timepoint	yr2	timepointyr2	0.347446	-0.52356	0.046914	2.36e-38	9.6e-35	2.36e-38	6.06e-35		abundance	439	439	pathways
PWY-1042	timepoint	yr2	timepointyr2	0.605732	-0.52356	0.065111	2.77e-35	5.64e-32	2.77e-35	3.56e-32		abundance	439	439	pathways
CALVIN-PWY	timepoint	yr2	timepointyr2	0.171138	-0.52356	0.03386	3.64e-34	4.93e-31	3.64e-34	3.11e-31		abundance	439	439	pathways
PWY-7953	timepoint	yr2	timepointyr2	0.377054	-0.52356	0.056773	5.9e-33	5.99e-30	5.9e-33	3.78e-30		abundance	439	439	pathways
PWY-5695	timepoint	yr2	timepointyr2	0.274024	-0.52356	0.047865	2.22e-32	1.8e-29	2.22e-32	1.14e-29		abundance	439	439	pathways
PWY-6700	timepoint	yr2	timepointyr2	0.668601	-0.52356	0.081647	9.69e-30	6.56e-27	9.69e-30	4.14e-27		abundance	439	439	pathways
PWY-7199	timepoint	yr2	timepointyr2	0.621379	-0.52356	0.077278	1.47e-29	8.55e-27	1.47e-29	5.4e-27		abundance	439	439	pathways
PWY-3841	timepoint	yr2	timepointyr2	0.260552	-0.52356	0.051036	1.86e-29	9.47e-27	1.86e-29	5.98e-27		abundance	439	439	pathways
PWY-6897	timepoint	yr2	timepointyr2	0.403269	-0.52356	0.059267	3.98e-29	1.8e-26	3.98e-29	1.14e-26		abundance	439	439	pathways
1CMET2-PWY	timepoint	yr2	timepointyr2	0.173917	-0.52356	0.044215	2.73e-28	1.11e-25	2.73e-28	7e-26		abundance	439	439	pathways
PWY-7977	timepoint	yr2	timepointyr2	0.363889	-0.52356	0.063628	3.71e-28	1.37e-25	3.71e-28	8.66e-26		abundance	439	439	pathways
PANTOSYN-PWY	timepoint	yr2	timepointyr2	0.297181	-0.52356	0.057709	4.24e-28	1.44e-25	4.24e-28	9.07e-26		abundance	439	439	pathways
PWY-6385	timepoint	yr2	timepointyr2	0.268137	-0.52356	0.049654	7.7e-28	2.41e-25	7.7e-28	1.52e-25		abundance	439	439	pathways
PEPTIDOGLYCANSYN-PWY	timepoint	yr2	timepointyr2	0.309981	-0.52356	0.053754	9.16e-28	2.66e-25	9.16e-28	1.68e-25		abundance	439	439	pathways
PWY-6387	timepoint	yr2	timepointyr2	0.29613	-0.52356	0.053284	1.43e-27	3.87e-25	1.43e-27	2.44e-25		abundance	439	439	pathways
ANAGLYCOLYSIS-PWY	timepoint	yr2	timepointyr2	0.154198	-0.52356	0.038139	2.2e-27	5.58e-25	2.2e-27	3.52e-25		abundance	439	439	pathways
NONMEVIPP-PWY	timepoint	yr2	timepointyr2	0.267807	-0.52356	0.056174	2.63e-27	6.3e-25	2.63e-27	3.97e-25		abundance	439	439	pathways
PWY-7221	timepoint	yr2	timepointyr2	0.299973	-0.52356	0.053592	3.28e-27	7.4e-25	3.28e-27	4.67e-25		abundance	439	439	pathways
PWY-6122	timepoint	yr2	timepointyr2	0.192991	-0.52356	0.047899	3.63e-27	7.76e-25	3.63e-27	4.9e-25		abundance	439	439	pathways
PWY-6277	timepoint	yr2	timepointyr2	0.192991	-0.52356	0.047899	4.23e-27	8.6e-25	4.23e-27	5.43e-25		abundance	439	439	pathways
PWY-6386	timepoint	yr2	timepointyr2	0.280252	-0.52356	0.052574	7.35e-27	1.42e-24	7.35e-27	8.98e-25		abundance	439	439	pathways
PWY-7791	timepoint	yr2	timepointyr2	0.394502	-0.52356	0.067213	3.24e-25	5.98e-23	3.24e-25	3.78e-23		abundance	439	439	pathways
PWY-6609	timepoint	yr2	timepointyr2	0.419983	-0.52356	0.070053	3.54e-25	6.26e-23	3.54e-25	3.95e-23		abundance	439	439	pathways
PWY-5686	timepoint	yr2	timepointyr2	0.320603	-0.52356	0.060568	4.29e-25	6.97e-23	4.29e-25	4.4e-23		abundance	439	439	pathways
PWY-7790	timepoint	yr2	timepointyr2	0.394502	-0.52356	0.067213	4.22e-25	6.97e-23	4.22e-25	4.4e-23		abundance	439	439	pathways
UNMAPPED	timepoint	yr2	timepointyr2	0.407897	-0.52356	0.072512	1.29e-23	2.01e-21	1.29e-23	1.27e-21		abundance	439	439	pathways
PANTO-PWY	timepoint	yr2	timepointyr2	0.235347	-0.52356	0.055513	3.19e-23	4.8e-21	3.19e-23	3.03e-21		abundance	439	439	pathways
PWY-6163	timepoint	yr2	timepointyr2	0.191597	-0.52356	0.056792	1.1e-22	1.59e-20	1.1e-22	1.01e-20		abundance	439	439	pathways
PWY-6151	timepoint	yr2	timepointyr2	0.315583	-0.52356	0.065926	1.24e-22	1.74e-20	1.24e-22	1.1e-20		abundance	439	439	pathways
ILEUSYN-PWY	timepoint	yr2	timepointyr2	0.104411	-0.52356	0.043101	2.27e-22	3.07e-20	2.27e-22	1.94e-20		abundance	439	439	pathways
BRANCHED-CHAIN-AA-SYN-PWY	timepoint	yr2	timepointyr2	0.112587	-0.52356	0.043743	3.47e-22	4.55e-20	3.47e-22	2.87e-20		abundance	439	439	pathways
PWY-5097	timepoint	yr2	timepointyr2	0.167287	-0.52356	0.051331	5.96e-22	7.57e-20	5.96e-22	4.78e-20		abundance	439	439	pathways
PWY-5103	timepoint	yr2	timepointyr2	0.135409	-0.52356	0.047507	6.18e-22	7.61e-20	6.18e-22	4.8e-20		abundance	439	439	pathways
VALSYN-PWY	timepoint	yr2	timepointyr2	0.060435	-0.52356	0.038485	9.34e-22	1.12e-19	9.34e-22	7.04e-20		abundance	439	439	pathways
ARO-PWY	timepoint	yr2	timepointyr2	0.082055	-0.52356	0.048834	2.84e-20	3.29e-18	2.84e-20	2.08e-18		abundance	439	439	pathways
ASPASN-PWY	timepoint	yr2	timepointyr2	0.167332	-0.52356	0.056416	7.69e-20	8.68e-18	7.69e-20	5.48e-18		abundance	439	439	pathways
PWY-7237	timepoint	yr2	timepointyr2	0.535427	-0.52356	0.097744	1.1e-19	1.21e-17	2.2e-19	1.49e-17		abundance	439	411	pathways
UNINTEGRATED	timepoint	yr2	timepointyr2	-0.09184	-0.52356	0.018684	2.08e-19	2.23e-17	2.08e-19	1.44e-17		abundance	439	439	pathways
PWY-7357	timepoint	yr2	timepointyr2	0.200836	-0.52356	0.061583	2.32e-19	2.42e-17	2.32e-19	1.53e-17		abundance	439	439	pathways
COMPLETE-ARO-PWY	timepoint	yr2	timepointyr2	0.049532	-0.52356	0.046677	2.84e-19	2.88e-17	2.84e-19	1.82e-17		abundance	439	439	pathways
PWY-2942	timepoint	yr2	timepointyr2	0.107764	-0.52356	0.052717	1.25e-18	1.24e-16	1.25e-18	7.83e-17		abundance	439	439	pathways
PWY-5973	timepoint	yr2	timepointyr2	0.125213	-0.52356	0.059258	2.53e-18	2.44e-16	2.53e-18	1.54e-16		abundance	439	439	pathways
PWY-7560	timepoint	yr2	timepointyr2	0.129947	-0.52356	0.057048	4.8e-18	4.54e-16	4.8e-18	2.87e-16		abundance	439	439	pathways
DTDPRHAMSYN-PWY	timepoint	yr2	timepointyr2	0.633881	-0.52356	0.11692	7.29e-18	6.73e-16	7.29e-18	4.25e-16		abundance	439	439	pathways
PYRIDNUCSYN-PWY	timepoint	yr2	timepointyr2	0.034765	-0.52356	0.049434	2.2e-17	1.99e-15	2.2e-17	1.25e-15		abundance	439	439	pathways
PWY-7229	timepoint	yr2	timepointyr2	0.128043	-0.52356	0.060634	7.66e-17	6.77e-15	7.66e-17	4.27e-15		abundance	439	439	pathways
COA-PWY	timepoint	yr2	timepointyr2	0.0873	-0.52356	0.062257	9.87e-16	8.54e-14	9.87e-16	5.39e-14		abundance	439	439	pathways
PWY-7851	timepoint	yr2	timepointyr2	0.096762	-0.52356	0.064671	2.61e-15	2.21e-13	2.61e-15	1.4e-13		abundance	439	439	pathways
HISTSYN-PWY	timepoint	yr2	timepointyr2	0.083178	-0.52356	0.06291	3.14e-15	2.6e-13	3.14e-15	1.64e-13		abundance	439	439	pathways
PWY-5154	timepoint	yr2	timepointyr2	0.084854	-0.52356	0.066654	2.6e-14	2.11e-12	2.6e-14	1.33e-12		abundance	439	439	pathways
PWY-6126	timepoint	yr2	timepointyr2	0.136837	-0.52356	0.071343	4.74e-14	3.78e-12	4.74e-14	2.39e-12		abundance	439	439	pathways
PWY-6703	timepoint	yr2	timepointyr2	0.319756	-0.52356	0.102076	6.16e-14	4.82e-12	6.16e-14	3.04e-12		abundance	439	439	pathways
PWY-6147	timepoint	yr2	timepointyr2	0.281421	-0.52356	0.098696	2.03e-13	1.56e-11	2.03e-13	9.82e-12		abundance	439	439	pathways
PWY-7208	timepoint	yr2	timepointyr2	0.181301	-0.52356	0.08113	2.32e-13	1.75e-11	2.32e-13	1.1e-11		abundance	439	439	pathways
PWY-8178	timepoint	yr2	timepointyr2	0.002301	-0.52356	0.058053	3.46e-13	2.55e-11	3.46e-13	1.61e-11		abundance	439	439	pathways
PWY-7228	timepoint	yr2	timepointyr2	0.107134	-0.52356	0.071455	4.18e-13	3.03e-11	4.18e-13	1.91e-11		abundance	439	439	pathways
PWY0-1296	timepoint	yr2	timepointyr2	0.238437	-0.52356	0.092463	8.28e-13	5.9e-11	8.28e-13	3.72e-11		abundance	439	439	pathways
PWY-1269	timepoint	yr2	timepointyr2	0.281557	-0.52356	0.098526	8.51e-13	5.96e-11	8.51e-13	3.76e-11		abundance	439	439	pathways
COA-PWY-1	timepoint	yr2	timepointyr2	-0.00437	-0.52356	0.058574	1.13e-12	7.77e-11	1.13e-12	4.9e-11		abundance	439	439	pathways
GLYCOGENSYNTH-PWY	timepoint	yr2	timepointyr2	0.027729	-0.52356	0.062912	2.11e-12	1.43e-10	2.11e-12	9.04e-11		abundance	439	439	pathways
PWY-6125	timepoint	yr2	timepointyr2	0.118056	-0.52356	0.07856	5.11e-12	3.4e-10	5.11e-12	2.15e-10		abundance	439	439	pathways
RIBOSYN2-PWY	timepoint	yr2	timepointyr2	0.035249	-0.52356	0.07209	3.05e-11	2e-09	3.05e-11	1.26e-09		abundance	439	439	pathways
PWY-841	timepoint	yr2	timepointyr2	-0.04302	-0.52356	0.056484	3.38e-11	2.18e-09	3.38e-11	1.38e-09		abundance	439	439	pathways
PWY66-429	timepoint	yr2	timepointyr2	0.02198	-0.52356	0.071527	6.98e-11	4.43e-09	6.98e-11	2.8e-09		abundance	439	439	pathways
PWY-5667	timepoint	yr2	timepointyr2	0.01732	-0.52356	0.070857	1.34e-10	8.36e-09	1.34e-10	5.28e-09		abundance	439	439	pathways
PWY-6527	timepoint	yr2	timepointyr2	0.002999	-0.52356	0.068919	1.95e-10	1.2e-08	1.95e-10	7.6e-09		abundance	439	439	pathways
PWY0-1319	timepoint	yr2	timepointyr2	0.017384	-0.52356	0.070832	2.11e-10	1.28e-08	2.11e-10	8.08e-09		abundance	439	439	pathways
OANTIGEN-PWY	timepoint	yr2	timepointyr2	-0.02583	-0.52356	0.069006	1.81e-09	1.08e-07	1.81e-09	6.82e-08		abundance	439	439	pathways
GLUCONEO-PWY	timepoint	yr2	timepointyr2	-0.05337	-0.52356	0.064313	2.29e-09	1.33e-07	2.29e-09	8.51e-08		abundance	439	439	pathways
PWY-6292	timepoint	yr2	timepointyr2	0.954495	-0.52356	0.23284	2.27e-09	1.33e-07	4.53e-09	1.66e-07		abundance	439	438	pathways
PWY-6121	timepoint	yr2	timepointyr2	-0.13053	-0.52356	0.053876	1.31e-08	7.47e-07	1.31e-08	4.72e-07		abundance	439	439	pathways
HSERMETANA-PWY	timepoint	yr2	timepointyr2	-0.01494	-0.52356	0.075786	1.42e-08	8.01e-07	1.42e-08	5.05e-07		abundance	439	439	pathways
PWY-7663	timepoint	yr2	timepointyr2	-0.08405	-0.52356	0.064793	2.04e-08	1.14e-06	2.04e-08	7.18e-07		abundance	439	439	pathways
RHAMCAT-PWY	timepoint	yr2	timepointyr2	0.303197	-0.52356	0.138935	3.22e-08	1.77e-06	3.22e-08	1.12e-06		abundance	439	439	pathways
FASYN-INITIAL-PWY	timepoint	yr2	timepointyr2	-2.10129	-0.52356	0.276379	5.12e-08	2.77e-06	1.02e-07	3.5e-06		abundance	439	386	pathways
PWY-7222	timepoint	yr2	timepointyr2	0.025127	-0.52356	0.092786	1.18e-07	6.31e-06	1.18e-07	3.98e-06		abundance	439	439	pathways
PWY-5994	timepoint	yr2	timepointyr2	-2.71251	-0.52356	0.396562	1.23e-07	6.48e-06	2.45e-07	7.97e-06		abundance	439	347	pathways
PWY-7220	timepoint	yr2	timepointyr2	0.025127	-0.52356	0.092786	1.44e-07	7.49e-06	1.44e-07	4.79e-06		abundance	439	439	pathways
PWY0-1586	timepoint	yr2	timepointyr2	-0.09274	-0.52356	0.070585	1.57e-07	8.09e-06	1.57e-07	5.17e-06		abundance	439	439	pathways
PHOSLIPSYN-PWY	timepoint	yr2	timepointyr2	-0.08467	-0.52356	0.075451	3.64e-07	1.85e-05	3.64e-07	1.17e-05		abundance	439	439	pathways
PWY-7197	timepoint	yr2	timepointyr2	-0.03488	-0.52356	0.085109	4.16e-07	2.09e-05	4.16e-07	1.32e-05		abundance	439	439	pathways
PWY-7383	timepoint	yr2	timepointyr2	1.15509	-0.52356	0.324147	4.52e-07	2.23e-05	9.05e-07	2.75e-05		abundance	439	344	pathways
PWY-7456	timepoint	yr2	timepointyr2	0.3957	-0.52356	0.172756	4.55e-07	2.23e-05	9.11e-07	2.75e-05		abundance	439	427	pathways
PWY66-399	timepoint	yr2	timepointyr2	1.06137	-0.52356	0.305766	4.62e-07	2.24e-05	9.25e-07	2.76e-05		abundance	439	344	pathways
PWY-5505	timepoint	yr2	timepointyr2	0.701861	-0.52356	0.235507	6.34e-07	3.03e-05	1.27e-06	3.7e-05		abundance	439	421	pathways
PWY-6936	timepoint	yr2	timepointyr2	-0.10936	-0.52356	0.072353	6.81e-07	3.22e-05	6.81e-07	2.13e-05		abundance	439	439	pathways
PWY-4041	timepoint	yr2	timepointyr2	-1.33861	-0.52356	0.156298	8.77e-07	4.1e-05	8.77e-07	2.71e-05		abundance	439	439	pathways
PWY-622	timepoint	yr2	timepointyr2	-1.60784	-0.52356	0.210923	8.92e-07	4.12e-05	1.78e-06	5.08e-05		abundance	439	425	pathways
PWY-6823	timepoint	yr2	timepointyr2	0.046221	-0.52356	0.107681	1.03e-06	4.68e-05	1.03e-06	3.02e-05		abundance	439	439	pathways
PWY-6317	timepoint	yr2	timepointyr2	-0.17295	-0.52356	0.058836	1.28e-06	5.79e-05	1.28e-06	3.7e-05		abundance	439	439	pathways
METH-ACETATE-PWY	timepoint	yr2	timepointyr2	0.755099	-0.52356	0.251578	1.46e-06	6.5e-05	2.91e-06	8.21e-05		abundance	439	294	pathways
PWY-6607	timepoint	yr2	timepointyr2	-1.69	-0.52356	0.239624	2.87e-06	0.000127	5.73e-06	0.000156		abundance	439	435	pathways
COBALSYN-PWY	timepoint	yr2	timepointyr2	0.167866	-0.52356	0.140728	4.02e-06	0.000176	4.02e-06	0.000112		abundance	439	439	pathways
PWY-724	timepoint	yr2	timepointyr2	-0.20367	-0.52356	0.055448	4.11e-06	0.000178	4.11e-06	0.000113		abundance	439	439	pathways
P4-PWY	timepoint	yr2	timepointyr2	-1.47962	-0.52356	0.208577	1.06e-05	0.000453	2.12e-05	0.00056		abundance	439	436	pathways
PWY0-781	timepoint	yr2	timepointyr2	-1.45409	-0.52356	0.204215	1.28e-05	0.000542	2.56e-05	0.000657		abundance	439	436	pathways
PWY0-1477	timepoint	yr2	timepointyr2	-1.46556	-0.52356	0.208358	1.41e-05	0.00059	1.41e-05	0.00038		abundance	439	439	pathways
PWY-702	timepoint	yr2	timepointyr2	-1.17229	-0.52356	0.141367	1.57e-05	0.000653	1.57e-05	0.000421		abundance	439	439	pathways
PWY-621	timepoint	yr2	timepointyr2	-1.25924	-0.52356	0.164881	2.18e-05	0.000893	2.18e-05	0.00057		abundance	439	439	pathways
ARGSYN-PWY	timepoint	yr2	timepointyr2	-0.19831	-0.52356	0.065636	2.56e-05	0.001039	2.56e-05	0.000657		abundance	439	439	pathways
P161-PWY	timepoint	yr2	timepointyr2	-1.57849	-0.52356	0.242586	2.61e-05	0.001051	5.22e-05	0.001301		abundance	439	437	pathways
UBISYN-PWY	timepoint	yr2	timepointyr2	-1.48547	0	0.354808	2.83e-05	0.001128	5.66e-05	0.001396		prevalence	439	292	pathways
GLUCUROCAT-PWY	timepoint	yr2	timepointyr2	0.026197	-0.52356	0.124498	3.6e-05	0.001415	3.6e-05	0.00091		abundance	439	439	pathways
GLUTORN-PWY	timepoint	yr2	timepointyr2	-0.20702	-0.52356	0.065341	3.62e-05	0.001415	3.62e-05	0.00091		abundance	439	439	pathways
PWY-6595	timepoint	yr2	timepointyr2	-1.48834	-0.52356	0.228469	4.56e-05	0.001766	9.13e-05	0.002208		abundance	439	435	pathways
PWY-6708	timepoint	yr2	timepointyr2	-1.43793	0	0.354554	5e-05	0.001917	0.0001	0.002397		prevalence	439	293	pathways
PWY-5130	timepoint	yr2	timepointyr2	-1.64997	-0.52356	0.274449	6.78e-05	0.002576	0.000136	0.003192		abundance	439	411	pathways
COLANSYN-PWY	timepoint	yr2	timepointyr2	-0.06936	-0.52356	0.107648	8.35e-05	0.003142	8.35e-05	0.00204		abundance	439	439	pathways
ALLANTOINDEG-PWY	timepoint	yr2	timepointyr2	0.751043	-0.52356	0.314585	8.45e-05	0.00315	0.000169	0.00394		abundance	439	315	pathways
PWY-5384	timepoint	yr2	timepointyr2	-1.10416	-0.52356	0.144068	0.000129	0.004751	0.000129	0.003054		abundance	439	439	pathways
PWY3O-4107	timepoint	yr2	timepointyr2	-1.24955	-0.52356	0.182395	0.000134	0.004893	0.000267	0.006067		abundance	439	437	pathways
PWY-7242	timepoint	yr2	timepointyr2	0.020466	-0.52356	0.137203	0.000178	0.006457	0.000178	0.004112		abundance	439	439	pathways
PWY-5675	timepoint	yr2	timepointyr2	-1.6894	-0.52356	0.305744	0.000197	0.007076	0.000393	0.008626		abundance	439	432	pathways
NONOXIPENT-PWY	timepoint	yr2	timepointyr2	-0.21468	-0.52356	0.074226	0.000263	0.009385	0.000263	0.006029		abundance	439	439	pathways
PWY-7196	timepoint	yr2	timepointyr2	0.43472	-0.52356	0.257022	0.000271	0.009565	0.000541	0.011666		abundance	439	342	pathways
PWY-6531	timepoint	yr2	timepointyr2	-1.55041	-0.52356	0.276646	0.000293	0.010282	0.000587	0.012339		abundance	439	428	pathways
HISDEG-PWY	timepoint	yr2	timepointyr2	0.39457	-0.52356	0.246728	0.000296	0.010291	0.000592	0.012355		abundance	439	435	pathways
HOMOSER-METSYN-PWY	timepoint	yr2	timepointyr2	-1.58617	-0.52356	0.286784	0.0003	0.01032	0.000599	0.012395		abundance	439	436	pathways
PWY4FS-8	timepoint	yr2	timepointyr2	-0.1679	-0.52356	0.089879	0.000307	0.010501	0.000307	0.006919		abundance	439	439	pathways
PWY4FS-7	timepoint	yr2	timepointyr2	-0.16794	-0.52356	0.089884	0.000317	0.010719	0.000317	0.007059		abundance	439	439	pathways
GLUCARGALACTSUPER-PWY	timepoint	yr2	timepointyr2	-1.60093	-0.52356	0.294224	0.000349	0.011634	0.000697	0.014302		abundance	439	434	pathways
PWY0-162	timepoint	yr2	timepointyr2	-0.21007	-0.52356	0.07703	0.000349	0.011634	0.000349	0.007723		abundance	439	439	pathways
GALACTARDEG-PWY	timepoint	yr2	timepointyr2	-1.60093	-0.52356	0.294224	0.000362	0.011952	0.000723	0.014685		abundance	439	434	pathways
PWY1G-0	timepoint	yr2	timepointyr2	0.750961	-0.52356	0.332422	0.000393	0.012895	0.000787	0.01576		abundance	439	92	pathways
METSYN-PWY	timepoint	yr2	timepointyr2	-1.50595	-0.52356	0.27018	0.000397	0.012895	0.000793	0.01576		abundance	439	436	pathways
PWY-6549	timepoint	yr2	timepointyr2	0.203121	-0.52356	0.199565	0.000403	0.012983	0.000805	0.01576		abundance	439	435	pathways
PWY-6507	timepoint	yr2	timepointyr2	-0.02475	-0.52356	0.134822	0.000456	0.014588	0.000456	0.009909		abundance	439	439	pathways
MET-SAM-PWY	timepoint	yr2	timepointyr2	-1.46219	-0.52356	0.263542	0.000515	0.016346	0.001029	0.019559		abundance	439	436	pathways
GALACTITOLCAT-PWY	timepoint	yr2	timepointyr2	-1.61166	-0.52356	0.307079	0.000523	0.016476	0.001046	0.019716		abundance	439	417	pathways
PWY-6328	timepoint	yr2	timepointyr2	-1.19392	0	0.344404	0.000527	0.016476	0.001054	0.019716		prevalence	439	322	pathways
PWY-5136	timepoint	yr2	timepointyr2	-1.36629	-0.52356	0.237494	0.000562	0.017251	0.000562	0.011968		abundance	439	439	pathways
PWY-5347	timepoint	yr2	timepointyr2	-1.45972	-0.52356	0.26387	0.000556	0.017251	0.001112	0.02052		abundance	439	436	pathways
PWY-7356	timepoint	yr2	timepointyr2	-1.07674	-0.52356	0.153261	0.000565	0.017251	0.000565	0.011968		abundance	439	439	pathways
HEXITOLDEGSUPER-PWY	timepoint	yr2	timepointyr2	-1.4513	-0.52356	0.26703	0.000702	0.02119	0.001404	0.025243		abundance	439	417	pathways
RUMP-PWY	timepoint	yr2	timepointyr2	1.01674	-0.52356	0.442226	0.000704	0.02119	0.001407	0.025243		abundance	439	180	pathways
PENTOSE-P-PWY	timepoint	yr2	timepointyr2	-0.94906	-0.52356	0.118294	0.000727	0.021727	0.000727	0.014685		abundance	439	439	pathways
PWY-7117	timepoint	yr2	timepointyr2	-0.98428	-0.52356	0.129907	0.0008	0.023629	0.0008	0.01576		abundance	439	439	pathways
METH-ACETATE-PWY	timepoint	yr2	timepointyr2	1.16917	0	0.348798	0.000802	0.023629	2.91e-06	8.21e-05		prevalence	439	294	pathways
GLUCOSE1PMETAB-PWY	timepoint	yr2	timepointyr2	-0.2357	-0.52356	0.075723	0.000848	0.024624	0.001696	0.029793		abundance	439	435	pathways
PWY-7328	timepoint	yr2	timepointyr2	-0.10239	-0.52356	0.119181	0.000846	0.024624	0.000846	0.016433		abundance	439	439	pathways
ARGSYNBSUB-PWY	timepoint	yr2	timepointyr2	-0.24879	-0.52356	0.07253	0.000944	0.027201	0.000944	0.018201		abundance	439	439	pathways
PWY-7805	timepoint	yr2	timepointyr2	-1.12409	0	0.340175	0.000952	0.027235	0.001902	0.032969		prevalence	439	311	pathways
GALACTUROCAT-PWY	timepoint	yr2	timepointyr2	-0.07664	-0.52356	0.128228	0.000992	0.0282	0.000992	0.018994		abundance	439	439	pathways
PWY-7039	timepoint	yr2	timepointyr2	-2.02258	-0.52356	0.438471	0.001022	0.028845	0.002043	0.034705		abundance	439	154	pathways
PWY-1042	Feed	ERUSF (B)	FeedERUSF (B)	0.178925	-0.04231	0.063573	0.001061	0.029731	0.001061	0.019716		abundance	439	439	pathways
POLYAMINSYN3-PWY	timepoint	yr2	timepointyr2	0.53894	-0.52356	0.318227	0.001152	0.032077	0.002303	0.03887		abundance	439	275	pathways
PWY-1861	timepoint	yr2	timepointyr2	0.586991	-0.52356	0.337101	0.001167	0.032276	0.002334	0.039122		abundance	439	377	pathways
GLUCARDEG-PWY	timepoint	yr2	timepointyr2	-1.50335	-0.52356	0.296303	0.001211	0.032929	0.00242	0.03969		abundance	439	434	pathways
PWY-6071	timepoint	yr2	timepointyr2	-1.06342	0	0.3287	0.001215	0.032929	0.002429	0.03969		prevalence	439	260	pathways
PWY0-321	timepoint	yr2	timepointyr2	-1.06342	0	0.3287	0.001215	0.032929	0.002429	0.03969		prevalence	439	260	pathways
PYRIDNUCSAL-PWY	timepoint	yr2	timepointyr2	-1.08368	-0.52356	0.16742	0.001271	0.034216	0.002541	0.040992		abundance	439	437	pathways
ARGININE-SYN4-PWY	timepoint	yr2	timepointyr2	-1.42706	-0.52356	0.274567	0.001331	0.035599	0.002661	0.042662		abundance	439	435	pathways
PWY4LZ-257	timepoint	yr2	timepointyr2	-1.23636	-0.52356	0.216643	0.001366	0.03628	0.00273	0.043491		abundance	439	437	pathways
PWY-I9	timepoint	yr2	timepointyr2	-1.02572	-0.52356	0.149969	0.001377	0.036334	0.001377	0.025225		abundance	439	439	pathways
PWY-3001	timepoint	yr2	timepointyr2	-0.3031	-0.52356	0.054884	0.001395	0.036586	0.001395	0.025243		abundance	439	439	pathways
POLYAMINSYN3-PWY	timepoint	yr2	timepointyr2	1.09784	0	0.344372	0.001433	0.037329	0.002303	0.03887		prevalence	439	275	pathways
PWY-6123	timepoint	yr2	timepointyr2	-0.26848	-0.52356	0.069217	0.001461	0.037817	0.001461	0.026023		abundance	439	439	pathways
GLYOXYLATE-BYPASS	timepoint	yr2	timepointyr2	-1.45261	-0.52356	0.285639	0.001475	0.037927	0.002947	0.046659		abundance	439	430	pathways
PWY0-301	timepoint	yr2	timepointyr2	-1.52351	-0.52356	0.30887	0.001518	0.038795	0.003033	0.047734		abundance	439	426	pathways
PWY0-461	timepoint	yr2	timepointyr2	-1.07676	0	0.340234	0.001552	0.039422	0.003102	0.048511		prevalence	439	287	pathways
P461-PWY	timepoint	yr2	timepointyr2	-1.2743	-0.52356	0.232709	0.001675	0.042274	0.001675	0.029626		abundance	439	439	pathways
ANAGLYCOLYSIS-PWY	Feed	ERUSF (B)	FeedERUSF (B)	0.092105	-0.04231	0.036856	0.00175	0.043913	0.00175	0.030544		abundance	439	439	pathways
FUCCAT-PWY	timepoint	yr2	timepointyr2	-1.33625	-0.52356	0.254435	0.001814	0.045223	0.003624	0.056003		abundance	439	434	pathways
PWY-5994	timepoint	yr2	timepointyr2	-1.11521	0	0.357921	0.001834	0.045459	2.45e-07	7.97e-06		prevalence	439	347	pathways
PWY-6519	timepoint	yr2	timepointyr2	-1.12646	-0.52356	0.18777	0.001866	0.045959	0.003728	0.05725		abundance	439	438	pathways
GOLPDLCAT-PWY	timepoint	yr2	timepointyr2	0.196924	-0.52356	0.227281	0.001879	0.045992	0.003754	0.05725		abundance	439	431	pathways
PWY-7883	timepoint	yr2	timepointyr2	0.124546	-0.52356	0.203059	0.001899	0.046212	0.003794	0.05725		abundance	439	435	pathways
P124-PWY	timepoint	yr2	timepointyr2	-1.25563	-0.52356	0.22939	0.001929	0.046377	0.003853	0.057801		abundance	439	432	pathways
PWY0-1061	timepoint	yr2	timepointyr2	-1.045	-0.52356	0.161521	0.001928	0.046377	0.001928	0.033196		abundance	439	439	pathways
PWY-7323	timepoint	yr2	timepointyr2	-0.01261	-0.52356	0.158292	0.001949	0.046584	0.001949	0.033322		abundance	439	439	pathways
PWY-5723	timepoint	yr2	timepointyr2	-1.45265	-0.52356	0.294784	0.002005	0.047642	0.004005	0.059383		abundance	439	423	pathways
KETOGLUCONMET-PWY	timepoint	yr2	timepointyr2	-1.58737	-0.52356	0.338849	0.002035	0.048072	0.004065	0.059923		abundance	439	414	pathways
HEME-BIOSYNTHESIS-II-1	timepoint	yr2	timepointyr2	-1.39852	-0.52356	0.278646	0.002125	0.049626	0.004245	0.061516		abundance	439	435	pathways
PWY-6210	timepoint	yr2	timepointyr2	1.66159	-0.52356	0.686287	0.002119	0.049626	0.004234	0.061516		abundance	439	123	pathways
PWY-7118	timepoint	yr2	timepointyr2	-1.42326	-0.52356	0.288473	0.002281	0.052968	0.004556	0.065293		abundance	439	426	pathways
FAO-PWY	timepoint	yr2	timepointyr2	-1.40758	-0.52356	0.284911	0.00237	0.054719	0.004734	0.067457		abundance	439	423	pathways
P441-PWY	timepoint	yr2	timepointyr2	-0.99852	-0.52356	0.14977	0.002391	0.054898	0.002391	0.03969		abundance	439	439	pathways
PWY-6282	timepoint	yr2	timepointyr2	-1.07609	-0.52356	0.17669	0.002461	0.056181	0.002461	0.039947		abundance	439	439	pathways
PWY-6396	timepoint	yr2	timepointyr2	-1.02894	0	0.340318	0.002499	0.056733	0.004991	0.070735		prevalence	439	236	pathways
PWY-5918	timepoint	yr2	timepointyr2	-1.19426	-0.52356	0.219563	0.002853	0.064413	0.005698	0.078574		abundance	439	437	pathways
PWY66-391	timepoint	yr2:FeedERUSF (B)	timepointyr2:FeedERUSF (B)	-1.20626	-0.04225	0.385912	0.003078	0.069113	0.006147	0.08342		abundance	439	277	pathways
PWY-5654	timepoint	yr2	timepointyr2	1.59286	-0.52356	0.692796	0.003171	0.070736	0.006332	0.085414		abundance	439	122	pathways
PWY-5837	timepoint	yr2	timepointyr2	-1.241	-0.52356	0.237366	0.003185	0.070736	0.00636	0.085414		abundance	439	428	pathways
PWY-5862	timepoint	yr2	timepointyr2	-1.22645	-0.52356	0.233978	0.003348	0.073538	0.006684	0.088373		abundance	439	409	pathways
PWY-8086	timepoint	yr2	timepointyr2	-1.48335	-0.52356	0.322666	0.003341	0.073538	0.006671	0.088373		abundance	439	356	pathways
PWY-7204	timepoint	yr2	timepointyr2	-1.47431	-0.52356	0.319292	0.003502	0.076522	0.006992	0.091975		abundance	439	405	pathways
BIOTIN-BIOSYNTHESIS-PWY	timepoint	yr2	timepointyr2	-1.06085	-0.52356	0.177845	0.003544	0.076529	0.007075	0.092122		abundance	439	438	pathways
P42-PWY	timepoint	yr2:FeedERUSF (B)	timepointyr2:FeedERUSF (B)	0.683315	-0.04225	0.24407	0.003563	0.076529	0.003563	0.055388		abundance	439	439	pathways
PWY-5138	timepoint	yr2	timepointyr2	-1.3581	-0.52356	0.281057	0.003527	0.076529	0.007042	0.092122		abundance	439	423	pathways
PWY-5415	Feed	Local RUSF (A)	FeedLocal RUSF (A)	0.927088	0.071838	0.290079	0.003578	0.076529	0.007143	0.092534		abundance	439	290	pathways
PWY-5913	timepoint	yr2	timepointyr2	-1.08798	-0.52356	0.188117	0.003726	0.079275	0.007438	0.095388		abundance	439	437	pathways
PWY-7942	timepoint	yr2	timepointyr2	-1.39398	-0.52356	0.295453	0.003791	0.079824	0.007567	0.096568		abundance	439	407	pathways
VALSYN-PWY	Feed	ERUSF (B)	FeedERUSF (B)	0.086046	-0.04231	0.038664	0.003777	0.079824	0.003777	0.05725		abundance	439	439	pathways
PWY-3801	timepoint	yr2	timepointyr2	0.801403	-0.52356	0.444885	0.003842	0.080487	0.007669	0.097387		abundance	439	154	pathways
PWY0-42	timepoint	yr2	timepointyr2	-1.33792	-0.52356	0.277743	0.003895	0.081171	0.007774	0.098233		abundance	439	429	pathways
GLYCOCAT-PWY	timepoint	yr2	timepointyr2	-1.08581	-0.52356	0.18988	0.003994	0.082813	0.003994	0.059383		abundance	439	439	pathways
PWY-6690	timepoint	yr2	timepointyr2	-1.50036	-0.52356	0.33421	0.004062	0.083806	0.008108	0.101951		abundance	439	407	pathways
HCAMHPDEG-PWY	timepoint	yr2	timepointyr2	-1.50036	-0.52356	0.33421	0.004089	0.083923	0.008161	0.102109		abundance	439	407	pathways
PWY-5022	timepoint	yr2	timepointyr2	-1.43423	-0.52356	0.311466	0.004167	0.08491	0.008316	0.103552		abundance	439	329	pathways
PWY-5989	timepoint	yr2	timepointyr2	-1.0125	-0.52356	0.165376	0.004179	0.08491	0.004179	0.061247		abundance	439	439	pathways
PWY-5030	Feed	Local RUSF (A)	FeedLocal RUSF (A)	-0.90845	0.071838	0.340255	0.004289	0.086724	0.00856	0.106071		abundance	439	388	pathways
PANTO-PWY	timepoint	yr2:FeedLocal RUSF (A)	timepointyr2:FeedLocal RUSF (A)	0.121181	-0.11513	0.076981	0.004371	0.087935	0.004371	0.062983		abundance	439	439	pathways
PWY490-3	timepoint	yr2	timepointyr2	0.944648	0	0.332915	0.004547	0.091026	0.009073	0.111795		prevalence	439	291	pathways
PWY-7731	Feed	Local RUSF (A)	FeedLocal RUSF (A)	-4.05426	0.071838	1.32411	0.004573	0.091093	0.009124	0.111795		abundance	439	31	pathways
PWY-101	Feed	Local RUSF (A)	FeedLocal RUSF (A)	-4.06909	0.071838	1.33412	0.004699	0.093161	0.009377	0.112914		abundance	439	31	pathways
AST-PWY	timepoint	yr2	timepointyr2	-1.46651	-0.52356	0.328933	0.004841	0.094857	0.009659	0.114493		abundance	439	413	pathways
PWY-5088	timepoint	yr2	timepointyr2	-0.92773	0	0.329389	0.004855	0.094857	0.009686	0.114493		prevalence	439	224	pathways
PWY-6471	timepoint	yr2	timepointyr2	-0.92773	0	0.329389	0.004855	0.094857	0.009686	0.114493		prevalence	439	151	pathways
PWY0-1297	timepoint	yr2	timepointyr2	-1.06001	-0.52356	0.187084	0.005199	0.101104	0.005199	0.073279		abundance	439	439	pathways
GLUDEG-I-PWY	timepoint	yr2	timepointyr2	-1.30045	-0.52356	0.272851	0.005283	0.101893	0.010539	0.124003		abundance	439	425	pathways
GLYCOGENSYNTH-PWY	Feed	ERUSF (B)	FeedERUSF (B)	0.141807	-0.04231	0.061852	0.00529	0.101893	0.00529	0.07415		abundance	439	439	pathways
ILEUSYN-PWY	Feed	ERUSF (B)	FeedERUSF (B)	0.092724	-0.04231	0.043156	0.005372	0.102976	0.005372	0.074884		abundance	439	439	pathways
PWY-7199	Feed	ERUSF (B)	FeedERUSF (B)	0.175181	-0.04231	0.074827	0.005476	0.103504	0.005476	0.07592		abundance	439	439	pathways
PWY-7209	timepoint	yr2	timepointyr2	-1.13906	-0.52356	0.216895	0.005471	0.103504	0.010911	0.127216		abundance	439	431	pathways
CARNMET-PWY	timepoint	yr2	timepointyr2	-0.969	0	0.348677	0.005451	0.103504	0.010873	0.127216		prevalence	439	334	pathways
PWY-5659	timepoint	yr2	timepointyr2	-0.14803	-0.52356	0.128968	0.005793	0.10814	0.005793	0.079462		abundance	439	439	pathways
PWY-7807	timepoint	yr2	timepointyr2	-0.94999	0	0.344534	0.005827	0.10814	0.011621	0.131893		prevalence	439	333	pathways
PWY0-1221	timepoint	yr2	timepointyr2	-0.94999	0	0.344534	0.005827	0.10814	0.011621	0.131893		prevalence	439	365	pathways
PWY0-1533	timepoint	yr2	timepointyr2	-0.94999	0	0.344534	0.005827	0.10814	0.011621	0.131893		prevalence	439	334	pathways
PWY0-166	timepoint	yr2	timepointyr2	-1.26235	-0.52356	0.263457	0.005987	0.110602	0.011939	0.134311		abundance	439	423	pathways
ORNDEG-PWY	timepoint	yr2	timepointyr2	-1.14914	-0.52356	0.222704	0.006116	0.111961	0.012195	0.136589		abundance	439	430	pathways
PWY-7761	timepoint	yr2	timepointyr2	-0.26216	-0.52356	0.086455	0.006091	0.111961	0.006091	0.083106		abundance	439	439	pathways
UDPNACETYLGALSYN-PWY	timepoint	yr2	timepointyr2	-0.9318	0	0.340576	0.00622	0.113358	0.012402	0.138306		prevalence	439	149	pathways
PWY-6961	timepoint	yr2	timepointyr2	-1.38685	-0.52356	0.310966	0.006416	0.116409	0.012791	0.141091		abundance	439	423	pathways
PWY-7664	timepoint	yr2	timepointyr2	-0.99694	-0.52356	0.167476	0.006451	0.11652	0.006451	0.086182		abundance	439	439	pathways
BRANCHED-CHAIN-AA-SYN-PWY	Feed	ERUSF (B)	FeedERUSF (B)	0.089081	-0.04231	0.04377	0.007345	0.132086	0.007345	0.094677		abundance	439	439	pathways
PWY-7396	timepoint	yr2:FeedERUSF (B)	timepointyr2:FeedERUSF (B)	-1.51872	-0.04225	0.538395	0.007636	0.136717	0.015215	0.163287		abundance	439	147	pathways
PWY-5972	timepoint	yr2:FeedERUSF (B)	timepointyr2:FeedERUSF (B)	-1.11498	-0.04225	0.396055	0.007701	0.137268	0.015343	0.163977		abundance	439	246	pathways
PWY-6748	timepoint	yr2:FeedERUSF (B)	timepointyr2:FeedERUSF (B)	-4.03926	-0.04225	1.38159	0.007769	0.137872	0.015477	0.164728		abundance	439	35	pathways
GLYCOL-GLYOXDEG-PWY	timepoint	yr2	timepointyr2	-1.38696	-0.52356	0.319638	0.007908	0.139728	0.015753	0.16697		abundance	439	412	pathways
PWY-7384	timepoint	yr2	timepointyr2	-1.39052	-0.52356	0.323912	0.008531	0.149434	0.016989	0.178589		abundance	439	335	pathways
PWY-7874	timepoint	yr2	timepointyr2	-0.91766	0	0.348739	0.008504	0.149434	0.016936	0.178589		prevalence	439	342	pathways
PWY-5130	timepoint	yr2:FeedERUSF (B)	timepointyr2:FeedERUSF (B)	0.963368	-0.04225	0.378246	0.008709	0.151909	0.017343	0.181569		abundance	439	411	pathways
PWY-5103	Feed	ERUSF (B)	FeedERUSF (B)	0.094957	-0.04231	0.047794	0.009153	0.158962	0.009153	0.111795		abundance	439	439	pathways
UNMAPPED	Feed	Local RUSF (A)	FeedLocal RUSF (A)	-0.13729	0.071838	0.075911	0.009289	0.160633	0.009289	0.112914		abundance	439	439	pathways
PWY-2941	timepoint	yr2:FeedERUSF (B)	timepointyr2:FeedERUSF (B)	0.507876	-0.04225	0.207236	0.009376	0.161455	0.009376	0.112914		abundance	439	439	pathways
FASYN-ELONG-PWY	timepoint	yr2	timepointyr2	-0.96461	-0.52356	0.164047	0.009472	0.162418	0.009472	0.113528		abundance	439	439	pathways
ALLANTOINDEG-PWY	timepoint	yr2	timepointyr2	0.88244	0	0.340758	0.009608	0.164059	0.000169	0.00394		prevalence	439	315	pathways
PWY-5861	timepoint	yr2	timepointyr2	-1.10039	-0.52356	0.218139	0.009784	0.166364	0.019472	0.203028		abundance	439	425	pathways
PWY-6748	Feed	ERUSF (B)	FeedERUSF (B)	3.7286	-0.04231	1.36242	0.010066	0.170444	0.02003	0.207164		abundance	439	35	pathways
POLYISOPRENSYN-PWY	timepoint	yr2	timepointyr2	-1.0757	-0.52356	0.210472	0.010573	0.178298	0.021035	0.216683		abundance	439	438	pathways
PWY-5130	Feed	ERUSF (B)	FeedERUSF (B)	-0.75241	-0.04231	0.275782	0.010652	0.178878	0.02119	0.217408		abundance	439	411	pathways
P125-PWY	timepoint	yr2	timepointyr2	-0.85005	0	0.333433	0.010791	0.178997	0.021465	0.217623		prevalence	439	322	pathways
PWY-5910	timepoint	yr2	timepointyr2	-0.85005	0	0.333433	0.010791	0.178997	0.021465	0.217623		prevalence	439	341	pathways
PWY-7873	timepoint	yr2	timepointyr2	-0.85005	0	0.333433	0.010791	0.178997	0.021465	0.217623		prevalence	439	303	pathways
PWY-5189	timepoint	yr2	timepointyr2	-1.22711	-0.52356	0.272639	0.010987	0.181512	0.021854	0.220688		abundance	439	432	pathways
PANTOSYN-PWY	timepoint	yr2:FeedLocal RUSF (A)	timepointyr2:FeedLocal RUSF (A)	0.100907	-0.11513	0.080052	0.01129	0.184352	0.01129	0.130442		abundance	439	439	pathways
PWY-6210	timepoint	yr2:FeedERUSF (B)	timepointyr2:FeedERUSF (B)	-2.51526	-0.04225	0.952685	0.011312	0.184352	0.022497	0.225405		abundance	439	123	pathways
PWY0-1586	Feed	ERUSF (B)	FeedERUSF (B)	0.137369	-0.04231	0.06738	0.011298	0.184352	0.011298	0.130442		abundance	439	439	pathways
TRNA-CHARGING-PWY	Feed	ERUSF (B)	FeedERUSF (B)	0.084083	-0.04231	0.044784	0.011341	0.184352	0.011341	0.130442		abundance	439	439	pathways
PWY-5130	timepoint	yr2:FeedLocal RUSF (A)	timepointyr2:FeedLocal RUSF (A)	0.85692	-0.11513	0.380104	0.011452	0.184685	0.022772	0.226403		abundance	439	411	pathways
PWY-7184	timepoint	yr2	timepointyr2	-1.2119	-0.52356	0.267075	0.011452	0.184685	0.022773	0.226403		abundance	439	430	pathways
UNINTEGRATED	Feed	ERUSF (B)	FeedERUSF (B)	0.030198	-0.04231	0.018929	0.011744	0.188651	0.011744	0.132705		abundance	439	439	pathways
P164-PWY	Feed	Local RUSF (A)	FeedLocal RUSF (A)	-0.44052	0.071838	0.201882	0.012104	0.19297	0.024061	0.235643		abundance	439	413	pathways
PWY-8131	timepoint	yr2	timepointyr2	0.100288	-0.52356	0.243438	0.012108	0.19297	0.02407	0.235643		abundance	439	423	pathways
P185-PWY	timepoint	yr2	timepointyr2	0.285674	-0.52356	0.318488	0.012329	0.194274	0.024507	0.237282		abundance	439	401	pathways
PWY-5514	timepoint	yr2	timepointyr2	-0.88349	0	0.353049	0.012333	0.194274	0.024515	0.237282		prevalence	439	121	pathways
PWY-7446	timepoint	yr2	timepointyr2	-0.88349	0	0.353049	0.012333	0.194274	0.024515	0.237282		prevalence	439	374	pathways
1CMET2-PWY	timepoint	yr2:FeedLocal RUSF (A)	timepointyr2:FeedLocal RUSF (A)	0.053579	-0.11513	0.061334	0.012714	0.198733	0.012714	0.141091		abundance	439	439	pathways
PWY-6318	timepoint	yr2	timepointyr2	-0.80602	0	0.323469	0.012709	0.198733	0.025257	0.24355		prevalence	439	282	pathways
HEMESYN2-PWY	timepoint	yr2	timepointyr2	-1.01601	-0.52356	0.192197	0.012816	0.199563	0.012816	0.141091		abundance	439	439	pathways
CALVIN-PWY	Feed	ERUSF (B)	FeedERUSF (B)	0.054329	-0.04231	0.032323	0.013081	0.2029	0.013081	0.143384		abundance	439	439	pathways
UNMAPPED	timepoint	yr2:FeedLocal RUSF (A)	timepointyr2:FeedLocal RUSF (A)	0.145317	-0.11513	0.100539	0.013176	0.2036	0.013176	0.143813		abundance	439	439	pathways
PWY-6435	timepoint	yr2	timepointyr2	-1.24438	-0.52356	0.28627	0.013456	0.207142	0.026731	0.256799		abundance	439	390	pathways
PWY-5845	timepoint	yr2	timepointyr2	-1.07652	-0.52356	0.219003	0.013574	0.208167	0.026964	0.258065		abundance	439	409	pathways
PWY-6606	timepoint	yr2	timepointyr2	-0.97535	-0.52356	0.178629	0.0141	0.215418	0.0141	0.153245		abundance	439	439	pathways
PWY-5654	timepoint	yr2:FeedERUSF (B)	timepointyr2:FeedERUSF (B)	-2.44227	-0.04225	0.957513	0.014366	0.218672	0.028527	0.270003		abundance	439	122	pathways
PWY-7783	timepoint	yr2:FeedERUSF (B)	timepointyr2:FeedERUSF (B)	-3.05666	-0.04225	0.980426	0.014672	0.220846	0.029129	0.272689		abundance	439	38	pathways
RIBOSYN2-PWY	timepoint	yr2:FeedLocal RUSF (A)	timepointyr2:FeedLocal RUSF (A)	0.139596	-0.11513	0.100002	0.014597	0.220846	0.014597	0.157979		abundance	439	439	pathways
LPSSYN-PWY	timepoint	yr2	timepointyr2	-0.83254	0	0.340982	0.014623	0.220846	0.029031	0.272689		prevalence	439	342	pathways
FUC-RHAMCAT-PWY	timepoint	yr2	timepointyr2	-1.07705	-0.52356	0.221766	0.014804	0.221999	0.029388	0.27411		abundance	439	434	pathways
PROTOCATECHUATE-ORTHO-CLEAVAGE-PWY	timepoint	yr2	timepointyr2	0.480792	-0.52356	0.405969	0.014978	0.22316	0.029732	0.276311		abundance	439	250	pathways
PWY-7115	timepoint	yr2	timepointyr2	-0.87956	-0.52356	0.140102	0.014991	0.22316	0.014991	0.161561		abundance	439	439	pathways
PWY-561	timepoint	yr2	timepointyr2	-1.19059	-0.52356	0.270467	0.015151	0.224722	0.030073	0.277468		abundance	439	423	pathways
PWY-6803	timepoint	yr2	timepointyr2	-1.26429	-0.52356	0.300777	0.015266	0.2256	0.030298	0.277555		abundance	439	432	pathways
3-HYDROXYPHENYLACETATE-DEGRADATION-PWY	timepoint	yr2	timepointyr2	-0.81695	0	0.337292	0.015432	0.227232	0.030626	0.279559		prevalence	439	328	pathways
PWY-5121	timepoint	yr2	timepointyr2	-0.06906	-0.52356	0.182719	0.015736	0.230872	0.031225	0.284011		abundance	439	438	pathways
CITRULBIO-PWY	timepoint	yr2	timepointyr2	-1.12511	-0.52356	0.245281	0.016241	0.236994	0.032219	0.291501		abundance	439	434	pathways
P105-PWY	timepoint	yr2	timepointyr2	-1.17722	-0.52356	0.267639	0.01627	0.236994	0.032275	0.291501		abundance	439	428	pathways
PWY-5860	timepoint	yr2	timepointyr2	-1.15504	-0.52356	0.258327	0.016396	0.237135	0.032524	0.291693		abundance	439	392	pathways
PWY-5981	Feed	Local RUSF (A)	FeedLocal RUSF (A)	0.696068	0.071838	0.257869	0.016378	0.237135	0.032489	0.291693		abundance	439	431	pathways
NAD-BIOSYNTHESIS-II	Feed	Local RUSF (A)	FeedLocal RUSF (A)	0.660632	0.071838	0.244756	0.017119	0.244112	0.033945	0.298182		abundance	439	428	pathways
PWY-5692	timepoint	yr2	timepointyr2	-0.78757	0	0.330335	0.017118	0.244112	0.033942	0.298182		prevalence	439	317	pathways
PWY-7409	timepoint	yr2	timepointyr2	-0.78757	0	0.330335	0.017118	0.244112	0.033942	0.298182		prevalence	439	253	pathways
URDEGR-PWY	timepoint	yr2	timepointyr2	-0.78757	0	0.330335	0.017118	0.244112	0.033942	0.298182		prevalence	439	317	pathways
PWY-6590	timepoint	yr2	timepointyr2	0.02816	-0.52356	0.228566	0.017529	0.249084	0.034751	0.304218		abundance	439	413	pathways
CENTFERM-PWY	timepoint	yr2	timepointyr2	0.03834	-0.52356	0.232745	0.017627	0.249597	0.034942	0.304855		abundance	439	413	pathways
AEROBACTINSYN-PWY	timepoint	yr2	timepointyr2	-0.77372	0	0.327048	0.017992	0.253892	0.035661	0.310069		prevalence	439	266	pathways
HISDEG-PWY	timepoint	yr2:FeedLocal RUSF (A)	timepointyr2:FeedLocal RUSF (A)	0.700066	-0.11513	0.341554	0.018118	0.254785	0.035908	0.311166		abundance	439	435	pathways
DENITRIFICATION-PWY	timepoint	yr2	timepointyr2	0.760381	0	0.323878	0.018888	0.264687	0.037419	0.32316		prevalence	439	219	pathways
PWY-5656	timepoint	yr2	timepointyr2	-1.26531	-0.52356	0.313883	0.019352	0.270258	0.038329	0.328295		abundance	439	408	pathways
PWY0-862	timepoint	yr2	timepointyr2	-0.92086	-0.52356	0.164971	0.019679	0.272629	0.019679	0.204356		abundance	439	439	pathways
GLYCOLYSIS-TCA-GLYOX-BYPASS	timepoint	yr2	timepointyr2	-0.81329	0	0.349006	0.01979	0.272629	0.039188	0.331739		prevalence	439	377	pathways
PWY-7269	timepoint	yr2	timepointyr2	-0.81329	0	0.349006	0.01979	0.272629	0.039188	0.331739		prevalence	439	373	pathways
PWY-7371	timepoint	yr2	timepointyr2	0.813293	0	0.349006	0.01979	0.272629	0.039188	0.331739		prevalence	439	359	pathways
PWY-6210	timepoint	yr2:FeedLocal RUSF (A)	timepointyr2:FeedLocal RUSF (A)	-2.21652	-0.11513	0.884802	0.020023	0.27491	0.039645	0.334505		abundance	439	123	pathways
PWY-5654	timepoint	yr2:FeedLocal RUSF (A)	timepointyr2:FeedLocal RUSF (A)	-2.21551	-0.11513	0.890015	0.020871	0.285582	0.041305	0.342876		abundance	439	122	pathways
PWY-6992	timepoint	yr2	timepointyr2	-1.33313	-0.52356	0.348112	0.021308	0.290596	0.042163	0.347742		abundance	439	382	pathways
HEME-BIOSYNTHESIS-II	timepoint	yr2	timepointyr2	-0.97117	-0.52356	0.190562	0.022416	0.303663	0.022416	0.225405		abundance	439	439	pathways
PWY-5030	timepoint	yr2:FeedLocal RUSF (A)	timepointyr2:FeedLocal RUSF (A)	0.967412	-0.11513	0.469533	0.022379	0.303663	0.044258	0.358111		abundance	439	388	pathways
ASPASN-PWY	Feed	ERUSF (B)	FeedERUSF (B)	0.093072	-0.04231	0.05527	0.022954	0.30846	0.022954	0.22732		abundance	439	439	pathways
P164-PWY	timepoint	yr2:FeedLocal RUSF (A)	timepointyr2:FeedLocal RUSF (A)	0.536211	-0.11513	0.283363	0.02312	0.30846	0.045705	0.362294		abundance	439	413	pathways
PWY-6902	timepoint	yr2	timepointyr2	-1.06243	-0.52356	0.232245	0.02315	0.30846	0.045763	0.362294		abundance	439	437	pathways
PWY-7340	timepoint	yr2:FeedERUSF (B)	timepointyr2:FeedERUSF (B)	-0.98065	-0.04225	0.407761	0.02297	0.30846	0.045411	0.362294		abundance	439	263	pathways
PWY-7384	timepoint	yr2	timepointyr2	-0.76742	0	0.337606	0.023019	0.30846	0.016989	0.178589		prevalence	439	335	pathways
PWY-5920	timepoint	yr2	timepointyr2	-1.14701	-0.52356	0.271447	0.023923	0.316692	0.047274	0.370821		abundance	439	416	pathways
PWY-7345	timepoint	yr2	timepointyr2	-0.79408	-0.52356	0.112205	0.023848	0.316692	0.023848	0.235274		abundance	439	439	pathways
PWY-5855	timepoint	yr2	timepointyr2	-1.20266	-0.52356	0.296736	0.024142	0.317539	0.047701	0.37192		abundance	439	415	pathways
PWY-922	timepoint	yr2	timepointyr2	-0.75334	0	0.3341	0.024144	0.317539	0.047704	0.37192		prevalence	439	350	pathways
TCA-GLYOX-BYPASS	timepoint	yr2	timepointyr2	-1.15147	-0.52356	0.276198	0.025253	0.330497	0.049868	0.385858		abundance	439	422	pathways
P621-PWY	timepoint	yr2	timepointyr2	-0.7398	0	0.330723	0.025292	0.330497	0.049943	0.385858		prevalence	439	319	pathways
DARABCATK12-PWY	timepoint	yr2	timepointyr2	-0.80908	0	0.362006	0.025418	0.331083	0.05019	0.386595		prevalence	439	402	pathways
URSIN-PWY	timepoint	yr2	timepointyr2	0.677419	-0.52356	0.526962	0.025698	0.333664	0.050736	0.388251		abundance	439	122	pathways
GLUCOSE1PMETAB-PWY	Feed	ERUSF (B)	FeedERUSF (B)	0.124637	-0.04231	0.071683	0.026337	0.340875	0.051981	0.395641		abundance	439	435	pathways
PROPFERM-PWY	timepoint	yr2	timepointyr2	0.792054	0	0.357551	0.026745	0.341797	0.052775	0.39679		prevalence	439	52	pathways
PWY-5494	timepoint	yr2	timepointyr2	0.792054	0	0.357551	0.026745	0.341797	0.052775	0.39679		prevalence	439	53	pathways
PWY-8188	timepoint	yr2	timepointyr2	0.792054	0	0.357551	0.026745	0.341797	0.052775	0.39679		prevalence	439	52	pathways
PWY-8189	timepoint	yr2	timepointyr2	0.792054	0	0.357551	0.026745	0.341797	0.052775	0.39679		prevalence	439	52	pathways
PWY-8178	Feed	ERUSF (B)	FeedERUSF (B)	0.089101	-0.04231	0.055417	0.027304	0.347854	0.027304	0.260357		abundance	439	439	pathways
PWY-3801	timepoint	yr2:FeedERUSF (B)	timepointyr2:FeedERUSF (B)	-1.47939	-0.04225	0.641385	0.027565	0.350076	0.05437	0.404949		abundance	439	154	pathways
PWY-5941	timepoint	yr2	timepointyr2	-0.32181	-0.52356	0.082666	0.028086	0.352488	0.028086	0.266813		abundance	439	439	pathways
DENOVOPURINE2-PWY	timepoint	yr2	timepointyr2	-0.77579	0	0.353296	0.028102	0.352488	0.055414	0.404949		prevalence	439	401	pathways
PRPP-PWY	timepoint	yr2	timepointyr2	-0.77579	0	0.353296	0.028102	0.352488	0.055414	0.404949		prevalence	439	400	pathways
PWY-7187	timepoint	yr2	timepointyr2	-0.77579	0	0.353296	0.028102	0.352488	0.055414	0.404949		prevalence	439	401	pathways
P221-PWY	timepoint	yr2	timepointyr2	-1.40005	-0.52356	0.395242	0.028542	0.356909	0.05627	0.410033		abundance	439	403	pathways
PWY-6630	timepoint	yr2:FeedERUSF (B)	timepointyr2:FeedERUSF (B)	0.333683	-0.04225	0.167577	0.028855	0.35971	0.028855	0.272104		abundance	439	439	pathways
PWY1G-0	timepoint	yr2:FeedERUSF (B)	timepointyr2:FeedERUSF (B)	-1.06265	-0.04225	0.455609	0.029772	0.370009	0.058657	0.423821		abundance	439	92	pathways
PWY-7229	timepoint	yr2:FeedLocal RUSF (A)	timepointyr2:FeedLocal RUSF (A)	0.078317	-0.11513	0.084096	0.029961	0.37123	0.029961	0.277441		abundance	439	439	pathways
PWY-6126	timepoint	yr2:FeedLocal RUSF (A)	timepointyr2:FeedLocal RUSF (A)	0.10851	-0.11513	0.098943	0.030201	0.373061	0.030201	0.277555		abundance	439	439	pathways
PWY-6612	timepoint	yr2	timepointyr2	-0.99107	-0.52356	0.211198	0.030492	0.374377	0.060054	0.43148		abundance	439	433	pathways
PWY-7210	Feed	ERUSF (B)	FeedERUSF (B)	-0.72505	-0.04231	0.31363	0.030483	0.374377	0.060037	0.43148		abundance	439	365	pathways
PWY-7992	timepoint	yr2	timepointyr2	0.745327	0	0.34532	0.030899	0.377103	0.060844	0.432731		prevalence	439	356	pathways
PWY0-41	timepoint	yr2	timepointyr2	-0.74533	0	0.34532	0.030899	0.377103	0.060844	0.432731		prevalence	439	361	pathways
P125-PWY	Feed	Local RUSF (A)	FeedLocal RUSF (A)	0.944457	0.071838	0.403484	0.031554	0.383702	0.062113	0.438711		abundance	439	322	pathways
PWY0-1277	timepoint	yr2	timepointyr2	-1.20168	-0.52356	0.311557	0.031629	0.383702	0.062258	0.438711		abundance	439	404	pathways
PWY-5265	Feed	Local RUSF (A)	FeedLocal RUSF (A)	0.930269	0.071838	0.397671	0.032062	0.387803	0.063097	0.442196		abundance	439	288	pathways
LIPA-CORESYN-PWY	timepoint	yr2	timepointyr2	-0.73104	0	0.341572	0.032337	0.389968	0.063629	0.44471		prevalence	439	351	pathways
PWY-5180	timepoint	yr2	timepointyr2	-1.31336	-0.52356	0.365878	0.033113	0.398136	0.065129	0.453956		abundance	439	279	pathways
PWY-2201	timepoint	yr2	timepointyr2	0.614803	-0.52356	0.367559	0.033491	0.400177	0.065859	0.456566		abundance	439	48	pathways
PWY-5898	timepoint	yr2	timepointyr2	-0.94464	-0.52356	0.193469	0.033607	0.400177	0.066085	0.456894		abundance	439	428	pathways
PWY-7238	timepoint	yr2	timepointyr2	-0.30535	-0.52356	0.094987	0.033676	0.400177	0.033676	0.298182		abundance	439	439	pathways
PWY-7977	Feed	Local RUSF (A)	FeedLocal RUSF (A)	-0.06751	0.071838	0.06074	0.033452	0.400177	0.033452	0.298182		abundance	439	439	pathways
PWY-5897	timepoint	yr2	timepointyr2	-0.94464	-0.52356	0.193469	0.034002	0.401698	0.066848	0.458461		abundance	439	428	pathways
PWY-5899	timepoint	yr2	timepointyr2	-0.94464	-0.52356	0.193469	0.033912	0.401698	0.066674	0.458461		abundance	439	428	pathways
PWY-7165	timepoint	yr2:FeedERUSF (B)	timepointyr2:FeedERUSF (B)	-1.31984	-0.04225	0.595923	0.0352	0.414384	0.069161	0.468806		abundance	439	174	pathways
PWY-7883	Feed	Local RUSF (A)	FeedLocal RUSF (A)	0.496029	0.071838	0.199299	0.03528	0.414384	0.069315	0.468806		abundance	439	435	pathways
PWY66-391	Feed	ERUSF (B)	FeedERUSF (B)	0.556925	-0.04231	0.282857	0.035508	0.415864	0.069755	0.469613		abundance	439	277	pathways
PWY-5692	timepoint	yr2	timepointyr2	-1.25597	-0.52356	0.3442	0.035746	0.416257	0.033942	0.298182		abundance	439	317	pathways
URDEGR-PWY	timepoint	yr2	timepointyr2	-1.25597	-0.52356	0.3442	0.035667	0.416257	0.033942	0.298182		abundance	439	317	pathways
PWY-7391	timepoint	yr2:FeedERUSF (B)	timepointyr2:FeedERUSF (B)	0.975473	0	0.467074	0.036755	0.426776	0.072159	0.48205		prevalence	439	110	pathways
P108-PWY	Feed	Local RUSF (A)	FeedLocal RUSF (A)	-0.37855	0.071838	0.213729	0.03687	0.426896	0.072381	0.482227		abundance	439	430	pathways
PWY-5265	timepoint	yr2	timepointyr2	0.317265	-0.52356	0.398903	0.037415	0.429533	0.07343	0.482944		abundance	439	288	pathways
PWY-5747	timepoint	yr2	timepointyr2	-1.10229	-0.52356	0.273425	0.037224	0.429533	0.073063	0.482944		abundance	439	416	pathways
PWY0-1298	timepoint	yr2	timepointyr2	-0.93633	-0.52356	0.193697	0.037392	0.429533	0.073385	0.482944		abundance	439	438	pathways
PWY-6168	timepoint	yr2	timepointyr2	-0.75194	0	0.362083	0.037827	0.431828	0.074224	0.485675		prevalence	439	393	pathways
PWY-6797	timepoint	yr2	timepointyr2	-0.75194	0	0.362083	0.037827	0.431828	0.074224	0.485675		prevalence	439	56	pathways
DAPLYSINESYN-PWY	timepoint	yr2	timepointyr2	-0.77464	-0.52356	0.113518	0.038118	0.433925	0.038118	0.328096		abundance	439	439	pathways
PWY-841	timepoint	yr2:FeedLocal RUSF (A)	timepointyr2:FeedLocal RUSF (A)	0.057828	-0.11513	0.078335	0.038397	0.435882	0.038397	0.328295		abundance	439	439	pathways
NAD-BIOSYNTHESIS-II	timepoint	yr2:FeedLocal RUSF (A)	timepointyr2:FeedLocal RUSF (A)	-0.84587	-0.11513	0.350803	0.038906	0.440426	0.076298	0.494129		abundance	439	428	pathways
PWY-5178	Feed	ERUSF (B)	FeedERUSF (B)	2.41954	-0.04231	1.11967	0.039284	0.443477	0.077025	0.496408		abundance	439	27	pathways
FASYN-INITIAL-PWY	timepoint	yr2	timepointyr2	-0.73613	0	0.357706	0.039598	0.444549	1.02e-07	3.5e-06		prevalence	439	386	pathways
PWY-5705	timepoint	yr2	timepointyr2	-0.73613	0	0.357706	0.039598	0.444549	0.077628	0.498323		prevalence	439	389	pathways
GLUTORN-PWY	Feed	ERUSF (B)	FeedERUSF (B)	0.09314	-0.04231	0.062375	0.040057	0.448461	0.040057	0.336872		abundance	439	439	pathways
P621-PWY	Feed	Local RUSF (A)	FeedLocal RUSF (A)	0.618848	0.071838	0.264793	0.040414	0.450654	0.079194	0.503198		abundance	439	319	pathways
PWY1G-0	timepoint	yr2:FeedLocal RUSF (A)	timepointyr2:FeedLocal RUSF (A)	-1.10683	-0.11513	0.468299	0.040475	0.450654	0.079311	0.503198		abundance	439	92	pathways
PWY-6125	timepoint	yr2:FeedLocal RUSF (A)	timepointyr2:FeedLocal RUSF (A)	0.115937	-0.11513	0.108946	0.041082	0.452928	0.041082	0.342524		abundance	439	439	pathways
PWY-6168	timepoint	yr2	timepointyr2	-1.02955	-0.52356	0.243397	0.041232	0.452928	0.074224	0.485675		abundance	439	393	pathways
PWY-6748	timepoint	yr2	timepointyr2	1.55969	-0.52356	0.675744	0.041236	0.452928	0.080772	0.510295		abundance	439	35	pathways
PWY-7220	timepoint	yr2:FeedLocal RUSF (A)	timepointyr2:FeedLocal RUSF (A)	0.155806	-0.11513	0.128668	0.04113	0.452928	0.04113	0.342524		abundance	439	439	pathways
PWY-7222	timepoint	yr2:FeedLocal RUSF (A)	timepointyr2:FeedLocal RUSF (A)	0.155806	-0.11513	0.128668	0.041068	0.452928	0.041068	0.342524		abundance	439	439	pathways
PWY66-430	timepoint	yr2	timepointyr2	-0.72101	0	0.353518	0.041397	0.453468	0.08108	0.51044		prevalence	439	372	pathways
DHGLUCONATE-PYR-CAT-PWY	timepoint	yr2	timepointyr2	0.811735	-0.52356	0.642134	0.041975	0.454895	0.082188	0.51044		abundance	439	68	pathways
PWY-5896	timepoint	yr2	timepointyr2	-1.01122	-0.52356	0.235702	0.041895	0.454895	0.082035	0.51044		abundance	439	396	pathways
PWY-6385	Feed	ERUSF (B)	FeedERUSF (B)	0.06376	-0.04231	0.047649	0.041854	0.454895	0.041854	0.34631		abundance	439	439	pathways
PWY-7434	timepoint	yr2	timepointyr2	0.037599	-0.52356	0.270278	0.041707	0.454895	0.081674	0.51044		abundance	439	257	pathways
FOLSYN-PWY	timepoint	yr2	timepointyr2	-0.93011	-0.52356	0.196164	0.042992	0.459789	0.084136	0.51877		abundance	439	433	pathways
PWY-7228	timepoint	yr2:FeedLocal RUSF (A)	timepointyr2:FeedLocal RUSF (A)	0.094678	-0.11513	0.099093	0.042568	0.459789	0.042568	0.349957		abundance	439	439	pathways
PWY-7977	timepoint	yr2:FeedLocal RUSF (A)	timepointyr2:FeedLocal RUSF (A)	0.073078	-0.11513	0.088263	0.042809	0.459789	0.042809	0.350816		abundance	439	439	pathways
RUMP-PWY	Feed	Local RUSF (A)	FeedLocal RUSF (A)	0.951122	0.071838	0.430361	0.042907	0.459789	0.083973	0.51877		abundance	439	180	pathways
PWY-7165	timepoint	yr2:FeedERUSF (B)	timepointyr2:FeedERUSF (B)	0.931208	0	0.459815	0.042849	0.459789	0.069161	0.468806		prevalence	439	174	pathways
PWY-7242	timepoint	yr2:FeedERUSF (B)	timepointyr2:FeedERUSF (B)	-0.43481	-0.04225	0.19019	0.043437	0.463327	0.043437	0.354827		abundance	439	439	pathways
PWY-5154	Feed	ERUSF (B)	FeedERUSF (B)	0.093652	-0.04231	0.063628	0.043962	0.467701	0.043962	0.357977		abundance	439	439	pathways
PWY-6386	Feed	ERUSF (B)	FeedERUSF (B)	0.069946	-0.04231	0.051211	0.044241	0.469435	0.044241	0.358111		abundance	439	439	pathways
PEPTIDOGLYCANSYN-PWY	Feed	ERUSF (B)	FeedERUSF (B)	0.07186	-0.04231	0.052456	0.044587	0.471881	0.044587	0.359483		abundance	439	439	pathways
PWY0-1241	timepoint	yr2:FeedERUSF (B)	timepointyr2:FeedERUSF (B)	0.365559	-0.04225	0.199261	0.044708	0.471927	0.044708	0.359483		abundance	439	439	pathways
PWY-5850	timepoint	yr2	timepointyr2	-1.01765	-0.52356	0.242157	0.044983	0.4736	0.087942	0.540937		abundance	439	392	pathways
PWY-6507	timepoint	yr2:FeedERUSF (B)	timepointyr2:FeedERUSF (B)	-0.42406	-0.04225	0.186879	0.045139	0.474023	0.045139	0.361821		abundance	439	439	pathways
PWY-6901	timepoint	yr2	timepointyr2	-0.74868	-0.52356	0.105039	0.045607	0.4777	0.045607	0.362294		abundance	439	439	pathways
PWY-6897	Feed	ERUSF (B)	FeedERUSF (B)	0.081569	-0.04231	0.058071	0.045966	0.480218	0.045966	0.362776		abundance	439	439	pathways
P164-PWY	timepoint	yr2:FeedERUSF (B)	timepointyr2:FeedERUSF (B)	0.530456	-0.04225	0.283842	0.046398	0.483487	0.090643	0.553567		abundance	439	413	pathways
UNINTEGRATED	timepoint	yr2:FeedLocal RUSF (A)	timepointyr2:FeedLocal RUSF (A)	-0.03905	-0.11513	0.025909	0.046519	0.483513	0.046519	0.366017		abundance	439	439	pathways
PWY-7210	timepoint	yr2	timepointyr2	-0.67939	0	0.34195	0.046942	0.486662	0.09168	0.555223		prevalence	439	365	pathways
PWY-6182	timepoint	yr2:FeedERUSF (B)	timepointyr2:FeedERUSF (B)	-1.65223	-0.04225	0.800096	0.047221	0.487073	0.092213	0.555223		abundance	439	140	pathways
3-HYDROXYPHENYLACETATE-DEGRADATION-PWY	timepoint	yr2:FeedERUSF (B)	timepointyr2:FeedERUSF (B)	0.916259	0	0.461677	0.047185	0.487073	0.092144	0.555223		prevalence	439	328	pathways
ARGDEG-PWY	timepoint	yr2	timepointyr2	-1.14378	-0.52356	0.310255	0.048324	0.493783	0.094313	0.563039		abundance	439	374	pathways
ORNARGDEG-PWY	timepoint	yr2	timepointyr2	-1.14378	-0.52356	0.310255	0.048452	0.493783	0.094556	0.563039		abundance	439	374	pathways
PWY-5838	timepoint	yr2	timepointyr2	-0.92954	-0.52356	0.201022	0.048479	0.493783	0.094608	0.563039		abundance	439	425	pathways
PWY-6121	Feed	Local RUSF (A)	FeedLocal RUSF (A)	0.185339	0.071838	0.051583	0.048293	0.493783	0.048293	0.375367		abundance	439	439	pathways
PWY0-41	timepoint	yr2	timepointyr2	-1.20802	-0.52356	0.34342	0.048474	0.493783	0.060844	0.432731		abundance	439	361	pathways
PWY-7391	timepoint	yr2	timepointyr2	-0.66663	0	0.338385	0.048834	0.494917	0.095283	0.564438		prevalence	439	110	pathways
PWY-7616	timepoint	yr2	timepointyr2	-0.66663	0	0.338385	0.048834	0.494917	0.095283	0.564438		prevalence	439	366	pathways
PWY-7396	timepoint	yr2	timepointyr2	0.212932	-0.52356	0.366942	0.049319	0.49859	0.096206	0.568591		abundance	439	147	pathways
P108-PWY	timepoint	yr2:FeedLocal RUSF (A)	timepointyr2:FeedLocal RUSF (A)	0.492394	-0.11513	0.307302	0.05004	0.504621	0.097576	0.573026		abundance	439	430	pathways
PPGPPMET-PWY	timepoint	yr2	timepointyr2	-0.06449	-0.52356	0.230523	0.050391	0.505353	0.098242	0.574011		abundance	439	438	pathways
PWY-6147	Feed	ERUSF (B)	FeedERUSF (B)	0.146739	-0.04231	0.094216	0.050561	0.505353	0.050561	0.388251		abundance	439	439	pathways
PWY-7731	timepoint	yr2:FeedLocal RUSF (A)	timepointyr2:FeedLocal RUSF (A)	3.10383	-0.11513	1.56712	0.050602	0.505353	0.098644	0.574508		abundance	439	31	pathways
PWY-7953	Feed	ERUSF (B)	FeedERUSF (B)	0.071508	-0.04231	0.054196	0.050859	0.505353	0.050859	0.388251		abundance	439	439	pathways
PWY-822	Feed	ERUSF (B)	FeedERUSF (B)	1.12266	-0.04231	0.591146	0.050789	0.505353	0.098999	0.574508		abundance	439	156	pathways
PWY0-1221	timepoint	yr2:FeedERUSF (B)	timepointyr2:FeedERUSF (B)	-1.04252	-0.04225	0.508025	0.050696	0.505353	0.098822	0.574508		abundance	439	365	pathways
KDO-NAGLIPASYN-PWY	timepoint	yr2	timepointyr2	-1.10675	-0.52356	0.295473	0.051407	0.50832	0.100172	0.578696		abundance	439	400	pathways
PWY-6562	timepoint	yr2:FeedERUSF (B)	timepointyr2:FeedERUSF (B)	0.915194	0	0.469744	0.051381	0.50832	0.100123	0.578696		prevalence	439	263	pathways
PWY-101	timepoint	yr2:FeedLocal RUSF (A)	timepointyr2:FeedLocal RUSF (A)	3.1123	-0.11513	1.57897	0.051627	0.509256	0.100589	0.579801		abundance	439	31	pathways
PWY-7688	Feed	Local RUSF (A)	FeedLocal RUSF (A)	-1.04244	0.071838	0.569013	0.052004	0.511733	0.101304	0.582103		abundance	439	179	pathways
PWY-6700	Feed	ERUSF (B)	FeedERUSF (B)	0.117534	-0.04231	0.079593	0.052905	0.519341	0.052905	0.39679		abundance	439	439	pathways
PWY-6920	timepoint	yr2:FeedERUSF (B)	timepointyr2:FeedERUSF (B)	-0.84332	-0.04225	0.409563	0.053207	0.521045	0.103583	0.59306		abundance	439	248	pathways
PWY-7198	timepoint	yr2	timepointyr2	-0.7947	-0.52356	0.13514	0.054002	0.527558	0.054002	0.403834		abundance	439	439	pathways
RUMP-PWY	Feed	ERUSF (B)	FeedERUSF (B)	0.827406	-0.04231	0.44916	0.05468	0.532899	0.10637	0.607658		abundance	439	180	pathways
PWY-3841	Feed	ERUSF (B)	FeedERUSF (B)	0.060145	-0.04231	0.048719	0.054861	0.533387	0.054861	0.404949		abundance	439	439	pathways
GLUCUROCAT-PWY	timepoint	yr2:FeedERUSF (B)	timepointyr2:FeedERUSF (B)	-0.38061	-0.04225	0.172556	0.055242	0.534117	0.055242	0.404949		abundance	439	439	pathways
PWY-7208	timepoint	yr2:FeedLocal RUSF (A)	timepointyr2:FeedLocal RUSF (A)	0.108454	-0.11513	0.112518	0.05533	0.534117	0.05533	0.404949		abundance	439	439	pathways
UDPNAGSYN-PWY	Feed	Local RUSF (A)	FeedLocal RUSF (A)	0.23302	0.071838	0.0802	0.055258	0.534117	0.055258	0.404949		abundance	439	439	pathways
PWY0-1338	timepoint	yr2	timepointyr2	-1.11832	-0.52356	0.307229	0.055694	0.536348	0.108286	0.616739		abundance	439	405	pathways
PWY-5676	timepoint	yr2	timepointyr2	-0.14535	-0.52356	0.193486	0.055923	0.537285	0.108719	0.616955		abundance	439	435	pathways
COA-PWY	timepoint	yr2:FeedERUSF (B)	timepointyr2:FeedERUSF (B)	0.134842	-0.04225	0.086361	0.056677	0.541594	0.056677	0.411352		abundance	439	439	pathways
PWY-5840	timepoint	yr2	timepointyr2	-0.95611	-0.52356	0.223755	0.056628	0.541594	0.11005	0.621757		abundance	439	423	pathways
PWY-7197	timepoint	yr2:FeedLocal RUSF (A)	timepointyr2:FeedLocal RUSF (A)	0.11713	-0.11513	0.118019	0.056771	0.541594	0.056771	0.411352		abundance	439	439	pathways
LIPA-CORESYN-PWY	timepoint	yr2	timepointyr2	-1.23616	-0.52356	0.370075	0.057086	0.543324	0.063629	0.44471		abundance	439	351	pathways
METHGLYUT-PWY	timepoint	yr2	timepointyr2	-1.04146	-0.52356	0.268282	0.057378	0.544705	0.111465	0.626989		abundance	439	413	pathways
PWY-5030	timepoint	yr2	timepointyr2	0.679543	0	0.357942	0.057634	0.544705	0.111946	0.628316		prevalence	439	388	pathways
PWY0-1277	timepoint	yr2	timepointyr2	-0.67954	0	0.357942	0.057634	0.544705	0.062258	0.438711		prevalence	439	404	pathways
PWY-6471	timepoint	yr2	timepointyr2	0.646318	-0.52356	0.60931	0.057943	0.546355	0.009686	0.114493		abundance	439	151	pathways
PWY-7165	timepoint	yr2	timepointyr2	0.259615	-0.52356	0.407309	0.058682	0.550767	0.11392	0.63111		abundance	439	174	pathways
PWY-5415	timepoint	yr2	timepointyr2	-0.60969	0	0.322332	0.058556	0.550767	0.113683	0.63111		prevalence	439	290	pathways
PWY-5104	Feed	ERUSF (B)	FeedERUSF (B)	0.554657	-0.04231	0.314338	0.058866	0.551228	0.114267	0.631673		abundance	439	341	pathways
PWY-6471	timepoint	yr2:FeedERUSF (B)	timepointyr2:FeedERUSF (B)	-1.92347	-0.04225	0.988826	0.059658	0.555607	0.115756	0.635325		abundance	439	151	pathways
PWY-7245	timepoint	yr2:FeedERUSF (B)	timepointyr2:FeedERUSF (B)	-1.60737	-0.04225	0.809877	0.059652	0.555607	0.115746	0.635325		abundance	439	98	pathways
PWY-7688	timepoint	yr2:FeedERUSF (B)	timepointyr2:FeedERUSF (B)	1.42328	-0.04225	0.771088	0.059744	0.555607	0.115919	0.635325		abundance	439	179	pathways
ECASYN-PWY	timepoint	yr2	timepointyr2	-0.66558	0	0.353816	0.059951	0.556258	0.116308	0.636098		prevalence	439	397	pathways
PWY-6969	timepoint	yr2	timepointyr2	-0.2238	-0.52356	0.154015	0.06065	0.561463	0.06065	0.432731		abundance	439	439	pathways
PANTO-PWY	Feed	Local RUSF (A)	FeedLocal RUSF (A)	-0.04373	0.071838	0.056352	0.060903	0.562521	0.060903	0.432731		abundance	439	439	pathways
PWY-5004	timepoint	yr2:FeedLocal RUSF (A)	timepointyr2:FeedLocal RUSF (A)	0.793568	-0.11513	0.477159	0.061188	0.563154	0.118632	0.64258		abundance	439	127	pathways
PWY-5972	Feed	ERUSF (B)	FeedERUSF (B)	0.457454	-0.04231	0.26511	0.061249	0.563154	0.118746	0.64258		abundance	439	246	pathways
THISYNARA-PWY	timepoint	yr2	timepointyr2	-0.28336	-0.52356	0.122348	0.061809	0.567023	0.061809	0.437955		abundance	439	439	pathways
PWY-6565	timepoint	yr2:FeedERUSF (B)	timepointyr2:FeedERUSF (B)	0.904376	0	0.4846	0.062009	0.567576	0.120172	0.648931		prevalence	439	83	pathways
PWY-6396	timepoint	yr2:FeedERUSF (B)	timepointyr2:FeedERUSF (B)	0.847765	0	0.454514	0.062152	0.567608	0.120441	0.649015		prevalence	439	236	pathways
PWY-5531	Feed	Local RUSF (A)	FeedLocal RUSF (A)	2.12099	0.071838	0.988904	0.062587	0.5703	0.121257	0.652042		abundance	439	16	pathways
PWY-6387	Feed	ERUSF (B)	FeedERUSF (B)	0.062459	-0.04231	0.051866	0.062771	0.570697	0.062771	0.441117		abundance	439	439	pathways
HISDEG-PWY	Feed	Local RUSF (A)	FeedLocal RUSF (A)	-0.38986	0.071838	0.247443	0.06396	0.580205	0.123828	0.660332		abundance	439	435	pathways
PWY-6215	timepoint	yr2:FeedLocal RUSF (A)	timepointyr2:FeedLocal RUSF (A)	-1.30014	-0.11513	0.635047	0.064379	0.581201	0.124614	0.660781		abundance	439	186	pathways
ARGDEG-PWY	timepoint	yr2	timepointyr2	-0.63941	0	0.346052	0.064641	0.581201	0.094313	0.563039		prevalence	439	374	pathways
ORNARGDEG-PWY	timepoint	yr2	timepointyr2	-0.63941	0	0.346052	0.064641	0.581201	0.094556	0.563039		prevalence	439	374	pathways
THREOCAT-PWY	timepoint	yr2	timepointyr2	-0.63941	0	0.346052	0.064641	0.581201	0.125104	0.660781		prevalence	439	358	pathways
PWY-8187	Feed	Local RUSF (A)	FeedLocal RUSF (A)	0.371671	0.071838	0.160461	0.065382	0.586558	0.065382	0.454482		abundance	439	439	pathways
PWY-7245	timepoint	yr2	timepointyr2	0.629148	-0.52356	0.61396	0.066455	0.594873	0.128493	0.676767		abundance	439	98	pathways
PWY-7198	timepoint	yr2:FeedERUSF (B)	timepointyr2:FeedERUSF (B)	0.307202	-0.04225	0.187463	0.066628	0.595108	0.066628	0.458461		abundance	439	439	pathways
PWY-5104	timepoint	yr2:FeedERUSF (B)	timepointyr2:FeedERUSF (B)	-0.87253	-0.04225	0.450739	0.067091	0.59663	0.129682	0.680232		abundance	439	341	pathways
PWY-8086	timepoint	yr2	timepointyr2	-0.62712	0	0.342389	0.06701	0.59663	0.006671	0.088373		prevalence	439	356	pathways
PWY-7323	timepoint	yr2:FeedERUSF (B)	timepointyr2:FeedERUSF (B)	-0.45019	-0.04225	0.219531	0.067444	0.598458	0.067444	0.461319		abundance	439	439	pathways
CARNMET-PWY	timepoint	yr2	timepointyr2	-1.18084	-0.52356	0.356682	0.068357	0.602611	0.010873	0.127216		abundance	439	334	pathways
PWY-6953	Feed	Local RUSF (A)	FeedLocal RUSF (A)	-1.14145	0.071838	0.657827	0.06821	0.602611	0.131768	0.686961		abundance	439	109	pathways
PWY-7254	timepoint	yr2:FeedERUSF (B)	timepointyr2:FeedERUSF (B)	0.802965	-0.04225	0.45954	0.06811	0.602611	0.13158	0.686961		abundance	439	334	pathways
THRESYN-PWY	timepoint	yr2	timepointyr2	-0.38823	-0.52356	0.063244	0.068665	0.604015	0.068665	0.46842		abundance	439	439	pathways
GLYCOGENSYNTH-PWY	Feed	Local RUSF (A)	FeedLocal RUSF (A)	0.193015	0.071838	0.061851	0.069453	0.608099	0.069453	0.468806		abundance	439	439	pathways
GLYCOLYSIS	timepoint	yr2	timepointyr2	-0.38148	-0.52356	0.067689	0.069291	0.608099	0.069291	0.468806		abundance	439	439	pathways
PWY-7399	timepoint	yr2	timepointyr2	0.442295	-0.52356	0.518747	0.069578	0.608099	0.134315	0.697572		abundance	439	53	pathways
NONOXIPENT-PWY	Feed	ERUSF (B)	FeedERUSF (B)	0.091167	-0.04231	0.070857	0.071406	0.622736	0.071406	0.479468		abundance	439	439	pathways
PWY-7383	timepoint	yr2	timepointyr2	0.603974	0	0.335453	0.071786	0.623374	9.05e-07	2.75e-05		prevalence	439	344	pathways
PWY66-399	timepoint	yr2	timepointyr2	0.603974	0	0.335453	0.071786	0.623374	9.25e-07	2.76e-05		prevalence	439	344	pathways
PWY-6936	Feed	ERUSF (B)	FeedERUSF (B)	0.088087	-0.04231	0.069069	0.072166	0.62534	0.072166	0.48205		abundance	439	439	pathways
GALACT-GLUCUROCAT-PWY	timepoint	yr2	timepointyr2	-0.24022	-0.52356	0.152558	0.072772	0.627913	0.140249	0.718041		abundance	439	438	pathways
PWY-6122	Feed	ERUSF (B)	FeedERUSF (B)	0.04845	-0.04231	0.045725	0.072692	0.627913	0.072692	0.482944		abundance	439	439	pathways
PWY-6277	Feed	ERUSF (B)	FeedERUSF (B)	0.04845	-0.04231	0.045725	0.073034	0.628834	0.073034	0.482944		abundance	439	439	pathways
PWY-8190	timepoint	yr2	timepointyr2	0.593058	0	0.332163	0.07419	0.637436	0.142876	0.729976		prevalence	439	143	pathways
PWY-5415	Feed	ERUSF (B)	FeedERUSF (B)	0.48926	-0.04231	0.29714	0.075299	0.640202	0.144929	0.734669		abundance	439	290	pathways
PWY-5941	Feed	ERUSF (B)	FeedERUSF (B)	0.103478	-0.04231	0.078913	0.075237	0.640202	0.075237	0.488885		abundance	439	439	pathways
PWY-6920	Feed	ERUSF (B)	FeedERUSF (B)	0.517086	-0.04231	0.312143	0.074997	0.640202	0.144369	0.733281		abundance	439	248	pathways
PWY-7851	timepoint	yr2:FeedERUSF (B)	timepointyr2:FeedERUSF (B)	0.12814	-0.04225	0.089711	0.075263	0.640202	0.075263	0.488885		abundance	439	439	pathways
SER-GLYSYN-PWY	timepoint	yr2	timepointyr2	-0.37977	-0.52356	0.070667	0.075286	0.640202	0.075286	0.488885		abundance	439	439	pathways
PWY-5384	Feed	Local RUSF (A)	FeedLocal RUSF (A)	0.328721	0.071838	0.142619	0.076479	0.647214	0.076479	0.494129		abundance	439	439	pathways
PWY-7165	timepoint	yr2:FeedLocal RUSF (A)	timepointyr2:FeedLocal RUSF (A)	-1.0865	-0.11513	0.540882	0.076479	0.647214	0.147109	0.742785		abundance	439	174	pathways
PWY-7434	timepoint	yr2	timepointyr2	-0.58255	0	0.328982	0.076602	0.647214	0.081674	0.51044		prevalence	439	257	pathways
PWY-6317	timepoint	yr2:FeedERUSF (B)	timepointyr2:FeedERUSF (B)	0.113705	-0.04225	0.081576	0.077917	0.655604	0.077917	0.498323		abundance	439	439	pathways
PWY-7221	Feed	ERUSF (B)	FeedERUSF (B)	0.057517	-0.04231	0.05242	0.077842	0.655604	0.077842	0.498323		abundance	439	439	pathways
LACTOSECAT-PWY	timepoint	yr2:FeedERUSF (B)	timepointyr2:FeedERUSF (B)	0.485465	-0.04225	0.296222	0.0781	0.65578	0.0781	0.498323		abundance	439	439	pathways
PWY-5941	Feed	Local RUSF (A)	FeedLocal RUSF (A)	0.217177	0.071838	0.078913	0.079452	0.665762	0.079452	0.503198		abundance	439	439	pathways
PWY-6215	timepoint	yr2:FeedERUSF (B)	timepointyr2:FeedERUSF (B)	-1.20917	-0.04225	0.660595	0.079855	0.667758	0.153333	0.766106		abundance	439	186	pathways
PWY-6124	timepoint	yr2	timepointyr2	-0.37445	-0.52356	0.0758	0.08142	0.678881	0.08142	0.51044		abundance	439	439	pathways
PWY-7323	Feed	ERUSF (B)	FeedERUSF (B)	0.228621	-0.04231	0.153768	0.081519	0.678881	0.081519	0.51044		abundance	439	439	pathways
PWY-7238	Feed	Local RUSF (A)	FeedLocal RUSF (A)	0.235524	0.071838	0.090675	0.08201	0.680434	0.08201	0.51044		abundance	439	439	pathways
PWY-7456	Feed	ERUSF (B)	FeedERUSF (B)	0.257569	-0.04231	0.170766	0.082041	0.680434	0.15735	0.779158		abundance	439	427	pathways
PWY-7942	timepoint	yr2	timepointyr2	-0.62226	0	0.358267	0.08241	0.682107	0.007567	0.096568		prevalence	439	407	pathways
UNMAPPED	timepoint	yr2:FeedERUSF (B)	timepointyr2:FeedERUSF (B)	0.142088	-0.04225	0.100481	0.082914	0.684883	0.082914	0.513706		abundance	439	439	pathways
PWY-6210	Feed	Local RUSF (A)	FeedLocal RUSF (A)	1.11022	0.071838	0.594636	0.083616	0.689281	0.16024	0.787388		abundance	439	123	pathways
PWY-6478	Feed	Local RUSF (A)	FeedLocal RUSF (A)	-0.6556	0.071838	0.418394	0.084061	0.690887	0.161056	0.788782		abundance	439	219	pathways
PWY-6731	Feed	Local RUSF (A)	FeedLocal RUSF (A)	-0.29633	0.071838	0.211127	0.084151	0.690887	0.16122	0.788782		abundance	439	438	pathways
PWY-5088	timepoint	yr2	timepointyr2	-1.19313	-0.52356	0.384927	0.084545	0.692725	0.009686	0.114493		abundance	439	224	pathways
PWY0-1338	timepoint	yr2	timepointyr2	-0.60947	0	0.354198	0.085306	0.697549	0.108286	0.616739		prevalence	439	405	pathways
URSIN-PWY	timepoint	yr2:FeedLocal RUSF (A)	timepointyr2:FeedLocal RUSF (A)	-1.32197	-0.11513	0.691853	0.086461	0.70416	0.165446	0.79337		abundance	439	122	pathways
PWY-7316	timepoint	yr2	timepointyr2	-0.5441	0	0.317222	0.086306	0.70416	0.165163	0.79337		prevalence	439	220	pathways
ALL-CHORISMATE-PWY	timepoint	yr2:FeedLocal RUSF (A)	timepointyr2:FeedLocal RUSF (A)	-1.49677	-0.11513	0.796837	0.087679	0.712652	0.16767	0.794959		abundance	439	73	pathways
PWY-5896	timepoint	yr2	timepointyr2	-0.59721	0	0.350287	0.088208	0.715525	0.082035	0.51044		prevalence	439	396	pathways
PWY-5178	timepoint	yr2:FeedERUSF (B)	timepointyr2:FeedERUSF (B)	-2.79383	-0.04225	1.54046	0.088545	0.71683	0.169251	0.799499		abundance	439	27	pathways
PWY-7316	timepoint	yr2	timepointyr2	-1.44118	-0.52356	0.534086	0.088941	0.718597	0.165163	0.79337		abundance	439	220	pathways
PWY-6121	Feed	ERUSF (B)	FeedERUSF (B)	0.05272	-0.04231	0.051583	0.089615	0.722609	0.089615	0.54991		abundance	439	439	pathways
PWY-7723	timepoint	yr2	timepointyr2	0.106385	-0.52356	0.365548	0.089857	0.723123	0.171639	0.807806		abundance	439	212	pathways
THRESYN-PWY	Feed	ERUSF (B)	FeedERUSF (B)	0.069779	-0.04231	0.062825	0.09036	0.725735	0.09036	0.553156		abundance	439	439	pathways
COLANSYN-PWY	timepoint	yr2:FeedERUSF (B)	timepointyr2:FeedERUSF (B)	-0.30123	-0.04225	0.149327	0.090909	0.726709	0.090909	0.553876		abundance	439	439	pathways
PWY-7456	timepoint	yr2:FeedERUSF (B)	timepointyr2:FeedERUSF (B)	-0.45491	-0.04225	0.241179	0.091196	0.726709	0.174076	0.813305		abundance	439	427	pathways
PWY-6992	timepoint	yr2	timepointyr2	-0.58547	0	0.346524	0.091115	0.726709	0.042163	0.347742		prevalence	439	382	pathways
PWY-7391	Feed	ERUSF (B)	FeedERUSF (B)	-3.64204	0	2.15445	0.090937	0.726709	0.173605	0.813092		prevalence	439	110	pathways
PWY0-845	timepoint	yr2	timepointyr2	-0.8511	-0.52356	0.189625	0.09141	0.726989	0.174465	0.81364		abundance	439	437	pathways
PWY-7159	Feed	Local RUSF (A)	FeedLocal RUSF (A)	1.88835	0.071838	0.982826	0.091665	0.727593	0.174928	0.81432		abundance	439	16	pathways
NONMEVIPP-PWY	Feed	ERUSF (B)	FeedERUSF (B)	0.055098	-0.04231	0.053624	0.092205	0.72903	0.092205	0.555223		abundance	439	439	pathways
PWY-3001	Feed	ERUSF (B)	FeedERUSF (B)	0.055955	-0.04231	0.054362	0.092067	0.72903	0.092067	0.555223		abundance	439	439	pathways
PWY-5022	Feed	Local RUSF (A)	FeedLocal RUSF (A)	-0.46711	0.071838	0.319084	0.093176	0.734137	0.177671	0.819342		abundance	439	329	pathways
THRESYN-PWY	Feed	Local RUSF (A)	FeedLocal RUSF (A)	0.18562	0.071838	0.062823	0.093212	0.734137	0.093212	0.559928		abundance	439	439	pathways
OANTIGEN-PWY	Feed	ERUSF (B)	FeedERUSF (B)	0.075145	-0.04231	0.066739	0.093551	0.734806	0.093551	0.56065		abundance	439	439	pathways
PWY-241	timepoint	yr2	timepointyr2	-0.2508	-0.52356	0.158481	0.09402	0.734806	0.179201	0.819342		abundance	439	437	pathways
PWY-5514	timepoint	yr2:FeedERUSF (B)	timepointyr2:FeedERUSF (B)	0.787292	0	0.470001	0.093917	0.734806	0.179014	0.819342		prevalence	439	121	pathways
PWY-6396	Feed	ERUSF (B)	FeedERUSF (B)	-3.62263	0	2.16329	0.094014	0.734806	0.17919	0.819342		prevalence	439	236	pathways
PWY-7807	timepoint	yr2	timepointyr2	-1.13695	-0.52356	0.363349	0.094513	0.737236	0.011621	0.131893		abundance	439	333	pathways
PWY-5677	timepoint	yr2:FeedLocal RUSF (A)	timepointyr2:FeedLocal RUSF (A)	0.743771	0	0.446832	0.096004	0.74743	0.18279	0.829836		prevalence	439	180	pathways
PWY-5497	timepoint	yr2	timepointyr2	-0.89069	-0.52356	0.216864	0.096324	0.748493	0.18337	0.830997		abundance	439	430	pathways
P42-PWY	timepoint	yr2	timepointyr2	-0.22457	-0.52356	0.176033	0.097907	0.750259	0.097907	0.573358		abundance	439	439	pathways
PWY-5981	timepoint	yr2	timepointyr2	-0.97159	-0.52356	0.267136	0.097925	0.750259	0.186261	0.836079		abundance	439	431	pathways
PWY-6630	Feed	Local RUSF (A)	FeedLocal RUSF (A)	0.278083	0.071838	0.121753	0.097199	0.750259	0.097199	0.573026		abundance	439	439	pathways
PWY-7039	Feed	ERUSF (B)	FeedERUSF (B)	-0.76882	-0.04231	0.435788	0.098028	0.750259	0.186447	0.836079		abundance	439	154	pathways
PWY-7238	Feed	ERUSF (B)	FeedERUSF (B)	0.111983	-0.04231	0.090675	0.097627	0.750259	0.097627	0.573026		abundance	439	439	pathways
PWY-7688	Feed	ERUSF (B)	FeedERUSF (B)	-0.90431	-0.04231	0.517327	0.097768	0.750259	0.185978	0.836079		abundance	439	179	pathways
PWY-7688	timepoint	yr2:FeedLocal RUSF (A)	timepointyr2:FeedLocal RUSF (A)	1.2087	-0.11513	0.791436	0.097035	0.750259	0.184655	0.833498		abundance	439	179	pathways
P23-PWY	timepoint	yr2	timepointyr2	0.563363	0	0.339398	0.096937	0.750259	0.184477	0.833498		prevalence	439	336	pathways
PWY-5972	Feed	Local RUSF (A)	FeedLocal RUSF (A)	-0.38242	0.071838	0.273153	0.098888	0.755413	0.187997	0.840634		abundance	439	246	pathways
PWY-7616	Feed	Local RUSF (A)	FeedLocal RUSF (A)	-0.38412	0.071838	0.275303	0.09977	0.760723	0.189586	0.842808		abundance	439	366	pathways
P23-PWY	timepoint	yr2	timepointyr2	0.004073	-0.52356	0.316922	0.100167	0.762318	0.184477	0.833498		abundance	439	336	pathways
SALVADEHYPOX-PWY	timepoint	yr2	timepointyr2	-0.9036	-0.52356	0.227789	0.100885	0.766346	0.191591	0.84718		abundance	439	438	pathways
ASPASN-PWY	timepoint	yr2:FeedLocal RUSF (A)	timepointyr2:FeedLocal RUSF (A)	0.021096	-0.11513	0.078248	0.101442	0.769146	0.101442	0.582103		abundance	439	439	pathways
GALACT-GLUCUROCAT-PWY	timepoint	yr2:FeedERUSF (B)	timepointyr2:FeedERUSF (B)	-0.39264	-0.04225	0.210941	0.102073	0.77105	0.193727	0.850874		abundance	439	438	pathways
PWY-7039	timepoint	yr2:FeedLocal RUSF (A)	timepointyr2:FeedLocal RUSF (A)	0.888057	-0.11513	0.604542	0.101911	0.77105	0.193437	0.850874		abundance	439	154	pathways
PWY-7196	Feed	ERUSF (B)	FeedERUSF (B)	0.38131	-0.04231	0.258209	0.102702	0.774359	0.194856	0.852909		abundance	439	342	pathways
UBISYN-PWY	Feed	Local RUSF (A)	FeedLocal RUSF (A)	-3.58858	0	2.20181	0.103137	0.776198	0.195636	0.854865		prevalence	439	292	pathways
PWY-6731	timepoint	yr2:FeedLocal RUSF (A)	timepointyr2:FeedLocal RUSF (A)	0.357422	-0.11513	0.288059	0.1035	0.777491	0.196287	0.854906		abundance	439	438	pathways
PWY-5656	timepoint	yr2:FeedERUSF (B)	timepointyr2:FeedERUSF (B)	-0.75516	-0.04225	0.436025	0.103727	0.777758	0.196694	0.854906		abundance	439	408	pathways
PWY-6328	timepoint	yr2:FeedERUSF (B)	timepointyr2:FeedERUSF (B)	-0.89404	-0.04225	0.52081	0.104135	0.778486	0.197426	0.854906		abundance	439	322	pathways
PWY-7373	timepoint	yr2:FeedLocal RUSF (A)	timepointyr2:FeedLocal RUSF (A)	0.889691	-0.11513	0.611845	0.104207	0.778486	0.197555	0.854906		abundance	439	148	pathways
PWY-7316	Feed	Local RUSF (A)	FeedLocal RUSF (A)	-0.73383	0.071838	0.495394	0.105702	0.785322	0.20023	0.861729		abundance	439	220	pathways
PWY0-1533	timepoint	yr2	timepointyr2	-1.13048	-0.52356	0.371601	0.105476	0.785322	0.011621	0.131893		abundance	439	334	pathways
PWY-5265	timepoint	yr2	timepointyr2	-0.53328	0	0.32959	0.10566	0.785322	0.07343	0.482944		prevalence	439	288	pathways
PWY-6708	Feed	Local RUSF (A)	FeedLocal RUSF (A)	-3.55385	0	2.19954	0.106154	0.787246	0.20104	0.862419		prevalence	439	293	pathways
PWY-5464	timepoint	yr2:FeedLocal RUSF (A)	timepointyr2:FeedLocal RUSF (A)	0.461886	-0.11513	0.356189	0.107007	0.788481	0.202564	0.862419		abundance	439	339	pathways
PWY-6470	timepoint	yr2	timepointyr2	-0.04023	-0.52356	0.297165	0.107485	0.788481	0.203417	0.862419		abundance	439	374	pathways
PWY-7209	Feed	Local RUSF (A)	FeedLocal RUSF (A)	-0.26065	0.071838	0.204512	0.107167	0.788481	0.202849	0.862419		abundance	439	431	pathways
PWY66-389	Feed	ERUSF (B)	FeedERUSF (B)	-0.68849	-0.04231	0.399077	0.106584	0.788481	0.201808	0.862419		abundance	439	430	pathways
PWY-5870	Feed	ERUSF (B)	FeedERUSF (B)	-3.46115	0	2.14803	0.107112	0.788481	0.202752	0.862419		prevalence	439	84	pathways
THREOCAT-PWY	Feed	Local RUSF (A)	FeedLocal RUSF (A)	-3.46337	0	2.15138	0.107433	0.788481	0.203325	0.862419		prevalence	439	358	pathways
PWY-7197	timepoint	yr2:FeedERUSF (B)	timepointyr2:FeedERUSF (B)	0.15518	-0.04225	0.117968	0.10844	0.794057	0.10844	0.616739		abundance	439	439	pathways
PWY-5265	timepoint	yr2:FeedLocal RUSF (A)	timepointyr2:FeedLocal RUSF (A)	0.727926	0	0.454084	0.10892	0.794769	0.205976	0.866641		prevalence	439	288	pathways
PWY66-367	Feed	Local RUSF (A)	FeedLocal RUSF (A)	-3.44	0	2.14594	0.108929	0.794769	0.205992	0.866641		prevalence	439	297	pathways
PWY-841	timepoint	yr2:FeedERUSF (B)	timepointyr2:FeedERUSF (B)	0.094097	-0.04225	0.078313	0.109792	0.799634	0.109792	0.621672		abundance	439	439	pathways
PWY-7031	Feed	ERUSF (B)	FeedERUSF (B)	-3.42604	0	2.14621	0.110418	0.802751	0.208643	0.868783		prevalence	439	104	pathways
PWY-3001	Feed	Local RUSF (A)	FeedLocal RUSF (A)	0.167059	0.071838	0.054361	0.111362	0.807383	0.111362	0.626989		abundance	439	439	pathways
PWY-5972	timepoint	yr2	timepointyr2	-0.51501	0	0.323558	0.111452	0.807383	0.210483	0.873606		prevalence	439	246	pathways
CRNFORCAT-PWY	timepoint	yr2	timepointyr2	0.510605	-0.52356	0.63887	0.112151	0.810653	0.211724	0.875922		abundance	439	77	pathways
PWY-6703	timepoint	yr2:FeedLocal RUSF (A)	timepointyr2:FeedLocal RUSF (A)	0.114268	-0.11513	0.141598	0.112303	0.810653	0.112303	0.628943		abundance	439	439	pathways
PWY-1269	timepoint	yr2:FeedERUSF (B)	timepointyr2:FeedERUSF (B)	0.180878	-0.04225	0.1366	0.112946	0.812246	0.112946	0.629414		abundance	439	439	pathways
PWY-6163	timepoint	yr2:FeedERUSF (B)	timepointyr2:FeedERUSF (B)	0.093317	-0.04225	0.078781	0.113123	0.812246	0.113123	0.629414		abundance	439	439	pathways
PWY-6609	Feed	ERUSF (B)	FeedERUSF (B)	0.069652	-0.04231	0.067174	0.112983	0.812246	0.112983	0.629414		abundance	439	439	pathways
PWY-7783	Feed	ERUSF (B)	FeedERUSF (B)	1.27947	-0.04231	0.812125	0.113425	0.812976	0.213984	0.88101		abundance	439	38	pathways
PWY-7312	timepoint	yr2:FeedLocal RUSF (A)	timepointyr2:FeedLocal RUSF (A)	0.759572	0	0.480991	0.114294	0.817767	0.215525	0.883548		prevalence	439	78	pathways
GLUCONEO-PWY	Feed	ERUSF (B)	FeedERUSF (B)	0.061435	-0.04231	0.062368	0.115082	0.818014	0.115082	0.634808		abundance	439	439	pathways
PWY-6572	Feed	ERUSF (B)	FeedERUSF (B)	-0.82172	-0.04231	0.490948	0.115047	0.818014	0.216857	0.883548		abundance	439	131	pathways
PWY-7315	timepoint	yr2	timepointyr2	-0.99082	-0.52356	0.293478	0.115134	0.818014	0.217012	0.883548		abundance	439	425	pathways
ALL-CHORISMATE-PWY	Feed	ERUSF (B)	FeedERUSF (B)	-3.38703	0	2.14749	0.114749	0.818014	0.216331	0.883548		prevalence	439	73	pathways
GLYCOL-GLYOXDEG-PWY	timepoint	yr2	timepointyr2	-0.56425	0	0.35869	0.115699	0.820595	0.015753	0.16697		prevalence	439	412	pathways
PWY-5654	Feed	Local RUSF (A)	FeedLocal RUSF (A)	1.0281	0.071838	0.604246	0.116453	0.823034	0.219345	0.885272		abundance	439	122	pathways
PWY-5870	Feed	Local RUSF (A)	FeedLocal RUSF (A)	0.803577	0.071838	0.461998	0.117729	0.823034	0.221599	0.885272		abundance	439	84	pathways
PWY-6215	timepoint	yr2	timepointyr2	0.230989	-0.52356	0.478575	0.117787	0.823034	0.2217	0.885272		abundance	439	186	pathways
PWY-6527	timepoint	yr2:FeedERUSF (B)	timepointyr2:FeedERUSF (B)	0.11604	-0.04225	0.095574	0.118026	0.823034	0.118026	0.64258		abundance	439	439	pathways
PWY-6703	Feed	Local RUSF (A)	FeedLocal RUSF (A)	-0.0851	0.071838	0.097442	0.118674	0.823034	0.118674	0.64258		abundance	439	439	pathways
PWY-724	Feed	ERUSF (B)	FeedERUSF (B)	0.048894	-0.04231	0.054213	0.118231	0.823034	0.118231	0.64258		abundance	439	439	pathways
PWY-7446	timepoint	yr2:FeedERUSF (B)	timepointyr2:FeedERUSF (B)	-0.77396	-0.04225	0.465247	0.118109	0.823034	0.222269	0.885272		abundance	439	374	pathways
P221-PWY	timepoint	yr2	timepointyr2	-0.55263	0	0.354671	0.119198	0.823034	0.05627	0.410033		prevalence	439	403	pathways
PWY-101	timepoint	yr2	timepointyr2	0.55263	0	0.354671	0.119198	0.823034	0.224188	0.885272		prevalence	439	31	pathways
PWY-5180	timepoint	yr2	timepointyr2	-0.49798	0	0.31788	0.117216	0.823034	0.065129	0.453956		prevalence	439	279	pathways
PWY-5690	timepoint	yr2	timepointyr2	0.55263	0	0.354671	0.119198	0.823034	0.224188	0.885272		prevalence	439	389	pathways
PWY-6143	Feed	ERUSF (B)	FeedERUSF (B)	-3.363	0	2.14487	0.116898	0.823034	0.220131	0.885272		prevalence	439	122	pathways
PWY-7094	timepoint	yr2	timepointyr2	-0.55263	0	0.354671	0.119198	0.823034	0.224188	0.885272		prevalence	439	401	pathways
PWY-7391	Feed	Local RUSF (A)	FeedLocal RUSF (A)	-3.35221	0	2.15191	0.119283	0.823034	0.224338	0.885272		prevalence	439	110	pathways
PWY-7731	timepoint	yr2	timepointyr2	0.55263	0	0.354671	0.119198	0.823034	0.224188	0.885272		prevalence	439	31	pathways
PWY0-1337	timepoint	yr2	timepointyr2	-0.55263	0	0.354671	0.119198	0.823034	0.224188	0.885272		prevalence	439	402	pathways
PWY1G-0	Feed	Local RUSF (A)	FeedLocal RUSF (A)	0.576388	0.071838	0.320016	0.119716	0.82462	0.2251	0.885554		abundance	439	92	pathways
PWY-6565	timepoint	yr2:FeedLocal RUSF (A)	timepointyr2:FeedLocal RUSF (A)	0.751945	0	0.485186	0.121188	0.833345	0.227689	0.894368		prevalence	439	83	pathways
PWY-7790	Feed	ERUSF (B)	FeedERUSF (B)	0.062386	-0.04231	0.06441	0.121829	0.836338	0.121829	0.653747		abundance	439	439	pathways
PWY-5188	timepoint	yr2	timepointyr2	-0.34868	-0.52356	0.107154	0.123372	0.841689	0.123372	0.659269		abundance	439	439	pathways
PWY-6595	timepoint	yr2:FeedERUSF (B)	timepointyr2:FeedERUSF (B)	0.449975	-0.04225	0.316853	0.12368	0.841689	0.232064	0.900819		abundance	439	435	pathways
PWY-7791	Feed	ERUSF (B)	FeedERUSF (B)	0.062386	-0.04231	0.06441	0.122942	0.841689	0.122942	0.658344		abundance	439	439	pathways
PWY-5265	Feed	ERUSF (B)	FeedERUSF (B)	-3.30402	0	2.14713	0.123851	0.841689	0.232363	0.900819		prevalence	439	288	pathways
PWY-7332	Feed	ERUSF (B)	FeedERUSF (B)	-3.3005	0	2.14312	0.12355	0.841689	0.231836	0.900819		prevalence	439	80	pathways
PWY-7805	Feed	Local RUSF (A)	FeedLocal RUSF (A)	-3.36359	0	2.18171	0.123141	0.841689	0.231118	0.900819		prevalence	439	311	pathways
CRNFORCAT-PWY	timepoint	yr2:FeedLocal RUSF (A)	timepointyr2:FeedLocal RUSF (A)	-1.29135	-0.11513	0.751258	0.12474	0.844908	0.233921	0.903624		abundance	439	77	pathways
PWY-1269	timepoint	yr2:FeedLocal RUSF (A)	timepointyr2:FeedLocal RUSF (A)	0.099386	-0.11513	0.13664	0.124721	0.844908	0.124721	0.660781		abundance	439	439	pathways
GLYCOGENSYNTH-PWY	timepoint	yr2:FeedERUSF (B)	timepointyr2:FeedERUSF (B)	-0.18553	-0.04225	0.087239	0.125057	0.845208	0.125057	0.660781		abundance	439	439	pathways
PWY0-1296	Feed	ERUSF (B)	FeedERUSF (B)	0.103801	-0.04231	0.09294	0.125201	0.845208	0.125201	0.660781		abundance	439	439	pathways
PWY-6992	timepoint	yr2:FeedLocal RUSF (A)	timepointyr2:FeedLocal RUSF (A)	0.615301	-0.11513	0.475658	0.126074	0.849694	0.236254	0.911264		abundance	439	382	pathways
PWY-7245	Feed	ERUSF (B)	FeedERUSF (B)	0.828574	-0.04231	0.564831	0.126668	0.852281	0.237291	0.911771		abundance	439	98	pathways
PWY-241	Feed	ERUSF (B)	FeedERUSF (B)	0.19177	-0.04231	0.151764	0.126963	0.852858	0.237807	0.911771		abundance	439	437	pathways
PWY-7245	timepoint	yr2:FeedLocal RUSF (A)	timepointyr2:FeedLocal RUSF (A)	-1.31883	-0.11513	0.779819	0.129231	0.86381	0.241762	0.916886		abundance	439	98	pathways
PYRIDNUCSYN-PWY	timepoint	yr2:FeedERUSF (B)	timepointyr2:FeedERUSF (B)	0.073067	-0.04225	0.068574	0.12905	0.86381	0.12905	0.678306		abundance	439	439	pathways
UBISYN-PWY	timepoint	yr2:FeedLocal RUSF (A)	timepointyr2:FeedLocal RUSF (A)	-0.79138	-0.11513	0.442866	0.129203	0.86381	0.241713	0.916886		abundance	439	292	pathways
PWY-6478	Feed	ERUSF (B)	FeedERUSF (B)	-3.24493	0	2.14076	0.129574	0.864676	0.242358	0.916886		prevalence	439	219	pathways
TYRFUMCAT-PWY	timepoint	yr2:FeedERUSF (B)	timepointyr2:FeedERUSF (B)	-3.25478	-0.04225	2.0243	0.129977	0.865944	0.24306	0.918186		abundance	439	24	pathways
SULFATE-CYS-PWY	timepoint	yr2	timepointyr2	-0.76967	-0.52356	0.158157	0.130366	0.866529	0.243736	0.918304		abundance	439	438	pathways
PWY-6749	Feed	ERUSF (B)	FeedERUSF (B)	-3.23636	0	2.14021	0.130491	0.866529	0.243954	0.918304		prevalence	439	238	pathways
PYRIDNUCSYN-PWY	Feed	ERUSF (B)	FeedERUSF (B)	0.035754	-0.04231	0.04719	0.130836	0.8674	0.130836	0.684885		abundance	439	439	pathways
PWY-5971	timepoint	yr2:FeedLocal RUSF (A)	timepointyr2:FeedLocal RUSF (A)	-0.44409	-0.11513	0.216096	0.132355	0.876046	0.247193	0.925619		abundance	439	421	pathways
ALL-CHORISMATE-PWY	timepoint	yr2	timepointyr2	-0.51073	0	0.340008	0.133066	0.879315	0.248425	0.926176		prevalence	439	73	pathways
PWY-5030	Feed	ERUSF (B)	FeedERUSF (B)	-0.56372	-0.04231	0.346158	0.133608	0.881464	0.249364	0.928331		abundance	439	388	pathways
PWY-5265	timepoint	yr2:FeedLocal RUSF (A)	timepointyr2:FeedLocal RUSF (A)	-0.91714	-0.11513	0.531746	0.133846	0.881607	0.205976	0.866641		abundance	439	288	pathways
PANTOSYN-PWY	Feed	Local RUSF (A)	FeedLocal RUSF (A)	-0.01863	0.071838	0.055089	0.134347	0.882047	0.134347	0.697572		abundance	439	439	pathways
PWY-7873	Feed	Local RUSF (A)	FeedLocal RUSF (A)	-3.24328	0	2.16607	0.134312	0.882047	0.250584	0.931518		prevalence	439	303	pathways
DENITRIFICATION-PWY	Feed	ERUSF (B)	FeedERUSF (B)	-0.69763	-0.04231	0.436754	0.135353	0.885789	0.252386	0.936859		abundance	439	219	pathways
PWY-5097	Feed	ERUSF (B)	FeedERUSF (B)	0.0377	-0.04231	0.049286	0.135296	0.885789	0.135296	0.701078		abundance	439	439	pathways
AEROBACTINSYN-PWY	Feed	ERUSF (B)	FeedERUSF (B)	-0.59252	-0.04231	0.370376	0.138936	0.886984	0.258569	0.946811		abundance	439	266	pathways
HISTSYN-PWY	timepoint	yr2:FeedERUSF (B)	timepointyr2:FeedERUSF (B)	0.096216	-0.04225	0.087267	0.13758	0.886984	0.13758	0.710198		abundance	439	439	pathways
HSERMETANA-PWY	timepoint	yr2:FeedLocal RUSF (A)	timepointyr2:FeedLocal RUSF (A)	0.046665	-0.11513	0.105099	0.138163	0.886984	0.138163	0.710198		abundance	439	439	pathways
METHGLYUT-PWY	Feed	ERUSF (B)	FeedERUSF (B)	-0.44063	-0.04231	0.266291	0.136624	0.886984	0.254581	0.942281		abundance	439	413	pathways
PWY-5659	timepoint	yr2:FeedERUSF (B)	timepointyr2:FeedERUSF (B)	-0.31292	-0.04225	0.178888	0.138119	0.886984	0.138119	0.710198		abundance	439	439	pathways
PWY-6182	timepoint	yr2	timepointyr2	0.328972	-0.52356	0.56888	0.137646	0.886984	0.256345	0.946078		abundance	439	140	pathways
PWY-6396	Feed	Local RUSF (A)	FeedLocal RUSF (A)	0.664838	0.071838	0.398165	0.138348	0.886984	0.257555	0.946811		abundance	439	236	pathways
PWY-6895	timepoint	yr2:FeedERUSF (B)	timepointyr2:FeedERUSF (B)	0.296225	-0.04225	0.225563	0.137985	0.886984	0.137985	0.710198		abundance	439	439	pathways
PWY-7198	timepoint	yr2:FeedLocal RUSF (A)	timepointyr2:FeedLocal RUSF (A)	0.16477	-0.11513	0.187463	0.139711	0.886984	0.139711	0.716719		abundance	439	439	pathways
PWY-7385	timepoint	yr2	timepointyr2	-0.95353	-0.52356	0.28774	0.138912	0.886984	0.258527	0.946811		abundance	439	402	pathways
PWY-7409	timepoint	yr2:FeedLocal RUSF (A)	timepointyr2:FeedLocal RUSF (A)	-0.89165	-0.11513	0.521915	0.139783	0.886984	0.260026	0.946811		abundance	439	253	pathways
PWY66-389	timepoint	yr2:FeedLocal RUSF (A)	timepointyr2:FeedLocal RUSF (A)	0.743989	-0.11513	0.578333	0.139195	0.886984	0.259015	0.946811		abundance	439	430	pathways
SO4ASSIM-PWY	timepoint	yr2	timepointyr2	-0.82544	-0.52356	0.200199	0.139611	0.886984	0.259731	0.946811		abundance	439	438	pathways
TCA	timepoint	yr2	timepointyr2	-0.87981	-0.52356	0.237029	0.137899	0.886984	0.256782	0.946332		abundance	439	432	pathways
PWY-5004	timepoint	yr2	timepointyr2	-0.49216	0	0.333403	0.139901	0.886984	0.260229	0.946811		prevalence	439	127	pathways
PWY-5870	timepoint	yr2	timepointyr2	-0.50127	0	0.336651	0.136492	0.886984	0.254355	0.942281		prevalence	439	84	pathways
PWY-6562	Feed	Local RUSF (A)	FeedLocal RUSF (A)	-3.16367	0	2.14011	0.139335	0.886984	0.259256	0.946811		prevalence	439	263	pathways
PWY-7688	timepoint	yr2:FeedERUSF (B)	timepointyr2:FeedERUSF (B)	-0.64521	0	0.436291	0.139183	0.886984	0.115919	0.635325		prevalence	439	179	pathways
PWY0-41	Feed	Local RUSF (A)	FeedLocal RUSF (A)	-3.21102	0	2.16153	0.137404	0.886984	0.255929	0.945903		prevalence	439	361	pathways
PWY1G-0	timepoint	yr2:FeedLocal RUSF (A)	timepointyr2:FeedLocal RUSF (A)	-0.69623	0	0.471412	0.139701	0.886984	0.079311	0.503198		prevalence	439	92	pathways
PWY-5392	Feed	Local RUSF (A)	FeedLocal RUSF (A)	-3.15661	0	2.14335	0.140819	0.891383	0.261808	0.947537		prevalence	439	260	pathways
PWY-5972	timepoint	yr2:FeedLocal RUSF (A)	timepointyr2:FeedLocal RUSF (A)	0.653237	0	0.443789	0.141033	0.891383	0.262176	0.947537		prevalence	439	246	pathways
PWY-5415	timepoint	yr2:FeedLocal RUSF (A)	timepointyr2:FeedLocal RUSF (A)	-0.79373	-0.11513	0.459537	0.142164	0.891636	0.264118	0.947537		abundance	439	290	pathways
PWY-6708	timepoint	yr2:FeedLocal RUSF (A)	timepointyr2:FeedLocal RUSF (A)	-0.77083	-0.11513	0.443846	0.14217	0.891636	0.264128	0.947537		abundance	439	293	pathways
PWY-6748	timepoint	yr2:FeedLocal RUSF (A)	timepointyr2:FeedLocal RUSF (A)	-1.48225	-0.11513	0.743751	0.14215	0.891636	0.264093	0.947537		abundance	439	35	pathways
TYRFUMCAT-PWY	Feed	ERUSF (B)	FeedERUSF (B)	1.58193	-0.04231	1.05716	0.141881	0.891636	0.263631	0.947537		abundance	439	24	pathways
LIPASYN-PWY	Feed	Local RUSF (A)	FeedLocal RUSF (A)	-3.15161	0	2.14439	0.141644	0.891636	0.263224	0.947537		prevalence	439	163	pathways
ARGSYN-PWY	Feed	ERUSF (B)	FeedERUSF (B)	0.054475	-0.04231	0.062656	0.143149	0.89189	0.143149	0.729976		abundance	439	439	pathways
P164-PWY	Feed	ERUSF (B)	FeedERUSF (B)	-0.33876	-0.04231	0.201222	0.143276	0.89189	0.266024	0.9482		abundance	439	413	pathways
PWY-5695	Feed	ERUSF (B)	FeedERUSF (B)	0.031383	-0.04231	0.045692	0.143528	0.89189	0.143528	0.730453		abundance	439	439	pathways
PWY-822	Feed	Local RUSF (A)	FeedLocal RUSF (A)	0.794375	0.071838	0.490442	0.143033	0.89189	0.265607	0.9482		abundance	439	156	pathways
ALL-CHORISMATE-PWY	Feed	Local RUSF (A)	FeedLocal RUSF (A)	-3.14737	0	2.15071	0.143356	0.89189	0.266161	0.9482		prevalence	439	73	pathways
PWY-7254	timepoint	yr2	timepointyr2	0.48338	0	0.330257	0.14329	0.89189	0.266047	0.9482		prevalence	439	334	pathways
RUMP-PWY	timepoint	yr2:FeedLocal RUSF (A)	timepointyr2:FeedLocal RUSF (A)	-0.97223	-0.11513	0.582647	0.143971	0.891994	0.267214	0.949312		abundance	439	180	pathways
PWY-5870	Feed	Local RUSF (A)	FeedLocal RUSF (A)	-3.14186	0	2.15031	0.143983	0.891994	0.221599	0.885272		prevalence	439	84	pathways
PWY0-1415	timepoint	yr2	timepointyr2	-0.93553	-0.52356	0.279794	0.145287	0.893265	0.269466	0.949425		abundance	439	428	pathways
PWY-5692	Feed	Local RUSF (A)	FeedLocal RUSF (A)	-3.1596	0	2.16722	0.144866	0.893265	0.268746	0.949425		prevalence	439	317	pathways
PWY-6182	timepoint	yr2:FeedERUSF (B)	timepointyr2:FeedERUSF (B)	0.669009	0	0.458562	0.144585	0.893265	0.092213	0.555223		prevalence	439	140	pathways
PWY-622	Feed	Local RUSF (A)	FeedLocal RUSF (A)	-3.12259	0	2.14381	0.145237	0.893265	0.269381	0.949425		prevalence	439	425	pathways
URDEGR-PWY	Feed	Local RUSF (A)	FeedLocal RUSF (A)	-3.1596	0	2.16722	0.144866	0.893265	0.268746	0.949425		prevalence	439	317	pathways
GALACTUROCAT-PWY	timepoint	yr2:FeedERUSF (B)	timepointyr2:FeedERUSF (B)	-0.30598	-0.04225	0.177714	0.145597	0.893816	0.145597	0.7366		abundance	439	439	pathways
P164-PWY	timepoint	yr2	timepointyr2	-0.21984	-0.52356	0.205852	0.146474	0.897846	0.271494	0.952371		abundance	439	413	pathways
LPSSYN-PWY	timepoint	yr2	timepointyr2	-0.96816	-0.52356	0.304637	0.148525	0.904958	0.029031	0.272689		abundance	439	342	pathways
PWY-7242	Feed	Local RUSF (A)	FeedLocal RUSF (A)	-0.13262	0.071838	0.139094	0.148058	0.904958	0.148058	0.746107		abundance	439	439	pathways
PWY-7820	Feed	Local RUSF (A)	FeedLocal RUSF (A)	1.34745	0.071838	0.866011	0.148516	0.904958	0.274974	0.9583		abundance	439	47	pathways
PWY-7883	timepoint	yr2:FeedLocal RUSF (A)	timepointyr2:FeedLocal RUSF (A)	-0.52268	-0.11513	0.27996	0.148367	0.904958	0.274721	0.9583		abundance	439	435	pathways
PWY-7332	Feed	Local RUSF (A)	FeedLocal RUSF (A)	-3.08553	0	2.14006	0.14936	0.908679	0.276411	0.958793		prevalence	439	80	pathways
COLANSYN-PWY	Feed	ERUSF (B)	FeedERUSF (B)	0.108555	-0.04231	0.102761	0.149826	0.910156	0.149826	0.753538		abundance	439	439	pathways
RUMP-PWY	timepoint	yr2:FeedERUSF (B)	timepointyr2:FeedERUSF (B)	-0.91576	-0.04225	0.602511	0.150126	0.910614	0.277714	0.958793		abundance	439	180	pathways
PWY-6151	Feed	ERUSF (B)	FeedERUSF (B)	0.054194	-0.04231	0.063859	0.151187	0.911607	0.151187	0.758892		abundance	439	439	pathways
PWY-6470	Feed	ERUSF (B)	FeedERUSF (B)	-0.46919	-0.04231	0.295995	0.150967	0.911607	0.279142	0.958793		abundance	439	374	pathways
TYRFUMCAT-PWY	Feed	Local RUSF (A)	FeedLocal RUSF (A)	1.59039	0.071838	1.01215	0.150917	0.911607	0.279059	0.958793		abundance	439	24	pathways
PWY-822	Feed	Local RUSF (A)	FeedLocal RUSF (A)	3.07776	0	2.14402	0.151143	0.911607	0.265607	0.9482		prevalence	439	156	pathways
GLUTORN-PWY	Feed	Local RUSF (A)	FeedLocal RUSF (A)	0.167966	0.071838	0.062375	0.152326	0.912341	0.152326	0.763116		abundance	439	439	pathways
P108-PWY	timepoint	yr2:FeedERUSF (B)	timepointyr2:FeedERUSF (B)	0.402299	-0.04225	0.307732	0.151664	0.912341	0.280327	0.958793		abundance	439	430	pathways
PWY-5676	timepoint	yr2:FeedERUSF (B)	timepointyr2:FeedERUSF (B)	-0.43024	-0.04225	0.26833	0.152284	0.912341	0.281378	0.95937		abundance	439	435	pathways
PWY-7294	timepoint	yr2:FeedERUSF (B)	timepointyr2:FeedERUSF (B)	-1.28319	-0.04225	0.859296	0.152736	0.912341	0.282143	0.95937		abundance	439	92	pathways
PWY-7783	timepoint	yr2	timepointyr2	0.66729	-0.52356	0.768209	0.15288	0.912341	0.282388	0.95937		abundance	439	38	pathways
PWY-8086	Feed	ERUSF (B)	FeedERUSF (B)	-0.46593	-0.04231	0.294809	0.152651	0.912341	0.282	0.95937		abundance	439	356	pathways
THREOCAT-PWY	Feed	ERUSF (B)	FeedERUSF (B)	-0.45627	-0.04231	0.287967	0.152312	0.912341	0.281425	0.95937		abundance	439	358	pathways
ANAEROFRUCAT-PWY	timepoint	yr2	timepointyr2	-0.40702	-0.52356	0.072792	0.155146	0.91309	0.155146	0.771222		abundance	439	439	pathways
CATECHOL-ORTHO-CLEAVAGE-PWY	timepoint	yr2	timepointyr2	0.133643	-0.52356	0.458611	0.155666	0.91309	0.287099	0.964091		abundance	439	170	pathways
PROTOCATECHUATE-ORTHO-CLEAVAGE-PWY	timepoint	yr2:FeedERUSF (B)	timepointyr2:FeedERUSF (B)	-0.9115	-0.04225	0.605505	0.153542	0.91309	0.283509	0.961904		abundance	439	250	pathways
PWY-6895	Feed	ERUSF (B)	FeedERUSF (B)	-0.26603	-0.04231	0.155225	0.15352	0.91309	0.15352	0.766106		abundance	439	439	pathways
PWY-6895	timepoint	yr2	timepointyr2	-0.28679	-0.52356	0.162606	0.155617	0.91309	0.155617	0.772065		abundance	439	439	pathways
PWY-7807	Feed	ERUSF (B)	FeedERUSF (B)	-0.50415	-0.04231	0.324128	0.155702	0.91309	0.28716	0.964091		abundance	439	333	pathways
PWY-8187	timepoint	yr2:FeedLocal RUSF (A)	timepointyr2:FeedLocal RUSF (A)	-0.44258	-0.11513	0.22759	0.154458	0.91309	0.154458	0.76929		abundance	439	439	pathways
PWY66-389	timepoint	yr2:FeedERUSF (B)	timepointyr2:FeedERUSF (B)	0.78331	-0.04225	0.57615	0.153878	0.91309	0.284078	0.962561		abundance	439	430	pathways
P164-PWY	timepoint	yr2	timepointyr2	0.516363	0	0.363355	0.155288	0.91309	0.271494	0.952371		prevalence	439	413	pathways
PWY-5747	timepoint	yr2	timepointyr2	-0.51636	0	0.363355	0.155288	0.91309	0.073063	0.482944		prevalence	439	416	pathways
PWY-6143	Feed	Local RUSF (A)	FeedLocal RUSF (A)	-3.05879	0	2.14988	0.154801	0.91309	0.285639	0.964091		prevalence	439	122	pathways
PWY-6467	timepoint	yr2:FeedLocal RUSF (A)	timepointyr2:FeedLocal RUSF (A)	0.672576	0	0.473325	0.155329	0.91309	0.286531	0.964091		prevalence	439	59	pathways
PWY-6562	timepoint	yr2	timepointyr2	0.046143	-0.52356	0.399478	0.15691	0.917527	0.289199	0.968326		abundance	439	263	pathways
PWY-6920	Feed	ERUSF (B)	FeedERUSF (B)	3.03886	0	2.14614	0.156787	0.917527	0.144369	0.733281		prevalence	439	248	pathways
ANAEROFRUCAT-PWY	Feed	ERUSF (B)	FeedERUSF (B)	0.062103	-0.04231	0.070681	0.158068	0.918748	0.158068	0.779702		abundance	439	439	pathways
PWY-241	timepoint	yr2:FeedERUSF (B)	timepointyr2:FeedERUSF (B)	-0.3556	-0.04225	0.22017	0.159277	0.918748	0.293185	0.973363		abundance	439	437	pathways
PWY-5384	Feed	ERUSF (B)	FeedERUSF (B)	0.161472	-0.04231	0.142621	0.157884	0.918748	0.157884	0.779702		abundance	439	439	pathways
AST-PWY	timepoint	yr2	timepointyr2	-0.50546	0	0.359222	0.159397	0.918748	0.009659	0.114493		prevalence	439	413	pathways
HCAMHPDEG-PWY	timepoint	yr2	timepointyr2	-0.50546	0	0.359222	0.159397	0.918748	0.008161	0.102109		prevalence	439	407	pathways
METHGLYUT-PWY	timepoint	yr2	timepointyr2	-0.50546	0	0.359222	0.159397	0.918748	0.111465	0.626989		prevalence	439	413	pathways
PWY-5870	timepoint	yr2:FeedERUSF (B)	timepointyr2:FeedERUSF (B)	0.656594	0	0.465904	0.158749	0.918748	0.292297	0.972429		prevalence	439	84	pathways
PWY-6690	timepoint	yr2	timepointyr2	-0.50546	0	0.359222	0.159397	0.918748	0.008108	0.101951		prevalence	439	407	pathways
PWY-7031	Feed	Local RUSF (A)	FeedLocal RUSF (A)	-3.01824	0	2.14607	0.159605	0.918748	0.293737	0.973363		prevalence	439	104	pathways
PWY-7039	Feed	Local RUSF (A)	FeedLocal RUSF (A)	-3.0259	0	2.14102	0.157568	0.918748	0.290309	0.968326		prevalence	439	154	pathways
PWY-7211	timepoint	yr2	timepointyr2	-0.50546	0	0.359222	0.159397	0.918748	0.293386	0.973363		prevalence	439	417	pathways
COMPLETE-ARO-PWY	Feed	ERUSF (B)	FeedERUSF (B)	0.027005	-0.04231	0.044558	0.160081	0.92018	0.160081	0.787388		abundance	439	439	pathways
PWY-5705	timepoint	yr2	timepointyr2	-1.00187	-0.52356	0.338158	0.160592	0.921818	0.077628	0.498323		abundance	439	389	pathways
PWY-7208	timepoint	yr2:FeedERUSF (B)	timepointyr2:FeedERUSF (B)	0.122143	-0.04225	0.11249	0.161447	0.924111	0.161447	0.788782		abundance	439	439	pathways
PWY-7268	timepoint	yr2:FeedERUSF (B)	timepointyr2:FeedERUSF (B)	-1.24237	-0.04225	0.841517	0.161368	0.924111	0.296696	0.978239		abundance	439	99	pathways
COA-PWY	timepoint	yr2:FeedLocal RUSF (A)	timepointyr2:FeedLocal RUSF (A)	0.011629	-0.11513	0.086361	0.161886	0.924208	0.161886	0.789424		abundance	439	439	pathways
DENITRIFICATION-PWY	timepoint	yr2	timepointyr2	0.058192	-0.52356	0.415649	0.164369	0.924208	0.037419	0.32316		abundance	439	219	pathways
PROTOCATECHUATE-ORTHO-CLEAVAGE-PWY	timepoint	yr2:FeedLocal RUSF (A)	timepointyr2:FeedLocal RUSF (A)	-0.90167	-0.11513	0.561386	0.163686	0.924208	0.300579	0.978239		abundance	439	250	pathways
PWY-5695	timepoint	yr2:FeedLocal RUSF (A)	timepointyr2:FeedLocal RUSF (A)	-0.0145	-0.11513	0.066397	0.163208	0.924208	0.163208	0.79337		abundance	439	439	pathways
PWY-7268	Feed	ERUSF (B)	FeedERUSF (B)	0.796774	-0.04231	0.595977	0.162504	0.924208	0.298601	0.978239		abundance	439	99	pathways
PWY-7332	timepoint	yr2:FeedERUSF (B)	timepointyr2:FeedERUSF (B)	1.29759	-0.04225	0.948015	0.161952	0.924208	0.297676	0.978239		abundance	439	80	pathways
PWY-7357	Feed	Local RUSF (A)	FeedLocal RUSF (A)	0.163368	0.071838	0.061044	0.16442	0.924208	0.16442	0.79337		abundance	439	439	pathways
PWY-7409	timepoint	yr2:FeedERUSF (B)	timepointyr2:FeedERUSF (B)	-0.76775	-0.04225	0.516946	0.163485	0.924208	0.300243	0.978239		abundance	439	253	pathways
PWY0-1319	timepoint	yr2:FeedLocal RUSF (A)	timepointyr2:FeedLocal RUSF (A)	0.0271	-0.11513	0.098241	0.163938	0.924208	0.163938	0.79337		abundance	439	439	pathways
PWY0-1533	Feed	ERUSF (B)	FeedERUSF (B)	-0.50431	-0.04231	0.330855	0.164339	0.924208	0.301671	0.978239		abundance	439	334	pathways
VALSYN-PWY	Feed	Local RUSF (A)	FeedLocal RUSF (A)	0.135942	0.071838	0.038663	0.163764	0.924208	0.163764	0.79337		abundance	439	439	pathways
PWY-7373	Feed	Local RUSF (A)	FeedLocal RUSF (A)	-2.98634	0	2.13933	0.162737	0.924208	0.29899	0.978239		prevalence	439	148	pathways
UDPNACETYLGALSYN-PWY	timepoint	yr2:FeedERUSF (B)	timepointyr2:FeedERUSF (B)	0.642498	0	0.461468	0.163835	0.924208	0.300828	0.978239		prevalence	439	149	pathways
DARABCATK12-PWY	timepoint	yr2	timepointyr2	-0.96781	-0.52356	0.317553	0.16514	0.924541	0.05019	0.386595		abundance	439	402	pathways
P125-PWY	timepoint	yr2:FeedLocal RUSF (A)	timepointyr2:FeedLocal RUSF (A)	-0.917	-0.11513	0.574652	0.164971	0.924541	0.302727	0.980423		abundance	439	322	pathways
PWY-5667	timepoint	yr2:FeedLocal RUSF (A)	timepointyr2:FeedLocal RUSF (A)	0.026897	-0.11513	0.098277	0.165162	0.924541	0.165162	0.79337		abundance	439	439	pathways
COBALSYN-PWY	timepoint	yr2:FeedERUSF (B)	timepointyr2:FeedERUSF (B)	-0.31593	-0.04225	0.194953	0.166912	0.924782	0.166912	0.79337		abundance	439	439	pathways
PWY-5384	timepoint	yr2:FeedLocal RUSF (A)	timepointyr2:FeedLocal RUSF (A)	-0.39442	-0.11513	0.199807	0.167025	0.924782	0.167025	0.79337		abundance	439	439	pathways
PWY-6124	timepoint	yr2:FeedERUSF (B)	timepointyr2:FeedERUSF (B)	0.110316	-0.04225	0.105081	0.166837	0.924782	0.166837	0.79337		abundance	439	439	pathways
PWY-6124	timepoint	yr2:FeedLocal RUSF (A)	timepointyr2:FeedLocal RUSF (A)	0.035828	-0.11513	0.105117	0.165978	0.924782	0.165978	0.79337		abundance	439	439	pathways
PWY-6318	Feed	Local RUSF (A)	FeedLocal RUSF (A)	-0.33034	0.071838	0.288777	0.165821	0.924782	0.304145	0.983773		abundance	439	282	pathways
PWY-6969	timepoint	yr2:FeedERUSF (B)	timepointyr2:FeedERUSF (B)	0.257721	-0.04225	0.213584	0.165979	0.924782	0.165979	0.79337		abundance	439	439	pathways
PWY-7198	Feed	Local RUSF (A)	FeedLocal RUSF (A)	-0.10987	0.071838	0.129005	0.166672	0.924782	0.166672	0.79337		abundance	439	439	pathways
PWY-7229	timepoint	yr2:FeedERUSF (B)	timepointyr2:FeedERUSF (B)	0.082785	-0.04225	0.084081	0.166947	0.924782	0.166947	0.79337		abundance	439	439	pathways
PROPFERM-PWY	timepoint	yr2	timepointyr2	0.670187	-0.52356	0.851951	0.168177	0.924861	0.052775	0.39679		abundance	439	52	pathways
PWY-7268	timepoint	yr2	timepointyr2	0.360309	-0.52356	0.629403	0.167548	0.924861	0.307023	0.986861		abundance	439	99	pathways
PWY-8188	timepoint	yr2	timepointyr2	0.670187	-0.52356	0.851951	0.168031	0.924861	0.052775	0.39679		abundance	439	52	pathways
PWY-8189	timepoint	yr2	timepointyr2	0.670187	-0.52356	0.851951	0.16777	0.924861	0.052775	0.39679		abundance	439	52	pathways
KDO-NAGLIPASYN-PWY	timepoint	yr2	timepointyr2	-0.48503	0	0.351413	0.167513	0.924861	0.100172	0.578696		prevalence	439	400	pathways
ARGSYNBSUB-PWY	Feed	ERUSF (B)	FeedERUSF (B)	0.057304	-0.04231	0.069237	0.16889	0.927528	0.16889	0.799269		abundance	439	439	pathways
PWY-6703	timepoint	yr2:FeedERUSF (B)	timepointyr2:FeedERUSF (B)	0.156799	-0.04225	0.141598	0.170993	0.935911	0.170993	0.806246		abundance	439	439	pathways
PWY-8190	timepoint	yr2:FeedLocal RUSF (A)	timepointyr2:FeedLocal RUSF (A)	0.927521	-0.11513	0.757903	0.171369	0.935911	0.31337	1		abundance	439	143	pathways
PWY-5850	timepoint	yr2	timepointyr2	-0.47545	0	0.347716	0.171519	0.935911	0.087942	0.540937		prevalence	439	392	pathways
PWY-5860	timepoint	yr2	timepointyr2	-0.47545	0	0.347716	0.171519	0.935911	0.032524	0.291693		prevalence	439	392	pathways
PWY66-367	timepoint	yr2:FeedLocal RUSF (A)	timepointyr2:FeedLocal RUSF (A)	0.626195	0	0.458019	0.171568	0.935911	0.313701	1		prevalence	439	297	pathways
PWY-6396	timepoint	yr2	timepointyr2	0.109234	-0.52356	0.459749	0.171988	0.936941	0.004991	0.070735		abundance	439	236	pathways
PWY-7013	timepoint	yr2:FeedERUSF (B)	timepointyr2:FeedERUSF (B)	0.569802	-0.04225	0.446871	0.173066	0.941553	0.31618	1		abundance	439	407	pathways
GLUCUROCAT-PWY	Feed	Local RUSF (A)	FeedLocal RUSF (A)	-0.10527	0.071838	0.127672	0.173713	0.942551	0.173713	0.813092		abundance	439	439	pathways
P42-PWY	Feed	Local RUSF (A)	FeedLocal RUSF (A)	-0.16877	0.071838	0.175001	0.173527	0.942551	0.173527	0.813092		abundance	439	439	pathways
PWY-5870	timepoint	yr2:FeedLocal RUSF (A)	timepointyr2:FeedLocal RUSF (A)	-1.27926	-0.11513	0.848744	0.17419	0.943876	0.318037	1		abundance	439	84	pathways
PWY-6435	timepoint	yr2:FeedLocal RUSF (A)	timepointyr2:FeedLocal RUSF (A)	0.424839	-0.11513	0.395797	0.174444	0.943967	0.318457	1		abundance	439	390	pathways
[truncated: 4,757 more rows]

## Sheet: S4
Modifiable data
Plasma amino acid (baseline)
Gut microbiome species
[truncated: 20 more rows]

## Sheet: S5
Top features for pc1	Contribution (loading)		Top features for pc2	Contribution (loading)		Top features for pc3	Contribution (loading)		Top features for pc4	Contribution (loading)		Top features for pc5	Contribution (loading)		Top features for pc6	Contribution (loading)		Top features for pc7	Contribution (loading)		Top features for pc8	Contribution (loading)		Top features for pc9	Contribution (loading)		Top features for pc10	Contribution (loading)
[truncated: 20 more rows]

[truncated: 4 more sheets: S6, S7, S8, S9]
